# Supplementary material for: Molecular insights into the in situ early-stage assembly of metal–organic frameworks on cellulose nanofibrils
Source: Royal Society of Chemistry journal article supplement (doi:10.1039/d4ta05512h), 2024-01-01
Supplement: d4ta05512h1.pdf [file d4ta05512h1.pdf]

CREATED BY Kailong Zhang

|      |   |     |     |       |        |        |        |      |      |
|------|---|-----|-----|-------|--------|--------|--------|------|------|
| ATOM | 1 | ZN  | DZN | X 536 | 68.580 | 62.770 | 79.900 | 0.00 | 0.00 |
| ATOM | 2 | DM1 | DZN | X 536 | 68.240 | 62.990 | 80.720 | 0.00 | 0.00 |
| ATOM | 3 | DM2 | DZN | X 536 | 69.460 | 62.920 | 80.170 | 0.00 | 0.00 |
| ATOM | 4 | DM3 | DZN | X 536 | 68.520 | 63.650 | 79.610 | 0.00 | 0.00 |
| ATOM | 5 | DM4 | DZN | X 536 | 67.700 | 62.630 | 79.580 | 0.00 | 0.00 |
| ATOM | 6 | DM5 | DZN | X 536 | 68.620 | 61.870 | 80.120 | 0.00 | 0.00 |
| ATOM | 7 | DM6 | DZN | X 536 | 68.940 | 62.510 | 79.020 | 0.00 | 0.00 |

END
