# Supplementary material for: Molecular insights into the in situ early-stage assembly of metal–organic frameworks on cellulose nanofibrils
Source: Royal Society of Chemistry journal article supplement (doi:10.1039/d4ta05512h), 2024-01-01
Supplement: d4ta05512h3.pdf [file d4ta05512h3.pdf]

CREATED BY Kailong Zhang

|      |    |     |      |   |       |                |      |      |      |
|------|----|-----|------|---|-------|----------------|------|------|------|
| ATOM | 1  | C1  | BGLC | 1 | 2.590 | 10.766-106.074 | 1.00 | 2.00 | CARA |
| ATOM | 2  | H1  | BGLC | 1 | 1.832 | 10.003-105.942 | 1.00 | 0.00 | CARA |
| ATOM | 3  | O1  | BGLC | 1 | 2.866 | 11.487-104.888 | 1.00 | 2.00 | CARA |
| ATOM | 4  | HO1 | BGLC | 1 | 3.253 | 12.293-105.153 | 1.00 | 0.00 | CARA |
| ATOM | 5  | C5  | BGLC | 1 | 3.723 | 9.578-107.800  | 1.00 | 2.00 | CARA |
| ATOM | 6  | H5  | BGLC | 1 | 2.996 | 8.748-107.686  | 1.00 | 0.00 | CARA |
| ATOM | 7  | O5  | BGLC | 1 | 3.843 | 10.329-106.577 | 1.00 | 2.00 | CARA |
| ATOM | 8  | C2  | BGLC | 1 | 1.966 | 11.763-107.060 | 1.00 | 2.00 | CARA |
| ATOM | 9  | H2  | BGLC | 1 | 2.540 | 12.744-107.086 | 1.00 | 0.00 | CARA |
| ATOM | 10 | O2  | BGLC | 1 | 0.672 | 12.052-106.527 | 1.00 | 2.00 | CARA |
| ATOM | 11 | HO2 | BGLC | 1 | 0.406 | 12.967-106.518 | 1.00 | 0.00 | CARA |
| ATOM | 12 | C3  | BGLC | 1 | 1.858 | 11.160-108.441 | 1.00 | 2.00 | CARA |
| ATOM | 13 | H3  | BGLC | 1 | 1.135 | 10.347-108.394 | 1.00 | 0.00 | CARA |
| ATOM | 14 | O3  | BGLC | 1 | 1.513 | 12.190-109.389 | 1.00 | 2.00 | CARA |
| ATOM | 15 | HO3 | BGLC | 1 | 0.649 | 12.570-109.398 | 1.00 | 0.00 | CARA |
| ATOM | 16 | C4  | BGLC | 1 | 3.144 | 10.464-108.857 | 1.00 | 2.00 | CARA |
| ATOM | 17 | H4  | BGLC | 1 | 3.858 | 11.251-109.080 | 1.00 | 0.00 | CARA |
| ATOM | 18 | O4  | BGLC | 1 | 3.079 | 9.805-110.084  | 1.00 | 2.00 | CARA |
| ATOM | 19 | C6  | BGLC | 1 | 5.109 | 9.053-108.107  | 1.00 | 2.00 | CARA |
| ATOM | 20 | H61 | BGLC | 1 | 5.632 | 9.957-108.581  | 1.00 | 0.00 | CARA |
| ATOM | 21 | H62 | BGLC | 1 | 5.755 | 8.793-107.275  | 1.00 | 0.00 | CARA |
| ATOM | 22 | O6  | BGLC | 1 | 5.053 | 8.102-109.155  | 1.00 | 2.00 | CARA |
| ATOM | 23 | HO6 | BGLC | 1 | 4.469 | 7.356-109.067  | 1.00 | 0.00 | CARA |
| ATOM | 24 | C1  | BGLC | 2 | 3.248 | 10.430-111.263 | 1.00 | 2.00 | CARA |
| ATOM | 25 | H1  | BGLC | 2 | 3.918 | 11.276-111.168 | 1.00 | 0.00 | CARA |
| ATOM | 26 | C5  | BGLC | 2 | 2.113 | 11.611-112.993 | 1.00 | 2.00 | CARA |
| ATOM | 27 | H5  | BGLC | 2 | 2.839 | 12.442-112.883 | 1.00 | 0.00 | CARA |
| ATOM | 28 | O5  | BGLC | 2 | 1.994 | 10.865-111.767 | 1.00 | 2.00 | CARA |
| ATOM | 29 | C2  | BGLC | 2 | 3.869 | 9.429-112.246  | 1.00 | 2.00 | CARA |
| ATOM | 30 | H2  | BGLC | 2 | 3.294 | 8.448-112.268  | 1.00 | 0.00 | CARA |
| ATOM | 31 | O2  | BGLC | 2 | 5.165 | 9.142-111.713  | 1.00 | 2.00 | CARA |
| ATOM | 32 | HO2 | BGLC | 2 | 5.431 | 8.227-111.700  | 1.00 | 0.00 | CARA |
| ATOM | 33 | C3  | BGLC | 2 | 3.977 | 10.027-113.630 | 1.00 | 2.00 | CARA |
| ATOM | 34 | H3  | BGLC | 2 | 4.701 | 10.840-113.587 | 1.00 | 0.00 | CARA |
| ATOM | 35 | O3  | BGLC | 2 | 4.322 | 8.993-114.574  | 1.00 | 2.00 | CARA |
| ATOM | 36 | HO3 | BGLC | 2 | 5.186 | 8.613-114.581  | 1.00 | 0.00 | CARA |
| ATOM | 37 | C4  | BGLC | 2 | 2.691 | 10.722-114.047 | 1.00 | 2.00 | CARA |
| ATOM | 38 | H4  | BGLC | 2 | 1.978 | 9.933-114.266  | 1.00 | 0.00 | CARA |
| ATOM | 39 | O4  | BGLC | 2 | 2.753 | 11.376-115.277 | 1.00 | 2.00 | CARA |
| ATOM | 40 | C6  | BGLC | 2 | 0.727 | 12.134-113.301 | 1.00 | 2.00 | CARA |
| ATOM | 41 | H61 | BGLC | 2 | 0.204 | 11.229-113.772 | 1.00 | 0.00 | CARA |
| ATOM | 42 | H62 | BGLC | 2 | 0.081 | 12.397-112.469 | 1.00 | 0.00 | CARA |
| ATOM | 43 | O6  | BGLC | 2 | 0.783 | 13.082-114.353 | 1.00 | 2.00 | CARA |
| ATOM | 44 | HO6 | BGLC | 2 | 1.367 | 13.829-114.267 | 1.00 | 0.00 | CARA |
| ATOM | 45 | C1  | BGLC | 3 | 2.585 | 10.745-116.453 | 1.00 | 2.00 | CARA |
| ATOM | 46 | H1  | BGLC | 3 | 1.916 | 9.898-116.354  | 1.00 | 0.00 | CARA |
| ATOM | 47 | C5  | BGLC | 3 | 3.718 | 9.557-118.180  | 1.00 | 2.00 | CARA |
| ATOM | 48 | H5  | BGLC | 3 | 2.992 | 8.726-118.066  | 1.00 | 0.00 | CARA |
| ATOM | 49 | O5  | BGLC | 3 | 3.838 | 10.308-116.957 | 1.00 | 2.00 | CARA |
| ATOM | 50 | C2  | BGLC | 3 | 1.962 | 11.743-117.440 | 1.00 | 2.00 | CARA |
| ATOM | 51 | H2  | BGLC | 3 | 2.535 | 12.725-117.467 | 1.00 | 0.00 | CARA |
| ATOM | 52 | O2  | BGLC | 3 | 0.668 | 12.031-116.907 | 1.00 | 2.00 | CARA |

|      |     |     |      |   |       |                |      |      |      |
|------|-----|-----|------|---|-------|----------------|------|------|------|
| ATOM | 53  | HO2 | BGLC | 3 | 0.401 | 12.946-116.897 | 1.00 | 0.00 | CARA |
| ATOM | 54  | C3  | BGLC | 3 | 1.855 | 11.139-118.821 | 1.00 | 2.00 | CARA |
| ATOM | 55  | H3  | BGLC | 3 | 1.132 | 10.326-118.772 | 1.00 | 0.00 | CARA |
| ATOM | 56  | O3  | BGLC | 3 | 1.508 | 12.168-119.769 | 1.00 | 2.00 | CARA |
| ATOM | 57  | HO3 | BGLC | 3 | 0.643 | 12.547-119.778 | 1.00 | 0.00 | CARA |
| ATOM | 58  | C4  | BGLC | 3 | 3.140 | 10.443-119.237 | 1.00 | 2.00 | CARA |
| ATOM | 59  | H4  | BGLC | 3 | 3.854 | 11.230-119.460 | 1.00 | 0.00 | CARA |
| ATOM | 60  | O4  | BGLC | 3 | 3.075 | 9.785-120.464  | 1.00 | 2.00 | CARA |
| ATOM | 61  | C6  | BGLC | 3 | 5.104 | 9.033-118.487  | 1.00 | 2.00 | CARA |
| ATOM | 62  | H61 | BGLC | 3 | 5.626 | 9.937-118.962  | 1.00 | 0.00 | CARA |
| ATOM | 63  | H62 | BGLC | 3 | 5.750 | 8.773-117.655  | 1.00 | 0.00 | CARA |
| ATOM | 64  | O6  | BGLC | 3 | 5.048 | 8.082-119.535  | 1.00 | 2.00 | CARA |
| ATOM | 65  | HO6 | BGLC | 3 | 4.464 | 7.335-119.446  | 1.00 | 0.00 | CARA |
| ATOM | 66  | C1  | BGLC | 4 | 3.244 | 10.409-121.643 | 1.00 | 2.00 | CARA |
| ATOM | 67  | H1  | BGLC | 4 | 3.915 | 11.255-121.548 | 1.00 | 0.00 | CARA |
| ATOM | 68  | C5  | BGLC | 4 | 2.109 | 11.589-123.373 | 1.00 | 2.00 | CARA |
| ATOM | 69  | H5  | BGLC | 4 | 2.836 | 12.420-123.264 | 1.00 | 0.00 | CARA |
| ATOM | 70  | O5  | BGLC | 4 | 1.990 | 10.844-122.147 | 1.00 | 2.00 | CARA |
| ATOM | 71  | C2  | BGLC | 4 | 3.865 | 9.409-122.626  | 1.00 | 2.00 | CARA |
| ATOM | 72  | H2  | BGLC | 4 | 3.290 | 8.428-122.647  | 1.00 | 0.00 | CARA |
| ATOM | 73  | O2  | BGLC | 4 | 5.160 | 9.122-122.093  | 1.00 | 2.00 | CARA |
| ATOM | 74  | HO2 | BGLC | 4 | 5.426 | 8.207-122.080  | 1.00 | 0.00 | CARA |
| ATOM | 75  | C3  | BGLC | 4 | 3.972 | 10.006-124.010 | 1.00 | 2.00 | CARA |
| ATOM | 76  | H3  | BGLC | 4 | 4.696 | 10.819-123.965 | 1.00 | 0.00 | CARA |
| ATOM | 77  | O3  | BGLC | 4 | 4.318 | 8.973-124.954  | 1.00 | 2.00 | CARA |
| ATOM | 78  | HO3 | BGLC | 4 | 5.183 | 8.594-124.962  | 1.00 | 0.00 | CARA |
| ATOM | 79  | C4  | BGLC | 4 | 2.687 | 10.701-124.427 | 1.00 | 2.00 | CARA |
| ATOM | 80  | H4  | BGLC | 4 | 1.974 | 9.912-124.646  | 1.00 | 0.00 | CARA |
| ATOM | 81  | O4  | BGLC | 4 | 2.749 | 11.355-125.657 | 1.00 | 2.00 | CARA |
| ATOM | 82  | C6  | BGLC | 4 | 0.722 | 12.113-123.681 | 1.00 | 2.00 | CARA |
| ATOM | 83  | H61 | BGLC | 4 | 0.199 | 11.208-124.153 | 1.00 | 0.00 | CARA |
| ATOM | 84  | H62 | BGLC | 4 | 0.076 | 12.375-122.849 | 1.00 | 0.00 | CARA |
| ATOM | 85  | O6  | BGLC | 4 | 0.778 | 13.062-124.733 | 1.00 | 2.00 | CARA |
| ATOM | 86  | HO6 | BGLC | 4 | 1.362 | 13.809-124.647 | 1.00 | 0.00 | CARA |
| ATOM | 87  | C1  | BGLC | 5 | 2.581 | 10.724-126.833 | 1.00 | 2.00 | CARA |
| ATOM | 88  | H1  | BGLC | 5 | 1.912 | 9.877-126.734  | 1.00 | 0.00 | CARA |
| ATOM | 89  | C5  | BGLC | 5 | 3.714 | 9.537-128.560  | 1.00 | 2.00 | CARA |
| ATOM | 90  | H5  | BGLC | 5 | 2.987 | 8.707-128.446  | 1.00 | 0.00 | CARA |
| ATOM | 91  | O5  | BGLC | 5 | 3.835 | 10.288-127.337 | 1.00 | 2.00 | CARA |
| ATOM | 92  | C2  | BGLC | 5 | 1.957 | 11.721-127.820 | 1.00 | 2.00 | CARA |
| ATOM | 93  | H2  | BGLC | 5 | 2.531 | 12.702-127.845 | 1.00 | 0.00 | CARA |
| ATOM | 94  | O2  | BGLC | 5 | 0.663 | 12.010-127.287 | 1.00 | 2.00 | CARA |
| ATOM | 95  | HO2 | BGLC | 5 | 0.397 | 12.925-127.278 | 1.00 | 0.00 | CARA |
| ATOM | 96  | C3  | BGLC | 5 | 1.850 | 11.119-129.201 | 1.00 | 2.00 | CARA |
| ATOM | 97  | H3  | BGLC | 5 | 1.126 | 10.306-129.152 | 1.00 | 0.00 | CARA |
| ATOM | 98  | O3  | BGLC | 5 | 1.503 | 12.148-130.149 | 1.00 | 2.00 | CARA |
| ATOM | 99  | HO3 | BGLC | 5 | 0.638 | 12.526-130.158 | 1.00 | 0.00 | CARA |
| ATOM | 100 | C4  | BGLC | 5 | 3.135 | 10.422-129.617 | 1.00 | 2.00 | CARA |
| ATOM | 101 | H4  | BGLC | 5 | 3.849 | 11.209-129.840 | 1.00 | 0.00 | CARA |
| ATOM | 102 | O4  | BGLC | 5 | 3.070 | 9.764-130.844  | 1.00 | 2.00 | CARA |
| ATOM | 103 | C6  | BGLC | 5 | 5.100 | 9.011-128.867  | 1.00 | 2.00 | CARA |
| ATOM | 104 | H61 | BGLC | 5 | 5.624 | 9.914-129.341  | 1.00 | 0.00 | CARA |
| ATOM | 105 | H62 | BGLC | 5 | 5.746 | 8.750-128.035  | 1.00 | 0.00 | CARA |
| ATOM | 106 | O6  | BGLC | 5 | 5.043 | 8.061-129.915  | 1.00 | 2.00 | CARA |

|      |     |     |      |   |       |                |      |      |      |
|------|-----|-----|------|---|-------|----------------|------|------|------|
| ATOM | 107 | HO6 | BGLC | 5 | 4.458 | 7.315-129.827  | 1.00 | 0.00 | CARA |
| ATOM | 108 | C1  | BGLC | 6 | 3.239 | 10.388-132.023 | 1.00 | 2.00 | CARA |
| ATOM | 109 | H1  | BGLC | 6 | 3.909 | 11.234-131.928 | 1.00 | 0.00 | CARA |
| ATOM | 110 | C5  | BGLC | 6 | 2.104 | 11.570-133.753 | 1.00 | 2.00 | CARA |
| ATOM | 111 | H5  | BGLC | 6 | 2.830 | 12.401-133.642 | 1.00 | 0.00 | CARA |
| ATOM | 112 | O5  | BGLC | 6 | 1.984 | 10.823-132.527 | 1.00 | 2.00 | CARA |
| ATOM | 113 | C2  | BGLC | 6 | 3.862 | 9.388-133.006  | 1.00 | 2.00 | CARA |
| ATOM | 114 | H2  | BGLC | 6 | 3.287 | 8.406-133.026  | 1.00 | 0.00 | CARA |
| ATOM | 115 | O2  | BGLC | 6 | 5.157 | 9.101-132.473  | 1.00 | 2.00 | CARA |
| ATOM | 116 | HO2 | BGLC | 6 | 5.424 | 8.186-132.461  | 1.00 | 0.00 | CARA |
| ATOM | 117 | C3  | BGLC | 6 | 3.967 | 9.984-134.390  | 1.00 | 2.00 | CARA |
| ATOM | 118 | H3  | BGLC | 6 | 4.691 | 10.797-134.344 | 1.00 | 0.00 | CARA |
| ATOM | 119 | O3  | BGLC | 6 | 4.313 | 8.952-135.334  | 1.00 | 2.00 | CARA |
| ATOM | 120 | HO3 | BGLC | 6 | 5.178 | 8.574-135.343  | 1.00 | 0.00 | CARA |
| ATOM | 121 | C4  | BGLC | 6 | 2.683 | 10.680-134.807 | 1.00 | 2.00 | CARA |
| ATOM | 122 | H4  | BGLC | 6 | 1.970 | 9.891-135.026  | 1.00 | 0.00 | CARA |
| ATOM | 123 | O4  | BGLC | 6 | 2.745 | 11.335-136.037 | 1.00 | 2.00 | CARA |
| ATOM | 124 | C6  | BGLC | 6 | 0.718 | 12.093-134.061 | 1.00 | 2.00 | CARA |
| ATOM | 125 | O61 | BGLC | 6 | 0.698 | 13.508-134.110 | 1.00 | 0.00 | CARA |
| ATOM | 126 | O62 | BGLC | 6 | 0.039 | 11.242-134.176 | 1.00 | 0.00 | CARA |
| ATOM | 127 | C1  | BGLC | 7 | 2.576 | 10.703-137.213 | 1.00 | 2.00 | CARA |
| ATOM | 128 | H1  | BGLC | 7 | 1.907 | 9.856-137.113  | 1.00 | 0.00 | CARA |
| ATOM | 129 | C5  | BGLC | 7 | 3.710 | 9.516-138.940  | 1.00 | 2.00 | CARA |
| ATOM | 130 | H5  | BGLC | 7 | 2.983 | 8.686-138.826  | 1.00 | 0.00 | CARA |
| ATOM | 131 | O5  | BGLC | 7 | 3.830 | 10.267-137.717 | 1.00 | 2.00 | CARA |
| ATOM | 132 | C2  | BGLC | 7 | 1.954 | 11.700-138.200 | 1.00 | 2.00 | CARA |
| ATOM | 133 | H2  | BGLC | 7 | 2.530 | 12.681-138.226 | 1.00 | 0.00 | CARA |
| ATOM | 134 | O2  | BGLC | 7 | 0.659 | 11.990-137.667 | 1.00 | 2.00 | CARA |
| ATOM | 135 | HO2 | BGLC | 7 | 0.393 | 12.905-137.658 | 1.00 | 0.00 | CARA |
| ATOM | 136 | C3  | BGLC | 7 | 1.845 | 11.098-139.581 | 1.00 | 2.00 | CARA |
| ATOM | 137 | H3  | BGLC | 7 | 1.122 | 10.285-139.533 | 1.00 | 0.00 | CARA |
| ATOM | 138 | O3  | BGLC | 7 | 1.499 | 12.127-140.529 | 1.00 | 2.00 | CARA |
| ATOM | 139 | HO3 | BGLC | 7 | 0.635 | 12.507-140.538 | 1.00 | 0.00 | CARA |
| ATOM | 140 | C4  | BGLC | 7 | 3.130 | 10.402-139.997 | 1.00 | 2.00 | CARA |
| ATOM | 141 | H4  | BGLC | 7 | 3.844 | 11.189-140.220 | 1.00 | 0.00 | CARA |
| ATOM | 142 | O4  | BGLC | 7 | 3.065 | 9.743-141.224  | 1.00 | 2.00 | CARA |
| ATOM | 143 | C6  | BGLC | 7 | 5.096 | 8.991-139.247  | 1.00 | 2.00 | CARA |
| ATOM | 144 | H61 | BGLC | 7 | 5.619 | 9.894-139.722  | 1.00 | 0.00 | CARA |
| ATOM | 145 | H62 | BGLC | 7 | 5.742 | 8.731-138.415  | 1.00 | 0.00 | CARA |
| ATOM | 146 | O6  | BGLC | 7 | 5.040 | 8.039-140.295  | 1.00 | 2.00 | CARA |
| ATOM | 147 | HO6 | BGLC | 7 | 4.456 | 7.292-140.206  | 1.00 | 0.00 | CARA |
| ATOM | 148 | C1  | BGLC | 8 | 3.234 | 10.368-142.403 | 1.00 | 2.00 | CARA |
| ATOM | 149 | H1  | BGLC | 8 | 3.904 | 11.215-142.308 | 1.00 | 0.00 | CARA |
| ATOM | 150 | C5  | BGLC | 8 | 2.100 | 11.548-144.133 | 1.00 | 2.00 | CARA |
| ATOM | 151 | H5  | BGLC | 8 | 2.827 | 12.379-144.023 | 1.00 | 0.00 | CARA |
| ATOM | 152 | O5  | BGLC | 8 | 1.981 | 10.802-142.907 | 1.00 | 2.00 | CARA |
| ATOM | 153 | C2  | BGLC | 8 | 3.856 | 9.367-143.386  | 1.00 | 2.00 | CARA |
| ATOM | 154 | H2  | BGLC | 8 | 3.281 | 8.386-143.408  | 1.00 | 0.00 | CARA |
| ATOM | 155 | O2  | BGLC | 8 | 5.152 | 9.079-142.853  | 1.00 | 2.00 | CARA |
| ATOM | 156 | HO2 | BGLC | 8 | 5.418 | 8.164-142.840  | 1.00 | 0.00 | CARA |
| ATOM | 157 | C3  | BGLC | 8 | 3.963 | 9.965-144.770  | 1.00 | 2.00 | CARA |
| ATOM | 158 | H3  | BGLC | 8 | 4.686 | 10.779-144.727 | 1.00 | 0.00 | CARA |
| ATOM | 159 | O3  | BGLC | 8 | 4.308 | 8.931-145.714  | 1.00 | 2.00 | CARA |
| ATOM | 160 | HO3 | BGLC | 8 | 5.172 | 8.551-145.722  | 1.00 | 0.00 | CARA |

|      |     |     |      |    |       |                |      |      |      |
|------|-----|-----|------|----|-------|----------------|------|------|------|
| ATOM | 161 | C4  | BGLC | 8  | 2.677 | 10.659-145.187 | 1.00 | 2.00 | CARA |
| ATOM | 162 | H4  | BGLC | 8  | 1.963 | 9.871-145.406  | 1.00 | 0.00 | CARA |
| ATOM | 163 | O4  | BGLC | 8  | 2.740 | 11.313-146.417 | 1.00 | 2.00 | CARA |
| ATOM | 164 | C6  | BGLC | 8  | 0.714 | 12.072-144.441 | 1.00 | 2.00 | CARA |
| ATOM | 165 | H61 | BGLC | 8  | 0.191 | 11.166-144.911 | 1.00 | 0.00 | CARA |
| ATOM | 166 | H62 | BGLC | 8  | 0.068 | 12.336-143.609 | 1.00 | 0.00 | CARA |
| ATOM | 167 | O6  | BGLC | 8  | 0.769 | 13.019-145.493 | 1.00 | 2.00 | CARA |
| ATOM | 168 | HO6 | BGLC | 8  | 1.353 | 13.766-145.408 | 1.00 | 0.00 | CARA |
| ATOM | 169 | C1  | BGLC | 9  | 2.572 | 10.683-147.593 | 1.00 | 2.00 | CARA |
| ATOM | 170 | H1  | BGLC | 9  | 1.903 | 9.837-147.494  | 1.00 | 0.00 | CARA |
| ATOM | 171 | C5  | BGLC | 9  | 3.705 | 9.495-149.320  | 1.00 | 2.00 | CARA |
| ATOM | 172 | H5  | BGLC | 9  | 2.978 | 8.665-149.206  | 1.00 | 0.00 | CARA |
| ATOM | 173 | O5  | BGLC | 9  | 3.825 | 10.246-148.097 | 1.00 | 2.00 | CARA |
| ATOM | 174 | C2  | BGLC | 9  | 1.949 | 11.680-148.580 | 1.00 | 2.00 | CARA |
| ATOM | 175 | H2  | BGLC | 9  | 2.524 | 12.661-148.606 | 1.00 | 0.00 | CARA |
| ATOM | 176 | O2  | BGLC | 9  | 0.654 | 11.969-148.047 | 1.00 | 2.00 | CARA |
| ATOM | 177 | HO2 | BGLC | 9  | 0.387 | 12.884-148.038 | 1.00 | 0.00 | CARA |
| ATOM | 178 | C3  | BGLC | 9  | 1.841 | 11.078-149.961 | 1.00 | 2.00 | CARA |
| ATOM | 179 | H3  | BGLC | 9  | 1.117 | 10.265-149.912 | 1.00 | 0.00 | CARA |
| ATOM | 180 | O3  | BGLC | 9  | 1.496 | 12.106-150.909 | 1.00 | 2.00 | CARA |
| ATOM | 181 | HO3 | BGLC | 9  | 0.632 | 12.486-150.918 | 1.00 | 0.00 | CARA |
| ATOM | 182 | C4  | BGLC | 9  | 3.125 | 10.381-150.377 | 1.00 | 2.00 | CARA |
| ATOM | 183 | H4  | BGLC | 9  | 3.838 | 11.169-150.600 | 1.00 | 0.00 | CARA |
| ATOM | 184 | O4  | BGLC | 9  | 3.061 | 9.722-151.604  | 1.00 | 2.00 | CARA |
| ATOM | 185 | C6  | BGLC | 9  | 5.091 | 8.970-149.627  | 1.00 | 2.00 | CARA |
| ATOM | 186 | H61 | BGLC | 9  | 5.614 | 9.874-150.101  | 1.00 | 0.00 | CARA |
| ATOM | 187 | H62 | BGLC | 9  | 5.737 | 8.710-148.795  | 1.00 | 0.00 | CARA |
| ATOM | 188 | O6  | BGLC | 9  | 5.035 | 8.019-150.675  | 1.00 | 2.00 | CARA |
| ATOM | 189 | HO6 | BGLC | 9  | 4.451 | 7.273-150.587  | 1.00 | 0.00 | CARA |
| ATOM | 190 | C1  | BGLC | 10 | 3.230 | 10.348-152.783 | 1.00 | 2.00 | CARA |
| ATOM | 191 | H1  | BGLC | 10 | 3.899 | 11.195-152.687 | 1.00 | 0.00 | CARA |
| ATOM | 192 | C5  | BGLC | 10 | 2.096 | 11.527-154.513 | 1.00 | 2.00 | CARA |
| ATOM | 193 | H5  | BGLC | 10 | 2.823 | 12.357-154.403 | 1.00 | 0.00 | CARA |
| ATOM | 194 | O5  | BGLC | 10 | 1.976 | 10.781-153.287 | 1.00 | 2.00 | CARA |
| ATOM | 195 | C2  | BGLC | 10 | 3.852 | 9.346-153.766  | 1.00 | 2.00 | CARA |
| ATOM | 196 | H2  | BGLC | 10 | 3.278 | 8.364-153.788  | 1.00 | 0.00 | CARA |
| ATOM | 197 | O2  | BGLC | 10 | 5.147 | 9.059-153.233  | 1.00 | 2.00 | CARA |
| ATOM | 198 | HO2 | BGLC | 10 | 5.413 | 8.144-153.220  | 1.00 | 0.00 | CARA |
| ATOM | 199 | C3  | BGLC | 10 | 3.958 | 9.944-155.150  | 1.00 | 2.00 | CARA |
| ATOM | 200 | H3  | BGLC | 10 | 4.682 | 10.757-155.106 | 1.00 | 0.00 | CARA |
| ATOM | 201 | O3  | BGLC | 10 | 4.305 | 8.910-156.094  | 1.00 | 2.00 | CARA |
| ATOM | 202 | HO3 | BGLC | 10 | 5.170 | 8.532-156.102  | 1.00 | 0.00 | CARA |
| ATOM | 203 | C4  | BGLC | 10 | 2.674 | 10.638-155.567 | 1.00 | 2.00 | CARA |
| ATOM | 204 | H4  | BGLC | 10 | 1.961 | 9.849-155.785  | 1.00 | 0.00 | CARA |
| ATOM | 205 | O4  | BGLC | 10 | 2.735 | 11.292-156.797 | 1.00 | 2.00 | CARA |
| ATOM | 206 | C6  | BGLC | 10 | 0.710 | 12.052-154.821 | 1.00 | 2.00 | CARA |
| ATOM | 207 | O61 | BGLC | 10 | 0.691 | 13.467-154.869 | 1.00 | 0.00 | CARA |
| ATOM | 208 | O62 | BGLC | 10 | 0.030 | 11.202-154.938 | 1.00 | 0.00 | CARA |
| ATOM | 209 | C1  | BGLC | 11 | 2.568 | 10.662-157.973 | 1.00 | 2.00 | CARA |
| ATOM | 210 | H1  | BGLC | 11 | 1.899 | 9.815-157.875  | 1.00 | 0.00 | CARA |
| ATOM | 211 | C5  | BGLC | 11 | 3.700 | 9.475-159.700  | 1.00 | 2.00 | CARA |
| ATOM | 212 | H5  | BGLC | 11 | 2.973 | 8.645-159.587  | 1.00 | 0.00 | CARA |
| ATOM | 213 | O5  | BGLC | 11 | 3.820 | 10.225-158.477 | 1.00 | 2.00 | CARA |
| ATOM | 214 | C2  | BGLC | 11 | 1.944 | 11.659-158.960 | 1.00 | 2.00 | CARA |

|      |     |     |      |    |       |                |      |      |      |
|------|-----|-----|------|----|-------|----------------|------|------|------|
| ATOM | 215 | H2  | BGLC | 11 | 2.518 | 12.640-158.986 | 1.00 | 0.00 | CARA |
| ATOM | 216 | O2  | BGLC | 11 | 0.650 | 11.948-158.427 | 1.00 | 2.00 | CARA |
| ATOM | 217 | HO2 | BGLC | 11 | 0.384 | 12.863-158.418 | 1.00 | 0.00 | CARA |
| ATOM | 218 | C3  | BGLC | 11 | 1.836 | 11.056-160.341 | 1.00 | 2.00 | CARA |
| ATOM | 219 | H3  | BGLC | 11 | 1.113 | 10.242-160.294 | 1.00 | 0.00 | CARA |
| ATOM | 220 | O3  | BGLC | 11 | 1.491 | 12.086-161.289 | 1.00 | 2.00 | CARA |
| ATOM | 221 | HO3 | BGLC | 11 | 0.627 | 12.466-161.298 | 1.00 | 0.00 | CARA |
| ATOM | 222 | C4  | BGLC | 11 | 3.121 | 10.361-160.757 | 1.00 | 2.00 | CARA |
| ATOM | 223 | H4  | BGLC | 11 | 3.834 | 11.149-160.979 | 1.00 | 0.00 | CARA |
| ATOM | 224 | O4  | BGLC | 11 | 3.058 | 9.702-161.984  | 1.00 | 2.00 | CARA |
| ATOM | 225 | C6  | BGLC | 11 | 5.086 | 8.950-160.007  | 1.00 | 2.00 | CARA |
| ATOM | 226 | H61 | BGLC | 11 | 5.609 | 9.853-160.482  | 1.00 | 0.00 | CARA |
| ATOM | 227 | H62 | BGLC | 11 | 5.732 | 8.690-159.175  | 1.00 | 0.00 | CARA |
| ATOM | 228 | O6  | BGLC | 11 | 5.030 | 7.998-161.055  | 1.00 | 2.00 | CARA |
| ATOM | 229 | HO6 | BGLC | 11 | 4.446 | 7.251-160.966  | 1.00 | 0.00 | CARA |
| ATOM | 230 | C1  | BGLC | 12 | 3.226 | 10.327-163.163 | 1.00 | 2.00 | CARA |
| ATOM | 231 | H1  | BGLC | 12 | 3.895 | 11.174-163.068 | 1.00 | 0.00 | CARA |
| ATOM | 232 | C5  | BGLC | 12 | 2.091 | 11.507-164.893 | 1.00 | 2.00 | CARA |
| ATOM | 233 | H5  | BGLC | 12 | 2.818 | 12.338-164.783 | 1.00 | 0.00 | CARA |
| ATOM | 234 | O5  | BGLC | 12 | 1.971 | 10.761-163.667 | 1.00 | 2.00 | CARA |
| ATOM | 235 | C2  | BGLC | 12 | 3.847 | 9.325-164.146  | 1.00 | 2.00 | CARA |
| ATOM | 236 | H2  | BGLC | 12 | 3.273 | 8.343-164.169  | 1.00 | 0.00 | CARA |
| ATOM | 237 | O2  | BGLC | 12 | 5.142 | 9.038-163.613  | 1.00 | 2.00 | CARA |
| ATOM | 238 | HO2 | BGLC | 12 | 5.408 | 8.123-163.599  | 1.00 | 0.00 | CARA |
| ATOM | 239 | C3  | BGLC | 12 | 3.954 | 9.924-165.530  | 1.00 | 2.00 | CARA |
| ATOM | 240 | H3  | BGLC | 12 | 4.678 | 10.737-165.487 | 1.00 | 0.00 | CARA |
| ATOM | 241 | O3  | BGLC | 12 | 4.300 | 8.889-166.474  | 1.00 | 2.00 | CARA |
| ATOM | 242 | HO3 | BGLC | 12 | 5.164 | 8.510-166.481  | 1.00 | 0.00 | CARA |
| ATOM | 243 | C4  | BGLC | 12 | 2.669 | 10.618-165.947 | 1.00 | 2.00 | CARA |
| ATOM | 244 | H4  | BGLC | 12 | 1.955 | 9.830-166.166  | 1.00 | 0.00 | CARA |
| ATOM | 245 | O4  | BGLC | 12 | 2.731 | 11.273-167.177 | 1.00 | 2.00 | CARA |
| ATOM | 246 | C6  | BGLC | 12 | 0.705 | 12.030-165.201 | 1.00 | 2.00 | CARA |
| ATOM | 247 | H61 | BGLC | 12 | 0.182 | 11.124-165.672 | 1.00 | 0.00 | CARA |
| ATOM | 248 | H62 | BGLC | 12 | 0.059 | 12.293-164.369 | 1.00 | 0.00 | CARA |
| ATOM | 249 | O6  | BGLC | 12 | 0.760 | 12.978-166.253 | 1.00 | 2.00 | CARA |
| ATOM | 250 | HO6 | BGLC | 12 | 1.344 | 13.725-166.168 | 1.00 | 0.00 | CARA |
| ATOM | 251 | C1  | BGLC | 13 | 2.563 | 10.642-168.353 | 1.00 | 2.00 | CARA |
| ATOM | 252 | H1  | BGLC | 13 | 1.893 | 9.796-168.254  | 1.00 | 0.00 | CARA |
| ATOM | 253 | C5  | BGLC | 13 | 3.695 | 9.454-170.079  | 1.00 | 2.00 | CARA |
| ATOM | 254 | H5  | BGLC | 13 | 2.968 | 8.624-169.965  | 1.00 | 0.00 | CARA |
| ATOM | 255 | O5  | BGLC | 13 | 3.816 | 10.204-168.857 | 1.00 | 2.00 | CARA |
| ATOM | 256 | C2  | BGLC | 13 | 1.940 | 11.640-169.340 | 1.00 | 2.00 | CARA |
| ATOM | 257 | H2  | BGLC | 13 | 2.513 | 12.622-169.367 | 1.00 | 0.00 | CARA |
| ATOM | 258 | O2  | BGLC | 13 | 0.645 | 11.927-168.807 | 1.00 | 2.00 | CARA |
| ATOM | 259 | HO2 | BGLC | 13 | 0.378 | 12.841-168.797 | 1.00 | 0.00 | CARA |
| ATOM | 260 | C3  | BGLC | 13 | 1.832 | 11.036-170.721 | 1.00 | 2.00 | CARA |
| ATOM | 261 | H3  | BGLC | 13 | 1.108 | 10.223-170.673 | 1.00 | 0.00 | CARA |
| ATOM | 262 | O3  | BGLC | 13 | 1.486 | 12.065-171.669 | 1.00 | 2.00 | CARA |
| ATOM | 263 | HO3 | BGLC | 13 | 0.622 | 12.444-171.678 | 1.00 | 0.00 | CARA |
| ATOM | 264 | C4  | BGLC | 13 | 3.117 | 10.339-171.137 | 1.00 | 2.00 | CARA |
| ATOM | 265 | H4  | BGLC | 13 | 3.831 | 11.126-171.360 | 1.00 | 0.00 | CARA |
| ATOM | 266 | O4  | BGLC | 13 | 3.053 | 9.681-172.364  | 1.00 | 2.00 | CARA |
| ATOM | 267 | C6  | BGLC | 13 | 5.081 | 8.928-170.387  | 1.00 | 2.00 | CARA |
| ATOM | 268 | H61 | BGLC | 13 | 5.604 | 9.832-170.860  | 1.00 | 0.00 | CARA |

|      |     |     |      |    |       |                |      |      |      |
|------|-----|-----|------|----|-------|----------------|------|------|------|
| ATOM | 269 | H62 | BGLC | 13 | 5.727 | 8.667-169.555  | 1.00 | 0.00 | CARA |
| ATOM | 270 | O6  | BGLC | 13 | 5.026 | 7.978-171.435  | 1.00 | 2.00 | CARA |
| ATOM | 271 | HO6 | BGLC | 13 | 4.442 | 7.231-171.347  | 1.00 | 0.00 | CARA |
| ATOM | 272 | C1  | BGLC | 14 | 3.222 | 10.305-173.543 | 1.00 | 2.00 | CARA |
| ATOM | 273 | H1  | BGLC | 14 | 3.893 | 11.151-173.449 | 1.00 | 0.00 | CARA |
| ATOM | 274 | C5  | BGLC | 14 | 2.086 | 11.486-175.273 | 1.00 | 2.00 | CARA |
| ATOM | 275 | H5  | BGLC | 14 | 2.813 | 12.317-175.164 | 1.00 | 0.00 | CARA |
| ATOM | 276 | O5  | BGLC | 14 | 1.967 | 10.741-174.047 | 1.00 | 2.00 | CARA |
| ATOM | 277 | C2  | BGLC | 14 | 3.842 | 9.306-174.526  | 1.00 | 2.00 | CARA |
| ATOM | 278 | H2  | BGLC | 14 | 3.266 | 8.325-174.547  | 1.00 | 0.00 | CARA |
| ATOM | 279 | O2  | BGLC | 14 | 5.139 | 9.018-173.993  | 1.00 | 2.00 | CARA |
| ATOM | 280 | HO2 | BGLC | 14 | 5.405 | 8.103-173.981  | 1.00 | 0.00 | CARA |
| ATOM | 281 | C3  | BGLC | 14 | 3.950 | 9.902-175.910  | 1.00 | 2.00 | CARA |
| ATOM | 282 | H3  | BGLC | 14 | 4.674 | 10.715-175.866 | 1.00 | 0.00 | CARA |
| ATOM | 283 | O3  | BGLC | 14 | 4.295 | 8.869-176.854  | 1.00 | 2.00 | CARA |
| ATOM | 284 | HO3 | BGLC | 14 | 5.159 | 8.489-176.862  | 1.00 | 0.00 | CARA |
| ATOM | 285 | C4  | BGLC | 14 | 2.665 | 10.597-176.327 | 1.00 | 2.00 | CARA |
| ATOM | 286 | H4  | BGLC | 14 | 1.952 | 9.808-176.546  | 1.00 | 0.00 | CARA |
| ATOM | 287 | O4  | BGLC | 14 | 2.727 | 11.251-177.557 | 1.00 | 2.00 | CARA |
| ATOM | 288 | C6  | BGLC | 14 | 0.700 | 12.010-175.581 | 1.00 | 2.00 | CARA |
| ATOM | 289 | O61 | BGLC | 14 | 0.681 | 13.425-175.629 | 1.00 | 0.00 | CARA |
| ATOM | 290 | O62 | BGLC | 14 | 0.021 | 11.160-175.697 | 1.00 | 0.00 | CARA |
| ATOM | 291 | C1  | BGLC | 15 | 2.558 | 10.620-178.733 | 1.00 | 2.00 | CARA |
| ATOM | 292 | H1  | BGLC | 15 | 1.889 | 9.773-178.633  | 1.00 | 0.00 | CARA |
| ATOM | 293 | C5  | BGLC | 15 | 3.692 | 9.434-180.459  | 1.00 | 2.00 | CARA |
| ATOM | 294 | H5  | BGLC | 15 | 2.965 | 8.604-180.345  | 1.00 | 0.00 | CARA |
| ATOM | 295 | O5  | BGLC | 15 | 3.813 | 10.184-179.237 | 1.00 | 2.00 | CARA |
| ATOM | 296 | C2  | BGLC | 15 | 1.935 | 11.618-179.720 | 1.00 | 2.00 | CARA |
| ATOM | 297 | H2  | BGLC | 15 | 2.509 | 12.599-179.746 | 1.00 | 0.00 | CARA |
| ATOM | 298 | O2  | BGLC | 15 | 0.640 | 11.907-179.187 | 1.00 | 2.00 | CARA |
| ATOM | 299 | HO2 | BGLC | 15 | 0.374 | 12.822-179.177 | 1.00 | 0.00 | CARA |
| ATOM | 300 | C3  | BGLC | 15 | 1.827 | 11.015-181.101 | 1.00 | 2.00 | CARA |
| ATOM | 301 | H3  | BGLC | 15 | 1.104 | 10.202-181.052 | 1.00 | 0.00 | CARA |
| ATOM | 302 | O3  | BGLC | 15 | 1.481 | 12.043-182.049 | 1.00 | 2.00 | CARA |
| ATOM | 303 | HO3 | BGLC | 15 | 0.616 | 12.422-182.058 | 1.00 | 0.00 | CARA |
| ATOM | 304 | C4  | BGLC | 15 | 3.112 | 10.319-181.517 | 1.00 | 2.00 | CARA |
| ATOM | 305 | H4  | BGLC | 15 | 3.825 | 11.107-181.740 | 1.00 | 0.00 | CARA |
| ATOM | 306 | O4  | BGLC | 15 | 3.048 | 9.660-182.744  | 1.00 | 2.00 | CARA |
| ATOM | 307 | C6  | BGLC | 15 | 5.077 | 8.908-180.767  | 1.00 | 2.00 | CARA |
| ATOM | 308 | H61 | BGLC | 15 | 5.600 | 9.812-181.241  | 1.00 | 0.00 | CARA |
| ATOM | 309 | H62 | BGLC | 15 | 5.724 | 8.647-179.935  | 1.00 | 0.00 | CARA |
| ATOM | 310 | O6  | BGLC | 15 | 5.021 | 7.957-181.815  | 1.00 | 2.00 | CARA |
| ATOM | 311 | HO6 | BGLC | 15 | 4.437 | 7.211-181.727  | 1.00 | 0.00 | CARA |
| ATOM | 312 | C1  | BGLC | 16 | 3.217 | 10.285-183.923 | 1.00 | 2.00 | CARA |
| ATOM | 313 | H1  | BGLC | 16 | 3.887 | 11.132-183.828 | 1.00 | 0.00 | CARA |
| ATOM | 314 | C5  | BGLC | 16 | 2.081 | 11.466-185.653 | 1.00 | 2.00 | CARA |
| ATOM | 315 | H5  | BGLC | 16 | 2.808 | 12.297-185.543 | 1.00 | 0.00 | CARA |
| ATOM | 316 | O5  | BGLC | 16 | 1.962 | 10.719-184.427 | 1.00 | 2.00 | CARA |
| ATOM | 317 | C2  | BGLC | 16 | 3.838 | 9.284-184.906  | 1.00 | 2.00 | CARA |
| ATOM | 318 | H2  | BGLC | 16 | 3.264 | 8.302-184.928  | 1.00 | 0.00 | CARA |
| ATOM | 319 | O2  | BGLC | 16 | 5.134 | 8.997-184.373  | 1.00 | 2.00 | CARA |
| ATOM | 320 | HO2 | BGLC | 16 | 5.400 | 8.082-184.360  | 1.00 | 0.00 | CARA |
| ATOM | 321 | C3  | BGLC | 16 | 3.945 | 9.882-186.289  | 1.00 | 2.00 | CARA |
| ATOM | 322 | H3  | BGLC | 16 | 4.669 | 10.695-186.244 | 1.00 | 0.00 | CARA |

|      |     |     |      |    |       |                |      |      |      |
|------|-----|-----|------|----|-------|----------------|------|------|------|
| ATOM | 323 | O3  | BGLC | 16 | 4.291 | 8.849-187.234  | 1.00 | 2.00 | CARA |
| ATOM | 324 | HO3 | BGLC | 16 | 5.156 | 8.470-187.242  | 1.00 | 0.00 | CARA |
| ATOM | 325 | C4  | BGLC | 16 | 2.660 | 10.577-186.707 | 1.00 | 2.00 | CARA |
| ATOM | 326 | H4  | BGLC | 16 | 1.947 | 9.788-186.926  | 1.00 | 0.00 | CARA |
| ATOM | 327 | O4  | BGLC | 16 | 2.723 | 11.231-187.937 | 1.00 | 2.00 | CARA |
| ATOM | 328 | C6  | BGLC | 16 | 0.696 | 11.990-185.961 | 1.00 | 2.00 | CARA |
| ATOM | 329 | H61 | BGLC | 16 | 0.172 | 11.084-186.431 | 1.00 | 0.00 | CARA |
| ATOM | 330 | H62 | BGLC | 16 | 0.051 | 12.254-185.129 | 1.00 | 0.00 | CARA |
| ATOM | 331 | O6  | BGLC | 16 | 0.751 | 12.936-187.013 | 1.00 | 2.00 | CARA |
| ATOM | 332 | HO6 | BGLC | 16 | 1.336 | 13.683-186.929 | 1.00 | 0.00 | CARA |
| ATOM | 333 | C1  | BGLC | 17 | 2.553 | 10.600-189.113 | 1.00 | 2.00 | CARA |
| ATOM | 334 | H1  | BGLC | 17 | 1.883 | 9.754-189.013  | 1.00 | 0.00 | CARA |
| ATOM | 335 | C5  | BGLC | 17 | 3.688 | 9.412-190.839  | 1.00 | 2.00 | CARA |
| ATOM | 336 | H5  | BGLC | 17 | 2.962 | 8.581-190.725  | 1.00 | 0.00 | CARA |
| ATOM | 337 | O5  | BGLC | 17 | 3.808 | 10.163-189.617 | 1.00 | 2.00 | CARA |
| ATOM | 338 | C2  | BGLC | 17 | 1.931 | 11.597-190.100 | 1.00 | 2.00 | CARA |
| ATOM | 339 | H2  | BGLC | 17 | 2.505 | 12.578-190.126 | 1.00 | 0.00 | CARA |
| ATOM | 340 | O2  | BGLC | 17 | 0.636 | 11.886-189.567 | 1.00 | 2.00 | CARA |
| ATOM | 341 | HO2 | BGLC | 17 | 0.370 | 12.801-189.557 | 1.00 | 0.00 | CARA |
| ATOM | 342 | C3  | BGLC | 17 | 1.823 | 10.994-191.481 | 1.00 | 2.00 | CARA |
| ATOM | 343 | H3  | BGLC | 17 | 1.100 | 10.181-191.433 | 1.00 | 0.00 | CARA |
| ATOM | 344 | O3  | BGLC | 17 | 1.477 | 12.023-192.429 | 1.00 | 2.00 | CARA |
| ATOM | 345 | HO3 | BGLC | 17 | 0.613 | 12.402-192.438 | 1.00 | 0.00 | CARA |
| ATOM | 346 | C4  | BGLC | 17 | 3.108 | 10.298-191.897 | 1.00 | 2.00 | CARA |
| ATOM | 347 | H4  | BGLC | 17 | 3.822 | 11.085-192.120 | 1.00 | 0.00 | CARA |
| ATOM | 348 | O4  | BGLC | 17 | 3.043 | 9.640-193.124  | 1.00 | 2.00 | CARA |
| ATOM | 349 | C6  | BGLC | 17 | 5.073 | 8.887-191.147  | 1.00 | 2.00 | CARA |
| ATOM | 350 | H61 | BGLC | 17 | 5.595 | 9.791-191.621  | 1.00 | 0.00 | CARA |
| ATOM | 351 | H62 | BGLC | 17 | 5.720 | 8.627-190.315  | 1.00 | 0.00 | CARA |
| ATOM | 352 | O6  | BGLC | 17 | 5.018 | 7.935-192.195  | 1.00 | 2.00 | CARA |
| ATOM | 353 | HO6 | BGLC | 17 | 4.434 | 7.188-192.106  | 1.00 | 0.00 | CARA |
| ATOM | 354 | C1  | BGLC | 18 | 3.212 | 10.264-194.303 | 1.00 | 2.00 | CARA |
| ATOM | 355 | H1  | BGLC | 18 | 3.883 | 11.110-194.208 | 1.00 | 0.00 | CARA |
| ATOM | 356 | C5  | BGLC | 18 | 2.077 | 11.445-196.033 | 1.00 | 2.00 | CARA |
| ATOM | 357 | H5  | BGLC | 18 | 2.803 | 12.276-195.924 | 1.00 | 0.00 | CARA |
| ATOM | 358 | O5  | BGLC | 18 | 1.959 | 10.699-194.807 | 1.00 | 2.00 | CARA |
| ATOM | 359 | C2  | BGLC | 18 | 3.834 | 9.263-195.286  | 1.00 | 2.00 | CARA |
| ATOM | 360 | H2  | BGLC | 18 | 3.260 | 8.281-195.309  | 1.00 | 0.00 | CARA |
| ATOM | 361 | O2  | BGLC | 18 | 5.130 | 8.977-194.753  | 1.00 | 2.00 | CARA |
| ATOM | 362 | HO2 | BGLC | 18 | 5.397 | 8.063-194.740  | 1.00 | 0.00 | CARA |
| ATOM | 363 | C3  | BGLC | 18 | 3.941 | 9.861-196.669  | 1.00 | 2.00 | CARA |
| ATOM | 364 | H3  | BGLC | 18 | 4.664 | 10.675-196.625 | 1.00 | 0.00 | CARA |
| ATOM | 365 | O3  | BGLC | 18 | 4.286 | 8.828-197.614  | 1.00 | 2.00 | CARA |
| ATOM | 366 | HO3 | BGLC | 18 | 5.150 | 8.448-197.622  | 1.00 | 0.00 | CARA |
| ATOM | 367 | C4  | BGLC | 18 | 2.655 | 10.555-197.087 | 1.00 | 2.00 | CARA |
| ATOM | 368 | H4  | BGLC | 18 | 1.941 | 9.767-197.306  | 1.00 | 0.00 | CARA |
| ATOM | 369 | O4  | BGLC | 18 | 2.718 | 11.209-198.317 | 1.00 | 2.00 | CARA |
| ATOM | 370 | C6  | BGLC | 18 | 0.692 | 11.968-196.341 | 1.00 | 2.00 | CARA |
| ATOM | 371 | H61 | BGLC | 18 | 0.169 | 11.062-196.811 | 1.00 | 0.00 | CARA |
| ATOM | 372 | H62 | BGLC | 18 | 0.046 | 12.231-195.509 | 1.00 | 0.00 | CARA |
| ATOM | 373 | O6  | BGLC | 18 | 0.747 | 12.915-197.393 | 1.00 | 2.00 | CARA |
| ATOM | 374 | HO6 | BGLC | 18 | 1.331 | 13.662-197.308 | 1.00 | 0.00 | CARA |
| ATOM | 375 | C1  | BGLC | 19 | 2.549 | 10.579-199.493 | 1.00 | 2.00 | CARA |
| ATOM | 376 | H1  | BGLC | 19 | 1.880 | 9.732-199.394  | 1.00 | 0.00 | CARA |

|      |     |     |      |    |       |                |      |      |      |
|------|-----|-----|------|----|-------|----------------|------|------|------|
| ATOM | 377 | C5  | BGLC | 19 | 3.683 | 9.391-201.219  | 1.00 | 2.00 | CARA |
| ATOM | 378 | H5  | BGLC | 19 | 2.957 | 8.560-201.104  | 1.00 | 0.00 | CARA |
| ATOM | 379 | O5  | BGLC | 19 | 3.803 | 10.143-199.997 | 1.00 | 2.00 | CARA |
| ATOM | 380 | C2  | BGLC | 19 | 1.927 | 11.576-200.480 | 1.00 | 2.00 | CARA |
| ATOM | 381 | H2  | BGLC | 19 | 2.502 | 12.557-200.506 | 1.00 | 0.00 | CARA |
| ATOM | 382 | O2  | BGLC | 19 | 0.632 | 11.865-199.947 | 1.00 | 2.00 | CARA |
| ATOM | 383 | HO2 | BGLC | 19 | 0.366 | 12.780-199.937 | 1.00 | 0.00 | CARA |
| ATOM | 384 | C3  | BGLC | 19 | 1.818 | 10.974-201.861 | 1.00 | 2.00 | CARA |
| ATOM | 385 | H3  | BGLC | 19 | 1.094 | 10.161-201.812 | 1.00 | 0.00 | CARA |
| ATOM | 386 | O3  | BGLC | 19 | 1.472 | 12.002-202.809 | 1.00 | 2.00 | CARA |
| ATOM | 387 | HO3 | BGLC | 19 | 0.608 | 12.382-202.818 | 1.00 | 0.00 | CARA |
| ATOM | 388 | C4  | BGLC | 19 | 3.103 | 10.277-202.277 | 1.00 | 2.00 | CARA |
| ATOM | 389 | H4  | BGLC | 19 | 3.816 | 11.064-202.500 | 1.00 | 0.00 | CARA |
| ATOM | 390 | O4  | BGLC | 19 | 3.039 | 9.618-203.504  | 1.00 | 2.00 | CARA |
| ATOM | 391 | C6  | BGLC | 19 | 5.069 | 8.867-201.527  | 1.00 | 2.00 | CARA |
| ATOM | 392 | H61 | BGLC | 19 | 5.591 | 9.771-202.002  | 1.00 | 0.00 | CARA |
| ATOM | 393 | H62 | BGLC | 19 | 5.716 | 8.608-200.695  | 1.00 | 0.00 | CARA |
| ATOM | 394 | O6  | BGLC | 19 | 5.013 | 7.915-202.575  | 1.00 | 2.00 | CARA |
| ATOM | 395 | HO6 | BGLC | 19 | 4.429 | 7.168-202.486  | 1.00 | 0.00 | CARA |
| ATOM | 396 | C1  | BGLC | 20 | 3.207 | 10.243-204.683 | 1.00 | 2.00 | CARA |
| ATOM | 397 | H1  | BGLC | 20 | 3.877 | 11.089-204.588 | 1.00 | 0.00 | CARA |
| ATOM | 398 | C5  | BGLC | 20 | 2.073 | 11.424-206.413 | 1.00 | 2.00 | CARA |
| ATOM | 399 | H5  | BGLC | 20 | 2.800 | 12.254-206.304 | 1.00 | 0.00 | CARA |
| ATOM | 400 | O5  | BGLC | 20 | 1.954 | 10.678-205.187 | 1.00 | 2.00 | CARA |
| ATOM | 401 | C2  | BGLC | 20 | 3.829 | 9.243-205.666  | 1.00 | 2.00 | CARA |
| ATOM | 402 | H2  | BGLC | 20 | 3.254 | 8.262-205.688  | 1.00 | 0.00 | CARA |
| ATOM | 403 | O2  | BGLC | 20 | 5.125 | 8.955-205.133  | 1.00 | 2.00 | CARA |
| ATOM | 404 | HO2 | BGLC | 20 | 5.391 | 8.040-205.121  | 1.00 | 0.00 | CARA |
| ATOM | 405 | C3  | BGLC | 20 | 3.936 | 9.840-207.049  | 1.00 | 2.00 | CARA |
| ATOM | 406 | H3  | BGLC | 20 | 4.659 | 10.654-207.005 | 1.00 | 0.00 | CARA |
| ATOM | 407 | O3  | BGLC | 20 | 4.282 | 8.806-207.994  | 1.00 | 2.00 | CARA |
| ATOM | 408 | HO3 | BGLC | 20 | 5.147 | 8.427-208.002  | 1.00 | 0.00 | CARA |
| ATOM | 409 | C4  | BGLC | 20 | 2.650 | 10.534-207.467 | 1.00 | 2.00 | CARA |
| ATOM | 410 | H4  | BGLC | 20 | 1.898 | 9.806-207.757  | 1.00 | 0.00 | CARA |
| ATOM | 411 | O4  | BGLC | 20 | 2.821 | 11.280-208.688 | 1.00 | 2.00 | CARA |
| ATOM | 412 | HO4 | BGLC | 20 | 3.284 | 10.713-209.356 | 1.00 | 0.00 | CARA |
| ATOM | 413 | C6  | BGLC | 20 | 0.687 | 11.949-206.721 | 1.00 | 2.00 | CARA |
| ATOM | 414 | H61 | BGLC | 20 | 0.163 | 11.043-207.190 | 1.00 | 0.00 | CARA |
| ATOM | 415 | H62 | BGLC | 20 | 0.042 | 12.214-205.889 | 1.00 | 0.00 | CARA |
| ATOM | 416 | O6  | BGLC | 20 | 0.742 | 12.895-207.773 | 1.00 | 2.00 | CARA |
| ATOM | 417 | HO6 | BGLC | 20 | 1.327 | 13.642-207.689 | 1.00 | 0.00 | CARA |
| ATOM | 418 | C1  | BGLC | 1  | 8.586 | 5.170-106.065  | 1.00 | 2.00 | CARB |
| ATOM | 419 | H1  | BGLC | 1  | 7.827 | 4.409-105.932  | 1.00 | 0.00 | CARB |
| ATOM | 420 | O1  | BGLC | 1  | 8.864 | 5.891-104.879  | 1.00 | 2.00 | CARB |
| ATOM | 421 | HO1 | BGLC | 1  | 9.250 | 6.698-105.144  | 1.00 | 0.00 | CARB |
| ATOM | 422 | C5  | BGLC | 1  | 9.719 | 3.983-107.791  | 1.00 | 2.00 | CARB |
| ATOM | 423 | H5  | BGLC | 1  | 8.993 | 3.152-107.677  | 1.00 | 0.00 | CARB |
| ATOM | 424 | O5  | BGLC | 1  | 9.839 | 4.734-106.569  | 1.00 | 2.00 | CARB |
| ATOM | 425 | C2  | BGLC | 1  | 7.964 | 6.168-107.052  | 1.00 | 2.00 | CARB |
| ATOM | 426 | H2  | BGLC | 1  | 8.538 | 7.149-107.080  | 1.00 | 0.00 | CARB |
| ATOM | 427 | O2  | BGLC | 1  | 6.669 | 6.457-106.519  | 1.00 | 2.00 | CARB |
| ATOM | 428 | HO2 | BGLC | 1  | 6.403 | 7.372-106.509  | 1.00 | 0.00 | CARB |
| ATOM | 429 | C3  | BGLC | 1  | 7.855 | 5.564-108.432  | 1.00 | 2.00 | CARB |
| ATOM | 430 | H3  | BGLC | 1  | 7.132 | 4.751-108.384  | 1.00 | 0.00 | CARB |



|      |     |     |      |   |        |               |      |      |      |
|------|-----|-----|------|---|--------|---------------|------|------|------|
| ATOM | 431 | O3  | BGLC | 1 | 7.510  | 6.594-109.380 | 1.00 | 2.00 | CARB |
| ATOM | 432 | HO3 | BGLC | 1 | 6.646  | 6.975-109.389 | 1.00 | 0.00 | CARB |
| ATOM | 433 | C4  | BGLC | 1 | 9.140  | 4.868-108.849 | 1.00 | 2.00 | CARB |
| ATOM | 434 | H4  | BGLC | 1 | 9.854  | 5.655-109.072 | 1.00 | 0.00 | CARB |
| ATOM | 435 | O4  | BGLC | 1 | 9.076  | 4.210-110.075 | 1.00 | 2.00 | CARB |
| ATOM | 436 | C6  | BGLC | 1 | 11.106 | 3.459-108.099 | 1.00 | 2.00 | CARB |
| ATOM | 437 | H61 | BGLC | 1 | 11.628 | 4.362-108.575 | 1.00 | 0.00 | CARB |
| ATOM | 438 | H62 | BGLC | 1 | 11.753 | 3.200-107.267 | 1.00 | 0.00 | CARB |
| ATOM | 439 | O6  | BGLC | 1 | 11.049 | 2.507-109.147 | 1.00 | 2.00 | CARB |
| ATOM | 440 | HO6 | BGLC | 1 | 10.465 | 1.760-109.057 | 1.00 | 0.00 | CARB |
| ATOM | 441 | C1  | BGLC | 2 | 9.245  | 4.836-111.255 | 1.00 | 2.00 | CARB |
| ATOM | 442 | H1  | BGLC | 2 | 9.914  | 5.683-111.159 | 1.00 | 0.00 | CARB |
| ATOM | 443 | C5  | BGLC | 2 | 8.111  | 6.016-112.984 | 1.00 | 2.00 | CARB |
| ATOM | 444 | H5  | BGLC | 2 | 8.837  | 6.847-112.873 | 1.00 | 0.00 | CARB |
| ATOM | 445 | O5  | BGLC | 2 | 7.992  | 5.269-111.759 | 1.00 | 2.00 | CARB |
| ATOM | 446 | C2  | BGLC | 2 | 9.867  | 3.834-112.238 | 1.00 | 2.00 | CARB |
| ATOM | 447 | H2  | BGLC | 2 | 9.292  | 2.853-112.260 | 1.00 | 0.00 | CARB |
| ATOM | 448 | O2  | BGLC | 2 | 11.162 | 3.547-111.705 | 1.00 | 2.00 | CARB |
| ATOM | 449 | HO2 | BGLC | 2 | 11.428 | 2.632-111.692 | 1.00 | 0.00 | CARB |
| ATOM | 450 | C3  | BGLC | 2 | 9.974  | 4.431-113.621 | 1.00 | 2.00 | CARB |
| ATOM | 451 | H3  | BGLC | 2 | 10.698 | 5.244-113.577 | 1.00 | 0.00 | CARB |
| ATOM | 452 | O3  | BGLC | 2 | 10.318 | 3.398-114.565 | 1.00 | 2.00 | CARB |
| ATOM | 453 | HO3 | BGLC | 2 | 11.182 | 3.018-114.573 | 1.00 | 0.00 | CARB |
| ATOM | 454 | C4  | BGLC | 2 | 8.688  | 5.126-114.039 | 1.00 | 2.00 | CARB |
| ATOM | 455 | H4  | BGLC | 2 | 7.973  | 4.339-114.259 | 1.00 | 0.00 | CARB |
| ATOM | 456 | O4  | BGLC | 2 | 8.752  | 5.781-115.268 | 1.00 | 2.00 | CARB |
| ATOM | 457 | C6  | BGLC | 2 | 6.724  | 6.539-113.293 | 1.00 | 2.00 | CARB |
| ATOM | 458 | H61 | BGLC | 2 | 6.202  | 5.633-113.764 | 1.00 | 0.00 | CARB |
| ATOM | 459 | H62 | BGLC | 2 | 6.078  | 6.802-112.462 | 1.00 | 0.00 | CARB |
| ATOM | 460 | O6  | BGLC | 2 | 6.780  | 7.486-114.345 | 1.00 | 2.00 | CARB |
| ATOM | 461 | HO6 | BGLC | 2 | 7.364  | 8.233-114.259 | 1.00 | 0.00 | CARB |
| ATOM | 462 | C1  | BGLC | 3 | 8.581  | 5.149-116.445 | 1.00 | 2.00 | CARB |
| ATOM | 463 | H1  | BGLC | 3 | 7.912  | 4.302-116.344 | 1.00 | 0.00 | CARB |
| ATOM | 464 | C5  | BGLC | 3 | 9.716  | 3.963-118.171 | 1.00 | 2.00 | CARB |
| ATOM | 465 | H5  | BGLC | 3 | 8.990  | 3.132-118.057 | 1.00 | 0.00 | CARB |
| ATOM | 466 | O5  | BGLC | 3 | 9.835  | 4.714-116.949 | 1.00 | 2.00 | CARB |
| ATOM | 467 | C2  | BGLC | 3 | 7.959  | 6.148-117.432 | 1.00 | 2.00 | CARB |
| ATOM | 468 | H2  | BGLC | 3 | 8.532  | 7.130-117.459 | 1.00 | 0.00 | CARB |
| ATOM | 469 | O2  | BGLC | 3 | 6.665  | 6.436-116.899 | 1.00 | 2.00 | CARB |
| ATOM | 470 | HO2 | BGLC | 3 | 6.399  | 7.351-116.888 | 1.00 | 0.00 | CARB |
| ATOM | 471 | C3  | BGLC | 3 | 7.851  | 5.544-118.812 | 1.00 | 2.00 | CARB |
| ATOM | 472 | H3  | BGLC | 3 | 7.127  | 4.731-118.763 | 1.00 | 0.00 | CARB |
| ATOM | 473 | O3  | BGLC | 3 | 7.505  | 6.573-119.760 | 1.00 | 2.00 | CARB |
| ATOM | 474 | HO3 | BGLC | 3 | 6.641  | 6.953-119.769 | 1.00 | 0.00 | CARB |
| ATOM | 475 | C4  | BGLC | 3 | 9.135  | 4.847-119.229 | 1.00 | 2.00 | CARB |
| ATOM | 476 | H4  | BGLC | 3 | 9.847  | 5.635-119.453 | 1.00 | 0.00 | CARB |
| ATOM | 477 | O4  | BGLC | 3 | 9.071  | 4.190-120.455 | 1.00 | 2.00 | CARB |
| ATOM | 478 | C6  | BGLC | 3 | 11.101 | 3.439-118.479 | 1.00 | 2.00 | CARB |
| ATOM | 479 | H61 | BGLC | 3 | 11.622 | 4.342-118.956 | 1.00 | 0.00 | CARB |
| ATOM | 480 | H62 | BGLC | 3 | 11.749 | 3.181-117.647 | 1.00 | 0.00 | CARB |
| ATOM | 481 | O6  | BGLC | 3 | 11.044 | 2.485-119.527 | 1.00 | 2.00 | CARB |
| ATOM | 482 | HO6 | BGLC | 3 | 10.460 | 1.738-119.437 | 1.00 | 0.00 | CARB |
| ATOM | 483 | C1  | BGLC | 4 | 9.240  | 4.815-121.635 | 1.00 | 2.00 | CARB |
| ATOM | 484 | H1  | BGLC | 4 | 9.910  | 5.662-121.540 | 1.00 | 0.00 | CARB |

|      |     |     |      |   |        |               |      |      |      |
|------|-----|-----|------|---|--------|---------------|------|------|------|
| ATOM | 485 | C5  | BGLC | 4 | 8.106  | 5.996-123.364 | 1.00 | 2.00 | CARB |
| ATOM | 486 | H5  | BGLC | 4 | 8.831  | 6.828-123.253 | 1.00 | 0.00 | CARB |
| ATOM | 487 | O5  | BGLC | 4 | 7.987  | 5.249-122.139 | 1.00 | 2.00 | CARB |
| ATOM | 488 | C2  | BGLC | 4 | 9.862  | 3.813-122.618 | 1.00 | 2.00 | CARB |
| ATOM | 489 | H2  | BGLC | 4 | 9.288  | 2.831-122.640 | 1.00 | 0.00 | CARB |
| ATOM | 490 | O2  | BGLC | 4 | 11.157 | 3.526-122.085 | 1.00 | 2.00 | CARB |
| ATOM | 491 | HO2 | BGLC | 4 | 11.423 | 2.611-122.072 | 1.00 | 0.00 | CARB |
| ATOM | 492 | C3  | BGLC | 4 | 9.969  | 4.411-124.001 | 1.00 | 2.00 | CARB |
| ATOM | 493 | H3  | BGLC | 4 | 10.693 | 5.224-123.957 | 1.00 | 0.00 | CARB |
| ATOM | 494 | O3  | BGLC | 4 | 10.313 | 3.378-124.945 | 1.00 | 2.00 | CARB |
| ATOM | 495 | HO3 | BGLC | 4 | 11.177 | 2.998-124.953 | 1.00 | 0.00 | CARB |
| ATOM | 496 | C4  | BGLC | 4 | 8.685  | 5.105-124.419 | 1.00 | 2.00 | CARB |
| ATOM | 497 | H4  | BGLC | 4 | 7.971  | 4.317-124.638 | 1.00 | 0.00 | CARB |
| ATOM | 498 | O4  | BGLC | 4 | 8.747  | 5.760-125.648 | 1.00 | 2.00 | CARB |
| ATOM | 499 | C6  | BGLC | 4 | 6.720  | 6.518-123.673 | 1.00 | 2.00 | CARB |
| ATOM | 500 | H61 | BGLC | 4 | 6.198  | 5.612-124.144 | 1.00 | 0.00 | CARB |
| ATOM | 501 | H62 | BGLC | 4 | 6.073  | 6.780-122.842 | 1.00 | 0.00 | CARB |
| ATOM | 502 | O6  | BGLC | 4 | 6.775  | 7.466-124.725 | 1.00 | 2.00 | CARB |
| ATOM | 503 | HO6 | BGLC | 4 | 7.358  | 8.214-124.639 | 1.00 | 0.00 | CARB |
| ATOM | 504 | C1  | BGLC | 5 | 8.578  | 5.129-126.825 | 1.00 | 2.00 | CARB |
| ATOM | 505 | H1  | BGLC | 5 | 7.908  | 4.283-126.726 | 1.00 | 0.00 | CARB |
| ATOM | 506 | C5  | BGLC | 5 | 9.711  | 3.941-128.551 | 1.00 | 2.00 | CARB |
| ATOM | 507 | H5  | BGLC | 5 | 8.985  | 3.110-128.437 | 1.00 | 0.00 | CARB |
| ATOM | 508 | O5  | BGLC | 5 | 9.830  | 4.692-127.329 | 1.00 | 2.00 | CARB |
| ATOM | 509 | C2  | BGLC | 5 | 7.955  | 6.126-127.812 | 1.00 | 2.00 | CARB |
| ATOM | 510 | H2  | BGLC | 5 | 8.530  | 7.107-127.838 | 1.00 | 0.00 | CARB |
| ATOM | 511 | O2  | BGLC | 5 | 6.660  | 6.416-127.279 | 1.00 | 2.00 | CARB |
| ATOM | 512 | HO2 | BGLC | 5 | 6.394  | 7.331-127.270 | 1.00 | 0.00 | CARB |
| ATOM | 513 | C3  | BGLC | 5 | 7.847  | 5.523-129.192 | 1.00 | 2.00 | CARB |
| ATOM | 514 | H3  | BGLC | 5 | 7.123  | 4.710-129.144 | 1.00 | 0.00 | CARB |
| ATOM | 515 | O3  | BGLC | 5 | 7.501  | 6.553-130.140 | 1.00 | 2.00 | CARB |
| ATOM | 516 | HO3 | BGLC | 5 | 6.637  | 6.933-130.149 | 1.00 | 0.00 | CARB |
| ATOM | 517 | C4  | BGLC | 5 | 9.131  | 4.827-129.609 | 1.00 | 2.00 | CARB |
| ATOM | 518 | H4  | BGLC | 5 | 9.844  | 5.615-129.832 | 1.00 | 0.00 | CARB |
| ATOM | 519 | O4  | BGLC | 5 | 9.068  | 4.168-130.835 | 1.00 | 2.00 | CARB |
| ATOM | 520 | C6  | BGLC | 5 | 11.096 | 3.417-128.859 | 1.00 | 2.00 | CARB |
| ATOM | 521 | O61 | BGLC | 5 | 11.116 | 2.002-128.903 | 1.00 | 0.00 | CARB |
| ATOM | 522 | O62 | BGLC | 5 | 11.774 | 4.267-128.979 | 1.00 | 0.00 | CARB |
| ATOM | 523 | C1  | BGLC | 6 | 9.236  | 4.794-132.014 | 1.00 | 2.00 | CARB |
| ATOM | 524 | H1  | BGLC | 6 | 9.905  | 5.641-131.918 | 1.00 | 0.00 | CARB |
| ATOM | 525 | C5  | BGLC | 6 | 8.101  | 5.975-133.744 | 1.00 | 2.00 | CARB |
| ATOM | 526 | H5  | BGLC | 6 | 8.827  | 6.806-133.633 | 1.00 | 0.00 | CARB |
| ATOM | 527 | O5  | BGLC | 6 | 7.982  | 5.228-132.519 | 1.00 | 2.00 | CARB |
| ATOM | 528 | C2  | BGLC | 6 | 9.857  | 3.792-132.998 | 1.00 | 2.00 | CARB |
| ATOM | 529 | H2  | BGLC | 6 | 9.282  | 2.811-133.021 | 1.00 | 0.00 | CARB |
| ATOM | 530 | O2  | BGLC | 6 | 11.152 | 3.504-132.465 | 1.00 | 2.00 | CARB |
| ATOM | 531 | HO2 | BGLC | 6 | 11.418 | 2.589-132.452 | 1.00 | 0.00 | CARB |
| ATOM | 532 | C3  | BGLC | 6 | 9.965  | 4.390-134.381 | 1.00 | 2.00 | CARB |
| ATOM | 533 | H3  | BGLC | 6 | 10.689 | 5.203-134.337 | 1.00 | 0.00 | CARB |
| ATOM | 534 | O3  | BGLC | 6 | 10.310 | 3.357-135.325 | 1.00 | 2.00 | CARB |
| ATOM | 535 | HO3 | BGLC | 6 | 11.174 | 2.977-135.333 | 1.00 | 0.00 | CARB |
| ATOM | 536 | C4  | BGLC | 6 | 8.680  | 5.085-134.799 | 1.00 | 2.00 | CARB |
| ATOM | 537 | H4  | BGLC | 6 | 7.966  | 4.297-135.018 | 1.00 | 0.00 | CARB |
| ATOM | 538 | O4  | BGLC | 6 | 8.743  | 5.739-136.028 | 1.00 | 2.00 | CARB |

|      |     |     |      |   |        |               |      |      |      |
|------|-----|-----|------|---|--------|---------------|------|------|------|
| ATOM | 539 | C6  | BGLC | 6 | 6.715  | 6.498-134.053 | 1.00 | 2.00 | CARB |
| ATOM | 540 | H61 | BGLC | 6 | 6.192  | 5.592-134.524 | 1.00 | 0.00 | CARB |
| ATOM | 541 | H62 | BGLC | 6 | 6.069  | 6.761-133.222 | 1.00 | 0.00 | CARB |
| ATOM | 542 | O6  | BGLC | 6 | 6.771  | 7.445-135.105 | 1.00 | 2.00 | CARB |
| ATOM | 543 | HO6 | BGLC | 6 | 7.355  | 8.192-135.019 | 1.00 | 0.00 | CARB |
| ATOM | 544 | C1  | BGLC | 7 | 8.573  | 5.108-137.205 | 1.00 | 2.00 | CARB |
| ATOM | 545 | H1  | BGLC | 7 | 7.904  | 4.262-137.105 | 1.00 | 0.00 | CARB |
| ATOM | 546 | C5  | BGLC | 7 | 9.706  | 3.920-138.931 | 1.00 | 2.00 | CARB |
| ATOM | 547 | H5  | BGLC | 7 | 8.981  | 3.089-138.817 | 1.00 | 0.00 | CARB |
| ATOM | 548 | O5  | BGLC | 7 | 9.825  | 4.672-137.709 | 1.00 | 2.00 | CARB |
| ATOM | 549 | C2  | BGLC | 7 | 7.951  | 6.106-138.192 | 1.00 | 2.00 | CARB |
| ATOM | 550 | H2  | BGLC | 7 | 8.525  | 7.088-138.219 | 1.00 | 0.00 | CARB |
| ATOM | 551 | O2  | BGLC | 7 | 6.656  | 6.394-137.659 | 1.00 | 2.00 | CARB |
| ATOM | 552 | HO2 | BGLC | 7 | 6.389  | 7.309-137.649 | 1.00 | 0.00 | CARB |
| ATOM | 553 | C3  | BGLC | 7 | 7.842  | 5.503-139.572 | 1.00 | 2.00 | CARB |
| ATOM | 554 | H3  | BGLC | 7 | 7.118  | 4.690-139.524 | 1.00 | 0.00 | CARB |
| ATOM | 555 | O3  | BGLC | 7 | 7.497  | 6.532-140.520 | 1.00 | 2.00 | CARB |
| ATOM | 556 | HO3 | BGLC | 7 | 6.633  | 6.912-140.529 | 1.00 | 0.00 | CARB |
| ATOM | 557 | C4  | BGLC | 7 | 9.127  | 4.805-139.988 | 1.00 | 2.00 | CARB |
| ATOM | 558 | H4  | BGLC | 7 | 9.840  | 5.592-140.211 | 1.00 | 0.00 | CARB |
| ATOM | 559 | O4  | BGLC | 7 | 9.063  | 4.147-141.215 | 1.00 | 2.00 | CARB |
| ATOM | 560 | C6  | BGLC | 7 | 11.092 | 3.396-139.239 | 1.00 | 2.00 | CARB |
| ATOM | 561 | H61 | BGLC | 7 | 11.614 | 4.300-139.714 | 1.00 | 0.00 | CARB |
| ATOM | 562 | H62 | BGLC | 7 | 11.739 | 3.136-138.407 | 1.00 | 0.00 | CARB |
| ATOM | 563 | O6  | BGLC | 7 | 11.035 | 2.445-140.287 | 1.00 | 2.00 | CARB |
| ATOM | 564 | HO6 | BGLC | 7 | 10.451 | 1.698-140.198 | 1.00 | 0.00 | CARB |
| ATOM | 565 | C1  | BGLC | 8 | 9.231  | 4.774-142.394 | 1.00 | 2.00 | CARB |
| ATOM | 566 | H1  | BGLC | 8 | 9.900  | 5.621-142.298 | 1.00 | 0.00 | CARB |
| ATOM | 567 | C5  | BGLC | 8 | 8.097  | 5.955-144.124 | 1.00 | 2.00 | CARB |
| ATOM | 568 | H5  | BGLC | 8 | 8.822  | 6.787-144.013 | 1.00 | 0.00 | CARB |
| ATOM | 569 | O5  | BGLC | 8 | 7.978  | 5.208-142.899 | 1.00 | 2.00 | CARB |
| ATOM | 570 | C2  | BGLC | 8 | 9.853  | 3.772-143.378 | 1.00 | 2.00 | CARB |
| ATOM | 571 | H2  | BGLC | 8 | 9.279  | 2.790-143.400 | 1.00 | 0.00 | CARB |
| ATOM | 572 | O2  | BGLC | 8 | 11.148 | 3.485-142.845 | 1.00 | 2.00 | CARB |
| ATOM | 573 | HO2 | BGLC | 8 | 11.414 | 2.570-142.832 | 1.00 | 0.00 | CARB |
| ATOM | 574 | C3  | BGLC | 8 | 9.960  | 4.370-144.761 | 1.00 | 2.00 | CARB |
| ATOM | 575 | H3  | BGLC | 8 | 10.683 | 5.183-144.717 | 1.00 | 0.00 | CARB |
| ATOM | 576 | O3  | BGLC | 8 | 10.305 | 3.336-145.705 | 1.00 | 2.00 | CARB |
| ATOM | 577 | HO3 | BGLC | 8 | 11.169 | 2.956-145.713 | 1.00 | 0.00 | CARB |
| ATOM | 578 | C4  | BGLC | 8 | 8.675  | 5.064-145.179 | 1.00 | 2.00 | CARB |
| ATOM | 579 | H4  | BGLC | 8 | 7.961  | 4.276-145.398 | 1.00 | 0.00 | CARB |
| ATOM | 580 | O4  | BGLC | 8 | 8.738  | 5.718-146.408 | 1.00 | 2.00 | CARB |
| ATOM | 581 | C6  | BGLC | 8 | 6.710  | 6.477-144.433 | 1.00 | 2.00 | CARB |
| ATOM | 582 | H61 | BGLC | 8 | 6.188  | 5.571-144.905 | 1.00 | 0.00 | CARB |
| ATOM | 583 | H62 | BGLC | 8 | 6.063  | 6.739-143.602 | 1.00 | 0.00 | CARB |
| ATOM | 584 | O6  | BGLC | 8 | 6.766  | 7.425-145.485 | 1.00 | 2.00 | CARB |
| ATOM | 585 | HO6 | BGLC | 8 | 7.350  | 8.172-145.399 | 1.00 | 0.00 | CARB |
| ATOM | 586 | C1  | BGLC | 9 | 8.569  | 5.087-147.585 | 1.00 | 2.00 | CARB |
| ATOM | 587 | H1  | BGLC | 9 | 7.900  | 4.241-147.486 | 1.00 | 0.00 | CARB |
| ATOM | 588 | C5  | BGLC | 9 | 9.702  | 3.899-149.311 | 1.00 | 2.00 | CARB |
| ATOM | 589 | H5  | BGLC | 9 | 8.976  | 3.068-149.197 | 1.00 | 0.00 | CARB |
| ATOM | 590 | O5  | BGLC | 9 | 9.822  | 4.651-148.088 | 1.00 | 2.00 | CARB |
| ATOM | 591 | C2  | BGLC | 9 | 7.946  | 6.085-148.572 | 1.00 | 2.00 | CARB |
| ATOM | 592 | H2  | BGLC | 9 | 8.519  | 7.067-148.599 | 1.00 | 0.00 | CARB |

|      |     |     |      |    |        |               |      |      |      |
|------|-----|-----|------|----|--------|---------------|------|------|------|
| ATOM | 593 | O2  | BGLC | 9  | 6.652  | 6.373-148.039 | 1.00 | 2.00 | CARB |
| ATOM | 594 | HO2 | BGLC | 9  | 6.385  | 7.288-148.029 | 1.00 | 0.00 | CARB |
| ATOM | 595 | C3  | BGLC | 9  | 7.838  | 5.481-149.952 | 1.00 | 2.00 | CARB |
| ATOM | 596 | H3  | BGLC | 9  | 7.115  | 4.667-149.906 | 1.00 | 0.00 | CARB |
| ATOM | 597 | O3  | BGLC | 9  | 7.493  | 6.512-150.900 | 1.00 | 2.00 | CARB |
| ATOM | 598 | HO3 | BGLC | 9  | 6.629  | 6.892-150.909 | 1.00 | 0.00 | CARB |
| ATOM | 599 | C4  | BGLC | 9  | 9.123  | 4.786-150.368 | 1.00 | 2.00 | CARB |
| ATOM | 600 | H4  | BGLC | 9  | 9.837  | 5.573-150.591 | 1.00 | 0.00 | CARB |
| ATOM | 601 | O4  | BGLC | 9  | 9.058  | 4.127-151.595 | 1.00 | 2.00 | CARB |
| ATOM | 602 | C6  | BGLC | 9  | 11.087 | 3.376-149.618 | 1.00 | 2.00 | CARB |
| ATOM | 603 | O61 | BGLC | 9  | 11.108 | 1.961-149.664 | 1.00 | 0.00 | CARB |
| ATOM | 604 | O62 | BGLC | 9  | 11.765 | 4.226-149.736 | 1.00 | 0.00 | CARB |
| ATOM | 605 | C1  | BGLC | 10 | 9.226  | 4.753-152.774 | 1.00 | 2.00 | CARB |
| ATOM | 606 | H1  | BGLC | 10 | 9.895  | 5.600-152.679 | 1.00 | 0.00 | CARB |
| ATOM | 607 | C5  | BGLC | 10 | 8.092  | 5.934-154.504 | 1.00 | 2.00 | CARB |
| ATOM | 608 | H5  | BGLC | 10 | 8.817  | 6.766-154.394 | 1.00 | 0.00 | CARB |
| ATOM | 609 | O5  | BGLC | 10 | 7.974  | 5.187-153.279 | 1.00 | 2.00 | CARB |
| ATOM | 610 | C2  | BGLC | 10 | 9.848  | 3.751-153.758 | 1.00 | 2.00 | CARB |
| ATOM | 611 | H2  | BGLC | 10 | 9.273  | 2.770-153.780 | 1.00 | 0.00 | CARB |
| ATOM | 612 | O2  | BGLC | 10 | 11.144 | 3.463-153.225 | 1.00 | 2.00 | CARB |
| ATOM | 613 | HO2 | BGLC | 10 | 11.410 | 2.548-153.212 | 1.00 | 0.00 | CARB |
| ATOM | 614 | C3  | BGLC | 10 | 9.955  | 4.349-155.141 | 1.00 | 2.00 | CARB |
| ATOM | 615 | H3  | BGLC | 10 | 10.679 | 5.162-155.096 | 1.00 | 0.00 | CARB |
| ATOM | 616 | O3  | BGLC | 10 | 10.300 | 3.316-156.085 | 1.00 | 2.00 | CARB |
| ATOM | 617 | HO3 | BGLC | 10 | 11.164 | 2.936-156.093 | 1.00 | 0.00 | CARB |
| ATOM | 618 | C4  | BGLC | 10 | 8.671  | 5.044-155.559 | 1.00 | 2.00 | CARB |
| ATOM | 619 | H4  | BGLC | 10 | 7.958  | 4.255-155.778 | 1.00 | 0.00 | CARB |
| ATOM | 620 | O4  | BGLC | 10 | 8.734  | 5.696-156.788 | 1.00 | 2.00 | CARB |
| ATOM | 621 | C6  | BGLC | 10 | 6.706  | 6.456-154.813 | 1.00 | 2.00 | CARB |
| ATOM | 622 | H61 | BGLC | 10 | 6.184  | 5.550-155.285 | 1.00 | 0.00 | CARB |
| ATOM | 623 | H62 | BGLC | 10 | 6.059  | 6.718-153.982 | 1.00 | 0.00 | CARB |
| ATOM | 624 | O6  | BGLC | 10 | 6.762  | 7.404-155.865 | 1.00 | 2.00 | CARB |
| ATOM | 625 | HO6 | BGLC | 10 | 7.346  | 8.151-155.779 | 1.00 | 0.00 | CARB |
| ATOM | 626 | C1  | BGLC | 11 | 8.564  | 5.066-157.965 | 1.00 | 2.00 | CARB |
| ATOM | 627 | H1  | BGLC | 11 | 7.894  | 4.220-157.866 | 1.00 | 0.00 | CARB |
| ATOM | 628 | C5  | BGLC | 11 | 9.698  | 3.878-159.691 | 1.00 | 2.00 | CARB |
| ATOM | 629 | H5  | BGLC | 11 | 8.973  | 3.046-159.577 | 1.00 | 0.00 | CARB |
| ATOM | 630 | O5  | BGLC | 11 | 9.817  | 4.630-158.468 | 1.00 | 2.00 | CARB |
| ATOM | 631 | C2  | BGLC | 11 | 7.942  | 6.064-158.952 | 1.00 | 2.00 | CARB |
| ATOM | 632 | H2  | BGLC | 11 | 8.516  | 7.045-158.980 | 1.00 | 0.00 | CARB |
| ATOM | 633 | O2  | BGLC | 11 | 6.648  | 6.353-158.419 | 1.00 | 2.00 | CARB |
| ATOM | 634 | HO2 | BGLC | 11 | 6.382  | 7.268-158.409 | 1.00 | 0.00 | CARB |
| ATOM | 635 | C3  | BGLC | 11 | 7.833  | 5.460-160.332 | 1.00 | 2.00 | CARB |
| ATOM | 636 | H3  | BGLC | 11 | 7.109  | 4.647-160.285 | 1.00 | 0.00 | CARB |
| ATOM | 637 | O3  | BGLC | 11 | 7.488  | 6.491-161.280 | 1.00 | 2.00 | CARB |
| ATOM | 638 | HO3 | BGLC | 11 | 6.624  | 6.872-161.288 | 1.00 | 0.00 | CARB |
| ATOM | 639 | C4  | BGLC | 11 | 9.118  | 4.764-160.748 | 1.00 | 2.00 | CARB |
| ATOM | 640 | H4  | BGLC | 11 | 9.831  | 5.551-160.971 | 1.00 | 0.00 | CARB |
| ATOM | 641 | O4  | BGLC | 11 | 9.053  | 4.106-161.975 | 1.00 | 2.00 | CARB |
| ATOM | 642 | C6  | BGLC | 11 | 11.083 | 3.356-159.998 | 1.00 | 2.00 | CARB |
| ATOM | 643 | H61 | BGLC | 11 | 11.605 | 4.259-160.474 | 1.00 | 0.00 | CARB |
| ATOM | 644 | H62 | BGLC | 11 | 11.730 | 3.098-159.166 | 1.00 | 0.00 | CARB |
| ATOM | 645 | O6  | BGLC | 11 | 11.026 | 2.403-161.047 | 1.00 | 2.00 | CARB |
| ATOM | 646 | HO6 | BGLC | 11 | 10.442 | 1.656-160.957 | 1.00 | 0.00 | CARB |

|      |     |     |      |    |        |               |      |      |      |
|------|-----|-----|------|----|--------|---------------|------|------|------|
| ATOM | 647 | C1  | BGLC | 12 | 9.223  | 4.733-163.154 | 1.00 | 2.00 | CARB |
| ATOM | 648 | H1  | BGLC | 12 | 9.892  | 5.580-163.057 | 1.00 | 0.00 | CARB |
| ATOM | 649 | C5  | BGLC | 12 | 8.087  | 5.912-164.884 | 1.00 | 2.00 | CARB |
| ATOM | 650 | H5  | BGLC | 12 | 8.813  | 6.744-164.774 | 1.00 | 0.00 | CARB |
| ATOM | 651 | O5  | BGLC | 12 | 7.969  | 5.166-163.659 | 1.00 | 2.00 | CARB |
| ATOM | 652 | C2  | BGLC | 12 | 9.844  | 3.731-164.138 | 1.00 | 2.00 | CARB |
| ATOM | 653 | H2  | BGLC | 12 | 9.268  | 2.750-164.159 | 1.00 | 0.00 | CARB |
| ATOM | 654 | O2  | BGLC | 12 | 11.140 | 3.443-163.605 | 1.00 | 2.00 | CARB |
| ATOM | 655 | HO2 | BGLC | 12 | 11.406 | 2.528-163.592 | 1.00 | 0.00 | CARB |
| ATOM | 656 | C3  | BGLC | 12 | 9.952  | 4.327-165.521 | 1.00 | 2.00 | CARB |
| ATOM | 657 | H3  | BGLC | 12 | 10.676 | 5.140-165.477 | 1.00 | 0.00 | CARB |
| ATOM | 658 | O3  | BGLC | 12 | 10.295 | 3.294-166.465 | 1.00 | 2.00 | CARB |
| ATOM | 659 | HO3 | BGLC | 12 | 11.159 | 2.913-166.473 | 1.00 | 0.00 | CARB |
| ATOM | 660 | C4  | BGLC | 12 | 8.666  | 5.023-165.939 | 1.00 | 2.00 | CARB |
| ATOM | 661 | H4  | BGLC | 12 | 7.953  | 4.234-166.159 | 1.00 | 0.00 | CARB |
| ATOM | 662 | O4  | BGLC | 12 | 8.729  | 5.676-167.168 | 1.00 | 2.00 | CARB |
| ATOM | 663 | C6  | BGLC | 12 | 6.701  | 6.435-165.193 | 1.00 | 2.00 | CARB |
| ATOM | 664 | H61 | BGLC | 12 | 6.178  | 5.530-165.665 | 1.00 | 0.00 | CARB |
| ATOM | 665 | H62 | BGLC | 12 | 6.054  | 6.698-164.362 | 1.00 | 0.00 | CARB |
| ATOM | 666 | O6  | BGLC | 12 | 6.758  | 7.383-166.245 | 1.00 | 2.00 | CARB |
| ATOM | 667 | HO6 | BGLC | 12 | 7.342  | 8.130-166.159 | 1.00 | 0.00 | CARB |
| ATOM | 668 | C1  | BGLC | 13 | 8.560  | 5.045-168.345 | 1.00 | 2.00 | CARB |
| ATOM | 669 | H1  | BGLC | 13 | 7.891  | 4.198-168.246 | 1.00 | 0.00 | CARB |
| ATOM | 670 | C5  | BGLC | 13 | 9.693  | 3.858-170.071 | 1.00 | 2.00 | CARB |
| ATOM | 671 | H5  | BGLC | 13 | 8.967  | 3.027-169.957 | 1.00 | 0.00 | CARB |
| ATOM | 672 | O5  | BGLC | 13 | 9.813  | 4.610-168.848 | 1.00 | 2.00 | CARB |
| ATOM | 673 | C2  | BGLC | 13 | 7.937  | 6.044-169.331 | 1.00 | 2.00 | CARB |
| ATOM | 674 | H2  | BGLC | 13 | 8.512  | 7.025-169.358 | 1.00 | 0.00 | CARB |
| ATOM | 675 | O2  | BGLC | 13 | 6.643  | 6.333-168.799 | 1.00 | 2.00 | CARB |
| ATOM | 676 | HO2 | BGLC | 13 | 6.377  | 7.248-168.789 | 1.00 | 0.00 | CARB |
| ATOM | 677 | C3  | BGLC | 13 | 7.828  | 5.440-170.712 | 1.00 | 2.00 | CARB |
| ATOM | 678 | H3  | BGLC | 13 | 7.104  | 4.627-170.664 | 1.00 | 0.00 | CARB |
| ATOM | 679 | O3  | BGLC | 13 | 7.483  | 6.469-171.660 | 1.00 | 2.00 | CARB |
| ATOM | 680 | HO3 | BGLC | 13 | 6.619  | 6.849-171.669 | 1.00 | 0.00 | CARB |
| ATOM | 681 | C4  | BGLC | 13 | 9.113  | 4.743-171.128 | 1.00 | 2.00 | CARB |
| ATOM | 682 | H4  | BGLC | 13 | 9.825  | 5.531-171.350 | 1.00 | 0.00 | CARB |
| ATOM | 683 | O4  | BGLC | 13 | 9.050  | 4.086-172.355 | 1.00 | 2.00 | CARB |
| ATOM | 684 | C6  | BGLC | 13 | 11.078 | 3.335-170.378 | 1.00 | 2.00 | CARB |
| ATOM | 685 | O61 | BGLC | 13 | 11.099 | 1.920-170.422 | 1.00 | 0.00 | CARB |
| ATOM | 686 | O62 | BGLC | 13 | 11.756 | 4.186-170.498 | 1.00 | 0.00 | CARB |
| ATOM | 687 | C1  | BGLC | 14 | 9.219  | 4.711-173.534 | 1.00 | 2.00 | CARB |
| ATOM | 688 | H1  | BGLC | 14 | 9.888  | 5.558-173.439 | 1.00 | 0.00 | CARB |
| ATOM | 689 | C5  | BGLC | 14 | 8.083  | 5.892-175.264 | 1.00 | 2.00 | CARB |
| ATOM | 690 | H5  | BGLC | 14 | 8.809  | 6.724-175.154 | 1.00 | 0.00 | CARB |
| ATOM | 691 | O5  | BGLC | 14 | 7.965  | 5.145-174.039 | 1.00 | 2.00 | CARB |
| ATOM | 692 | C2  | BGLC | 14 | 9.840  | 3.709-174.518 | 1.00 | 2.00 | CARB |
| ATOM | 693 | H2  | BGLC | 14 | 9.266  | 2.727-174.540 | 1.00 | 0.00 | CARB |
| ATOM | 694 | O2  | BGLC | 14 | 11.136 | 3.422-173.985 | 1.00 | 2.00 | CARB |
| ATOM | 695 | HO2 | BGLC | 14 | 11.402 | 2.507-173.972 | 1.00 | 0.00 | CARB |
| ATOM | 696 | C3  | BGLC | 14 | 9.947  | 4.307-175.901 | 1.00 | 2.00 | CARB |
| ATOM | 697 | H3  | BGLC | 14 | 10.671 | 5.120-175.857 | 1.00 | 0.00 | CARB |
| ATOM | 698 | O3  | BGLC | 14 | 10.291 | 3.274-176.845 | 1.00 | 2.00 | CARB |
| ATOM | 699 | HO3 | BGLC | 14 | 11.155 | 2.894-176.853 | 1.00 | 0.00 | CARB |
| ATOM | 700 | C4  | BGLC | 14 | 8.662  | 5.002-176.319 | 1.00 | 2.00 | CARB |

|      |     |     |      |    |        |               |      |      |      |
|------|-----|-----|------|----|--------|---------------|------|------|------|
| ATOM | 701 | H4  | BGLC | 14 | 7.948  | 4.214-176.538 | 1.00 | 0.00 | CARB |
| ATOM | 702 | O4  | BGLC | 14 | 8.725  | 5.656-177.548 | 1.00 | 2.00 | CARB |
| ATOM | 703 | C6  | BGLC | 14 | 6.698  | 6.415-175.573 | 1.00 | 2.00 | CARB |
| ATOM | 704 | H61 | BGLC | 14 | 6.176  | 5.509-176.043 | 1.00 | 0.00 | CARB |
| ATOM | 705 | H62 | BGLC | 14 | 6.052  | 6.678-174.742 | 1.00 | 0.00 | CARB |
| ATOM | 706 | O6  | BGLC | 14 | 6.753  | 7.362-176.625 | 1.00 | 2.00 | CARB |
| ATOM | 707 | HO6 | BGLC | 14 | 7.337  | 8.109-176.540 | 1.00 | 0.00 | CARB |
| ATOM | 708 | C1  | BGLC | 15 | 8.556  | 5.025-178.725 | 1.00 | 2.00 | CARB |
| ATOM | 709 | H1  | BGLC | 15 | 7.886  | 4.179-178.626 | 1.00 | 0.00 | CARB |
| ATOM | 710 | C5  | BGLC | 15 | 9.689  | 3.837-180.451 | 1.00 | 2.00 | CARB |
| ATOM | 711 | H5  | BGLC | 15 | 8.963  | 3.006-180.338 | 1.00 | 0.00 | CARB |
| ATOM | 712 | O5  | BGLC | 15 | 9.808  | 4.588-179.228 | 1.00 | 2.00 | CARB |
| ATOM | 713 | C2  | BGLC | 15 | 7.932  | 6.023-179.711 | 1.00 | 2.00 | CARB |
| ATOM | 714 | H2  | BGLC | 15 | 8.506  | 7.004-179.737 | 1.00 | 0.00 | CARB |
| ATOM | 715 | O2  | BGLC | 15 | 6.638  | 6.312-179.178 | 1.00 | 2.00 | CARB |
| ATOM | 716 | HO2 | BGLC | 15 | 6.372  | 7.227-179.168 | 1.00 | 0.00 | CARB |
| ATOM | 717 | C3  | BGLC | 15 | 7.824  | 5.420-181.092 | 1.00 | 2.00 | CARB |
| ATOM | 718 | H3  | BGLC | 15 | 7.100  | 4.607-181.043 | 1.00 | 0.00 | CARB |
| ATOM | 719 | O3  | BGLC | 15 | 7.478  | 6.449-182.040 | 1.00 | 2.00 | CARB |
| ATOM | 720 | HO3 | BGLC | 15 | 6.614  | 6.828-182.049 | 1.00 | 0.00 | CARB |
| ATOM | 721 | C4  | BGLC | 15 | 9.108  | 4.723-181.508 | 1.00 | 2.00 | CARB |
| ATOM | 722 | H4  | BGLC | 15 | 9.820  | 5.511-181.731 | 1.00 | 0.00 | CARB |
| ATOM | 723 | O4  | BGLC | 15 | 9.045  | 4.064-182.735 | 1.00 | 2.00 | CARB |
| ATOM | 724 | C6  | BGLC | 15 | 11.073 | 3.314-180.758 | 1.00 | 2.00 | CARB |
| ATOM | 725 | H61 | BGLC | 15 | 11.595 | 4.218-181.232 | 1.00 | 0.00 | CARB |
| ATOM | 726 | H62 | BGLC | 15 | 11.720 | 3.054-179.926 | 1.00 | 0.00 | CARB |
| ATOM | 727 | O6  | BGLC | 15 | 11.018 | 2.362-181.807 | 1.00 | 2.00 | CARB |
| ATOM | 728 | HO6 | BGLC | 15 | 10.435 | 1.615-181.719 | 1.00 | 0.00 | CARB |
| ATOM | 729 | C1  | BGLC | 16 | 9.213  | 4.690-183.914 | 1.00 | 2.00 | CARB |
| ATOM | 730 | H1  | BGLC | 16 | 9.882  | 5.537-183.818 | 1.00 | 0.00 | CARB |
| ATOM | 731 | C5  | BGLC | 16 | 8.078  | 5.872-185.644 | 1.00 | 2.00 | CARB |
| ATOM | 732 | H5  | BGLC | 16 | 8.803  | 6.704-185.533 | 1.00 | 0.00 | CARB |
| ATOM | 733 | O5  | BGLC | 16 | 7.960  | 5.124-184.419 | 1.00 | 2.00 | CARB |
| ATOM | 734 | C2  | BGLC | 16 | 9.834  | 3.688-184.898 | 1.00 | 2.00 | CARB |
| ATOM | 735 | H2  | BGLC | 16 | 9.259  | 2.707-184.921 | 1.00 | 0.00 | CARB |
| ATOM | 736 | O2  | BGLC | 16 | 11.131 | 3.400-184.365 | 1.00 | 2.00 | CARB |
| ATOM | 737 | HO2 | BGLC | 16 | 11.397 | 2.485-184.352 | 1.00 | 0.00 | CARB |
| ATOM | 738 | C3  | BGLC | 16 | 9.942  | 4.286-186.281 | 1.00 | 2.00 | CARB |
| ATOM | 739 | H3  | BGLC | 16 | 10.666 | 5.099-186.236 | 1.00 | 0.00 | CARB |
| ATOM | 740 | O3  | BGLC | 16 | 10.287 | 3.253-187.225 | 1.00 | 2.00 | CARB |
| ATOM | 741 | HO3 | BGLC | 16 | 11.151 | 2.873-187.233 | 1.00 | 0.00 | CARB |
| ATOM | 742 | C4  | BGLC | 16 | 8.657  | 4.982-186.699 | 1.00 | 2.00 | CARB |
| ATOM | 743 | H4  | BGLC | 16 | 7.943  | 4.194-186.918 | 1.00 | 0.00 | CARB |
| ATOM | 744 | O4  | BGLC | 16 | 8.720  | 5.636-187.928 | 1.00 | 2.00 | CARB |
| ATOM | 745 | C6  | BGLC | 16 | 6.693  | 6.394-185.953 | 1.00 | 2.00 | CARB |
| ATOM | 746 | H61 | BGLC | 16 | 6.171  | 5.488-186.424 | 1.00 | 0.00 | CARB |
| ATOM | 747 | H62 | BGLC | 16 | 6.046  | 6.656-185.122 | 1.00 | 0.00 | CARB |
| ATOM | 748 | O6  | BGLC | 16 | 6.748  | 7.342-187.005 | 1.00 | 2.00 | CARB |
| ATOM | 749 | HO6 | BGLC | 16 | 7.331  | 8.090-186.919 | 1.00 | 0.00 | CARB |
| ATOM | 750 | C1  | BGLC | 17 | 8.551  | 5.004-189.105 | 1.00 | 2.00 | CARB |
| ATOM | 751 | H1  | BGLC | 17 | 7.882  | 4.157-189.005 | 1.00 | 0.00 | CARB |
| ATOM | 752 | C5  | BGLC | 17 | 9.684  | 3.816-190.831 | 1.00 | 2.00 | CARB |
| ATOM | 753 | H5  | BGLC | 17 | 8.959  | 2.985-190.717 | 1.00 | 0.00 | CARB |
| ATOM | 754 | O5  | BGLC | 17 | 9.803  | 4.568-189.608 | 1.00 | 2.00 | CARB |

|      |     |     |      |    |        |               |      |      |      |
|------|-----|-----|------|----|--------|---------------|------|------|------|
| ATOM | 755 | C2  | BGLC | 17 | 7.929  | 6.003-190.091 | 1.00 | 2.00 | CARB |
| ATOM | 756 | H2  | BGLC | 17 | 8.504  | 6.984-190.119 | 1.00 | 0.00 | CARB |
| ATOM | 757 | O2  | BGLC | 17 | 6.634  | 6.292-189.558 | 1.00 | 2.00 | CARB |
| ATOM | 758 | HO2 | BGLC | 17 | 6.368  | 7.207-189.547 | 1.00 | 0.00 | CARB |
| ATOM | 759 | C3  | BGLC | 17 | 7.819  | 5.399-191.472 | 1.00 | 2.00 | CARB |
| ATOM | 760 | H3  | BGLC | 17 | 7.095  | 4.586-191.425 | 1.00 | 0.00 | CARB |
| ATOM | 761 | O3  | BGLC | 17 | 7.475  | 6.428-192.420 | 1.00 | 2.00 | CARB |
| ATOM | 762 | HO3 | BGLC | 17 | 6.611  | 6.809-192.429 | 1.00 | 0.00 | CARB |
| ATOM | 763 | C4  | BGLC | 17 | 9.105  | 4.702-191.888 | 1.00 | 2.00 | CARB |
| ATOM | 764 | H4  | BGLC | 17 | 9.819  | 5.489-192.111 | 1.00 | 0.00 | CARB |
| ATOM | 765 | O4  | BGLC | 17 | 9.040  | 4.044-193.115 | 1.00 | 2.00 | CARB |
| ATOM | 766 | C6  | BGLC | 17 | 11.070 | 3.293-191.138 | 1.00 | 2.00 | CARB |
| ATOM | 767 | H61 | BGLC | 17 | 11.592 | 4.196-191.614 | 1.00 | 0.00 | CARB |
| ATOM | 768 | H62 | BGLC | 17 | 11.717 | 3.034-190.306 | 1.00 | 0.00 | CARB |
| ATOM | 769 | O6  | BGLC | 17 | 11.013 | 2.341-192.186 | 1.00 | 2.00 | CARB |
| ATOM | 770 | HO6 | BGLC | 17 | 10.429 | 1.594-192.096 | 1.00 | 0.00 | CARB |
| ATOM | 771 | C1  | BGLC | 18 | 9.209  | 4.670-194.294 | 1.00 | 2.00 | CARB |
| ATOM | 772 | H1  | BGLC | 18 | 9.878  | 5.517-194.198 | 1.00 | 0.00 | CARB |
| ATOM | 773 | C5  | BGLC | 18 | 8.075  | 5.851-196.024 | 1.00 | 2.00 | CARB |
| ATOM | 774 | H5  | BGLC | 18 | 8.800  | 6.683-195.913 | 1.00 | 0.00 | CARB |
| ATOM | 775 | O5  | BGLC | 18 | 7.956  | 5.104-194.799 | 1.00 | 2.00 | CARB |
| ATOM | 776 | C2  | BGLC | 18 | 9.830  | 3.667-195.278 | 1.00 | 2.00 | CARB |
| ATOM | 777 | H2  | BGLC | 18 | 9.257  | 2.685-195.302 | 1.00 | 0.00 | CARB |
| ATOM | 778 | O2  | BGLC | 18 | 11.126 | 3.381-194.745 | 1.00 | 2.00 | CARB |
| ATOM | 779 | HO2 | BGLC | 18 | 11.393 | 2.466-194.731 | 1.00 | 0.00 | CARB |
| ATOM | 780 | C3  | BGLC | 18 | 9.938  | 4.267-196.661 | 1.00 | 2.00 | CARB |
| ATOM | 781 | H3  | BGLC | 18 | 10.661 | 5.081-196.618 | 1.00 | 0.00 | CARB |
| ATOM | 782 | O3  | BGLC | 18 | 10.283 | 3.233-197.605 | 1.00 | 2.00 | CARB |
| ATOM | 783 | HO3 | BGLC | 18 | 11.147 | 2.853-197.612 | 1.00 | 0.00 | CARB |
| ATOM | 784 | C4  | BGLC | 18 | 8.653  | 4.960-197.079 | 1.00 | 2.00 | CARB |
| ATOM | 785 | H4  | BGLC | 18 | 7.938  | 4.173-197.299 | 1.00 | 0.00 | CARB |
| ATOM | 786 | O4  | BGLC | 18 | 8.717  | 5.615-198.308 | 1.00 | 2.00 | CARB |
| ATOM | 787 | C6  | BGLC | 18 | 6.689  | 6.373-196.333 | 1.00 | 2.00 | CARB |
| ATOM | 788 | H61 | BGLC | 18 | 6.167  | 5.467-196.804 | 1.00 | 0.00 | CARB |
| ATOM | 789 | H62 | BGLC | 18 | 6.042  | 6.635-195.502 | 1.00 | 0.00 | CARB |
| ATOM | 790 | O6  | BGLC | 18 | 6.744  | 7.321-197.385 | 1.00 | 2.00 | CARB |
| ATOM | 791 | HO6 | BGLC | 18 | 7.327  | 8.069-197.299 | 1.00 | 0.00 | CARB |
| ATOM | 792 | C1  | BGLC | 19 | 8.546  | 4.984-199.485 | 1.00 | 2.00 | CARB |
| ATOM | 793 | H1  | BGLC | 19 | 7.876  | 4.138-199.385 | 1.00 | 0.00 | CARB |
| ATOM | 794 | C5  | BGLC | 19 | 9.679  | 3.796-201.211 | 1.00 | 2.00 | CARB |
| ATOM | 795 | H5  | BGLC | 19 | 8.953  | 2.965-201.097 | 1.00 | 0.00 | CARB |
| ATOM | 796 | O5  | BGLC | 19 | 9.800  | 4.547-199.988 | 1.00 | 2.00 | CARB |
| ATOM | 797 | C2  | BGLC | 19 | 7.924  | 5.982-200.471 | 1.00 | 2.00 | CARB |
| ATOM | 798 | H2  | BGLC | 19 | 8.498  | 6.964-200.498 | 1.00 | 0.00 | CARB |
| ATOM | 799 | O2  | BGLC | 19 | 6.629  | 6.270-199.938 | 1.00 | 2.00 | CARB |
| ATOM | 800 | HO2 | BGLC | 19 | 6.362  | 7.185-199.927 | 1.00 | 0.00 | CARB |
| ATOM | 801 | C3  | BGLC | 19 | 7.816  | 5.378-201.852 | 1.00 | 2.00 | CARB |
| ATOM | 802 | H3  | BGLC | 19 | 7.092  | 4.565-201.805 | 1.00 | 0.00 | CARB |
| ATOM | 803 | O3  | BGLC | 19 | 7.471  | 6.409-202.800 | 1.00 | 2.00 | CARB |
| ATOM | 804 | HO3 | BGLC | 19 | 6.607  | 6.789-202.809 | 1.00 | 0.00 | CARB |
| ATOM | 805 | C4  | BGLC | 19 | 9.100  | 4.682-202.268 | 1.00 | 2.00 | CARB |
| ATOM | 806 | H4  | BGLC | 19 | 9.814  | 5.469-202.491 | 1.00 | 0.00 | CARB |
| ATOM | 807 | O4  | BGLC | 19 | 9.036  | 4.023-203.495 | 1.00 | 2.00 | CARB |
| ATOM | 808 | C6  | BGLC | 19 | 11.066 | 3.272-201.518 | 1.00 | 2.00 | CARB |

|      |     |     |      |    |         |                |      |      |      |
|------|-----|-----|------|----|---------|----------------|------|------|------|
| ATOM | 809 | H61 | BGLC | 19 | 11.589  | 4.175-201.994  | 1.00 | 0.00 | CARB |
| ATOM | 810 | H62 | BGLC | 19 | 11.712  | 3.013-200.686  | 1.00 | 0.00 | CARB |
| ATOM | 811 | O6  | BGLC | 19 | 11.008  | 2.321-202.566  | 1.00 | 2.00 | CARB |
| ATOM | 812 | HO6 | BGLC | 19 | 10.423  | 1.575-202.477  | 1.00 | 0.00 | CARB |
| ATOM | 813 | C1  | BGLC | 20 | 9.204   | 4.649-204.674  | 1.00 | 2.00 | CARB |
| ATOM | 814 | H1  | BGLC | 20 | 9.873   | 5.496-204.578  | 1.00 | 0.00 | CARB |
| ATOM | 815 | C5  | BGLC | 20 | 8.070   | 5.830-206.404  | 1.00 | 2.00 | CARB |
| ATOM | 816 | H5  | BGLC | 20 | 8.795   | 6.662-206.293  | 1.00 | 0.00 | CARB |
| ATOM | 817 | O5  | BGLC | 20 | 7.951   | 5.083-205.179  | 1.00 | 2.00 | CARB |
| ATOM | 818 | C2  | BGLC | 20 | 9.826   | 3.647-205.658  | 1.00 | 2.00 | CARB |
| ATOM | 819 | H2  | BGLC | 20 | 9.252   | 2.665-205.680  | 1.00 | 0.00 | CARB |
| ATOM | 820 | O2  | BGLC | 20 | 11.121  | 3.360-205.125  | 1.00 | 2.00 | CARB |
| ATOM | 821 | HO2 | BGLC | 20 | 11.387  | 2.445-205.112  | 1.00 | 0.00 | CARB |
| ATOM | 822 | C3  | BGLC | 20 | 9.933   | 4.245-207.041  | 1.00 | 2.00 | CARB |
| ATOM | 823 | H3  | BGLC | 20 | 10.657  | 5.058-206.996  | 1.00 | 0.00 | CARB |
| ATOM | 824 | O3  | BGLC | 20 | 10.278  | 3.212-207.985  | 1.00 | 2.00 | CARB |
| ATOM | 825 | HO3 | BGLC | 20 | 11.142  | 2.832-207.993  | 1.00 | 0.00 | CARB |
| ATOM | 826 | C4  | BGLC | 20 | 8.649   | 4.941-207.459  | 1.00 | 2.00 | CARB |
| ATOM | 827 | H4  | BGLC | 20 | 7.899   | 4.212-207.749  | 1.00 | 0.00 | CARB |
| ATOM | 828 | O4  | BGLC | 20 | 8.819   | 5.684-208.679  | 1.00 | 2.00 | CARB |
| ATOM | 829 | HO4 | BGLC | 20 | 9.280   | 5.116-209.347  | 1.00 | 0.00 | CARB |
| ATOM | 830 | C6  | BGLC | 20 | 6.683   | 6.352-206.713  | 1.00 | 2.00 | CARB |
| ATOM | 831 | H61 | BGLC | 20 | 6.161   | 5.447-207.185  | 1.00 | 0.00 | CARB |
| ATOM | 832 | H62 | BGLC | 20 | 6.036   | 6.614-205.882  | 1.00 | 0.00 | CARB |
| ATOM | 833 | O6  | BGLC | 20 | 6.740   | 7.300-207.765  | 1.00 | 2.00 | CARB |
| ATOM | 834 | HO6 | BGLC | 20 | 7.324   | 8.047-207.678  | 1.00 | 0.00 | CARB |
| ATOM | 835 | C1  | BGLC | 1  | -9.327  | 11.306-106.069 | 1.00 | 2.00 | CARC |
| ATOM | 836 | H1  | BGLC | 1  | -10.086 | 10.544-105.936 | 1.00 | 0.00 | CARC |
| ATOM | 837 | O1  | BGLC | 1  | -9.050  | 12.028-104.884 | 1.00 | 2.00 | CARC |
| ATOM | 838 | HO1 | BGLC | 1  | -8.664  | 12.835-105.150 | 1.00 | 0.00 | CARC |
| ATOM | 839 | C5  | BGLC | 1  | -8.193  | 10.119-107.796 | 1.00 | 2.00 | CARC |
| ATOM | 840 | H5  | BGLC | 1  | -8.919  | 9.288-107.682  | 1.00 | 0.00 | CARC |
| ATOM | 841 | O5  | BGLC | 1  | -8.073  | 10.870-106.573 | 1.00 | 2.00 | CARC |
| ATOM | 842 | C2  | BGLC | 1  | -9.950  | 12.304-107.056 | 1.00 | 2.00 | CARC |
| ATOM | 843 | H2  | BGLC | 1  | -9.375  | 13.285-107.081 | 1.00 | 0.00 | CARC |
| ATOM | 844 | O2  | BGLC | 1  | -11.244 | 12.594-106.523 | 1.00 | 2.00 | CARC |
| ATOM | 845 | HO2 | BGLC | 1  | -11.510 | 13.509-106.514 | 1.00 | 0.00 | CARC |
| ATOM | 846 | C3  | BGLC | 1  | -10.056 | 11.701-108.437 | 1.00 | 2.00 | CARC |
| ATOM | 847 | H3  | BGLC | 1  | -10.780 | 10.888-108.388 | 1.00 | 0.00 | CARC |
| ATOM | 848 | O3  | BGLC | 1  | -10.403 | 12.731-109.385 | 1.00 | 2.00 | CARC |
| ATOM | 849 | HO3 | BGLC | 1  | -11.268 | 13.109-109.394 | 1.00 | 0.00 | CARC |
| ATOM | 850 | C4  | BGLC | 1  | -8.773  | 11.005-108.853 | 1.00 | 2.00 | CARC |
| ATOM | 851 | H4  | BGLC | 1  | -8.060  | 11.793-109.076 | 1.00 | 0.00 | CARC |
| ATOM | 852 | O4  | BGLC | 1  | -8.837  | 10.346-110.080 | 1.00 | 2.00 | CARC |
| ATOM | 853 | C6  | BGLC | 1  | -6.807  | 9.595-108.103  | 1.00 | 2.00 | CARC |
| ATOM | 854 | H61 | BGLC | 1  | -6.284  | 10.498-108.579 | 1.00 | 0.00 | CARC |
| ATOM | 855 | H62 | BGLC | 1  | -6.160  | 9.335-107.271  | 1.00 | 0.00 | CARC |
| ATOM | 856 | O6  | BGLC | 1  | -6.865  | 8.644-109.151  | 1.00 | 2.00 | CARC |
| ATOM | 857 | HO6 | BGLC | 1  | -7.450  | 7.898-109.062  | 1.00 | 0.00 | CARC |
| ATOM | 858 | C1  | BGLC | 2  | -8.668  | 10.971-111.259 | 1.00 | 2.00 | CARC |
| ATOM | 859 | H1  | BGLC | 2  | -7.998  | 11.817-111.164 | 1.00 | 0.00 | CARC |
| ATOM | 860 | C5  | BGLC | 2  | -9.803  | 12.153-112.989 | 1.00 | 2.00 | CARC |
| ATOM | 861 | H5  | BGLC | 2  | -9.077  | 12.984-112.879 | 1.00 | 0.00 | CARC |
| ATOM | 862 | O5  | BGLC | 2  | -9.922  | 11.406-111.763 | 1.00 | 2.00 | CARC |



|      |     |     |      |   |         |                |      |      |      |
|------|-----|-----|------|---|---------|----------------|------|------|------|
| ATOM | 863 | C2  | BGLC | 2 | -8.047  | 9.970-112.242  | 1.00 | 2.00 | CARC |
| ATOM | 864 | H2  | BGLC | 2 | -8.622  | 8.989-112.264  | 1.00 | 0.00 | CARC |
| ATOM | 865 | O2  | BGLC | 2 | -6.751  | 9.683-111.709  | 1.00 | 2.00 | CARC |
| ATOM | 866 | HO2 | BGLC | 2 | -6.485  | 8.768-111.696  | 1.00 | 0.00 | CARC |
| ATOM | 867 | C3  | BGLC | 2 | -7.939  | 10.568-113.626 | 1.00 | 2.00 | CARC |
| ATOM | 868 | H3  | BGLC | 2 | -7.216  | 11.382-113.582 | 1.00 | 0.00 | CARC |
| ATOM | 869 | O3  | BGLC | 2 | -7.594  | 9.535-114.570  | 1.00 | 2.00 | CARC |
| ATOM | 870 | HO3 | BGLC | 2 | -6.730  | 9.155-114.578  | 1.00 | 0.00 | CARC |
| ATOM | 871 | C4  | BGLC | 2 | -9.224  | 11.262-114.043 | 1.00 | 2.00 | CARC |
| ATOM | 872 | H4  | BGLC | 2 | -9.937  | 10.473-114.261 | 1.00 | 0.00 | CARC |
| ATOM | 873 | O4  | BGLC | 2 | -9.162  | 11.915-115.274 | 1.00 | 2.00 | CARC |
| ATOM | 874 | C6  | BGLC | 2 | -11.189 | 12.676-113.297 | 1.00 | 2.00 | CARC |
| ATOM | 875 | H61 | BGLC | 2 | -11.712 | 11.771-113.768 | 1.00 | 0.00 | CARC |
| ATOM | 876 | H62 | BGLC | 2 | -11.835 | 12.939-112.465 | 1.00 | 0.00 | CARC |
| ATOM | 877 | O6  | BGLC | 2 | -11.133 | 13.624-114.349 | 1.00 | 2.00 | CARC |
| ATOM | 878 | HO6 | BGLC | 2 | -10.549 | 14.371-114.263 | 1.00 | 0.00 | CARC |
| ATOM | 879 | C1  | BGLC | 3 | -9.332  | 11.286-116.449 | 1.00 | 2.00 | CARC |
| ATOM | 880 | H1  | BGLC | 3 | -10.001 | 10.440-116.350 | 1.00 | 0.00 | CARC |
| ATOM | 881 | C5  | BGLC | 3 | -8.198  | 10.099-118.176 | 1.00 | 2.00 | CARC |
| ATOM | 882 | H5  | BGLC | 3 | -8.925  | 9.269-118.062  | 1.00 | 0.00 | CARC |
| ATOM | 883 | O5  | BGLC | 3 | -8.078  | 10.850-116.953 | 1.00 | 2.00 | CARC |
| ATOM | 884 | C2  | BGLC | 3 | -9.954  | 12.285-117.436 | 1.00 | 2.00 | CARC |
| ATOM | 885 | H2  | BGLC | 3 | -9.381  | 13.267-117.464 | 1.00 | 0.00 | CARC |
| ATOM | 886 | O2  | BGLC | 3 | -11.249 | 12.574-116.903 | 1.00 | 2.00 | CARC |
| ATOM | 887 | HO2 | BGLC | 3 | -11.515 | 13.489-116.893 | 1.00 | 0.00 | CARC |
| ATOM | 888 | C3  | BGLC | 3 | -10.061 | 11.679-118.817 | 1.00 | 2.00 | CARC |
| ATOM | 889 | H3  | BGLC | 3 | -10.784 | 10.866-118.769 | 1.00 | 0.00 | CARC |
| ATOM | 890 | O3  | BGLC | 3 | -10.408 | 12.710-119.765 | 1.00 | 2.00 | CARC |
| ATOM | 891 | HO3 | BGLC | 3 | -11.273 | 13.089-119.773 | 1.00 | 0.00 | CARC |
| ATOM | 892 | C4  | BGLC | 3 | -8.778  | 10.984-119.233 | 1.00 | 2.00 | CARC |
| ATOM | 893 | H4  | BGLC | 3 | -8.065  | 11.772-119.456 | 1.00 | 0.00 | CARC |
| ATOM | 894 | O4  | BGLC | 3 | -8.842  | 10.326-120.460 | 1.00 | 2.00 | CARC |
| ATOM | 895 | C6  | BGLC | 3 | -6.812  | 9.574-118.483  | 1.00 | 2.00 | CARC |
| ATOM | 896 | H61 | BGLC | 3 | -6.289  | 10.478-118.957 | 1.00 | 0.00 | CARC |
| ATOM | 897 | H62 | BGLC | 3 | -6.166  | 9.314-117.651  | 1.00 | 0.00 | CARC |
| ATOM | 898 | O6  | BGLC | 3 | -6.868  | 8.623-119.531  | 1.00 | 2.00 | CARC |
| ATOM | 899 | HO6 | BGLC | 3 | -7.452  | 7.877-119.443  | 1.00 | 0.00 | CARC |
| ATOM | 900 | C1  | BGLC | 4 | -8.672  | 10.952-121.639 | 1.00 | 2.00 | CARC |
| ATOM | 901 | H1  | BGLC | 4 | -8.002  | 11.799-121.543 | 1.00 | 0.00 | CARC |
| ATOM | 902 | C5  | BGLC | 4 | -9.808  | 12.133-123.369 | 1.00 | 2.00 | CARC |
| ATOM | 903 | H5  | BGLC | 4 | -9.083  | 12.965-123.259 | 1.00 | 0.00 | CARC |
| ATOM | 904 | O5  | BGLC | 4 | -9.926  | 11.386-122.143 | 1.00 | 2.00 | CARC |
| ATOM | 905 | C2  | BGLC | 4 | -8.051  | 9.950-122.622  | 1.00 | 2.00 | CARC |
| ATOM | 906 | H2  | BGLC | 4 | -8.626  | 8.968-122.644  | 1.00 | 0.00 | CARC |
| ATOM | 907 | O2  | BGLC | 4 | -6.756  | 9.663-122.089  | 1.00 | 2.00 | CARC |
| ATOM | 908 | HO2 | BGLC | 4 | -6.490  | 8.748-122.075  | 1.00 | 0.00 | CARC |
| ATOM | 909 | C3  | BGLC | 4 | -7.944  | 10.548-124.006 | 1.00 | 2.00 | CARC |
| ATOM | 910 | H3  | BGLC | 4 | -7.221  | 11.361-123.963 | 1.00 | 0.00 | CARC |
| ATOM | 911 | O3  | BGLC | 4 | -7.599  | 9.514-124.950  | 1.00 | 2.00 | CARC |
| ATOM | 912 | HO3 | BGLC | 4 | -6.735  | 9.134-124.958  | 1.00 | 0.00 | CARC |
| ATOM | 913 | C4  | BGLC | 4 | -9.229  | 11.242-124.423 | 1.00 | 2.00 | CARC |
| ATOM | 914 | H4  | BGLC | 4 | -9.942  | 10.453-124.641 | 1.00 | 0.00 | CARC |
| ATOM | 915 | O4  | BGLC | 4 | -9.166  | 11.894-125.654 | 1.00 | 2.00 | CARC |
| ATOM | 916 | C6  | BGLC | 4 | -11.194 | 12.654-123.677 | 1.00 | 2.00 | CARC |

|      |     |     |      |   |         |                |      |      |      |
|------|-----|-----|------|---|---------|----------------|------|------|------|
| ATOM | 917 | H61 | BGLC | 4 | -11.716 | 11.749-124.149 | 1.00 | 0.00 | CARC |
| ATOM | 918 | H62 | BGLC | 4 | -11.841 | 12.915-122.845 | 1.00 | 0.00 | CARC |
| ATOM | 919 | O6  | BGLC | 4 | -11.138 | 13.603-124.729 | 1.00 | 2.00 | CARC |
| ATOM | 920 | HO6 | BGLC | 4 | -10.555 | 14.350-124.642 | 1.00 | 0.00 | CARC |
| ATOM | 921 | C1  | BGLC | 5 | -9.336  | 11.265-126.829 | 1.00 | 2.00 | CARC |
| ATOM | 922 | H1  | BGLC | 5 | -10.005 | 10.419-126.730 | 1.00 | 0.00 | CARC |
| ATOM | 923 | C5  | BGLC | 5 | -8.202  | 10.078-128.556 | 1.00 | 2.00 | CARC |
| ATOM | 924 | H5  | BGLC | 5 | -8.928  | 9.247-128.442  | 1.00 | 0.00 | CARC |
| ATOM | 925 | O5  | BGLC | 5 | -8.082  | 10.829-127.333 | 1.00 | 2.00 | CARC |
| ATOM | 926 | C2  | BGLC | 5 | -9.959  | 12.264-127.816 | 1.00 | 2.00 | CARC |
| ATOM | 927 | H2  | BGLC | 5 | -9.385  | 13.246-127.843 | 1.00 | 0.00 | CARC |
| ATOM | 928 | O2  | BGLC | 5 | -11.253 | 12.553-127.283 | 1.00 | 2.00 | CARC |
| ATOM | 929 | HO2 | BGLC | 5 | -11.519 | 13.468-127.273 | 1.00 | 0.00 | CARC |
| ATOM | 930 | C3  | BGLC | 5 | -10.066 | 11.659-129.197 | 1.00 | 2.00 | CARC |
| ATOM | 931 | H3  | BGLC | 5 | -10.789 | 10.846-129.149 | 1.00 | 0.00 | CARC |
| ATOM | 932 | O3  | BGLC | 5 | -10.413 | 12.690-130.145 | 1.00 | 2.00 | CARC |
| ATOM | 933 | HO3 | BGLC | 5 | -11.278 | 13.069-130.153 | 1.00 | 0.00 | CARC |
| ATOM | 934 | C4  | BGLC | 5 | -8.783  | 10.964-129.613 | 1.00 | 2.00 | CARC |
| ATOM | 935 | H4  | BGLC | 5 | -8.070  | 11.752-129.836 | 1.00 | 0.00 | CARC |
| ATOM | 936 | O4  | BGLC | 5 | -8.847  | 10.305-130.840 | 1.00 | 2.00 | CARC |
| ATOM | 937 | C6  | BGLC | 5 | -6.817  | 9.554-128.863  | 1.00 | 2.00 | CARC |
| ATOM | 938 | H61 | BGLC | 5 | -6.295  | 10.457-129.339 | 1.00 | 0.00 | CARC |
| ATOM | 939 | H62 | BGLC | 5 | -6.170  | 9.295-128.031  | 1.00 | 0.00 | CARC |
| ATOM | 940 | O6  | BGLC | 5 | -6.873  | 8.601-129.911  | 1.00 | 2.00 | CARC |
| ATOM | 941 | HO6 | BGLC | 5 | -7.457  | 7.854-129.822  | 1.00 | 0.00 | CARC |
| ATOM | 942 | C1  | BGLC | 6 | -8.677  | 10.931-132.019 | 1.00 | 2.00 | CARC |
| ATOM | 943 | H1  | BGLC | 6 | -8.007  | 11.778-131.923 | 1.00 | 0.00 | CARC |
| ATOM | 944 | C5  | BGLC | 6 | -9.813  | 12.111-133.749 | 1.00 | 2.00 | CARC |
| ATOM | 945 | H5  | BGLC | 6 | -9.086  | 12.942-133.640 | 1.00 | 0.00 | CARC |
| ATOM | 946 | O5  | BGLC | 6 | -9.931  | 11.365-132.523 | 1.00 | 2.00 | CARC |
| ATOM | 947 | C2  | BGLC | 6 | -8.056  | 9.928-133.002  | 1.00 | 2.00 | CARC |
| ATOM | 948 | H2  | BGLC | 6 | -8.630  | 8.946-133.025  | 1.00 | 0.00 | CARC |
| ATOM | 949 | O2  | BGLC | 6 | -6.761  | 9.641-132.469  | 1.00 | 2.00 | CARC |
| ATOM | 950 | HO2 | BGLC | 6 | -6.495  | 8.726-132.455  | 1.00 | 0.00 | CARC |
| ATOM | 951 | C3  | BGLC | 6 | -7.949  | 10.527-134.386 | 1.00 | 2.00 | CARC |
| ATOM | 952 | H3  | BGLC | 6 | -7.226  | 11.341-134.342 | 1.00 | 0.00 | CARC |
| ATOM | 953 | O3  | BGLC | 6 | -7.603  | 9.494-135.330  | 1.00 | 2.00 | CARC |
| ATOM | 954 | HO3 | BGLC | 6 | -6.738  | 9.115-135.338  | 1.00 | 0.00 | CARC |
| ATOM | 955 | C4  | BGLC | 6 | -9.234  | 11.221-134.803 | 1.00 | 2.00 | CARC |
| ATOM | 956 | H4  | BGLC | 6 | -9.948  | 10.433-135.022 | 1.00 | 0.00 | CARC |
| ATOM | 957 | O4  | BGLC | 6 | -9.170  | 11.874-136.034 | 1.00 | 2.00 | CARC |
| ATOM | 958 | C6  | BGLC | 6 | -11.198 | 12.635-134.057 | 1.00 | 2.00 | CARC |
| ATOM | 959 | O61 | BGLC | 6 | -11.217 | 14.050-134.106 | 1.00 | 0.00 | CARC |
| ATOM | 960 | O62 | BGLC | 6 | -11.877 | 11.785-134.173 | 1.00 | 0.00 | CARC |
| ATOM | 961 | C1  | BGLC | 7 | -9.340  | 11.245-137.209 | 1.00 | 2.00 | CARC |
| ATOM | 962 | H1  | BGLC | 7 | -10.010 | 10.399-137.110 | 1.00 | 0.00 | CARC |
| ATOM | 963 | C5  | BGLC | 7 | -8.207  | 10.057-138.936 | 1.00 | 2.00 | CARC |
| ATOM | 964 | H5  | BGLC | 7 | -8.933  | 9.226-138.822  | 1.00 | 0.00 | CARC |
| ATOM | 965 | O5  | BGLC | 7 | -8.087  | 10.808-137.713 | 1.00 | 2.00 | CARC |
| ATOM | 966 | C2  | BGLC | 7 | -9.962  | 12.244-138.196 | 1.00 | 2.00 | CARC |
| ATOM | 967 | H2  | BGLC | 7 | -9.389  | 13.226-138.225 | 1.00 | 0.00 | CARC |
| ATOM | 968 | O2  | BGLC | 7 | -11.257 | 12.531-137.663 | 1.00 | 2.00 | CARC |
| ATOM | 969 | HO2 | BGLC | 7 | -11.524 | 13.445-137.652 | 1.00 | 0.00 | CARC |
| ATOM | 970 | C3  | BGLC | 7 | -10.071 | 11.638-139.577 | 1.00 | 2.00 | CARC |

|      |      |     |      |    |         |                |      |      |      |
|------|------|-----|------|----|---------|----------------|------|------|------|
| ATOM | 971  | H3  | BGLC | 7  | -10.794 | 10.825-139.530 | 1.00 | 0.00 | CARC |
| ATOM | 972  | O3  | BGLC | 7  | -10.416 | 12.669-140.525 | 1.00 | 2.00 | CARC |
| ATOM | 973  | HO3 | BGLC | 7  | -11.280 | 13.050-140.533 | 1.00 | 0.00 | CARC |
| ATOM | 974  | C4  | BGLC | 7  | -8.787  | 10.943-139.993 | 1.00 | 2.00 | CARC |
| ATOM | 975  | H4  | BGLC | 7  | -8.074  | 11.731-140.215 | 1.00 | 0.00 | CARC |
| ATOM | 976  | O4  | BGLC | 7  | -8.850  | 10.284-141.220 | 1.00 | 2.00 | CARC |
| ATOM | 977  | C6  | BGLC | 7  | -6.821  | 9.533-139.243  | 1.00 | 2.00 | CARC |
| ATOM | 978  | H61 | BGLC | 7  | -6.299  | 10.436-139.719 | 1.00 | 0.00 | CARC |
| ATOM | 979  | H62 | BGLC | 7  | -6.174  | 9.274-138.411  | 1.00 | 0.00 | CARC |
| ATOM | 980  | O6  | BGLC | 7  | -6.878  | 8.581-140.291  | 1.00 | 2.00 | CARC |
| ATOM | 981  | HO6 | BGLC | 7  | -7.462  | 7.834-140.202  | 1.00 | 0.00 | CARC |
| ATOM | 982  | C1  | BGLC | 8  | -8.681  | 10.910-142.399 | 1.00 | 2.00 | CARC |
| ATOM | 983  | H1  | BGLC | 8  | -8.011  | 11.756-142.303 | 1.00 | 0.00 | CARC |
| ATOM | 984  | C5  | BGLC | 8  | -9.816  | 12.090-144.129 | 1.00 | 2.00 | CARC |
| ATOM | 985  | H5  | BGLC | 8  | -9.089  | 12.921-144.020 | 1.00 | 0.00 | CARC |
| ATOM | 986  | O5  | BGLC | 8  | -9.935  | 11.345-142.903 | 1.00 | 2.00 | CARC |
| ATOM | 987  | C2  | BGLC | 8  | -8.061  | 9.908-143.382  | 1.00 | 2.00 | CARC |
| ATOM | 988  | H2  | BGLC | 8  | -8.636  | 8.926-143.404  | 1.00 | 0.00 | CARC |
| ATOM | 989  | O2  | BGLC | 8  | -6.766  | 9.621-142.849  | 1.00 | 2.00 | CARC |
| ATOM | 990  | HO2 | BGLC | 8  | -6.500  | 8.706-142.835  | 1.00 | 0.00 | CARC |
| ATOM | 991  | C3  | BGLC | 8  | -7.954  | 10.506-144.766 | 1.00 | 2.00 | CARC |
| ATOM | 992  | H3  | BGLC | 8  | -7.230  | 11.319-144.722 | 1.00 | 0.00 | CARC |
| ATOM | 993  | O3  | BGLC | 8  | -7.608  | 9.472-145.710  | 1.00 | 2.00 | CARC |
| ATOM | 994  | HO3 | BGLC | 8  | -6.743  | 9.093-145.718  | 1.00 | 0.00 | CARC |
| ATOM | 995  | C4  | BGLC | 8  | -9.238  | 11.200-145.183 | 1.00 | 2.00 | CARC |
| ATOM | 996  | H4  | BGLC | 8  | -9.952  | 10.412-145.402 | 1.00 | 0.00 | CARC |
| ATOM | 997  | O4  | BGLC | 8  | -9.175  | 11.853-146.414 | 1.00 | 2.00 | CARC |
| ATOM | 998  | C6  | BGLC | 8  | -11.203 | 12.614-144.437 | 1.00 | 2.00 | CARC |
| ATOM | 999  | H61 | BGLC | 8  | -11.727 | 11.709-144.909 | 1.00 | 0.00 | CARC |
| ATOM | 1000 | H62 | BGLC | 8  | -11.849 | 12.877-143.605 | 1.00 | 0.00 | CARC |
| ATOM | 1001 | O6  | BGLC | 8  | -11.146 | 13.562-145.489 | 1.00 | 2.00 | CARC |
| ATOM | 1002 | HO6 | BGLC | 8  | -10.561 | 14.308-145.403 | 1.00 | 0.00 | CARC |
| ATOM | 1003 | C1  | BGLC | 9  | -9.345  | 11.225-147.589 | 1.00 | 2.00 | CARC |
| ATOM | 1004 | H1  | BGLC | 9  | -10.015 | 10.379-147.490 | 1.00 | 0.00 | CARC |
| ATOM | 1005 | C5  | BGLC | 9  | -8.212  | 10.037-149.315 | 1.00 | 2.00 | CARC |
| ATOM | 1006 | H5  | BGLC | 9  | -8.938  | 9.207-149.201  | 1.00 | 0.00 | CARC |
| ATOM | 1007 | O5  | BGLC | 9  | -8.091  | 10.788-148.093 | 1.00 | 2.00 | CARC |
| ATOM | 1008 | C2  | BGLC | 9  | -9.967  | 12.222-148.576 | 1.00 | 2.00 | CARC |
| ATOM | 1009 | H2  | BGLC | 9  | -9.393  | 13.204-148.603 | 1.00 | 0.00 | CARC |
| ATOM | 1010 | O2  | BGLC | 9  | -11.262 | 12.511-148.043 | 1.00 | 2.00 | CARC |
| ATOM | 1011 | HO2 | BGLC | 9  | -11.528 | 13.426-148.033 | 1.00 | 0.00 | CARC |
| ATOM | 1012 | C3  | BGLC | 9  | -10.075 | 11.618-149.957 | 1.00 | 2.00 | CARC |
| ATOM | 1013 | H3  | BGLC | 9  | -10.799 | 10.805-149.910 | 1.00 | 0.00 | CARC |
| ATOM | 1014 | O3  | BGLC | 9  | -10.421 | 12.649-150.905 | 1.00 | 2.00 | CARC |
| ATOM | 1015 | HO3 | BGLC | 9  | -11.285 | 13.029-150.913 | 1.00 | 0.00 | CARC |
| ATOM | 1016 | C4  | BGLC | 9  | -8.791  | 10.922-150.373 | 1.00 | 2.00 | CARC |
| ATOM | 1017 | H4  | BGLC | 9  | -8.077  | 11.709-150.596 | 1.00 | 0.00 | CARC |
| ATOM | 1018 | O4  | BGLC | 9  | -8.855  | 10.264-151.600 | 1.00 | 2.00 | CARC |
| ATOM | 1019 | C6  | BGLC | 9  | -6.825  | 9.512-149.623  | 1.00 | 2.00 | CARC |
| ATOM | 1020 | H61 | BGLC | 9  | -6.303  | 10.415-150.098 | 1.00 | 0.00 | CARC |
| ATOM | 1021 | H62 | BGLC | 9  | -6.178  | 9.253-148.791  | 1.00 | 0.00 | CARC |
| ATOM | 1022 | O6  | BGLC | 9  | -6.882  | 8.560-150.671  | 1.00 | 2.00 | CARC |
| ATOM | 1023 | HO6 | BGLC | 9  | -7.466  | 7.813-150.582  | 1.00 | 0.00 | CARC |
| ATOM | 1024 | C1  | BGLC | 10 | -8.687  | 10.889-152.779 | 1.00 | 2.00 | CARC |

|      |      |     |      |    |         |                |      |      |      |
|------|------|-----|------|----|---------|----------------|------|------|------|
| ATOM | 1025 | H1  | BGLC | 10 | -8.017  | 11.735-152.684 | 1.00 | 0.00 | CARC |
| ATOM | 1026 | C5  | BGLC | 10 | -9.820  | 12.070-154.509 | 1.00 | 2.00 | CARC |
| ATOM | 1027 | H5  | BGLC | 10 | -9.094  | 12.901-154.399 | 1.00 | 0.00 | CARC |
| ATOM | 1028 | O5  | BGLC | 10 | -9.940  | 11.324-153.283 | 1.00 | 2.00 | CARC |
| ATOM | 1029 | C2  | BGLC | 10 | -8.065  | 9.887-153.762  | 1.00 | 2.00 | CARC |
| ATOM | 1030 | H2  | BGLC | 10 | -8.639  | 8.905-153.785  | 1.00 | 0.00 | CARC |
| ATOM | 1031 | O2  | BGLC | 10 | -6.769  | 9.600-153.229  | 1.00 | 2.00 | CARC |
| ATOM | 1032 | HO2 | BGLC | 10 | -6.503  | 8.685-153.216  | 1.00 | 0.00 | CARC |
| ATOM | 1033 | C3  | BGLC | 10 | -7.958  | 10.486-155.146 | 1.00 | 2.00 | CARC |
| ATOM | 1034 | H3  | BGLC | 10 | -7.235  | 11.300-155.104 | 1.00 | 0.00 | CARC |
| ATOM | 1035 | O3  | BGLC | 10 | -7.613  | 9.451-156.090  | 1.00 | 2.00 | CARC |
| ATOM | 1036 | HO3 | BGLC | 10 | -6.749  | 9.071-156.098  | 1.00 | 0.00 | CARC |
| ATOM | 1037 | C4  | BGLC | 10 | -9.243  | 11.179-155.563 | 1.00 | 2.00 | CARC |
| ATOM | 1038 | H4  | BGLC | 10 | -9.958  | 10.391-155.781 | 1.00 | 0.00 | CARC |
| ATOM | 1039 | O4  | BGLC | 10 | -9.180  | 11.833-156.794 | 1.00 | 2.00 | CARC |
| ATOM | 1040 | C6  | BGLC | 10 | -11.208 | 12.592-154.817 | 1.00 | 2.00 | CARC |
| ATOM | 1041 | O61 | BGLC | 10 | -11.229 | 14.007-154.869 | 1.00 | 0.00 | CARC |
| ATOM | 1042 | O62 | BGLC | 10 | -11.886 | 11.741-154.931 | 1.00 | 0.00 | CARC |
| ATOM | 1043 | C1  | BGLC | 11 | -9.349  | 11.203-157.969 | 1.00 | 2.00 | CARC |
| ATOM | 1044 | H1  | BGLC | 11 | -10.019 | 10.357-157.870 | 1.00 | 0.00 | CARC |
| ATOM | 1045 | C5  | BGLC | 11 | -8.216  | 10.016-159.695 | 1.00 | 2.00 | CARC |
| ATOM | 1046 | H5  | BGLC | 11 | -8.943  | 9.186-159.581  | 1.00 | 0.00 | CARC |
| ATOM | 1047 | O5  | BGLC | 11 | -8.095  | 10.766-158.473 | 1.00 | 2.00 | CARC |
| ATOM | 1048 | C2  | BGLC | 11 | -9.972  | 12.202-158.956 | 1.00 | 2.00 | CARC |
| ATOM | 1049 | H2  | BGLC | 11 | -9.399  | 13.184-158.983 | 1.00 | 0.00 | CARC |
| ATOM | 1050 | O2  | BGLC | 11 | -11.266 | 12.490-158.423 | 1.00 | 2.00 | CARC |
| ATOM | 1051 | HO2 | BGLC | 11 | -11.533 | 13.405-158.413 | 1.00 | 0.00 | CARC |
| ATOM | 1052 | C3  | BGLC | 11 | -10.079 | 11.598-160.337 | 1.00 | 2.00 | CARC |
| ATOM | 1053 | H3  | BGLC | 11 | -10.803 | 10.785-160.288 | 1.00 | 0.00 | CARC |
| ATOM | 1054 | O3  | BGLC | 11 | -10.426 | 12.628-161.285 | 1.00 | 2.00 | CARC |
| ATOM | 1055 | HO3 | BGLC | 11 | -11.291 | 13.007-161.294 | 1.00 | 0.00 | CARC |
| ATOM | 1056 | C4  | BGLC | 11 | -8.796  | 10.901-160.753 | 1.00 | 2.00 | CARC |
| ATOM | 1057 | H4  | BGLC | 11 | -8.083  | 11.689-160.976 | 1.00 | 0.00 | CARC |
| ATOM | 1058 | O4  | BGLC | 11 | -8.860  | 10.243-161.980 | 1.00 | 2.00 | CARC |
| ATOM | 1059 | C6  | BGLC | 11 | -6.830  | 9.491-160.003  | 1.00 | 2.00 | CARC |
| ATOM | 1060 | H61 | BGLC | 11 | -6.307  | 10.395-160.478 | 1.00 | 0.00 | CARC |
| ATOM | 1061 | H62 | BGLC | 11 | -6.183  | 9.231-159.171  | 1.00 | 0.00 | CARC |
| ATOM | 1062 | O6  | BGLC | 11 | -6.887  | 8.540-161.051  | 1.00 | 2.00 | CARC |
| ATOM | 1063 | HO6 | BGLC | 11 | -7.471  | 7.794-160.962  | 1.00 | 0.00 | CARC |
| ATOM | 1064 | C1  | BGLC | 12 | -8.690  | 10.868-163.159 | 1.00 | 2.00 | CARC |
| ATOM | 1065 | H1  | BGLC | 12 | -8.020  | 11.714-163.063 | 1.00 | 0.00 | CARC |
| ATOM | 1066 | C5  | BGLC | 12 | -9.825  | 12.049-164.889 | 1.00 | 2.00 | CARC |
| ATOM | 1067 | H5  | BGLC | 12 | -9.099  | 12.880-164.778 | 1.00 | 0.00 | CARC |
| ATOM | 1068 | O5  | BGLC | 12 | -9.945  | 11.302-163.663 | 1.00 | 2.00 | CARC |
| ATOM | 1069 | C2  | BGLC | 12 | -8.070  | 9.867-164.142  | 1.00 | 2.00 | CARC |
| ATOM | 1070 | H2  | BGLC | 12 | -8.645  | 8.886-164.166  | 1.00 | 0.00 | CARC |
| ATOM | 1071 | O2  | BGLC | 12 | -6.773  | 9.579-163.609  | 1.00 | 2.00 | CARC |
| ATOM | 1072 | HO2 | BGLC | 12 | -6.507  | 8.664-163.596  | 1.00 | 0.00 | CARC |
| ATOM | 1073 | C3  | BGLC | 12 | -7.961  | 10.466-165.525 | 1.00 | 2.00 | CARC |
| ATOM | 1074 | H3  | BGLC | 12 | -7.238  | 11.280-165.482 | 1.00 | 0.00 | CARC |
| ATOM | 1075 | O3  | BGLC | 12 | -7.617  | 9.431-166.470  | 1.00 | 2.00 | CARC |
| ATOM | 1076 | HO3 | BGLC | 12 | -6.753  | 9.050-166.477  | 1.00 | 0.00 | CARC |
| ATOM | 1077 | C4  | BGLC | 12 | -9.247  | 11.159-165.943 | 1.00 | 2.00 | CARC |
| ATOM | 1078 | H4  | BGLC | 12 | -9.960  | 10.370-166.161 | 1.00 | 0.00 | CARC |

|      |      |     |      |    |         |                |      |      |      |
|------|------|-----|------|----|---------|----------------|------|------|------|
| ATOM | 1079 | O4  | BGLC | 12 | -9.185  | 11.812-167.174 | 1.00 | 2.00 | CARC |
| ATOM | 1080 | C6  | BGLC | 12 | -11.211 | 12.572-165.197 | 1.00 | 2.00 | CARC |
| ATOM | 1081 | H61 | BGLC | 12 | -11.734 | 11.666-165.667 | 1.00 | 0.00 | CARC |
| ATOM | 1082 | H62 | BGLC | 12 | -11.857 | 12.835-164.365 | 1.00 | 0.00 | CARC |
| ATOM | 1083 | O6  | BGLC | 12 | -11.156 | 13.519-166.249 | 1.00 | 2.00 | CARC |
| ATOM | 1084 | HO6 | BGLC | 12 | -10.572 | 14.266-166.164 | 1.00 | 0.00 | CARC |
| ATOM | 1085 | C1  | BGLC | 13 | -9.354  | 11.183-168.349 | 1.00 | 2.00 | CARC |
| ATOM | 1086 | H1  | BGLC | 13 | -10.024 | 10.337-168.250 | 1.00 | 0.00 | CARC |
| ATOM | 1087 | C5  | BGLC | 13 | -8.220  | 9.995-170.075  | 1.00 | 2.00 | CARC |
| ATOM | 1088 | H5  | BGLC | 13 | -8.946  | 9.164-169.961  | 1.00 | 0.00 | CARC |
| ATOM | 1089 | O5  | BGLC | 13 | -8.100  | 10.746-168.853 | 1.00 | 2.00 | CARC |
| ATOM | 1090 | C2  | BGLC | 13 | -9.977  | 12.180-169.336 | 1.00 | 2.00 | CARC |
| ATOM | 1091 | H2  | BGLC | 13 | -9.402  | 13.161-169.362 | 1.00 | 0.00 | CARC |
| ATOM | 1092 | O2  | BGLC | 13 | -11.271 | 12.470-168.803 | 1.00 | 2.00 | CARC |
| ATOM | 1093 | HO2 | BGLC | 13 | -11.537 | 13.385-168.794 | 1.00 | 0.00 | CARC |
| ATOM | 1094 | C3  | BGLC | 13 | -10.084 | 11.576-170.717 | 1.00 | 2.00 | CARC |
| ATOM | 1095 | H3  | BGLC | 13 | -10.808 | 10.763-170.669 | 1.00 | 0.00 | CARC |
| ATOM | 1096 | O3  | BGLC | 13 | -10.431 | 12.607-171.665 | 1.00 | 2.00 | CARC |
| ATOM | 1097 | HO3 | BGLC | 13 | -11.296 | 12.986-171.674 | 1.00 | 0.00 | CARC |
| ATOM | 1098 | C4  | BGLC | 13 | -8.800  | 10.880-171.133 | 1.00 | 2.00 | CARC |
| ATOM | 1099 | H4  | BGLC | 13 | -8.087  | 11.668-171.357 | 1.00 | 0.00 | CARC |
| ATOM | 1100 | O4  | BGLC | 13 | -8.865  | 10.223-172.360 | 1.00 | 2.00 | CARC |
| ATOM | 1101 | C6  | BGLC | 13 | -6.834  | 9.470-170.383  | 1.00 | 2.00 | CARC |
| ATOM | 1102 | H61 | BGLC | 13 | -6.312  | 10.374-170.857 | 1.00 | 0.00 | CARC |
| ATOM | 1103 | H62 | BGLC | 13 | -6.187  | 9.210-169.551  | 1.00 | 0.00 | CARC |
| ATOM | 1104 | O6  | BGLC | 13 | -6.890  | 8.519-171.431  | 1.00 | 2.00 | CARC |
| ATOM | 1105 | HO6 | BGLC | 13 | -7.474  | 7.772-171.342  | 1.00 | 0.00 | CARC |
| ATOM | 1106 | C1  | BGLC | 14 | -8.694  | 10.848-173.539 | 1.00 | 2.00 | CARC |
| ATOM | 1107 | H1  | BGLC | 14 | -8.023  | 11.694-173.443 | 1.00 | 0.00 | CARC |
| ATOM | 1108 | C5  | BGLC | 14 | -9.829  | 12.029-175.269 | 1.00 | 2.00 | CARC |
| ATOM | 1109 | H5  | BGLC | 14 | -9.103  | 12.860-175.159 | 1.00 | 0.00 | CARC |
| ATOM | 1110 | O5  | BGLC | 14 | -9.949  | 11.283-174.043 | 1.00 | 2.00 | CARC |
| ATOM | 1111 | C2  | BGLC | 14 | -8.074  | 9.847-174.522  | 1.00 | 2.00 | CARC |
| ATOM | 1112 | H2  | BGLC | 14 | -8.649  | 8.866-174.544  | 1.00 | 0.00 | CARC |
| ATOM | 1113 | O2  | BGLC | 14 | -6.778  | 9.559-173.989  | 1.00 | 2.00 | CARC |
| ATOM | 1114 | HO2 | BGLC | 14 | -6.512  | 8.644-173.976  | 1.00 | 0.00 | CARC |
| ATOM | 1115 | C3  | BGLC | 14 | -7.966  | 10.444-175.905 | 1.00 | 2.00 | CARC |
| ATOM | 1116 | H3  | BGLC | 14 | -7.243  | 11.258-175.861 | 1.00 | 0.00 | CARC |
| ATOM | 1117 | O3  | BGLC | 14 | -7.622  | 9.411-176.850  | 1.00 | 2.00 | CARC |
| ATOM | 1118 | HO3 | BGLC | 14 | -6.758  | 9.030-176.858  | 1.00 | 0.00 | CARC |
| ATOM | 1119 | C4  | BGLC | 14 | -9.251  | 11.138-176.323 | 1.00 | 2.00 | CARC |
| ATOM | 1120 | H4  | BGLC | 14 | -9.965  | 10.350-176.542 | 1.00 | 0.00 | CARC |
| ATOM | 1121 | O4  | BGLC | 14 | -9.188  | 11.792-177.554 | 1.00 | 2.00 | CARC |
| ATOM | 1122 | C6  | BGLC | 14 | -11.216 | 12.551-175.577 | 1.00 | 2.00 | CARC |
| ATOM | 1123 | O61 | BGLC | 14 | -11.237 | 13.966-175.628 | 1.00 | 0.00 | CARC |
| ATOM | 1124 | O62 | BGLC | 14 | -11.894 | 11.700-175.691 | 1.00 | 0.00 | CARC |
| ATOM | 1125 | C1  | BGLC | 15 | -9.359  | 11.162-178.729 | 1.00 | 2.00 | CARC |
| ATOM | 1126 | H1  | BGLC | 15 | -10.029 | 10.316-178.629 | 1.00 | 0.00 | CARC |
| ATOM | 1127 | C5  | BGLC | 15 | -8.225  | 9.974-180.455  | 1.00 | 2.00 | CARC |
| ATOM | 1128 | H5  | BGLC | 15 | -8.951  | 9.143-180.341  | 1.00 | 0.00 | CARC |
| ATOM | 1129 | O5  | BGLC | 15 | -8.105  | 10.725-179.233 | 1.00 | 2.00 | CARC |
| ATOM | 1130 | C2  | BGLC | 15 | -9.981  | 12.160-179.716 | 1.00 | 2.00 | CARC |
| ATOM | 1131 | H2  | BGLC | 15 | -9.407  | 13.142-179.743 | 1.00 | 0.00 | CARC |
| ATOM | 1132 | O2  | BGLC | 15 | -11.276 | 12.449-179.183 | 1.00 | 2.00 | CARC |

|      |      |          |    |         |                |      |      |      |
|------|------|----------|----|---------|----------------|------|------|------|
| ATOM | 1133 | HO2 BGLC | 15 | -11.542 | 13.364-179.173 | 1.00 | 0.00 | CARC |
| ATOM | 1134 | C3 BGLC  | 15 | -10.089 | 11.556-181.097 | 1.00 | 2.00 | CARC |
| ATOM | 1135 | H3 BGLC  | 15 | -10.812 | 10.743-181.050 | 1.00 | 0.00 | CARC |
| ATOM | 1136 | O3 BGLC  | 15 | -10.435 | 12.586-182.045 | 1.00 | 2.00 | CARC |
| ATOM | 1137 | HO3 BGLC | 15 | -11.299 | 12.966-182.054 | 1.00 | 0.00 | CARC |
| ATOM | 1138 | C4 BGLC  | 15 | -8.803  | 10.860-181.513 | 1.00 | 2.00 | CARC |
| ATOM | 1139 | H4 BGLC  | 15 | -8.088  | 11.646-181.737 | 1.00 | 0.00 | CARC |
| ATOM | 1140 | O4 BGLC  | 15 | -8.869  | 10.202-182.740 | 1.00 | 2.00 | CARC |
| ATOM | 1141 | C6 BGLC  | 15 | -6.839  | 9.450-180.763  | 1.00 | 2.00 | CARC |
| ATOM | 1142 | H61 BGLC | 15 | -6.318  | 10.354-181.239 | 1.00 | 0.00 | CARC |
| ATOM | 1143 | H62 BGLC | 15 | -6.192  | 9.191-179.931  | 1.00 | 0.00 | CARC |
| ATOM | 1144 | O6 BGLC  | 15 | -6.895  | 8.497-181.811  | 1.00 | 2.00 | CARC |
| ATOM | 1145 | HO6 BGLC | 15 | -7.478  | 7.750-181.721  | 1.00 | 0.00 | CARC |
| ATOM | 1146 | C1 BGLC  | 16 | -8.699  | 10.827-183.919 | 1.00 | 2.00 | CARC |
| ATOM | 1147 | H1 BGLC  | 16 | -8.029  | 11.673-183.823 | 1.00 | 0.00 | CARC |
| ATOM | 1148 | C5 BGLC  | 16 | -9.834  | 12.008-185.649 | 1.00 | 2.00 | CARC |
| ATOM | 1149 | H5 BGLC  | 16 | -9.108  | 12.839-185.539 | 1.00 | 0.00 | CARC |
| ATOM | 1150 | O5 BGLC  | 16 | -9.953  | 11.261-184.423 | 1.00 | 2.00 | CARC |
| ATOM | 1151 | C2 BGLC  | 16 | -8.079  | 9.825-184.902  | 1.00 | 2.00 | CARC |
| ATOM | 1152 | H2 BGLC  | 16 | -8.653  | 8.843-184.925  | 1.00 | 0.00 | CARC |
| ATOM | 1153 | O2 BGLC  | 16 | -6.783  | 9.539-184.369  | 1.00 | 2.00 | CARC |
| ATOM | 1154 | HO2 BGLC | 16 | -6.516  | 8.624-184.355  | 1.00 | 0.00 | CARC |
| ATOM | 1155 | C3 BGLC  | 16 | -7.971  | 10.423-186.285 | 1.00 | 2.00 | CARC |
| ATOM | 1156 | H3 BGLC  | 16 | -7.248  | 11.237-186.240 | 1.00 | 0.00 | CARC |
| ATOM | 1157 | O3 BGLC  | 16 | -7.625  | 9.390-187.230  | 1.00 | 2.00 | CARC |
| ATOM | 1158 | HO3 BGLC | 16 | -6.761  | 9.010-187.238  | 1.00 | 0.00 | CARC |
| ATOM | 1159 | C4 BGLC  | 16 | -9.256  | 11.117-186.703 | 1.00 | 2.00 | CARC |
| ATOM | 1160 | H4 BGLC  | 16 | -9.970  | 10.329-186.921 | 1.00 | 0.00 | CARC |
| ATOM | 1161 | O4 BGLC  | 16 | -9.193  | 11.770-187.934 | 1.00 | 2.00 | CARC |
| ATOM | 1162 | C6 BGLC  | 16 | -11.220 | 12.531-185.957 | 1.00 | 2.00 | CARC |
| ATOM | 1163 | H61 BGLC | 16 | -11.743 | 11.625-186.428 | 1.00 | 0.00 | CARC |
| ATOM | 1164 | H62 BGLC | 16 | -11.866 | 12.794-185.125 | 1.00 | 0.00 | CARC |
| ATOM | 1165 | O6 BGLC  | 16 | -11.165 | 13.479-187.009 | 1.00 | 2.00 | CARC |
| ATOM | 1166 | HO6 BGLC | 16 | -10.581 | 14.226-186.924 | 1.00 | 0.00 | CARC |
| ATOM | 1167 | C1 BGLC  | 17 | -9.362  | 11.141-189.109 | 1.00 | 2.00 | CARC |
| ATOM | 1168 | H1 BGLC  | 17 | -10.031 | 10.295-189.010 | 1.00 | 0.00 | CARC |
| ATOM | 1169 | C5 BGLC  | 17 | -8.229  | 9.953-190.835  | 1.00 | 2.00 | CARC |
| ATOM | 1170 | H5 BGLC  | 17 | -8.954  | 9.122-190.721  | 1.00 | 0.00 | CARC |
| ATOM | 1171 | O5 BGLC  | 17 | -8.110  | 10.705-189.613 | 1.00 | 2.00 | CARC |
| ATOM | 1172 | C2 BGLC  | 17 | -9.985  | 12.139-190.096 | 1.00 | 2.00 | CARC |
| ATOM | 1173 | H2 BGLC  | 17 | -9.410  | 13.120-190.123 | 1.00 | 0.00 | CARC |
| ATOM | 1174 | O2 BGLC  | 17 | -11.279 | 12.429-189.563 | 1.00 | 2.00 | CARC |
| ATOM | 1175 | HO2 BGLC | 17 | -11.545 | 13.344-189.554 | 1.00 | 0.00 | CARC |
| ATOM | 1176 | C3 BGLC  | 17 | -10.093 | 11.534-191.477 | 1.00 | 2.00 | CARC |
| ATOM | 1177 | H3 BGLC  | 17 | -10.816 | 10.720-191.431 | 1.00 | 0.00 | CARC |
| ATOM | 1178 | O3 BGLC  | 17 | -10.438 | 12.565-192.425 | 1.00 | 2.00 | CARC |
| ATOM | 1179 | HO3 BGLC | 17 | -11.302 | 12.945-192.434 | 1.00 | 0.00 | CARC |
| ATOM | 1180 | C4 BGLC  | 17 | -8.808  | 10.839-191.893 | 1.00 | 2.00 | CARC |
| ATOM | 1181 | H4 BGLC  | 17 | -8.094  | 11.626-192.116 | 1.00 | 0.00 | CARC |
| ATOM | 1182 | O4 BGLC  | 17 | -8.873  | 10.181-193.120 | 1.00 | 2.00 | CARC |
| ATOM | 1183 | C6 BGLC  | 17 | -6.843  | 9.429-191.143  | 1.00 | 2.00 | CARC |
| ATOM | 1184 | H61 BGLC | 17 | -6.321  | 10.333-191.619 | 1.00 | 0.00 | CARC |
| ATOM | 1185 | H62 BGLC | 17 | -6.196  | 9.170-190.311  | 1.00 | 0.00 | CARC |
| ATOM | 1186 | O6 BGLC  | 17 | -6.900  | 8.477-192.191  | 1.00 | 2.00 | CARC |

|      |      |     |      |    |         |                |      |      |      |
|------|------|-----|------|----|---------|----------------|------|------|------|
| ATOM | 1187 | HO6 | BGLC | 17 | -7.484  | 7.730-192.101  | 1.00 | 0.00 | CARC |
| ATOM | 1188 | C1  | BGLC | 18 | -8.704  | 10.807-194.299 | 1.00 | 2.00 | CARC |
| ATOM | 1189 | H1  | BGLC | 18 | -8.034  | 11.654-194.203 | 1.00 | 0.00 | CARC |
| ATOM | 1190 | C5  | BGLC | 18 | -9.838  | 11.986-196.029 | 1.00 | 2.00 | CARC |
| ATOM | 1191 | H5  | BGLC | 18 | -9.111  | 12.817-195.920 | 1.00 | 0.00 | CARC |
| ATOM | 1192 | O5  | BGLC | 18 | -9.957  | 11.241-194.803 | 1.00 | 2.00 | CARC |
| ATOM | 1193 | C2  | BGLC | 18 | -8.084  | 9.805-195.282  | 1.00 | 2.00 | CARC |
| ATOM | 1194 | H2  | BGLC | 18 | -8.659  | 8.824-195.305  | 1.00 | 0.00 | CARC |
| ATOM | 1195 | O2  | BGLC | 18 | -6.788  | 9.517-194.749  | 1.00 | 2.00 | CARC |
| ATOM | 1196 | HO2 | BGLC | 18 | -6.522  | 8.602-194.736  | 1.00 | 0.00 | CARC |
| ATOM | 1197 | C3  | BGLC | 18 | -7.976  | 10.403-196.665 | 1.00 | 2.00 | CARC |
| ATOM | 1198 | H3  | BGLC | 18 | -7.253  | 11.216-196.622 | 1.00 | 0.00 | CARC |
| ATOM | 1199 | O3  | BGLC | 18 | -7.630  | 9.368-197.609  | 1.00 | 2.00 | CARC |
| ATOM | 1200 | HO3 | BGLC | 18 | -6.766  | 8.988-197.616  | 1.00 | 0.00 | CARC |
| ATOM | 1201 | C4  | BGLC | 18 | -9.261  | 11.097-197.083 | 1.00 | 2.00 | CARC |
| ATOM | 1202 | H4  | BGLC | 18 | -9.975  | 10.309-197.302 | 1.00 | 0.00 | CARC |
| ATOM | 1203 | O4  | BGLC | 18 | -9.197  | 11.750-198.314 | 1.00 | 2.00 | CARC |
| ATOM | 1204 | C6  | BGLC | 18 | -11.225 | 12.510-196.337 | 1.00 | 2.00 | CARC |
| ATOM | 1205 | H61 | BGLC | 18 | -11.748 | 11.605-196.808 | 1.00 | 0.00 | CARC |
| ATOM | 1206 | H62 | BGLC | 18 | -11.871 | 12.773-195.505 | 1.00 | 0.00 | CARC |
| ATOM | 1207 | O6  | BGLC | 18 | -11.169 | 13.458-197.389 | 1.00 | 2.00 | CARC |
| ATOM | 1208 | HO6 | BGLC | 18 | -10.584 | 14.205-197.303 | 1.00 | 0.00 | CARC |
| ATOM | 1209 | C1  | BGLC | 19 | -9.367  | 11.121-199.489 | 1.00 | 2.00 | CARC |
| ATOM | 1210 | H1  | BGLC | 19 | -10.037 | 10.275-199.390 | 1.00 | 0.00 | CARC |
| ATOM | 1211 | C5  | BGLC | 19 | -8.234  | 9.933-201.215  | 1.00 | 2.00 | CARC |
| ATOM | 1212 | H5  | BGLC | 19 | -8.960  | 9.102-201.100  | 1.00 | 0.00 | CARC |
| ATOM | 1213 | O5  | BGLC | 19 | -8.113  | 10.684-199.993 | 1.00 | 2.00 | CARC |
| ATOM | 1214 | C2  | BGLC | 19 | -9.989  | 12.119-200.476 | 1.00 | 2.00 | CARC |
| ATOM | 1215 | H2  | BGLC | 19 | -9.416  | 13.101-200.504 | 1.00 | 0.00 | CARC |
| ATOM | 1216 | O2  | BGLC | 19 | -11.284 | 12.407-199.943 | 1.00 | 2.00 | CARC |
| ATOM | 1217 | HO2 | BGLC | 19 | -11.551 | 13.322-199.933 | 1.00 | 0.00 | CARC |
| ATOM | 1218 | C3  | BGLC | 19 | -10.097 | 11.514-201.857 | 1.00 | 2.00 | CARC |
| ATOM | 1219 | H3  | BGLC | 19 | -10.820 | 10.701-201.810 | 1.00 | 0.00 | CARC |
| ATOM | 1220 | O3  | BGLC | 19 | -10.443 | 12.545-202.805 | 1.00 | 2.00 | CARC |
| ATOM | 1221 | HO3 | BGLC | 19 | -11.307 | 12.925-202.813 | 1.00 | 0.00 | CARC |
| ATOM | 1222 | C4  | BGLC | 19 | -8.813  | 10.819-202.273 | 1.00 | 2.00 | CARC |
| ATOM | 1223 | H4  | BGLC | 19 | -8.099  | 11.606-202.496 | 1.00 | 0.00 | CARC |
| ATOM | 1224 | O4  | BGLC | 19 | -8.878  | 10.160-203.500 | 1.00 | 2.00 | CARC |
| ATOM | 1225 | C6  | BGLC | 19 | -6.848  | 9.409-201.523  | 1.00 | 2.00 | CARC |
| ATOM | 1226 | H61 | BGLC | 19 | -6.326  | 10.312-201.999 | 1.00 | 0.00 | CARC |
| ATOM | 1227 | H62 | BGLC | 19 | -6.201  | 9.150-200.691  | 1.00 | 0.00 | CARC |
| ATOM | 1228 | O6  | BGLC | 19 | -6.905  | 8.456-202.571  | 1.00 | 2.00 | CARC |
| ATOM | 1229 | HO6 | BGLC | 19 | -7.489  | 7.709-202.481  | 1.00 | 0.00 | CARC |
| ATOM | 1230 | C1  | BGLC | 20 | -8.709  | 10.786-204.679 | 1.00 | 2.00 | CARC |
| ATOM | 1231 | H1  | BGLC | 20 | -8.039  | 11.633-204.583 | 1.00 | 0.00 | CARC |
| ATOM | 1232 | C5  | BGLC | 20 | -9.843  | 11.966-206.409 | 1.00 | 2.00 | CARC |
| ATOM | 1233 | H5  | BGLC | 20 | -9.117  | 12.797-206.299 | 1.00 | 0.00 | CARC |
| ATOM | 1234 | O5  | BGLC | 20 | -9.962  | 11.220-205.183 | 1.00 | 2.00 | CARC |
| ATOM | 1235 | C2  | BGLC | 20 | -8.087  | 9.784-205.662  | 1.00 | 2.00 | CARC |
| ATOM | 1236 | H2  | BGLC | 20 | -8.662  | 8.803-205.684  | 1.00 | 0.00 | CARC |
| ATOM | 1237 | O2  | BGLC | 20 | -6.791  | 9.496-205.129  | 1.00 | 2.00 | CARC |
| ATOM | 1238 | HO2 | BGLC | 20 | -6.525  | 8.581-205.116  | 1.00 | 0.00 | CARC |
| ATOM | 1239 | C3  | BGLC | 20 | -7.980  | 10.382-207.045 | 1.00 | 2.00 | CARC |
| ATOM | 1240 | H3  | BGLC | 20 | -7.257  | 11.196-207.002 | 1.00 | 0.00 | CARC |

|      |      |     |      |    |         |                |      |      |      |
|------|------|-----|------|----|---------|----------------|------|------|------|
| ATOM | 1241 | O3  | BGLC | 20 | -7.635  | 9.347-207.989  | 1.00 | 2.00 | CARC |
| ATOM | 1242 | HO3 | BGLC | 20 | -6.771  | 8.967-207.997  | 1.00 | 0.00 | CARC |
| ATOM | 1243 | C4  | BGLC | 20 | -9.265  | 11.075-207.463 | 1.00 | 2.00 | CARC |
| ATOM | 1244 | H4  | BGLC | 20 | -10.016 | 10.347-207.752 | 1.00 | 0.00 | CARC |
| ATOM | 1245 | O4  | BGLC | 20 | -9.094  | 11.821-208.684 | 1.00 | 2.00 | CARC |
| ATOM | 1246 | HO4 | BGLC | 20 | -8.630  | 11.254-209.352 | 1.00 | 0.00 | CARC |
| ATOM | 1247 | C6  | BGLC | 20 | -11.230 | 12.489-206.717 | 1.00 | 2.00 | CARC |
| ATOM | 1248 | H61 | BGLC | 20 | -11.753 | 11.584-207.189 | 1.00 | 0.00 | CARC |
| ATOM | 1249 | H62 | BGLC | 20 | -11.876 | 12.751-205.885 | 1.00 | 0.00 | CARC |
| ATOM | 1250 | O6  | BGLC | 20 | -11.173 | 13.437-207.769 | 1.00 | 2.00 | CARC |
| ATOM | 1251 | HO6 | BGLC | 20 | -10.589 | 14.184-207.683 | 1.00 | 0.00 | CARC |
| ATOM | 1252 | C1  | BGLC | 1  | -3.330  | 5.712-106.061  | 1.00 | 2.00 | CARD |
| ATOM | 1253 | H1  | BGLC | 1  | -4.088  | 4.949-105.929  | 1.00 | 0.00 | CARD |
| ATOM | 1254 | O1  | BGLC | 1  | -3.055  | 6.433-104.875  | 1.00 | 2.00 | CARD |
| ATOM | 1255 | HO1 | BGLC | 1  | -2.669  | 7.240-105.139  | 1.00 | 0.00 | CARD |
| ATOM | 1256 | C5  | BGLC | 1  | -2.198  | 4.524-107.787  | 1.00 | 2.00 | CARD |
| ATOM | 1257 | H5  | BGLC | 1  | -2.924  | 3.693-107.672  | 1.00 | 0.00 | CARD |
| ATOM | 1258 | O5  | BGLC | 1  | -2.078  | 5.276-106.565  | 1.00 | 2.00 | CARD |
| ATOM | 1259 | C2  | BGLC | 1  | -3.954  | 6.709-107.048  | 1.00 | 2.00 | CARD |
| ATOM | 1260 | H2  | BGLC | 1  | -3.379  | 7.690-107.074  | 1.00 | 0.00 | CARD |
| ATOM | 1261 | O2  | BGLC | 1  | -5.248  | 6.999-106.515  | 1.00 | 2.00 | CARD |
| ATOM | 1262 | HO2 | BGLC | 1  | -5.514  | 7.914-106.506  | 1.00 | 0.00 | CARD |
| ATOM | 1263 | C3  | BGLC | 1  | -4.061  | 6.106-108.428  | 1.00 | 2.00 | CARD |
| ATOM | 1264 | H3  | BGLC | 1  | -4.785  | 5.293-108.380  | 1.00 | 0.00 | CARD |
| ATOM | 1265 | O3  | BGLC | 1  | -4.408  | 7.136-109.376  | 1.00 | 2.00 | CARD |
| ATOM | 1266 | HO3 | BGLC | 1  | -5.273  | 7.515-109.385  | 1.00 | 0.00 | CARD |
| ATOM | 1267 | C4  | BGLC | 1  | -2.777  | 5.410-108.844  | 1.00 | 2.00 | CARD |
| ATOM | 1268 | H4  | BGLC | 1  | -2.063  | 6.197-109.067  | 1.00 | 0.00 | CARD |
| ATOM | 1269 | O4  | BGLC | 1  | -2.841  | 4.752-110.071  | 1.00 | 2.00 | CARD |
| ATOM | 1270 | C6  | BGLC | 1  | -0.812  | 4.000-108.095  | 1.00 | 2.00 | CARD |
| ATOM | 1271 | H61 | BGLC | 1  | -0.290  | 4.904-108.570  | 1.00 | 0.00 | CARD |
| ATOM | 1272 | H62 | BGLC | 1  | -0.165  | 3.740-107.263  | 1.00 | 0.00 | CARD |
| ATOM | 1273 | O6  | BGLC | 1  | -0.868  | 3.049-109.143  | 1.00 | 2.00 | CARD |
| ATOM | 1274 | HO6 | BGLC | 1  | -1.452  | 2.302-109.054  | 1.00 | 0.00 | CARD |
| ATOM | 1275 | C1  | BGLC | 2  | -2.673  | 5.377-111.250  | 1.00 | 2.00 | CARD |
| ATOM | 1276 | H1  | BGLC | 2  | -2.003  | 6.224-111.155  | 1.00 | 0.00 | CARD |
| ATOM | 1277 | C5  | BGLC | 2  | -3.808  | 6.558-112.980  | 1.00 | 2.00 | CARD |
| ATOM | 1278 | H5  | BGLC | 2  | -3.082  | 7.390-112.870  | 1.00 | 0.00 | CARD |
| ATOM | 1279 | O5  | BGLC | 2  | -3.927  | 5.812-111.755  | 1.00 | 2.00 | CARD |
| ATOM | 1280 | C2  | BGLC | 2  | -2.051  | 4.376-112.234  | 1.00 | 2.00 | CARD |
| ATOM | 1281 | H2  | BGLC | 2  | -2.626  | 3.395-112.256  | 1.00 | 0.00 | CARD |
| ATOM | 1282 | O2  | BGLC | 2  | -0.755  | 4.088-111.701  | 1.00 | 2.00 | CARD |
| ATOM | 1283 | HO2 | BGLC | 2  | -0.489  | 3.173-111.689  | 1.00 | 0.00 | CARD |
| ATOM | 1284 | C3  | BGLC | 2  | -1.944  | 4.973-113.617  | 1.00 | 2.00 | CARD |
| ATOM | 1285 | H3  | BGLC | 2  | -1.221  | 5.786-113.572  | 1.00 | 0.00 | CARD |
| ATOM | 1286 | O3  | BGLC | 2  | -1.599  | 3.941-114.561  | 1.00 | 2.00 | CARD |
| ATOM | 1287 | HO3 | BGLC | 2  | -0.735  | 3.562-114.569  | 1.00 | 0.00 | CARD |
| ATOM | 1288 | C4  | BGLC | 2  | -3.230  | 5.668-114.035  | 1.00 | 2.00 | CARD |
| ATOM | 1289 | H4  | BGLC | 2  | -3.944  | 4.881-114.255  | 1.00 | 0.00 | CARD |
| ATOM | 1290 | O4  | BGLC | 2  | -3.166  | 6.322-115.264  | 1.00 | 2.00 | CARD |
| ATOM | 1291 | C6  | BGLC | 2  | -5.194  | 7.080-113.289  | 1.00 | 2.00 | CARD |
| ATOM | 1292 | H61 | BGLC | 2  | -5.716  | 6.174-113.761  | 1.00 | 0.00 | CARD |
| ATOM | 1293 | H62 | BGLC | 2  | -5.841  | 7.342-112.458  | 1.00 | 0.00 | CARD |
| ATOM | 1294 | O6  | BGLC | 2  | -5.138  | 8.028-114.341  | 1.00 | 2.00 | CARD |



|      |      |     |      |   |        |               |      |      |      |
|------|------|-----|------|---|--------|---------------|------|------|------|
| ATOM | 1295 | HO6 | BGLC | 2 | -4.554 | 8.775-114.255 | 1.00 | 0.00 | CARD |
| ATOM | 1296 | C1  | BGLC | 3 | -3.335 | 5.692-116.441 | 1.00 | 2.00 | CARD |
| ATOM | 1297 | H1  | BGLC | 3 | -4.005 | 4.846-116.342 | 1.00 | 0.00 | CARD |
| ATOM | 1298 | C5  | BGLC | 3 | -2.203 | 4.504-118.167 | 1.00 | 2.00 | CARD |
| ATOM | 1299 | H5  | BGLC | 3 | -2.929 | 3.673-118.052 | 1.00 | 0.00 | CARD |
| ATOM | 1300 | O5  | BGLC | 3 | -2.082 | 5.255-116.945 | 1.00 | 2.00 | CARD |
| ATOM | 1301 | C2  | BGLC | 3 | -3.958 | 6.689-117.428 | 1.00 | 2.00 | CARD |
| ATOM | 1302 | H2  | BGLC | 3 | -3.385 | 7.671-117.455 | 1.00 | 0.00 | CARD |
| ATOM | 1303 | O2  | BGLC | 3 | -5.253 | 6.977-116.895 | 1.00 | 2.00 | CARD |
| ATOM | 1304 | HO2 | BGLC | 3 | -5.520 | 7.891-116.885 | 1.00 | 0.00 | CARD |
| ATOM | 1305 | C3  | BGLC | 3 | -4.066 | 6.085-118.808 | 1.00 | 2.00 | CARD |
| ATOM | 1306 | H3  | BGLC | 3 | -4.789 | 5.272-118.760 | 1.00 | 0.00 | CARD |
| ATOM | 1307 | O3  | BGLC | 3 | -4.412 | 7.115-119.756 | 1.00 | 2.00 | CARD |
| ATOM | 1308 | HO3 | BGLC | 3 | -5.276 | 7.495-119.765 | 1.00 | 0.00 | CARD |
| ATOM | 1309 | C4  | BGLC | 3 | -2.781 | 5.389-119.224 | 1.00 | 2.00 | CARD |
| ATOM | 1310 | H4  | BGLC | 3 | -2.067 | 6.176-119.447 | 1.00 | 0.00 | CARD |
| ATOM | 1311 | O4  | BGLC | 3 | -2.846 | 4.731-120.451 | 1.00 | 2.00 | CARD |
| ATOM | 1312 | C6  | BGLC | 3 | -0.817 | 3.980-118.475 | 1.00 | 2.00 | CARD |
| ATOM | 1313 | H61 | BGLC | 3 | -0.295 | 4.884-118.951 | 1.00 | 0.00 | CARD |
| ATOM | 1314 | H62 | BGLC | 3 | -0.170 | 3.721-117.643 | 1.00 | 0.00 | CARD |
| ATOM | 1315 | O6  | BGLC | 3 | -0.874 | 3.028-119.523 | 1.00 | 2.00 | CARD |
| ATOM | 1316 | HO6 | BGLC | 3 | -1.458 | 2.281-119.433 | 1.00 | 0.00 | CARD |
| ATOM | 1317 | C1  | BGLC | 4 | -2.678 | 5.356-121.630 | 1.00 | 2.00 | CARD |
| ATOM | 1318 | H1  | BGLC | 4 | -2.009 | 6.203-121.535 | 1.00 | 0.00 | CARD |
| ATOM | 1319 | C5  | BGLC | 4 | -3.813 | 6.538-123.360 | 1.00 | 2.00 | CARD |
| ATOM | 1320 | H5  | BGLC | 4 | -3.088 | 7.370-123.249 | 1.00 | 0.00 | CARD |
| ATOM | 1321 | O5  | BGLC | 4 | -3.931 | 5.790-122.135 | 1.00 | 2.00 | CARD |
| ATOM | 1322 | C2  | BGLC | 4 | -2.056 | 4.355-122.614 | 1.00 | 2.00 | CARD |
| ATOM | 1323 | H2  | BGLC | 4 | -2.631 | 3.374-122.636 | 1.00 | 0.00 | CARD |
| ATOM | 1324 | O2  | BGLC | 4 | -0.759 | 4.067-122.081 | 1.00 | 2.00 | CARD |
| ATOM | 1325 | HO2 | BGLC | 4 | -0.493 | 3.152-122.069 | 1.00 | 0.00 | CARD |
| ATOM | 1326 | C3  | BGLC | 4 | -1.949 | 4.953-123.997 | 1.00 | 2.00 | CARD |
| ATOM | 1327 | H3  | BGLC | 4 | -1.225 | 5.766-123.953 | 1.00 | 0.00 | CARD |
| ATOM | 1328 | O3  | BGLC | 4 | -1.604 | 3.920-124.941 | 1.00 | 2.00 | CARD |
| ATOM | 1329 | HO3 | BGLC | 4 | -0.740 | 3.540-124.949 | 1.00 | 0.00 | CARD |
| ATOM | 1330 | C4  | BGLC | 4 | -3.234 | 5.648-124.415 | 1.00 | 2.00 | CARD |
| ATOM | 1331 | H4  | BGLC | 4 | -3.947 | 4.859-124.634 | 1.00 | 0.00 | CARD |
| ATOM | 1332 | O4  | BGLC | 4 | -3.171 | 6.300-125.644 | 1.00 | 2.00 | CARD |
| ATOM | 1333 | C6  | BGLC | 4 | -5.198 | 7.060-123.669 | 1.00 | 2.00 | CARD |
| ATOM | 1334 | H61 | BGLC | 4 | -5.720 | 6.154-124.140 | 1.00 | 0.00 | CARD |
| ATOM | 1335 | H62 | BGLC | 4 | -5.845 | 7.322-122.838 | 1.00 | 0.00 | CARD |
| ATOM | 1336 | O6  | BGLC | 4 | -5.143 | 8.008-124.721 | 1.00 | 2.00 | CARD |
| ATOM | 1337 | HO6 | BGLC | 4 | -4.560 | 8.756-124.635 | 1.00 | 0.00 | CARD |
| ATOM | 1338 | C1  | BGLC | 5 | -3.340 | 5.670-126.821 | 1.00 | 2.00 | CARD |
| ATOM | 1339 | H1  | BGLC | 5 | -4.009 | 4.823-126.722 | 1.00 | 0.00 | CARD |
| ATOM | 1340 | C5  | BGLC | 5 | -2.206 | 4.483-128.547 | 1.00 | 2.00 | CARD |
| ATOM | 1341 | H5  | BGLC | 5 | -2.932 | 3.652-128.433 | 1.00 | 0.00 | CARD |
| ATOM | 1342 | O5  | BGLC | 5 | -2.087 | 5.235-127.324 | 1.00 | 2.00 | CARD |
| ATOM | 1343 | C2  | BGLC | 5 | -3.963 | 6.669-127.808 | 1.00 | 2.00 | CARD |
| ATOM | 1344 | H2  | BGLC | 5 | -3.390 | 7.651-127.835 | 1.00 | 0.00 | CARD |
| ATOM | 1345 | O2  | BGLC | 5 | -5.258 | 6.957-127.275 | 1.00 | 2.00 | CARD |
| ATOM | 1346 | HO2 | BGLC | 5 | -5.525 | 7.872-127.265 | 1.00 | 0.00 | CARD |
| ATOM | 1347 | C3  | BGLC | 5 | -4.071 | 6.065-129.188 | 1.00 | 2.00 | CARD |
| ATOM | 1348 | H3  | BGLC | 5 | -4.795 | 5.252-129.140 | 1.00 | 0.00 | CARD |

|      |      |     |      |   |        |               |      |      |      |
|------|------|-----|------|---|--------|---------------|------|------|------|
| ATOM | 1349 | O3  | BGLC | 5 | -4.417 | 7.094-130.136 | 1.00 | 2.00 | CARD |
| ATOM | 1350 | HO3 | BGLC | 5 | -5.281 | 7.474-130.145 | 1.00 | 0.00 | CARD |
| ATOM | 1351 | C4  | BGLC | 5 | -2.786 | 5.368-129.604 | 1.00 | 2.00 | CARD |
| ATOM | 1352 | H4  | BGLC | 5 | -2.073 | 6.156-129.827 | 1.00 | 0.00 | CARD |
| ATOM | 1353 | O4  | BGLC | 5 | -2.850 | 4.710-130.831 | 1.00 | 2.00 | CARD |
| ATOM | 1354 | C6  | BGLC | 5 | -0.821 | 3.959-128.854 | 1.00 | 2.00 | CARD |
| ATOM | 1355 | H61 | BGLC | 5 | -0.298 | 4.862-129.329 | 1.00 | 0.00 | CARD |
| ATOM | 1356 | H62 | BGLC | 5 | -0.174 | 3.699-128.022 | 1.00 | 0.00 | CARD |
| ATOM | 1357 | O6  | BGLC | 5 | -0.878 | 3.007-129.903 | 1.00 | 2.00 | CARD |
| ATOM | 1358 | HO6 | BGLC | 5 | -1.462 | 2.261-129.814 | 1.00 | 0.00 | CARD |
| ATOM | 1359 | C1  | BGLC | 6 | -2.683 | 5.336-132.010 | 1.00 | 2.00 | CARD |
| ATOM | 1360 | H1  | BGLC | 6 | -2.015 | 6.184-131.915 | 1.00 | 0.00 | CARD |
| ATOM | 1361 | C5  | BGLC | 6 | -3.816 | 6.516-133.740 | 1.00 | 2.00 | CARD |
| ATOM | 1362 | H5  | BGLC | 6 | -3.090 | 7.347-133.629 | 1.00 | 0.00 | CARD |
| ATOM | 1363 | O5  | BGLC | 6 | -3.936 | 5.769-132.515 | 1.00 | 2.00 | CARD |
| ATOM | 1364 | C2  | BGLC | 6 | -2.059 | 4.335-132.994 | 1.00 | 2.00 | CARD |
| ATOM | 1365 | H2  | BGLC | 6 | -2.634 | 3.354-133.015 | 1.00 | 0.00 | CARD |
| ATOM | 1366 | O2  | BGLC | 6 | -0.764 | 4.047-132.461 | 1.00 | 2.00 | CARD |
| ATOM | 1367 | HO2 | BGLC | 6 | -0.498 | 3.132-132.449 | 1.00 | 0.00 | CARD |
| ATOM | 1368 | C3  | BGLC | 6 | -1.954 | 4.932-134.377 | 1.00 | 2.00 | CARD |
| ATOM | 1369 | H3  | BGLC | 6 | -1.230 | 5.745-134.333 | 1.00 | 0.00 | CARD |
| ATOM | 1370 | O3  | BGLC | 6 | -1.609 | 3.898-135.321 | 1.00 | 2.00 | CARD |
| ATOM | 1371 | HO3 | BGLC | 6 | -0.744 | 3.519-135.330 | 1.00 | 0.00 | CARD |
| ATOM | 1372 | C4  | BGLC | 6 | -3.238 | 5.626-134.795 | 1.00 | 2.00 | CARD |
| ATOM | 1373 | H4  | BGLC | 6 | -3.952 | 4.839-135.015 | 1.00 | 0.00 | CARD |
| ATOM | 1374 | O4  | BGLC | 6 | -3.174 | 6.280-136.024 | 1.00 | 2.00 | CARD |
| ATOM | 1375 | C6  | BGLC | 6 | -5.202 | 7.039-134.049 | 1.00 | 2.00 | CARD |
| ATOM | 1376 | H61 | BGLC | 6 | -5.724 | 6.133-134.519 | 1.00 | 0.00 | CARD |
| ATOM | 1377 | H62 | BGLC | 6 | -5.848 | 7.302-133.218 | 1.00 | 0.00 | CARD |
| ATOM | 1378 | O6  | BGLC | 6 | -5.148 | 7.986-135.101 | 1.00 | 2.00 | CARD |
| ATOM | 1379 | HO6 | BGLC | 6 | -4.564 | 8.734-135.016 | 1.00 | 0.00 | CARD |
| ATOM | 1380 | C1  | BGLC | 7 | -3.345 | 5.650-137.201 | 1.00 | 2.00 | CARD |
| ATOM | 1381 | H1  | BGLC | 7 | -4.015 | 4.804-137.101 | 1.00 | 0.00 | CARD |
| ATOM | 1382 | C5  | BGLC | 7 | -2.211 | 4.463-138.927 | 1.00 | 2.00 | CARD |
| ATOM | 1383 | H5  | BGLC | 7 | -2.937 | 3.632-138.814 | 1.00 | 0.00 | CARD |
| ATOM | 1384 | O5  | BGLC | 7 | -2.092 | 5.214-137.704 | 1.00 | 2.00 | CARD |
| ATOM | 1385 | C2  | BGLC | 7 | -3.967 | 6.647-138.188 | 1.00 | 2.00 | CARD |
| ATOM | 1386 | H2  | BGLC | 7 | -3.392 | 7.628-138.215 | 1.00 | 0.00 | CARD |
| ATOM | 1387 | O2  | BGLC | 7 | -5.262 | 6.936-137.655 | 1.00 | 2.00 | CARD |
| ATOM | 1388 | HO2 | BGLC | 7 | -5.528 | 7.851-137.645 | 1.00 | 0.00 | CARD |
| ATOM | 1389 | C3  | BGLC | 7 | -4.076 | 6.044-139.568 | 1.00 | 2.00 | CARD |
| ATOM | 1390 | H3  | BGLC | 7 | -4.799 | 5.231-139.520 | 1.00 | 0.00 | CARD |
| ATOM | 1391 | O3  | BGLC | 7 | -4.422 | 7.073-140.516 | 1.00 | 2.00 | CARD |
| ATOM | 1392 | HO3 | BGLC | 7 | -5.286 | 7.453-140.525 | 1.00 | 0.00 | CARD |
| ATOM | 1393 | C4  | BGLC | 7 | -2.791 | 5.348-139.984 | 1.00 | 2.00 | CARD |
| ATOM | 1394 | H4  | BGLC | 7 | -2.078 | 6.136-140.207 | 1.00 | 0.00 | CARD |
| ATOM | 1395 | O4  | BGLC | 7 | -2.855 | 4.690-141.211 | 1.00 | 2.00 | CARD |
| ATOM | 1396 | C6  | BGLC | 7 | -0.826 | 3.939-139.234 | 1.00 | 2.00 | CARD |
| ATOM | 1397 | H61 | BGLC | 7 | -0.304 | 4.843-139.709 | 1.00 | 0.00 | CARD |
| ATOM | 1398 | H62 | BGLC | 7 | -0.179 | 3.680-138.402 | 1.00 | 0.00 | CARD |
| ATOM | 1399 | O6  | BGLC | 7 | -0.882 | 2.986-140.283 | 1.00 | 2.00 | CARD |
| ATOM | 1400 | HO6 | BGLC | 7 | -1.466 | 2.239-140.194 | 1.00 | 0.00 | CARD |
| ATOM | 1401 | C1  | BGLC | 8 | -2.686 | 5.315-142.390 | 1.00 | 2.00 | CARD |
| ATOM | 1402 | H1  | BGLC | 8 | -2.017 | 6.162-142.295 | 1.00 | 0.00 | CARD |

|      |      |     |      |    |        |               |      |      |      |
|------|------|-----|------|----|--------|---------------|------|------|------|
| ATOM | 1403 | C5  | BGLC | 8  | -3.821 | 6.495-144.120 | 1.00 | 2.00 | CARD |
| ATOM | 1404 | H5  | BGLC | 8  | -3.094 | 7.326-144.010 | 1.00 | 0.00 | CARD |
| ATOM | 1405 | O5  | BGLC | 8  | -3.940 | 5.749-142.895 | 1.00 | 2.00 | CARD |
| ATOM | 1406 | C2  | BGLC | 8  | -2.064 | 4.314-143.374 | 1.00 | 2.00 | CARD |
| ATOM | 1407 | H2  | BGLC | 8  | -2.638 | 3.332-143.395 | 1.00 | 0.00 | CARD |
| ATOM | 1408 | O2  | BGLC | 8  | -0.769 | 4.027-142.841 | 1.00 | 2.00 | CARD |
| ATOM | 1409 | HO2 | BGLC | 8  | -0.503 | 3.112-142.828 | 1.00 | 0.00 | CARD |
| ATOM | 1410 | C3  | BGLC | 8  | -1.958 | 4.911-144.757 | 1.00 | 2.00 | CARD |
| ATOM | 1411 | H3  | BGLC | 8  | -1.235 | 5.725-144.713 | 1.00 | 0.00 | CARD |
| ATOM | 1412 | O3  | BGLC | 8  | -1.612 | 3.878-145.701 | 1.00 | 2.00 | CARD |
| ATOM | 1413 | HO3 | BGLC | 8  | -0.747 | 3.499-145.709 | 1.00 | 0.00 | CARD |
| ATOM | 1414 | C4  | BGLC | 8  | -3.243 | 5.605-145.175 | 1.00 | 2.00 | CARD |
| ATOM | 1415 | H4  | BGLC | 8  | -3.957 | 4.818-145.395 | 1.00 | 0.00 | CARD |
| ATOM | 1416 | O4  | BGLC | 8  | -3.179 | 6.259-146.404 | 1.00 | 2.00 | CARD |
| ATOM | 1417 | C6  | BGLC | 8  | -5.206 | 7.019-144.429 | 1.00 | 2.00 | CARD |
| ATOM | 1418 | H61 | BGLC | 8  | -5.729 | 6.113-144.899 | 1.00 | 0.00 | CARD |
| ATOM | 1419 | H62 | BGLC | 8  | -5.852 | 7.283-143.598 | 1.00 | 0.00 | CARD |
| ATOM | 1420 | O6  | BGLC | 8  | -5.151 | 7.966-145.481 | 1.00 | 2.00 | CARD |
| ATOM | 1421 | HO6 | BGLC | 8  | -4.567 | 8.713-145.396 | 1.00 | 0.00 | CARD |
| ATOM | 1422 | C1  | BGLC | 9  | -3.348 | 5.629-147.581 | 1.00 | 2.00 | CARD |
| ATOM | 1423 | H1  | BGLC | 9  | -4.018 | 4.783-147.482 | 1.00 | 0.00 | CARD |
| ATOM | 1424 | C5  | BGLC | 9  | -2.215 | 4.441-149.307 | 1.00 | 2.00 | CARD |
| ATOM | 1425 | H5  | BGLC | 9  | -2.941 | 3.610-149.193 | 1.00 | 0.00 | CARD |
| ATOM | 1426 | O5  | BGLC | 9  | -2.096 | 5.193-148.084 | 1.00 | 2.00 | CARD |
| ATOM | 1427 | C2  | BGLC | 9  | -3.972 | 6.626-148.568 | 1.00 | 2.00 | CARD |
| ATOM | 1428 | H2  | BGLC | 9  | -3.397 | 7.607-148.593 | 1.00 | 0.00 | CARD |
| ATOM | 1429 | O2  | BGLC | 9  | -5.267 | 6.916-148.035 | 1.00 | 2.00 | CARD |
| ATOM | 1430 | HO2 | BGLC | 9  | -5.533 | 7.831-148.026 | 1.00 | 0.00 | CARD |
| ATOM | 1431 | C3  | BGLC | 9  | -4.080 | 6.025-149.948 | 1.00 | 2.00 | CARD |
| ATOM | 1432 | H3  | BGLC | 9  | -4.804 | 5.213-149.899 | 1.00 | 0.00 | CARD |
| ATOM | 1433 | O3  | BGLC | 9  | -4.425 | 7.053-150.896 | 1.00 | 2.00 | CARD |
| ATOM | 1434 | HO3 | BGLC | 9  | -5.289 | 7.433-150.905 | 1.00 | 0.00 | CARD |
| ATOM | 1435 | C4  | BGLC | 9  | -2.796 | 5.327-150.364 | 1.00 | 2.00 | CARD |
| ATOM | 1436 | H4  | BGLC | 9  | -2.084 | 6.116-150.586 | 1.00 | 0.00 | CARD |
| ATOM | 1437 | O4  | BGLC | 9  | -2.858 | 4.668-151.591 | 1.00 | 2.00 | CARD |
| ATOM | 1438 | C6  | BGLC | 9  | -0.831 | 3.917-149.614 | 1.00 | 2.00 | CARD |
| ATOM | 1439 | H61 | BGLC | 9  | -0.308 | 4.821-150.088 | 1.00 | 0.00 | CARD |
| ATOM | 1440 | H62 | BGLC | 9  | -0.185 | 3.657-148.782 | 1.00 | 0.00 | CARD |
| ATOM | 1441 | O6  | BGLC | 9  | -0.887 | 2.966-150.663 | 1.00 | 2.00 | CARD |
| ATOM | 1442 | HO6 | BGLC | 9  | -1.471 | 2.219-150.575 | 1.00 | 0.00 | CARD |
| ATOM | 1443 | C1  | BGLC | 10 | -2.691 | 5.294-152.770 | 1.00 | 2.00 | CARD |
| ATOM | 1444 | H1  | BGLC | 10 | -2.022 | 6.141-152.675 | 1.00 | 0.00 | CARD |
| ATOM | 1445 | C5  | BGLC | 10 | -3.826 | 6.475-154.500 | 1.00 | 2.00 | CARD |
| ATOM | 1446 | H5  | BGLC | 10 | -3.100 | 7.307-154.390 | 1.00 | 0.00 | CARD |
| ATOM | 1447 | O5  | BGLC | 10 | -3.944 | 5.728-153.275 | 1.00 | 2.00 | CARD |
| ATOM | 1448 | C2  | BGLC | 10 | -2.069 | 4.292-153.754 | 1.00 | 2.00 | CARD |
| ATOM | 1449 | H2  | BGLC | 10 | -2.643 | 3.310-153.776 | 1.00 | 0.00 | CARD |
| ATOM | 1450 | O2  | BGLC | 10 | -0.774 | 4.005-153.221 | 1.00 | 2.00 | CARD |
| ATOM | 1451 | HO2 | BGLC | 10 | -0.508 | 3.090-153.208 | 1.00 | 0.00 | CARD |
| ATOM | 1452 | C3  | BGLC | 10 | -1.963 | 4.890-155.137 | 1.00 | 2.00 | CARD |
| ATOM | 1453 | H3  | BGLC | 10 | -1.239 | 5.703-155.092 | 1.00 | 0.00 | CARD |
| ATOM | 1454 | O3  | BGLC | 10 | -1.617 | 3.857-156.081 | 1.00 | 2.00 | CARD |
| ATOM | 1455 | HO3 | BGLC | 10 | -0.752 | 3.478-156.089 | 1.00 | 0.00 | CARD |
| ATOM | 1456 | C4  | BGLC | 10 | -3.247 | 5.585-155.555 | 1.00 | 2.00 | CARD |

|      |      |     |      |    |        |               |      |      |      |
|------|------|-----|------|----|--------|---------------|------|------|------|
| ATOM | 1457 | H4  | BGLC | 10 | -3.961 | 4.797-155.774 | 1.00 | 0.00 | CARD |
| ATOM | 1458 | O4  | BGLC | 10 | -3.184 | 6.239-156.784 | 1.00 | 2.00 | CARD |
| ATOM | 1459 | C6  | BGLC | 10 | -5.211 | 6.998-154.809 | 1.00 | 2.00 | CARD |
| ATOM | 1460 | H61 | BGLC | 10 | -5.733 | 6.092-155.279 | 1.00 | 0.00 | CARD |
| ATOM | 1461 | H62 | BGLC | 10 | -5.857 | 7.261-153.978 | 1.00 | 0.00 | CARD |
| ATOM | 1462 | O6  | BGLC | 10 | -5.156 | 7.945-155.861 | 1.00 | 2.00 | CARD |
| ATOM | 1463 | HO6 | BGLC | 10 | -4.572 | 8.692-155.776 | 1.00 | 0.00 | CARD |
| ATOM | 1464 | C1  | BGLC | 11 | -3.353 | 5.609-157.961 | 1.00 | 2.00 | CARD |
| ATOM | 1465 | H1  | BGLC | 11 | -4.023 | 4.763-157.862 | 1.00 | 0.00 | CARD |
| ATOM | 1466 | C5  | BGLC | 11 | -2.220 | 4.421-159.687 | 1.00 | 2.00 | CARD |
| ATOM | 1467 | H5  | BGLC | 11 | -2.946 | 3.590-159.574 | 1.00 | 0.00 | CARD |
| ATOM | 1468 | O5  | BGLC | 11 | -2.101 | 5.172-158.464 | 1.00 | 2.00 | CARD |
| ATOM | 1469 | C2  | BGLC | 11 | -3.977 | 6.606-158.947 | 1.00 | 2.00 | CARD |
| ATOM | 1470 | H2  | BGLC | 11 | -3.402 | 7.587-158.973 | 1.00 | 0.00 | CARD |
| ATOM | 1471 | O2  | BGLC | 11 | -5.271 | 6.896-158.414 | 1.00 | 2.00 | CARD |
| ATOM | 1472 | HO2 | BGLC | 11 | -5.537 | 7.811-158.405 | 1.00 | 0.00 | CARD |
| ATOM | 1473 | C3  | BGLC | 11 | -4.084 | 6.003-160.328 | 1.00 | 2.00 | CARD |
| ATOM | 1474 | H3  | BGLC | 11 | -4.807 | 5.190-160.280 | 1.00 | 0.00 | CARD |
| ATOM | 1475 | O3  | BGLC | 11 | -4.430 | 7.032-161.276 | 1.00 | 2.00 | CARD |
| ATOM | 1476 | HO3 | BGLC | 11 | -5.295 | 7.411-161.285 | 1.00 | 0.00 | CARD |
| ATOM | 1477 | C4  | BGLC | 11 | -2.799 | 5.307-160.744 | 1.00 | 2.00 | CARD |
| ATOM | 1478 | H4  | BGLC | 11 | -2.085 | 6.094-160.967 | 1.00 | 0.00 | CARD |
| ATOM | 1479 | O4  | BGLC | 11 | -2.863 | 4.648-161.971 | 1.00 | 2.00 | CARD |
| ATOM | 1480 | C6  | BGLC | 11 | -0.835 | 3.897-159.994 | 1.00 | 2.00 | CARD |
| ATOM | 1481 | H61 | BGLC | 11 | -0.312 | 4.801-160.468 | 1.00 | 0.00 | CARD |
| ATOM | 1482 | H62 | BGLC | 11 | -0.189 | 3.637-159.162 | 1.00 | 0.00 | CARD |
| ATOM | 1483 | O6  | BGLC | 11 | -0.891 | 2.946-161.043 | 1.00 | 2.00 | CARD |
| ATOM | 1484 | HO6 | BGLC | 11 | -1.475 | 2.199-160.955 | 1.00 | 0.00 | CARD |
| ATOM | 1485 | C1  | BGLC | 12 | -2.695 | 5.274-163.150 | 1.00 | 2.00 | CARD |
| ATOM | 1486 | H1  | BGLC | 12 | -2.027 | 6.122-163.054 | 1.00 | 0.00 | CARD |
| ATOM | 1487 | C5  | BGLC | 12 | -3.830 | 6.454-164.880 | 1.00 | 2.00 | CARD |
| ATOM | 1488 | H5  | BGLC | 12 | -3.104 | 7.285-164.769 | 1.00 | 0.00 | CARD |
| ATOM | 1489 | O5  | BGLC | 12 | -3.949 | 5.707-163.655 | 1.00 | 2.00 | CARD |
| ATOM | 1490 | C2  | BGLC | 12 | -2.074 | 4.272-164.134 | 1.00 | 2.00 | CARD |
| ATOM | 1491 | H2  | BGLC | 12 | -2.649 | 3.291-164.157 | 1.00 | 0.00 | CARD |
| ATOM | 1492 | O2  | BGLC | 12 | -0.779 | 3.985-163.601 | 1.00 | 2.00 | CARD |
| ATOM | 1493 | HO2 | BGLC | 12 | -0.513 | 3.070-163.588 | 1.00 | 0.00 | CARD |
| ATOM | 1494 | C3  | BGLC | 12 | -1.966 | 4.870-165.517 | 1.00 | 2.00 | CARD |
| ATOM | 1495 | H3  | BGLC | 12 | -1.243 | 5.684-165.473 | 1.00 | 0.00 | CARD |
| ATOM | 1496 | O3  | BGLC | 12 | -1.621 | 3.837-166.461 | 1.00 | 2.00 | CARD |
| ATOM | 1497 | HO3 | BGLC | 12 | -0.757 | 3.457-166.469 | 1.00 | 0.00 | CARD |
| ATOM | 1498 | C4  | BGLC | 12 | -3.252 | 5.564-165.935 | 1.00 | 2.00 | CARD |
| ATOM | 1499 | H4  | BGLC | 12 | -3.966 | 4.776-166.154 | 1.00 | 0.00 | CARD |
| ATOM | 1500 | O4  | BGLC | 12 | -3.189 | 6.218-167.164 | 1.00 | 2.00 | CARD |
| ATOM | 1501 | C6  | BGLC | 12 | -5.216 | 6.978-165.189 | 1.00 | 2.00 | CARD |
| ATOM | 1502 | H61 | BGLC | 12 | -5.739 | 6.073-165.660 | 1.00 | 0.00 | CARD |
| ATOM | 1503 | H62 | BGLC | 12 | -5.862 | 7.242-164.358 | 1.00 | 0.00 | CARD |
| ATOM | 1504 | O6  | BGLC | 12 | -5.160 | 7.925-166.241 | 1.00 | 2.00 | CARD |
| ATOM | 1505 | HO6 | BGLC | 12 | -4.576 | 8.672-166.156 | 1.00 | 0.00 | CARD |
| ATOM | 1506 | C1  | BGLC | 13 | -3.358 | 5.588-168.341 | 1.00 | 2.00 | CARD |
| ATOM | 1507 | H1  | BGLC | 13 | -4.028 | 4.742-168.242 | 1.00 | 0.00 | CARD |
| ATOM | 1508 | C5  | BGLC | 13 | -2.225 | 4.400-170.067 | 1.00 | 2.00 | CARD |
| ATOM | 1509 | H5  | BGLC | 13 | -2.951 | 3.569-169.952 | 1.00 | 0.00 | CARD |
| ATOM | 1510 | O5  | BGLC | 13 | -2.104 | 5.152-168.844 | 1.00 | 2.00 | CARD |

|      |      |     |      |    |        |               |      |      |      |
|------|------|-----|------|----|--------|---------------|------|------|------|
| ATOM | 1511 | C2  | BGLC | 13 | -3.980 | 6.585-169.327 | 1.00 | 2.00 | CARD |
| ATOM | 1512 | H2  | BGLC | 13 | -3.406 | 7.566-169.353 | 1.00 | 0.00 | CARD |
| ATOM | 1513 | O2  | BGLC | 13 | -5.276 | 6.874-168.794 | 1.00 | 2.00 | CARD |
| ATOM | 1514 | HO2 | BGLC | 13 | -5.542 | 7.789-168.784 | 1.00 | 0.00 | CARD |
| ATOM | 1515 | C3  | BGLC | 13 | -4.088 | 5.982-170.708 | 1.00 | 2.00 | CARD |
| ATOM | 1516 | H3  | BGLC | 13 | -4.812 | 5.169-170.660 | 1.00 | 0.00 | CARD |
| ATOM | 1517 | O3  | BGLC | 13 | -4.435 | 7.012-171.656 | 1.00 | 2.00 | CARD |
| ATOM | 1518 | HO3 | BGLC | 13 | -5.300 | 7.391-171.664 | 1.00 | 0.00 | CARD |
| ATOM | 1519 | C4  | BGLC | 13 | -2.804 | 5.286-171.124 | 1.00 | 2.00 | CARD |
| ATOM | 1520 | H4  | BGLC | 13 | -2.090 | 6.073-171.347 | 1.00 | 0.00 | CARD |
| ATOM | 1521 | O4  | BGLC | 13 | -2.868 | 4.627-172.351 | 1.00 | 2.00 | CARD |
| ATOM | 1522 | C6  | BGLC | 13 | -0.839 | 3.876-170.374 | 1.00 | 2.00 | CARD |
| ATOM | 1523 | H61 | BGLC | 13 | -0.316 | 4.779-170.849 | 1.00 | 0.00 | CARD |
| ATOM | 1524 | H62 | BGLC | 13 | -0.193 | 3.616-169.542 | 1.00 | 0.00 | CARD |
| ATOM | 1525 | O6  | BGLC | 13 | -0.896 | 2.924-171.423 | 1.00 | 2.00 | CARD |
| ATOM | 1526 | HO6 | BGLC | 13 | -1.480 | 2.178-171.334 | 1.00 | 0.00 | CARD |
| ATOM | 1527 | C1  | BGLC | 14 | -2.700 | 5.252-173.530 | 1.00 | 2.00 | CARD |
| ATOM | 1528 | H1  | BGLC | 14 | -2.030 | 6.099-173.435 | 1.00 | 0.00 | CARD |
| ATOM | 1529 | C5  | BGLC | 14 | -3.835 | 6.434-175.260 | 1.00 | 2.00 | CARD |
| ATOM | 1530 | H5  | BGLC | 14 | -3.110 | 7.266-175.150 | 1.00 | 0.00 | CARD |
| ATOM | 1531 | O5  | BGLC | 14 | -3.953 | 5.687-174.035 | 1.00 | 2.00 | CARD |
| ATOM | 1532 | C2  | BGLC | 14 | -2.077 | 4.251-174.514 | 1.00 | 2.00 | CARD |
| ATOM | 1533 | H2  | BGLC | 14 | -2.651 | 3.269-174.536 | 1.00 | 0.00 | CARD |
| ATOM | 1534 | O2  | BGLC | 14 | -0.782 | 3.964-173.981 | 1.00 | 2.00 | CARD |
| ATOM | 1535 | HO2 | BGLC | 14 | -0.515 | 3.049-173.969 | 1.00 | 0.00 | CARD |
| ATOM | 1536 | C3  | BGLC | 14 | -1.971 | 4.849-175.897 | 1.00 | 2.00 | CARD |
| ATOM | 1537 | H3  | BGLC | 14 | -1.247 | 5.662-175.853 | 1.00 | 0.00 | CARD |
| ATOM | 1538 | O3  | BGLC | 14 | -1.626 | 3.816-176.841 | 1.00 | 2.00 | CARD |
| ATOM | 1539 | HO3 | BGLC | 14 | -0.761 | 3.437-176.849 | 1.00 | 0.00 | CARD |
| ATOM | 1540 | C4  | BGLC | 14 | -3.256 | 5.544-176.315 | 1.00 | 2.00 | CARD |
| ATOM | 1541 | H4  | BGLC | 14 | -3.969 | 4.756-176.534 | 1.00 | 0.00 | CARD |
| ATOM | 1542 | O4  | BGLC | 14 | -3.193 | 6.197-177.544 | 1.00 | 2.00 | CARD |
| ATOM | 1543 | C6  | BGLC | 14 | -5.221 | 6.956-175.569 | 1.00 | 2.00 | CARD |
| ATOM | 1544 | H61 | BGLC | 14 | -5.743 | 6.050-176.041 | 1.00 | 0.00 | CARD |
| ATOM | 1545 | H62 | BGLC | 14 | -5.868 | 7.218-174.738 | 1.00 | 0.00 | CARD |
| ATOM | 1546 | O6  | BGLC | 14 | -5.165 | 7.904-176.621 | 1.00 | 2.00 | CARD |
| ATOM | 1547 | HO6 | BGLC | 14 | -4.581 | 8.651-176.535 | 1.00 | 0.00 | CARD |
| ATOM | 1548 | C1  | BGLC | 15 | -3.362 | 5.567-178.721 | 1.00 | 2.00 | CARD |
| ATOM | 1549 | H1  | BGLC | 15 | -4.032 | 4.721-178.622 | 1.00 | 0.00 | CARD |
| ATOM | 1550 | C5  | BGLC | 15 | -2.228 | 4.379-180.447 | 1.00 | 2.00 | CARD |
| ATOM | 1551 | H5  | BGLC | 15 | -2.954 | 3.548-180.333 | 1.00 | 0.00 | CARD |
| ATOM | 1552 | O5  | BGLC | 15 | -2.109 | 5.131-179.224 | 1.00 | 2.00 | CARD |
| ATOM | 1553 | C2  | BGLC | 15 | -3.985 | 6.565-179.707 | 1.00 | 2.00 | CARD |
| ATOM | 1554 | H2  | BGLC | 15 | -3.411 | 7.547-179.734 | 1.00 | 0.00 | CARD |
| ATOM | 1555 | O2  | BGLC | 15 | -5.280 | 6.853-179.174 | 1.00 | 2.00 | CARD |
| ATOM | 1556 | HO2 | BGLC | 15 | -5.547 | 7.768-179.164 | 1.00 | 0.00 | CARD |
| ATOM | 1557 | C3  | BGLC | 15 | -4.093 | 5.961-181.088 | 1.00 | 2.00 | CARD |
| ATOM | 1558 | H3  | BGLC | 15 | -4.816 | 5.148-181.040 | 1.00 | 0.00 | CARD |
| ATOM | 1559 | O3  | BGLC | 15 | -4.439 | 6.990-182.036 | 1.00 | 2.00 | CARD |
| ATOM | 1560 | HO3 | BGLC | 15 | -5.303 | 7.369-182.045 | 1.00 | 0.00 | CARD |
| ATOM | 1561 | C4  | BGLC | 15 | -2.809 | 5.265-181.504 | 1.00 | 2.00 | CARD |
| ATOM | 1562 | H4  | BGLC | 15 | -2.096 | 6.053-181.727 | 1.00 | 0.00 | CARD |
| ATOM | 1563 | O4  | BGLC | 15 | -2.873 | 4.607-182.731 | 1.00 | 2.00 | CARD |
| ATOM | 1564 | C6  | BGLC | 15 | -0.843 | 3.855-180.754 | 1.00 | 2.00 | CARD |

|      |      |     |      |    |        |               |      |      |      |
|------|------|-----|------|----|--------|---------------|------|------|------|
| ATOM | 1565 | H61 | BGLC | 15 | -0.321 | 4.759-181.229 | 1.00 | 0.00 | CARD |
| ATOM | 1566 | H62 | BGLC | 15 | -0.196 | 3.596-179.922 | 1.00 | 0.00 | CARD |
| ATOM | 1567 | O6  | BGLC | 15 | -0.899 | 2.903-181.802 | 1.00 | 2.00 | CARD |
| ATOM | 1568 | HO6 | BGLC | 15 | -1.483 | 2.156-181.713 | 1.00 | 0.00 | CARD |
| ATOM | 1569 | C1  | BGLC | 16 | -2.705 | 5.232-183.910 | 1.00 | 2.00 | CARD |
| ATOM | 1570 | H1  | BGLC | 16 | -2.035 | 6.079-183.815 | 1.00 | 0.00 | CARD |
| ATOM | 1571 | C5  | BGLC | 16 | -3.839 | 6.413-185.640 | 1.00 | 2.00 | CARD |
| ATOM | 1572 | H5  | BGLC | 16 | -3.113 | 7.245-185.530 | 1.00 | 0.00 | CARD |
| ATOM | 1573 | O5  | BGLC | 16 | -3.958 | 5.667-184.415 | 1.00 | 2.00 | CARD |
| ATOM | 1574 | C2  | BGLC | 16 | -2.082 | 4.231-184.894 | 1.00 | 2.00 | CARD |
| ATOM | 1575 | H2  | BGLC | 16 | -2.656 | 3.249-184.915 | 1.00 | 0.00 | CARD |
| ATOM | 1576 | O2  | BGLC | 16 | -0.786 | 3.944-184.361 | 1.00 | 2.00 | CARD |
| ATOM | 1577 | HO2 | BGLC | 16 | -0.519 | 3.029-184.349 | 1.00 | 0.00 | CARD |
| ATOM | 1578 | C3  | BGLC | 16 | -1.976 | 4.828-186.277 | 1.00 | 2.00 | CARD |
| ATOM | 1579 | H3  | BGLC | 16 | -1.252 | 5.641-186.232 | 1.00 | 0.00 | CARD |
| ATOM | 1580 | O3  | BGLC | 16 | -1.631 | 3.795-187.221 | 1.00 | 2.00 | CARD |
| ATOM | 1581 | HO3 | BGLC | 16 | -0.766 | 3.416-187.229 | 1.00 | 0.00 | CARD |
| ATOM | 1582 | C4  | BGLC | 16 | -3.260 | 5.523-186.695 | 1.00 | 2.00 | CARD |
| ATOM | 1583 | H4  | BGLC | 16 | -3.973 | 4.734-186.914 | 1.00 | 0.00 | CARD |
| ATOM | 1584 | O4  | BGLC | 16 | -3.198 | 6.176-187.924 | 1.00 | 2.00 | CARD |
| ATOM | 1585 | C6  | BGLC | 16 | -5.224 | 6.935-185.949 | 1.00 | 2.00 | CARD |
| ATOM | 1586 | H61 | BGLC | 16 | -5.745 | 6.029-186.420 | 1.00 | 0.00 | CARD |
| ATOM | 1587 | H62 | BGLC | 16 | -5.871 | 7.197-185.118 | 1.00 | 0.00 | CARD |
| ATOM | 1588 | O6  | BGLC | 16 | -5.170 | 7.884-187.001 | 1.00 | 2.00 | CARD |
| ATOM | 1589 | HO6 | BGLC | 16 | -4.587 | 8.632-186.915 | 1.00 | 0.00 | CARD |
| ATOM | 1590 | C1  | BGLC | 17 | -3.367 | 5.546-189.101 | 1.00 | 2.00 | CARD |
| ATOM | 1591 | H1  | BGLC | 17 | -4.037 | 4.700-189.002 | 1.00 | 0.00 | CARD |
| ATOM | 1592 | C5  | BGLC | 17 | -2.233 | 4.359-190.827 | 1.00 | 2.00 | CARD |
| ATOM | 1593 | H5  | BGLC | 17 | -2.959 | 3.528-190.714 | 1.00 | 0.00 | CARD |
| ATOM | 1594 | O5  | BGLC | 17 | -2.114 | 5.110-189.604 | 1.00 | 2.00 | CARD |
| ATOM | 1595 | C2  | BGLC | 17 | -3.989 | 6.544-190.087 | 1.00 | 2.00 | CARD |
| ATOM | 1596 | H2  | BGLC | 17 | -3.415 | 7.526-190.114 | 1.00 | 0.00 | CARD |
| ATOM | 1597 | O2  | BGLC | 17 | -5.284 | 6.832-189.554 | 1.00 | 2.00 | CARD |
| ATOM | 1598 | HO2 | BGLC | 17 | -5.551 | 7.747-189.543 | 1.00 | 0.00 | CARD |
| ATOM | 1599 | C3  | BGLC | 17 | -4.098 | 5.940-191.468 | 1.00 | 2.00 | CARD |
| ATOM | 1600 | H3  | BGLC | 17 | -4.821 | 5.127-191.420 | 1.00 | 0.00 | CARD |
| ATOM | 1601 | O3  | BGLC | 17 | -4.443 | 6.969-192.416 | 1.00 | 2.00 | CARD |
| ATOM | 1602 | HO3 | BGLC | 17 | -5.307 | 7.349-192.425 | 1.00 | 0.00 | CARD |
| ATOM | 1603 | C4  | BGLC | 17 | -2.813 | 5.244-191.884 | 1.00 | 2.00 | CARD |
| ATOM | 1604 | H4  | BGLC | 17 | -2.100 | 6.031-192.108 | 1.00 | 0.00 | CARD |
| ATOM | 1605 | O4  | BGLC | 17 | -2.878 | 4.586-193.111 | 1.00 | 2.00 | CARD |
| ATOM | 1606 | C6  | BGLC | 17 | -0.848 | 3.835-191.134 | 1.00 | 2.00 | CARD |
| ATOM | 1607 | H61 | BGLC | 17 | -0.326 | 4.739-191.609 | 1.00 | 0.00 | CARD |
| ATOM | 1608 | H62 | BGLC | 17 | -0.201 | 3.576-190.302 | 1.00 | 0.00 | CARD |
| ATOM | 1609 | O6  | BGLC | 17 | -0.904 | 2.883-192.182 | 1.00 | 2.00 | CARD |
| ATOM | 1610 | HO6 | BGLC | 17 | -1.488 | 2.136-192.093 | 1.00 | 0.00 | CARD |
| ATOM | 1611 | C1  | BGLC | 18 | -2.710 | 5.211-194.290 | 1.00 | 2.00 | CARD |
| ATOM | 1612 | H1  | BGLC | 18 | -2.041 | 6.058-194.195 | 1.00 | 0.00 | CARD |
| ATOM | 1613 | C5  | BGLC | 18 | -3.843 | 6.392-196.020 | 1.00 | 2.00 | CARD |
| ATOM | 1614 | H5  | BGLC | 18 | -3.117 | 7.223-195.909 | 1.00 | 0.00 | CARD |
| ATOM | 1615 | O5  | BGLC | 18 | -3.962 | 5.645-194.795 | 1.00 | 2.00 | CARD |
| ATOM | 1616 | C2  | BGLC | 18 | -2.087 | 4.211-195.274 | 1.00 | 2.00 | CARD |
| ATOM | 1617 | H2  | BGLC | 18 | -2.663 | 3.230-195.295 | 1.00 | 0.00 | CARD |
| ATOM | 1618 | O2  | BGLC | 18 | -0.791 | 3.923-194.741 | 1.00 | 2.00 | CARD |

|      |      |     |      |    |        |               |      |      |      |
|------|------|-----|------|----|--------|---------------|------|------|------|
| ATOM | 1619 | HO2 | BGLC | 18 | -0.525 | 3.008-194.729 | 1.00 | 0.00 | CARD |
| ATOM | 1620 | C3  | BGLC | 18 | -1.980 | 4.807-196.657 | 1.00 | 2.00 | CARD |
| ATOM | 1621 | H3  | BGLC | 18 | -1.256 | 5.620-196.612 | 1.00 | 0.00 | CARD |
| ATOM | 1622 | O3  | BGLC | 18 | -1.634 | 3.774-197.601 | 1.00 | 2.00 | CARD |
| ATOM | 1623 | HO3 | BGLC | 18 | -0.769 | 3.395-197.609 | 1.00 | 0.00 | CARD |
| ATOM | 1624 | C4  | BGLC | 18 | -3.265 | 5.503-197.075 | 1.00 | 2.00 | CARD |
| ATOM | 1625 | H4  | BGLC | 18 | -3.979 | 4.715-197.294 | 1.00 | 0.00 | CARD |
| ATOM | 1626 | O4  | BGLC | 18 | -3.202 | 6.156-198.304 | 1.00 | 2.00 | CARD |
| ATOM | 1627 | C6  | BGLC | 18 | -5.229 | 6.915-196.329 | 1.00 | 2.00 | CARD |
| ATOM | 1628 | H61 | BGLC | 18 | -5.752 | 6.009-196.800 | 1.00 | 0.00 | CARD |
| ATOM | 1629 | H62 | BGLC | 18 | -5.875 | 7.178-195.498 | 1.00 | 0.00 | CARD |
| ATOM | 1630 | O6  | BGLC | 18 | -5.173 | 7.862-197.381 | 1.00 | 2.00 | CARD |
| ATOM | 1631 | HO6 | BGLC | 18 | -4.589 | 8.609-197.295 | 1.00 | 0.00 | CARD |
| ATOM | 1632 | C1  | BGLC | 19 | -3.371 | 5.525-199.481 | 1.00 | 2.00 | CARD |
| ATOM | 1633 | H1  | BGLC | 19 | -4.040 | 4.678-199.382 | 1.00 | 0.00 | CARD |
| ATOM | 1634 | C5  | BGLC | 19 | -2.237 | 4.337-201.207 | 1.00 | 2.00 | CARD |
| ATOM | 1635 | H5  | BGLC | 19 | -2.962 | 3.506-201.093 | 1.00 | 0.00 | CARD |
| ATOM | 1636 | O5  | BGLC | 19 | -2.118 | 5.090-199.984 | 1.00 | 2.00 | CARD |
| ATOM | 1637 | C2  | BGLC | 19 | -3.994 | 6.522-200.467 | 1.00 | 2.00 | CARD |
| ATOM | 1638 | H2  | BGLC | 19 | -3.418 | 7.503-200.492 | 1.00 | 0.00 | CARD |
| ATOM | 1639 | O2  | BGLC | 19 | -5.288 | 6.812-199.934 | 1.00 | 2.00 | CARD |
| ATOM | 1640 | HO2 | BGLC | 19 | -5.554 | 7.727-199.925 | 1.00 | 0.00 | CARD |
| ATOM | 1641 | C3  | BGLC | 19 | -4.102 | 5.921-201.848 | 1.00 | 2.00 | CARD |
| ATOM | 1642 | H3  | BGLC | 19 | -4.826 | 5.109-201.798 | 1.00 | 0.00 | CARD |
| ATOM | 1643 | O3  | BGLC | 19 | -4.448 | 6.949-202.796 | 1.00 | 2.00 | CARD |
| ATOM | 1644 | HO3 | BGLC | 19 | -5.313 | 7.328-202.805 | 1.00 | 0.00 | CARD |
| ATOM | 1645 | C4  | BGLC | 19 | -2.818 | 5.223-202.264 | 1.00 | 2.00 | CARD |
| ATOM | 1646 | H4  | BGLC | 19 | -2.106 | 6.011-202.487 | 1.00 | 0.00 | CARD |
| ATOM | 1647 | O4  | BGLC | 19 | -2.881 | 4.564-203.491 | 1.00 | 2.00 | CARD |
| ATOM | 1648 | C6  | BGLC | 19 | -0.853 | 3.814-201.514 | 1.00 | 2.00 | CARD |
| ATOM | 1649 | H61 | BGLC | 19 | -0.331 | 4.718-201.989 | 1.00 | 0.00 | CARD |
| ATOM | 1650 | H62 | BGLC | 19 | -0.206 | 3.555-200.682 | 1.00 | 0.00 | CARD |
| ATOM | 1651 | O6  | BGLC | 19 | -0.909 | 2.862-202.562 | 1.00 | 2.00 | CARD |
| ATOM | 1652 | HO6 | BGLC | 19 | -1.493 | 2.115-202.473 | 1.00 | 0.00 | CARD |
| ATOM | 1653 | C1  | BGLC | 20 | -2.713 | 5.191-204.670 | 1.00 | 2.00 | CARD |
| ATOM | 1654 | H1  | BGLC | 20 | -2.045 | 6.039-204.574 | 1.00 | 0.00 | CARD |
| ATOM | 1655 | C5  | BGLC | 20 | -3.848 | 6.371-206.400 | 1.00 | 2.00 | CARD |
| ATOM | 1656 | H5  | BGLC | 20 | -3.122 | 7.202-206.289 | 1.00 | 0.00 | CARD |
| ATOM | 1657 | O5  | BGLC | 20 | -3.967 | 5.624-205.175 | 1.00 | 2.00 | CARD |
| ATOM | 1658 | C2  | BGLC | 20 | -2.092 | 4.189-205.654 | 1.00 | 2.00 | CARD |
| ATOM | 1659 | H2  | BGLC | 20 | -2.667 | 3.208-205.676 | 1.00 | 0.00 | CARD |
| ATOM | 1660 | O2  | BGLC | 20 | -0.795 | 3.901-205.121 | 1.00 | 2.00 | CARD |
| ATOM | 1661 | HO2 | BGLC | 20 | -0.529 | 2.986-205.108 | 1.00 | 0.00 | CARD |
| ATOM | 1662 | C3  | BGLC | 20 | -1.985 | 4.786-207.037 | 1.00 | 2.00 | CARD |
| ATOM | 1663 | H3  | BGLC | 20 | -1.261 | 5.599-206.992 | 1.00 | 0.00 | CARD |
| ATOM | 1664 | O3  | BGLC | 20 | -1.639 | 3.753-207.981 | 1.00 | 2.00 | CARD |
| ATOM | 1665 | HO3 | BGLC | 20 | -0.774 | 3.374-207.989 | 1.00 | 0.00 | CARD |
| ATOM | 1666 | C4  | BGLC | 20 | -3.270 | 5.481-207.455 | 1.00 | 2.00 | CARD |
| ATOM | 1667 | H4  | BGLC | 20 | -4.021 | 4.753-207.745 | 1.00 | 0.00 | CARD |
| ATOM | 1668 | O4  | BGLC | 20 | -3.099 | 6.226-208.675 | 1.00 | 2.00 | CARD |
| ATOM | 1669 | HO4 | BGLC | 20 | -2.636 | 5.659-209.343 | 1.00 | 0.00 | CARD |
| ATOM | 1670 | C6  | BGLC | 20 | -5.233 | 6.895-206.709 | 1.00 | 2.00 | CARD |
| ATOM | 1671 | H61 | BGLC | 20 | -5.756 | 5.989-207.179 | 1.00 | 0.00 | CARD |
| ATOM | 1672 | H62 | BGLC | 20 | -5.879 | 7.159-205.878 | 1.00 | 0.00 | CARD |

|      |      |     |      |    |        |                |      |      |      |
|------|------|-----|------|----|--------|----------------|------|------|------|
| ATOM | 1673 | O6  | BGLC | 20 | -5.178 | 7.841-207.761  | 1.00 | 2.00 | CARD |
| ATOM | 1674 | HO6 | BGLC | 20 | -4.594 | 8.588-207.676  | 1.00 | 0.00 | CARD |
| ATOM | 1675 | C1  | BGLC | 1  | 2.666  | 0.117-106.052  | 1.00 | 2.00 | CARE |
| ATOM | 1676 | H1  | BGLC | 1  | 1.907  | -0.645-105.919 | 1.00 | 0.00 | CARE |
| ATOM | 1677 | O1  | BGLC | 1  | 2.943  | 0.837-104.867  | 1.00 | 2.00 | CARE |
| ATOM | 1678 | HO1 | BGLC | 1  | 3.330  | 1.643-105.132  | 1.00 | 0.00 | CARE |
| ATOM | 1679 | C5  | BGLC | 1  | 3.799  | -1.071-107.778 | 1.00 | 2.00 | CARE |
| ATOM | 1680 | H5  | BGLC | 1  | 3.073  | -1.902-107.664 | 1.00 | 0.00 | CARE |
| ATOM | 1681 | O5  | BGLC | 1  | 3.919  | -0.320-106.556 | 1.00 | 2.00 | CARE |
| ATOM | 1682 | C2  | BGLC | 1  | 2.044  | 1.114-107.039  | 1.00 | 2.00 | CARE |
| ATOM | 1683 | H2  | BGLC | 1  | 2.619  | 2.095-107.066  | 1.00 | 0.00 | CARE |
| ATOM | 1684 | O2  | BGLC | 1  | 0.748  | 1.404-106.506  | 1.00 | 2.00 | CARE |
| ATOM | 1685 | HO2 | BGLC | 1  | 0.482  | 2.319-106.497  | 1.00 | 0.00 | CARE |
| ATOM | 1686 | C3  | BGLC | 1  | 1.935  | 0.511-108.420  | 1.00 | 2.00 | CARE |
| ATOM | 1687 | H3  | BGLC | 1  | 1.211  | -0.302-108.372 | 1.00 | 0.00 | CARE |
| ATOM | 1688 | O3  | BGLC | 1  | 1.590  | 1.540-109.368  | 1.00 | 2.00 | CARE |
| ATOM | 1689 | HO3 | BGLC | 1  | 0.726  | 1.920-109.377  | 1.00 | 0.00 | CARE |
| ATOM | 1690 | C4  | BGLC | 1  | 3.219  | -0.186-108.836 | 1.00 | 2.00 | CARE |
| ATOM | 1691 | H4  | BGLC | 1  | 3.932  | 0.602-109.059  | 1.00 | 0.00 | CARE |
| ATOM | 1692 | O4  | BGLC | 1  | 3.156  | -0.844-110.063 | 1.00 | 2.00 | CARE |
| ATOM | 1693 | C6  | BGLC | 1  | 5.185  | -1.595-108.086 | 1.00 | 2.00 | CARE |
| ATOM | 1694 | H61 | BGLC | 1  | 5.706  | -0.691-108.562 | 1.00 | 0.00 | CARE |
| ATOM | 1695 | H62 | BGLC | 1  | 5.832  | -1.854-107.254 | 1.00 | 0.00 | CARE |
| ATOM | 1696 | O6  | BGLC | 1  | 5.129  | -2.548-109.134 | 1.00 | 2.00 | CARE |
| ATOM | 1697 | HO6 | BGLC | 1  | 4.546  | -3.295-109.044 | 1.00 | 0.00 | CARE |
| ATOM | 1698 | C1  | BGLC | 2  | 3.325  | -0.218-111.242 | 1.00 | 2.00 | CARE |
| ATOM | 1699 | H1  | BGLC | 2  | 3.994  | 0.629-111.146  | 1.00 | 0.00 | CARE |
| ATOM | 1700 | C5  | BGLC | 2  | 2.190  | 0.962-112.972  | 1.00 | 2.00 | CARE |
| ATOM | 1701 | H5  | BGLC | 2  | 2.917  | 1.793-112.862  | 1.00 | 0.00 | CARE |
| ATOM | 1702 | O5  | BGLC | 2  | 2.071  | 0.216-111.746  | 1.00 | 2.00 | CARE |
| ATOM | 1703 | C2  | BGLC | 2  | 3.946  | -1.220-112.225 | 1.00 | 2.00 | CARE |
| ATOM | 1704 | H2  | BGLC | 2  | 3.372  | -2.202-112.247 | 1.00 | 0.00 | CARE |
| ATOM | 1705 | O2  | BGLC | 2  | 5.240  | -1.507-111.692 | 1.00 | 2.00 | CARE |
| ATOM | 1706 | HO2 | BGLC | 2  | 5.506  | -2.422-111.678 | 1.00 | 0.00 | CARE |
| ATOM | 1707 | C3  | BGLC | 2  | 4.053  | -0.622-113.608 | 1.00 | 2.00 | CARE |
| ATOM | 1708 | H3  | BGLC | 2  | 4.777  | 0.191-113.564  | 1.00 | 0.00 | CARE |
| ATOM | 1709 | O3  | BGLC | 2  | 4.397  | -1.655-114.552 | 1.00 | 2.00 | CARE |
| ATOM | 1710 | HO3 | BGLC | 2  | 5.261  | -2.035-114.560 | 1.00 | 0.00 | CARE |
| ATOM | 1711 | C4  | BGLC | 2  | 2.768  | 0.074-114.026  | 1.00 | 2.00 | CARE |
| ATOM | 1712 | H4  | BGLC | 2  | 2.055  | -0.714-114.245 | 1.00 | 0.00 | CARE |
| ATOM | 1713 | O4  | BGLC | 2  | 2.831  | 0.727-115.256  | 1.00 | 2.00 | CARE |
| ATOM | 1714 | C6  | BGLC | 2  | 0.805  | 1.485-113.280  | 1.00 | 2.00 | CARE |
| ATOM | 1715 | H61 | BGLC | 2  | 0.282  | 0.579-113.750  | 1.00 | 0.00 | CARE |
| ATOM | 1716 | H62 | BGLC | 2  | 0.159  | 1.748-112.448  | 1.00 | 0.00 | CARE |
| ATOM | 1717 | O6  | BGLC | 2  | 0.860  | 2.432-114.332  | 1.00 | 2.00 | CARE |
| ATOM | 1718 | HO6 | BGLC | 2  | 1.444  | 3.179-114.247  | 1.00 | 0.00 | CARE |
| ATOM | 1719 | C1  | BGLC | 3  | 2.661  | 0.095-116.432  | 1.00 | 2.00 | CARE |
| ATOM | 1720 | H1  | BGLC | 3  | 1.993  | -0.753-116.331 | 1.00 | 0.00 | CARE |
| ATOM | 1721 | C5  | BGLC | 3  | 3.795  | -1.091-118.158 | 1.00 | 2.00 | CARE |
| ATOM | 1722 | H5  | BGLC | 3  | 3.069  | -1.922-118.043 | 1.00 | 0.00 | CARE |
| ATOM | 1723 | O5  | BGLC | 3  | 3.915  | -0.339-116.936 | 1.00 | 2.00 | CARE |
| ATOM | 1724 | C2  | BGLC | 3  | 2.039  | 1.094-117.419  | 1.00 | 2.00 | CARE |
| ATOM | 1725 | H2  | BGLC | 3  | 2.614  | 2.075-117.446  | 1.00 | 0.00 | CARE |
| ATOM | 1726 | O2  | BGLC | 3  | 0.744  | 1.383-116.886  | 1.00 | 2.00 | CARE |



|      |      |     |      |   |       |                |      |      |      |
|------|------|-----|------|---|-------|----------------|------|------|------|
| ATOM | 1727 | HO2 | BGLC | 3 | 0.478 | 2.298-116.876  | 1.00 | 0.00 | CARE |
| ATOM | 1728 | C3  | BGLC | 3 | 1.930 | 0.491-118.800  | 1.00 | 2.00 | CARE |
| ATOM | 1729 | H3  | BGLC | 3 | 1.206 | -0.322-118.752 | 1.00 | 0.00 | CARE |
| ATOM | 1730 | O3  | BGLC | 3 | 1.585 | 1.520-119.748  | 1.00 | 2.00 | CARE |
| ATOM | 1731 | HO3 | BGLC | 3 | 0.721 | 1.900-119.757  | 1.00 | 0.00 | CARE |
| ATOM | 1732 | C4  | BGLC | 3 | 3.215 | -0.206-119.216 | 1.00 | 2.00 | CARE |
| ATOM | 1733 | H4  | BGLC | 3 | 3.928 | 0.582-119.439  | 1.00 | 0.00 | CARE |
| ATOM | 1734 | O4  | BGLC | 3 | 3.151 | -0.864-120.443 | 1.00 | 2.00 | CARE |
| ATOM | 1735 | C6  | BGLC | 3 | 5.180 | -1.615-118.466 | 1.00 | 2.00 | CARE |
| ATOM | 1736 | H61 | BGLC | 3 | 5.701 | -0.711-118.942 | 1.00 | 0.00 | CARE |
| ATOM | 1737 | H62 | BGLC | 3 | 5.827 | -1.874-117.634 | 1.00 | 0.00 | CARE |
| ATOM | 1738 | O6  | BGLC | 3 | 5.124 | -2.568-119.514 | 1.00 | 2.00 | CARE |
| ATOM | 1739 | HO6 | BGLC | 3 | 4.541 | -3.315-119.424 | 1.00 | 0.00 | CARE |
| ATOM | 1740 | C1  | BGLC | 4 | 3.320 | -0.238-121.622 | 1.00 | 2.00 | CARE |
| ATOM | 1741 | H1  | BGLC | 4 | 3.989 | 0.609-121.526  | 1.00 | 0.00 | CARE |
| ATOM | 1742 | C5  | BGLC | 4 | 2.185 | 0.942-123.352  | 1.00 | 2.00 | CARE |
| ATOM | 1743 | H5  | BGLC | 4 | 2.911 | 1.773-123.242  | 1.00 | 0.00 | CARE |
| ATOM | 1744 | O5  | BGLC | 4 | 2.066 | 0.195-122.126  | 1.00 | 2.00 | CARE |
| ATOM | 1745 | C2  | BGLC | 4 | 3.941 | -1.240-122.605 | 1.00 | 2.00 | CARE |
| ATOM | 1746 | H2  | BGLC | 4 | 3.366 | -2.221-122.627 | 1.00 | 0.00 | CARE |
| ATOM | 1747 | O2  | BGLC | 4 | 5.237 | -1.527-122.072 | 1.00 | 2.00 | CARE |
| ATOM | 1748 | HO2 | BGLC | 4 | 5.503 | -2.442-122.058 | 1.00 | 0.00 | CARE |
| ATOM | 1749 | C3  | BGLC | 4 | 4.049 | -0.643-123.988 | 1.00 | 2.00 | CARE |
| ATOM | 1750 | H3  | BGLC | 4 | 4.773 | 0.170-123.945  | 1.00 | 0.00 | CARE |
| ATOM | 1751 | O3  | BGLC | 4 | 4.393 | -1.677-124.932 | 1.00 | 2.00 | CARE |
| ATOM | 1752 | HO3 | BGLC | 4 | 5.257 | -2.058-124.940 | 1.00 | 0.00 | CARE |
| ATOM | 1753 | C4  | BGLC | 4 | 2.764 | 0.052-124.406  | 1.00 | 2.00 | CARE |
| ATOM | 1754 | H4  | BGLC | 4 | 2.051 | -0.737-124.625 | 1.00 | 0.00 | CARE |
| ATOM | 1755 | O4  | BGLC | 4 | 2.827 | 0.706-125.636  | 1.00 | 2.00 | CARE |
| ATOM | 1756 | C6  | BGLC | 4 | 0.800 | 1.464-123.660  | 1.00 | 2.00 | CARE |
| ATOM | 1757 | H61 | BGLC | 4 | 0.278 | 0.558-124.131  | 1.00 | 0.00 | CARE |
| ATOM | 1758 | H62 | BGLC | 4 | 0.154 | 1.726-122.828  | 1.00 | 0.00 | CARE |
| ATOM | 1759 | O6  | BGLC | 4 | 0.855 | 2.412-124.712  | 1.00 | 2.00 | CARE |
| ATOM | 1760 | HO6 | BGLC | 4 | 1.439 | 3.159-124.626  | 1.00 | 0.00 | CARE |
| ATOM | 1761 | C1  | BGLC | 5 | 2.657 | 0.075-126.812  | 1.00 | 2.00 | CARE |
| ATOM | 1762 | H1  | BGLC | 5 | 1.988 | -0.772-126.712 | 1.00 | 0.00 | CARE |
| ATOM | 1763 | C5  | BGLC | 5 | 3.791 | -1.112-128.538 | 1.00 | 2.00 | CARE |
| ATOM | 1764 | H5  | BGLC | 5 | 3.065 | -1.943-128.425 | 1.00 | 0.00 | CARE |
| ATOM | 1765 | O5  | BGLC | 5 | 3.910 | -0.361-127.316 | 1.00 | 2.00 | CARE |
| ATOM | 1766 | C2  | BGLC | 5 | 2.034 | 1.073-127.799  | 1.00 | 2.00 | CARE |
| ATOM | 1767 | H2  | BGLC | 5 | 2.609 | 2.054-127.825  | 1.00 | 0.00 | CARE |
| ATOM | 1768 | O2  | BGLC | 5 | 0.739 | 1.363-127.266  | 1.00 | 2.00 | CARE |
| ATOM | 1769 | HO2 | BGLC | 5 | 0.473 | 2.278-127.257  | 1.00 | 0.00 | CARE |
| ATOM | 1770 | C3  | BGLC | 5 | 1.926 | 0.470-129.180  | 1.00 | 2.00 | CARE |
| ATOM | 1771 | H3  | BGLC | 5 | 1.202 | -0.343-129.132 | 1.00 | 0.00 | CARE |
| ATOM | 1772 | O3  | BGLC | 5 | 1.580 | 1.500-130.128  | 1.00 | 2.00 | CARE |
| ATOM | 1773 | HO3 | BGLC | 5 | 0.716 | 1.880-130.137  | 1.00 | 0.00 | CARE |
| ATOM | 1774 | C4  | BGLC | 5 | 3.211 | -0.227-129.596 | 1.00 | 2.00 | CARE |
| ATOM | 1775 | H4  | BGLC | 5 | 3.924 | 0.561-129.819  | 1.00 | 0.00 | CARE |
| ATOM | 1776 | O4  | BGLC | 5 | 3.147 | -0.886-130.823 | 1.00 | 2.00 | CARE |
| ATOM | 1777 | C6  | BGLC | 5 | 5.175 | -1.637-128.846 | 1.00 | 2.00 | CARE |
| ATOM | 1778 | H61 | BGLC | 5 | 5.697 | -0.733-129.320 | 1.00 | 0.00 | CARE |
| ATOM | 1779 | H62 | BGLC | 5 | 5.822 | -1.898-128.014 | 1.00 | 0.00 | CARE |
| ATOM | 1780 | O6  | BGLC | 5 | 5.119 | -2.588-129.894 | 1.00 | 2.00 | CARE |

|      |      |     |      |   |       |        |          |      |      |      |
|------|------|-----|------|---|-------|--------|----------|------|------|------|
| ATOM | 1781 | HO6 | BGLC | 5 | 4.535 | -3.335 | -129.806 | 1.00 | 0.00 | CARE |
| ATOM | 1782 | C1  | BGLC | 6 | 3.316 | -0.260 | -132.002 | 1.00 | 2.00 | CARE |
| ATOM | 1783 | H1  | BGLC | 6 | 3.986 | 0.586  | -131.906 | 1.00 | 0.00 | CARE |
| ATOM | 1784 | C5  | BGLC | 6 | 2.180 | 0.921  | -133.732 | 1.00 | 2.00 | CARE |
| ATOM | 1785 | H5  | BGLC | 6 | 2.907 | 1.752  | -133.622 | 1.00 | 0.00 | CARE |
| ATOM | 1786 | O5  | BGLC | 6 | 2.061 | 0.175  | -132.506 | 1.00 | 2.00 | CARE |
| ATOM | 1787 | C2  | BGLC | 6 | 3.936 | -1.262 | -132.985 | 1.00 | 2.00 | CARE |
| ATOM | 1788 | H2  | BGLC | 6 | 3.362 | -2.244 | -133.009 | 1.00 | 0.00 | CARE |
| ATOM | 1789 | O2  | BGLC | 6 | 5.232 | -1.548 | -132.452 | 1.00 | 2.00 | CARE |
| ATOM | 1790 | HO2 | BGLC | 6 | 5.499 | -2.463 | -132.438 | 1.00 | 0.00 | CARE |
| ATOM | 1791 | C3  | BGLC | 6 | 4.045 | -0.663 | -134.368 | 1.00 | 2.00 | CARE |
| ATOM | 1792 | H3  | BGLC | 6 | 4.768 | 0.151  | -134.325 | 1.00 | 0.00 | CARE |
| ATOM | 1793 | O3  | BGLC | 6 | 4.389 | -1.696 | -135.312 | 1.00 | 2.00 | CARE |
| ATOM | 1794 | HO3 | BGLC | 6 | 5.253 | -2.077 | -135.319 | 1.00 | 0.00 | CARE |
| ATOM | 1795 | C4  | BGLC | 6 | 2.759 | 0.031  | -134.786 | 1.00 | 2.00 | CARE |
| ATOM | 1796 | H4  | BGLC | 6 | 2.046 | -0.758 | -135.005 | 1.00 | 0.00 | CARE |
| ATOM | 1797 | O4  | BGLC | 6 | 2.822 | 0.685  | -136.016 | 1.00 | 2.00 | CARE |
| ATOM | 1798 | C6  | BGLC | 6 | 0.795 | 1.444  | -134.040 | 1.00 | 2.00 | CARE |
| ATOM | 1799 | H61 | BGLC | 6 | 0.272 | 0.538  | -134.510 | 1.00 | 0.00 | CARE |
| ATOM | 1800 | H62 | BGLC | 6 | 0.149 | 1.707  | -133.208 | 1.00 | 0.00 | CARE |
| ATOM | 1801 | O6  | BGLC | 6 | 0.850 | 2.391  | -135.092 | 1.00 | 2.00 | CARE |
| ATOM | 1802 | HO6 | BGLC | 6 | 1.434 | 3.138  | -135.007 | 1.00 | 0.00 | CARE |
| ATOM | 1803 | C1  | BGLC | 7 | 2.652 | 0.054  | -137.192 | 1.00 | 2.00 | CARE |
| ATOM | 1804 | H1  | BGLC | 7 | 1.983 | -0.793 | -137.092 | 1.00 | 0.00 | CARE |
| ATOM | 1805 | C5  | BGLC | 7 | 3.785 | -1.133 | -138.918 | 1.00 | 2.00 | CARE |
| ATOM | 1806 | H5  | BGLC | 7 | 3.059 | -1.964 | -138.804 | 1.00 | 0.00 | CARE |
| ATOM | 1807 | O5  | BGLC | 7 | 3.905 | -0.382 | -137.696 | 1.00 | 2.00 | CARE |
| ATOM | 1808 | C2  | BGLC | 7 | 2.031 | 1.052  | -138.179 | 1.00 | 2.00 | CARE |
| ATOM | 1809 | H2  | BGLC | 7 | 2.606 | 2.033  | -138.205 | 1.00 | 0.00 | CARE |
| ATOM | 1810 | O2  | BGLC | 7 | 0.735 | 1.342  | -137.646 | 1.00 | 2.00 | CARE |
| ATOM | 1811 | HO2 | BGLC | 7 | 0.469 | 2.257  | -137.636 | 1.00 | 0.00 | CARE |
| ATOM | 1812 | C3  | BGLC | 7 | 1.923 | 0.449  | -139.560 | 1.00 | 2.00 | CARE |
| ATOM | 1813 | H3  | BGLC | 7 | 1.199 | -0.364 | -139.511 | 1.00 | 0.00 | CARE |
| ATOM | 1814 | O3  | BGLC | 7 | 1.576 | 1.479  | -140.508 | 1.00 | 2.00 | CARE |
| ATOM | 1815 | HO3 | BGLC | 7 | 0.711 | 1.858  | -140.516 | 1.00 | 0.00 | CARE |
| ATOM | 1816 | C4  | BGLC | 7 | 3.207 | -0.248 | -139.976 | 1.00 | 2.00 | CARE |
| ATOM | 1817 | H4  | BGLC | 7 | 3.921 | 0.538  | -140.200 | 1.00 | 0.00 | CARE |
| ATOM | 1818 | O4  | BGLC | 7 | 3.142 | -0.907 | -141.203 | 1.00 | 2.00 | CARE |
| ATOM | 1819 | C6  | BGLC | 7 | 5.172 | -1.657 | -139.226 | 1.00 | 2.00 | CARE |
| ATOM | 1820 | H61 | BGLC | 7 | 5.694 | -0.754 | -139.702 | 1.00 | 0.00 | CARE |
| ATOM | 1821 | H62 | BGLC | 7 | 5.819 | -1.916 | -138.394 | 1.00 | 0.00 | CARE |
| ATOM | 1822 | O6  | BGLC | 7 | 5.115 | -2.609 | -140.274 | 1.00 | 2.00 | CARE |
| ATOM | 1823 | HO6 | BGLC | 7 | 4.531 | -3.356 | -140.184 | 1.00 | 0.00 | CARE |
| ATOM | 1824 | C1  | BGLC | 8 | 3.311 | -0.280 | -142.382 | 1.00 | 2.00 | CARE |
| ATOM | 1825 | H1  | BGLC | 8 | 3.980 | 0.567  | -142.286 | 1.00 | 0.00 | CARE |
| ATOM | 1826 | C5  | BGLC | 8 | 2.176 | 0.901  | -144.112 | 1.00 | 2.00 | CARE |
| ATOM | 1827 | H5  | BGLC | 8 | 2.902 | 1.733  | -144.002 | 1.00 | 0.00 | CARE |
| ATOM | 1828 | O5  | BGLC | 8 | 2.058 | 0.154  | -142.886 | 1.00 | 2.00 | CARE |
| ATOM | 1829 | C2  | BGLC | 8 | 3.932 | -1.282 | -143.365 | 1.00 | 2.00 | CARE |
| ATOM | 1830 | H2  | BGLC | 8 | 3.358 | -2.264 | -143.388 | 1.00 | 0.00 | CARE |
| ATOM | 1831 | O2  | BGLC | 8 | 5.227 | -1.568 | -142.832 | 1.00 | 2.00 | CARE |
| ATOM | 1832 | HO2 | BGLC | 8 | 5.494 | -2.483 | -142.818 | 1.00 | 0.00 | CARE |
| ATOM | 1833 | C3  | BGLC | 8 | 4.040 | -0.684 | -144.748 | 1.00 | 2.00 | CARE |
| ATOM | 1834 | H3  | BGLC | 8 | 4.764 | 0.129  | -144.704 | 1.00 | 0.00 | CARE |

|      |      |     |      |    |       |                |      |      |      |
|------|------|-----|------|----|-------|----------------|------|------|------|
| ATOM | 1835 | O3  | BGLC | 8  | 4.385 | -1.718-145.692 | 1.00 | 2.00 | CARE |
| ATOM | 1836 | HO3 | BGLC | 8  | 5.249 | -2.098-145.699 | 1.00 | 0.00 | CARE |
| ATOM | 1837 | C4  | BGLC | 8  | 2.755 | 0.011-145.166  | 1.00 | 2.00 | CARE |
| ATOM | 1838 | H4  | BGLC | 8  | 2.041 | -0.777-145.386 | 1.00 | 0.00 | CARE |
| ATOM | 1839 | O4  | BGLC | 8  | 2.819 | 0.665-146.396  | 1.00 | 2.00 | CARE |
| ATOM | 1840 | C6  | BGLC | 8  | 0.790 | 1.423-144.420  | 1.00 | 2.00 | CARE |
| ATOM | 1841 | H61 | BGLC | 8  | 0.268 | 0.518-144.892  | 1.00 | 0.00 | CARE |
| ATOM | 1842 | H62 | BGLC | 8  | 0.144 | 1.685-143.588  | 1.00 | 0.00 | CARE |
| ATOM | 1843 | O6  | BGLC | 8  | 0.846 | 2.372-145.472  | 1.00 | 2.00 | CARE |
| ATOM | 1844 | HO6 | BGLC | 8  | 1.430 | 3.119-145.386  | 1.00 | 0.00 | CARE |
| ATOM | 1845 | C1  | BGLC | 9  | 2.648 | 0.033-147.572  | 1.00 | 2.00 | CARE |
| ATOM | 1846 | H1  | BGLC | 9  | 1.979 | -0.814-147.471 | 1.00 | 0.00 | CARE |
| ATOM | 1847 | C5  | BGLC | 9  | 3.782 | -1.154-149.298 | 1.00 | 2.00 | CARE |
| ATOM | 1848 | H5  | BGLC | 9  | 3.056 | -1.985-149.184 | 1.00 | 0.00 | CARE |
| ATOM | 1849 | O5  | BGLC | 9  | 3.901 | -0.402-148.076 | 1.00 | 2.00 | CARE |
| ATOM | 1850 | C2  | BGLC | 9  | 2.026 | 1.032-148.559  | 1.00 | 2.00 | CARE |
| ATOM | 1851 | H2  | BGLC | 9  | 2.601 | 2.013-148.586  | 1.00 | 0.00 | CARE |
| ATOM | 1852 | O2  | BGLC | 9  | 0.730 | 1.322-148.026  | 1.00 | 2.00 | CARE |
| ATOM | 1853 | HO2 | BGLC | 9  | 0.464 | 2.237-148.016  | 1.00 | 0.00 | CARE |
| ATOM | 1854 | C3  | BGLC | 9  | 1.917 | 0.428-149.940  | 1.00 | 2.00 | CARE |
| ATOM | 1855 | H3  | BGLC | 9  | 1.193 | -0.385-149.893 | 1.00 | 0.00 | CARE |
| ATOM | 1856 | O3  | BGLC | 9  | 1.573 | 1.458-150.888  | 1.00 | 2.00 | CARE |
| ATOM | 1857 | HO3 | BGLC | 9  | 0.709 | 1.839-150.897  | 1.00 | 0.00 | CARE |
| ATOM | 1858 | C4  | BGLC | 9  | 3.202 | -0.268-150.356 | 1.00 | 2.00 | CARE |
| ATOM | 1859 | H4  | BGLC | 9  | 3.916 | 0.519-150.580  | 1.00 | 0.00 | CARE |
| ATOM | 1860 | O4  | BGLC | 9  | 3.137 | -0.927-151.582 | 1.00 | 2.00 | CARE |
| ATOM | 1861 | C6  | BGLC | 9  | 5.167 | -1.678-149.606 | 1.00 | 2.00 | CARE |
| ATOM | 1862 | H61 | BGLC | 9  | 5.689 | -0.774-150.082 | 1.00 | 0.00 | CARE |
| ATOM | 1863 | H62 | BGLC | 9  | 5.814 | -1.937-148.774 | 1.00 | 0.00 | CARE |
| ATOM | 1864 | O6  | BGLC | 9  | 5.110 | -2.630-150.654 | 1.00 | 2.00 | CARE |
| ATOM | 1865 | HO6 | BGLC | 9  | 4.526 | -3.377-150.565 | 1.00 | 0.00 | CARE |
| ATOM | 1866 | C1  | BGLC | 10 | 3.306 | -0.301-152.762 | 1.00 | 2.00 | CARE |
| ATOM | 1867 | H1  | BGLC | 10 | 3.976 | 0.546-152.667  | 1.00 | 0.00 | CARE |
| ATOM | 1868 | C5  | BGLC | 10 | 2.172 | 0.880-154.492  | 1.00 | 2.00 | CARE |
| ATOM | 1869 | H5  | BGLC | 10 | 2.898 | 1.711-154.382  | 1.00 | 0.00 | CARE |
| ATOM | 1870 | O5  | BGLC | 10 | 2.053 | 0.133-153.266  | 1.00 | 2.00 | CARE |
| ATOM | 1871 | C2  | BGLC | 10 | 3.928 | -1.303-153.745 | 1.00 | 2.00 | CARE |
| ATOM | 1872 | H2  | BGLC | 10 | 3.354 | -2.285-153.768 | 1.00 | 0.00 | CARE |
| ATOM | 1873 | O2  | BGLC | 10 | 5.223 | -1.589-153.212 | 1.00 | 2.00 | CARE |
| ATOM | 1874 | HO2 | BGLC | 10 | 5.490 | -2.504-153.198 | 1.00 | 0.00 | CARE |
| ATOM | 1875 | C3  | BGLC | 10 | 4.035 | -0.704-155.128 | 1.00 | 2.00 | CARE |
| ATOM | 1876 | H3  | BGLC | 10 | 4.759 | 0.109-155.084  | 1.00 | 0.00 | CARE |
| ATOM | 1877 | O3  | BGLC | 10 | 4.380 | -1.738-156.072 | 1.00 | 2.00 | CARE |
| ATOM | 1878 | HO3 | BGLC | 10 | 5.244 | -2.118-156.080 | 1.00 | 0.00 | CARE |
| ATOM | 1879 | C4  | BGLC | 10 | 2.750 | -0.009-155.546 | 1.00 | 2.00 | CARE |
| ATOM | 1880 | H4  | BGLC | 10 | 2.036 | -0.797-155.766 | 1.00 | 0.00 | CARE |
| ATOM | 1881 | O4  | BGLC | 10 | 2.814 | 0.643-156.775  | 1.00 | 2.00 | CARE |
| ATOM | 1882 | C6  | BGLC | 10 | 0.786 | 1.402-154.800  | 1.00 | 2.00 | CARE |
| ATOM | 1883 | H61 | BGLC | 10 | 0.264 | 0.496-155.271  | 1.00 | 0.00 | CARE |
| ATOM | 1884 | H62 | BGLC | 10 | 0.140 | 1.664-153.968  | 1.00 | 0.00 | CARE |
| ATOM | 1885 | O6  | BGLC | 10 | 0.841 | 2.350-155.852  | 1.00 | 2.00 | CARE |
| ATOM | 1886 | HO6 | BGLC | 10 | 1.425 | 3.097-155.766  | 1.00 | 0.00 | CARE |
| ATOM | 1887 | C1  | BGLC | 11 | 2.644 | 0.013-157.952  | 1.00 | 2.00 | CARE |
| ATOM | 1888 | H1  | BGLC | 11 | 1.974 | -0.833-157.853 | 1.00 | 0.00 | CARE |

|      |      |     |      |    |       |                |      |      |      |
|------|------|-----|------|----|-------|----------------|------|------|------|
| ATOM | 1889 | C5  | BGLC | 11 | 3.777 | -1.175-159.678 | 1.00 | 2.00 | CARE |
| ATOM | 1890 | H5  | BGLC | 11 | 3.052 | -2.006-159.564 | 1.00 | 0.00 | CARE |
| ATOM | 1891 | O5  | BGLC | 11 | 3.897 | -0.424-158.456 | 1.00 | 2.00 | CARE |
| ATOM | 1892 | C2  | BGLC | 11 | 2.021 | 1.011-158.939  | 1.00 | 2.00 | CARE |
| ATOM | 1893 | H2  | BGLC | 11 | 2.595 | 1.993-158.966  | 1.00 | 0.00 | CARE |
| ATOM | 1894 | O2  | BGLC | 11 | 0.726 | 1.300-158.406  | 1.00 | 2.00 | CARE |
| ATOM | 1895 | HO2 | BGLC | 11 | 0.460 | 2.215-158.396  | 1.00 | 0.00 | CARE |
| ATOM | 1896 | C3  | BGLC | 11 | 1.913 | 0.407-160.320  | 1.00 | 2.00 | CARE |
| ATOM | 1897 | H3  | BGLC | 11 | 1.189 | -0.406-160.272 | 1.00 | 0.00 | CARE |
| ATOM | 1898 | O3  | BGLC | 11 | 1.567 | 1.437-161.268  | 1.00 | 2.00 | CARE |
| ATOM | 1899 | HO3 | BGLC | 11 | 0.703 | 1.817-161.277  | 1.00 | 0.00 | CARE |
| ATOM | 1900 | C4  | BGLC | 11 | 3.198 | -0.290-160.736 | 1.00 | 2.00 | CARE |
| ATOM | 1901 | H4  | BGLC | 11 | 3.912 | 0.496-160.960  | 1.00 | 0.00 | CARE |
| ATOM | 1902 | O4  | BGLC | 11 | 3.132 | -0.948-161.962 | 1.00 | 2.00 | CARE |
| ATOM | 1903 | C6  | BGLC | 11 | 5.163 | -1.698-159.986 | 1.00 | 2.00 | CARE |
| ATOM | 1904 | H61 | BGLC | 11 | 5.684 | -0.795-160.462 | 1.00 | 0.00 | CARE |
| ATOM | 1905 | H62 | BGLC | 11 | 5.811 | -1.956-159.154 | 1.00 | 0.00 | CARE |
| ATOM | 1906 | O6  | BGLC | 11 | 5.106 | -2.651-161.034 | 1.00 | 2.00 | CARE |
| ATOM | 1907 | HO6 | BGLC | 11 | 4.523 | -3.398-160.944 | 1.00 | 0.00 | CARE |
| ATOM | 1908 | C1  | BGLC | 12 | 3.302 | -0.321-163.142 | 1.00 | 2.00 | CARE |
| ATOM | 1909 | H1  | BGLC | 12 | 3.972 | 0.526-163.045  | 1.00 | 0.00 | CARE |
| ATOM | 1910 | C5  | BGLC | 12 | 2.167 | 0.859-164.872  | 1.00 | 2.00 | CARE |
| ATOM | 1911 | H5  | BGLC | 12 | 2.893 | 1.691-164.763  | 1.00 | 0.00 | CARE |
| ATOM | 1912 | O5  | BGLC | 12 | 2.049 | 0.113-163.646  | 1.00 | 2.00 | CARE |
| ATOM | 1913 | C2  | BGLC | 12 | 3.924 | -1.323-164.125 | 1.00 | 2.00 | CARE |
| ATOM | 1914 | H2  | BGLC | 12 | 3.349 | -2.304-164.147 | 1.00 | 0.00 | CARE |
| ATOM | 1915 | O2  | BGLC | 12 | 5.218 | -1.611-163.592 | 1.00 | 2.00 | CARE |
| ATOM | 1916 | HO2 | BGLC | 12 | 5.483 | -2.526-163.579 | 1.00 | 0.00 | CARE |
| ATOM | 1917 | C3  | BGLC | 12 | 4.031 | -0.725-165.508 | 1.00 | 2.00 | CARE |
| ATOM | 1918 | H3  | BGLC | 12 | 4.755 | 0.088-165.465  | 1.00 | 0.00 | CARE |
| ATOM | 1919 | O3  | BGLC | 12 | 4.375 | -1.759-166.452 | 1.00 | 2.00 | CARE |
| ATOM | 1920 | HO3 | BGLC | 12 | 5.239 | -2.139-166.460 | 1.00 | 0.00 | CARE |
| ATOM | 1921 | C4  | BGLC | 12 | 2.746 | -0.030-165.926 | 1.00 | 2.00 | CARE |
| ATOM | 1922 | H4  | BGLC | 12 | 2.033 | -0.819-166.145 | 1.00 | 0.00 | CARE |
| ATOM | 1923 | O4  | BGLC | 12 | 2.809 | 0.622-167.155  | 1.00 | 2.00 | CARE |
| ATOM | 1924 | C6  | BGLC | 12 | 0.781 | 1.381-165.180  | 1.00 | 2.00 | CARE |
| ATOM | 1925 | H61 | BGLC | 12 | 0.259 | 0.476-165.653  | 1.00 | 0.00 | CARE |
| ATOM | 1926 | H62 | BGLC | 12 | 0.135 | 1.643-164.348  | 1.00 | 0.00 | CARE |
| ATOM | 1927 | O6  | BGLC | 12 | 0.838 | 2.330-166.232  | 1.00 | 2.00 | CARE |
| ATOM | 1928 | HO6 | BGLC | 12 | 1.422 | 3.077-166.145  | 1.00 | 0.00 | CARE |
| ATOM | 1929 | C1  | BGLC | 13 | 2.639 | -0.008-168.332 | 1.00 | 2.00 | CARE |
| ATOM | 1930 | H1  | BGLC | 13 | 1.969 | -0.854-168.233 | 1.00 | 0.00 | CARE |
| ATOM | 1931 | C5  | BGLC | 13 | 3.773 | -1.195-170.058 | 1.00 | 2.00 | CARE |
| ATOM | 1932 | H5  | BGLC | 13 | 3.047 | -2.026-169.944 | 1.00 | 0.00 | CARE |
| ATOM | 1933 | O5  | BGLC | 13 | 3.892 | -0.444-168.836 | 1.00 | 2.00 | CARE |
| ATOM | 1934 | C2  | BGLC | 13 | 2.017 | 0.990-169.319  | 1.00 | 2.00 | CARE |
| ATOM | 1935 | H2  | BGLC | 13 | 2.592 | 1.971-169.346  | 1.00 | 0.00 | CARE |
| ATOM | 1936 | O2  | BGLC | 13 | 0.721 | 1.280-168.786  | 1.00 | 2.00 | CARE |
| ATOM | 1937 | HO2 | BGLC | 13 | 0.455 | 2.195-168.776  | 1.00 | 0.00 | CARE |
| ATOM | 1938 | C3  | BGLC | 13 | 1.908 | 0.387-170.700  | 1.00 | 2.00 | CARE |
| ATOM | 1939 | H3  | BGLC | 13 | 1.184 | -0.426-170.652 | 1.00 | 0.00 | CARE |
| ATOM | 1940 | O3  | BGLC | 13 | 1.563 | 1.416-171.648  | 1.00 | 2.00 | CARE |
| ATOM | 1941 | HO3 | BGLC | 13 | 0.699 | 1.796-171.657  | 1.00 | 0.00 | CARE |
| ATOM | 1942 | C4  | BGLC | 13 | 3.193 | -0.310-171.116 | 1.00 | 2.00 | CARE |

|      |      |     |      |    |       |                |      |      |      |
|------|------|-----|------|----|-------|----------------|------|------|------|
| ATOM | 1943 | H4  | BGLC | 13 | 3.906 | 0.478-171.339  | 1.00 | 0.00 | CARE |
| ATOM | 1944 | O4  | BGLC | 13 | 3.129 | -0.968-172.342 | 1.00 | 2.00 | CARE |
| ATOM | 1945 | C6  | BGLC | 13 | 5.158 | -1.719-170.366 | 1.00 | 2.00 | CARE |
| ATOM | 1946 | H61 | BGLC | 13 | 5.680 | -0.815-170.842 | 1.00 | 0.00 | CARE |
| ATOM | 1947 | H62 | BGLC | 13 | 5.805 | -1.978-169.534 | 1.00 | 0.00 | CARE |
| ATOM | 1948 | O6  | BGLC | 13 | 5.101 | -2.671-171.414 | 1.00 | 2.00 | CARE |
| ATOM | 1949 | HO6 | BGLC | 13 | 4.517 | -3.418-171.325 | 1.00 | 0.00 | CARE |
| ATOM | 1950 | C1  | BGLC | 14 | 3.298 | -0.342-173.522 | 1.00 | 2.00 | CARE |
| ATOM | 1951 | H1  | BGLC | 14 | 3.967 | 0.505-173.426  | 1.00 | 0.00 | CARE |
| ATOM | 1952 | C5  | BGLC | 14 | 2.162 | 0.839-175.252  | 1.00 | 2.00 | CARE |
| ATOM | 1953 | H5  | BGLC | 14 | 2.888 | 1.671-175.142  | 1.00 | 0.00 | CARE |
| ATOM | 1954 | O5  | BGLC | 14 | 2.044 | 0.091-174.026  | 1.00 | 2.00 | CARE |
| ATOM | 1955 | C2  | BGLC | 14 | 3.919 | -1.344-174.505 | 1.00 | 2.00 | CARE |
| ATOM | 1956 | H2  | BGLC | 14 | 3.344 | -2.325-174.527 | 1.00 | 0.00 | CARE |
| ATOM | 1957 | O2  | BGLC | 14 | 5.213 | -1.631-173.972 | 1.00 | 2.00 | CARE |
| ATOM | 1958 | HO2 | BGLC | 14 | 5.479 | -2.546-173.958 | 1.00 | 0.00 | CARE |
| ATOM | 1959 | C3  | BGLC | 14 | 4.026 | -0.747-175.888 | 1.00 | 2.00 | CARE |
| ATOM | 1960 | H3  | BGLC | 14 | 4.750 | 0.066-175.844  | 1.00 | 0.00 | CARE |
| ATOM | 1961 | O3  | BGLC | 14 | 4.371 | -1.780-176.832 | 1.00 | 2.00 | CARE |
| ATOM | 1962 | HO3 | BGLC | 14 | 5.235 | -2.160-176.840 | 1.00 | 0.00 | CARE |
| ATOM | 1963 | C4  | BGLC | 14 | 2.741 | -0.052-176.306 | 1.00 | 2.00 | CARE |
| ATOM | 1964 | H4  | BGLC | 14 | 2.027 | -0.840-176.525 | 1.00 | 0.00 | CARE |
| ATOM | 1965 | O4  | BGLC | 14 | 2.804 | 0.602-177.535  | 1.00 | 2.00 | CARE |
| ATOM | 1966 | C6  | BGLC | 14 | 0.777 | 1.361-175.560  | 1.00 | 2.00 | CARE |
| ATOM | 1967 | H61 | BGLC | 14 | 0.255 | 0.455-176.031  | 1.00 | 0.00 | CARE |
| ATOM | 1968 | H62 | BGLC | 14 | 0.131 | 1.623-174.728  | 1.00 | 0.00 | CARE |
| ATOM | 1969 | O6  | BGLC | 14 | 0.832 | 2.309-176.612  | 1.00 | 2.00 | CARE |
| ATOM | 1970 | HO6 | BGLC | 14 | 1.416 | 3.056-176.526  | 1.00 | 0.00 | CARE |
| ATOM | 1971 | C1  | BGLC | 15 | 2.635 | -0.029-178.712 | 1.00 | 2.00 | CARE |
| ATOM | 1972 | H1  | BGLC | 15 | 1.966 | -0.876-178.612 | 1.00 | 0.00 | CARE |
| ATOM | 1973 | C5  | BGLC | 15 | 3.768 | -1.216-180.438 | 1.00 | 2.00 | CARE |
| ATOM | 1974 | H5  | BGLC | 15 | 3.043 | -2.047-180.323 | 1.00 | 0.00 | CARE |
| ATOM | 1975 | O5  | BGLC | 15 | 3.888 | -0.464-179.216 | 1.00 | 2.00 | CARE |
| ATOM | 1976 | C2  | BGLC | 15 | 2.012 | 0.969-179.699  | 1.00 | 2.00 | CARE |
| ATOM | 1977 | H2  | BGLC | 15 | 2.587 | 1.950-179.725  | 1.00 | 0.00 | CARE |
| ATOM | 1978 | O2  | BGLC | 15 | 0.717 | 1.259-179.166  | 1.00 | 2.00 | CARE |
| ATOM | 1979 | HO2 | BGLC | 15 | 0.451 | 2.174-179.157  | 1.00 | 0.00 | CARE |
| ATOM | 1980 | C3  | BGLC | 15 | 1.904 | 0.366-181.080  | 1.00 | 2.00 | CARE |
| ATOM | 1981 | H3  | BGLC | 15 | 1.180 | -0.447-181.032 | 1.00 | 0.00 | CARE |
| ATOM | 1982 | O3  | BGLC | 15 | 1.558 | 1.396-182.028  | 1.00 | 2.00 | CARE |
| ATOM | 1983 | HO3 | BGLC | 15 | 0.694 | 1.776-182.037  | 1.00 | 0.00 | CARE |
| ATOM | 1984 | C4  | BGLC | 15 | 3.188 | -0.331-181.496 | 1.00 | 2.00 | CARE |
| ATOM | 1985 | H4  | BGLC | 15 | 3.901 | 0.457-181.719  | 1.00 | 0.00 | CARE |
| ATOM | 1986 | O4  | BGLC | 15 | 3.125 | -0.989-182.722 | 1.00 | 2.00 | CARE |
| ATOM | 1987 | C6  | BGLC | 15 | 5.153 | -1.739-180.746 | 1.00 | 2.00 | CARE |
| ATOM | 1988 | H61 | BGLC | 15 | 5.674 | -0.835-181.221 | 1.00 | 0.00 | CARE |
| ATOM | 1989 | H62 | BGLC | 15 | 5.801 | -1.998-179.914 | 1.00 | 0.00 | CARE |
| ATOM | 1990 | O6  | BGLC | 15 | 5.098 | -2.692-181.794 | 1.00 | 2.00 | CARE |
| ATOM | 1991 | HO6 | BGLC | 15 | 4.515 | -3.439-181.705 | 1.00 | 0.00 | CARE |
| ATOM | 1992 | C1  | BGLC | 16 | 3.293 | -0.363-183.902 | 1.00 | 2.00 | CARE |
| ATOM | 1993 | H1  | BGLC | 16 | 3.962 | 0.484-183.807  | 1.00 | 0.00 | CARE |
| ATOM | 1994 | C5  | BGLC | 16 | 2.158 | 0.817-185.632  | 1.00 | 2.00 | CARE |
| ATOM | 1995 | H5  | BGLC | 16 | 2.885 | 1.648-185.522  | 1.00 | 0.00 | CARE |
| ATOM | 1996 | O5  | BGLC | 16 | 2.039 | 0.071-184.406  | 1.00 | 2.00 | CARE |

|      |      |     |      |    |       |                |      |      |      |
|------|------|-----|------|----|-------|----------------|------|------|------|
| ATOM | 1997 | C2  | BGLC | 16 | 3.915 | -1.365-184.885 | 1.00 | 2.00 | CARE |
| ATOM | 1998 | H2  | BGLC | 16 | 3.341 | -2.347-184.908 | 1.00 | 0.00 | CARE |
| ATOM | 1999 | O2  | BGLC | 16 | 5.209 | -1.651-184.352 | 1.00 | 2.00 | CARE |
| ATOM | 2000 | HO2 | BGLC | 16 | 5.476 | -2.566-184.338 | 1.00 | 0.00 | CARE |
| ATOM | 2001 | C3  | BGLC | 16 | 4.022 | -0.767-186.268 | 1.00 | 2.00 | CARE |
| ATOM | 2002 | H3  | BGLC | 16 | 4.746 | 0.046-186.225  | 1.00 | 0.00 | CARE |
| ATOM | 2003 | O3  | BGLC | 16 | 4.366 | -1.801-187.212 | 1.00 | 2.00 | CARE |
| ATOM | 2004 | HO3 | BGLC | 16 | 5.230 | -2.181-187.220 | 1.00 | 0.00 | CARE |
| ATOM | 2005 | C4  | BGLC | 16 | 2.737 | -0.073-186.686 | 1.00 | 2.00 | CARE |
| ATOM | 2006 | H4  | BGLC | 16 | 2.024 | -0.862-186.905 | 1.00 | 0.00 | CARE |
| ATOM | 2007 | O4  | BGLC | 16 | 2.799 | 0.582-187.915  | 1.00 | 2.00 | CARE |
| ATOM | 2008 | C6  | BGLC | 16 | 0.773 | 1.340-185.940  | 1.00 | 2.00 | CARE |
| ATOM | 2009 | H61 | BGLC | 16 | 0.250 | 0.434-186.410  | 1.00 | 0.00 | CARE |
| ATOM | 2010 | H62 | BGLC | 16 | 0.127 | 1.603-185.108  | 1.00 | 0.00 | CARE |
| ATOM | 2011 | O6  | BGLC | 16 | 0.828 | 2.287-186.992  | 1.00 | 2.00 | CARE |
| ATOM | 2012 | HO6 | BGLC | 16 | 1.412 | 3.034-186.907  | 1.00 | 0.00 | CARE |
| ATOM | 2013 | C1  | BGLC | 17 | 2.630 | -0.049-189.092 | 1.00 | 2.00 | CARE |
| ATOM | 2014 | H1  | BGLC | 17 | 1.960 | -0.895-188.993 | 1.00 | 0.00 | CARE |
| ATOM | 2015 | C5  | BGLC | 17 | 3.763 | -1.237-190.818 | 1.00 | 2.00 | CARE |
| ATOM | 2016 | H5  | BGLC | 17 | 3.037 | -2.068-190.704 | 1.00 | 0.00 | CARE |
| ATOM | 2017 | O5  | BGLC | 17 | 3.883 | -0.486-189.596 | 1.00 | 2.00 | CARE |
| ATOM | 2018 | C2  | BGLC | 17 | 2.008 | 0.949-190.079  | 1.00 | 2.00 | CARE |
| ATOM | 2019 | H2  | BGLC | 17 | 2.582 | 1.931-190.105  | 1.00 | 0.00 | CARE |
| ATOM | 2020 | O2  | BGLC | 17 | 0.713 | 1.237-189.546  | 1.00 | 2.00 | CARE |
| ATOM | 2021 | HO2 | BGLC | 17 | 0.446 | 2.152-189.536  | 1.00 | 0.00 | CARE |
| ATOM | 2022 | C3  | BGLC | 17 | 1.900 | 0.346-191.460  | 1.00 | 2.00 | CARE |
| ATOM | 2023 | H3  | BGLC | 17 | 1.176 | -0.467-191.411 | 1.00 | 0.00 | CARE |
| ATOM | 2024 | O3  | BGLC | 17 | 1.554 | 1.375-192.408  | 1.00 | 2.00 | CARE |
| ATOM | 2025 | HO3 | BGLC | 17 | 0.690 | 1.754-192.417  | 1.00 | 0.00 | CARE |
| ATOM | 2026 | C4  | BGLC | 17 | 3.184 | -0.351-191.876 | 1.00 | 2.00 | CARE |
| ATOM | 2027 | H4  | BGLC | 17 | 3.898 | 0.436-192.099  | 1.00 | 0.00 | CARE |
| ATOM | 2028 | O4  | BGLC | 17 | 3.120 | -1.010-193.102 | 1.00 | 2.00 | CARE |
| ATOM | 2029 | C6  | BGLC | 17 | 5.149 | -1.761-191.126 | 1.00 | 2.00 | CARE |
| ATOM | 2030 | H61 | BGLC | 17 | 5.671 | -0.857-191.601 | 1.00 | 0.00 | CARE |
| ATOM | 2031 | H62 | BGLC | 17 | 5.796 | -2.021-190.294 | 1.00 | 0.00 | CARE |
| ATOM | 2032 | O6  | BGLC | 17 | 5.093 | -2.712-192.174 | 1.00 | 2.00 | CARE |
| ATOM | 2033 | HO6 | BGLC | 17 | 4.509 | -3.459-192.085 | 1.00 | 0.00 | CARE |
| ATOM | 2034 | C1  | BGLC | 18 | 3.289 | -0.384-194.282 | 1.00 | 2.00 | CARE |
| ATOM | 2035 | H1  | BGLC | 18 | 3.959 | 0.463-194.187  | 1.00 | 0.00 | CARE |
| ATOM | 2036 | C5  | BGLC | 18 | 2.155 | 0.797-196.012  | 1.00 | 2.00 | CARE |
| ATOM | 2037 | H5  | BGLC | 18 | 2.881 | 1.629-195.902  | 1.00 | 0.00 | CARE |
| ATOM | 2038 | O5  | BGLC | 18 | 2.036 | 0.050-194.786  | 1.00 | 2.00 | CARE |
| ATOM | 2039 | C2  | BGLC | 18 | 3.910 | -1.386-195.265 | 1.00 | 2.00 | CARE |
| ATOM | 2040 | H2  | BGLC | 18 | 3.336 | -2.368-195.288 | 1.00 | 0.00 | CARE |
| ATOM | 2041 | O2  | BGLC | 18 | 5.205 | -1.672-194.732 | 1.00 | 2.00 | CARE |
| ATOM | 2042 | HO2 | BGLC | 18 | 5.472 | -2.587-194.718 | 1.00 | 0.00 | CARE |
| ATOM | 2043 | C3  | BGLC | 18 | 4.018 | -0.788-196.648 | 1.00 | 2.00 | CARE |
| ATOM | 2044 | H3  | BGLC | 18 | 4.742 | 0.025-196.604  | 1.00 | 0.00 | CARE |
| ATOM | 2045 | O3  | BGLC | 18 | 4.362 | -1.821-197.592 | 1.00 | 2.00 | CARE |
| ATOM | 2046 | HO3 | BGLC | 18 | 5.226 | -2.202-197.600 | 1.00 | 0.00 | CARE |
| ATOM | 2047 | C4  | BGLC | 18 | 2.732 | -0.093-197.066 | 1.00 | 2.00 | CARE |
| ATOM | 2048 | H4  | BGLC | 18 | 2.017 | -0.880-197.285 | 1.00 | 0.00 | CARE |
| ATOM | 2049 | O4  | BGLC | 18 | 2.796 | 0.561-198.295  | 1.00 | 2.00 | CARE |
| ATOM | 2050 | C6  | BGLC | 18 | 0.768 | 1.319-196.320  | 1.00 | 2.00 | CARE |

|      |      |     |      |    |       |                |      |      |      |
|------|------|-----|------|----|-------|----------------|------|------|------|
| ATOM | 2051 | H61 | BGLC | 18 | 0.246 | 0.413-196.791  | 1.00 | 0.00 | CARE |
| ATOM | 2052 | H62 | BGLC | 18 | 0.122 | 1.581-195.488  | 1.00 | 0.00 | CARE |
| ATOM | 2053 | O6  | BGLC | 18 | 0.823 | 2.267-197.372  | 1.00 | 2.00 | CARE |
| ATOM | 2054 | HO6 | BGLC | 18 | 1.407 | 3.014-197.286  | 1.00 | 0.00 | CARE |
| ATOM | 2055 | C1  | BGLC | 19 | 2.625 | -0.070-199.472 | 1.00 | 2.00 | CARE |
| ATOM | 2056 | H1  | BGLC | 19 | 1.956 | -0.916-199.372 | 1.00 | 0.00 | CARE |
| ATOM | 2057 | C5  | BGLC | 19 | 3.758 | -1.258-201.198 | 1.00 | 2.00 | CARE |
| ATOM | 2058 | H5  | BGLC | 19 | 3.032 | -2.089-201.083 | 1.00 | 0.00 | CARE |
| ATOM | 2059 | O5  | BGLC | 19 | 3.879 | -0.506-199.976 | 1.00 | 2.00 | CARE |
| ATOM | 2060 | C2  | BGLC | 19 | 2.003 | 0.928-200.459  | 1.00 | 2.00 | CARE |
| ATOM | 2061 | H2  | BGLC | 19 | 2.578 | 1.909-200.485  | 1.00 | 0.00 | CARE |
| ATOM | 2062 | O2  | BGLC | 19 | 0.709 | 1.218-199.926  | 1.00 | 2.00 | CARE |
| ATOM | 2063 | HO2 | BGLC | 19 | 0.443 | 2.133-199.916  | 1.00 | 0.00 | CARE |
| ATOM | 2064 | C3  | BGLC | 19 | 1.895 | 0.325-201.840  | 1.00 | 2.00 | CARE |
| ATOM | 2065 | H3  | BGLC | 19 | 1.171 | -0.488-201.793 | 1.00 | 0.00 | CARE |
| ATOM | 2066 | O3  | BGLC | 19 | 1.550 | 1.355-202.787  | 1.00 | 2.00 | CARE |
| ATOM | 2067 | HO3 | BGLC | 19 | 0.686 | 1.735-202.796  | 1.00 | 0.00 | CARE |
| ATOM | 2068 | C4  | BGLC | 19 | 3.180 | -0.371-202.256 | 1.00 | 2.00 | CARE |
| ATOM | 2069 | H4  | BGLC | 19 | 3.895 | 0.415-202.479  | 1.00 | 0.00 | CARE |
| ATOM | 2070 | O4  | BGLC | 19 | 3.116 | -1.031-203.482 | 1.00 | 2.00 | CARE |
| ATOM | 2071 | C6  | BGLC | 19 | 5.145 | -1.782-201.506 | 1.00 | 2.00 | CARE |
| ATOM | 2072 | H61 | BGLC | 19 | 5.667 | -0.878-201.981 | 1.00 | 0.00 | CARE |
| ATOM | 2073 | H62 | BGLC | 19 | 5.792 | -2.041-200.674 | 1.00 | 0.00 | CARE |
| ATOM | 2074 | O6  | BGLC | 19 | 5.088 | -2.733-202.554 | 1.00 | 2.00 | CARE |
| ATOM | 2075 | HO6 | BGLC | 19 | 4.504 | -3.480-202.465 | 1.00 | 0.00 | CARE |
| ATOM | 2076 | C1  | BGLC | 20 | 3.285 | -0.404-204.662 | 1.00 | 2.00 | CARE |
| ATOM | 2077 | H1  | BGLC | 20 | 3.954 | 0.443-204.566  | 1.00 | 0.00 | CARE |
| ATOM | 2078 | C5  | BGLC | 20 | 2.150 | 0.776-206.392  | 1.00 | 2.00 | CARE |
| ATOM | 2079 | H5  | BGLC | 20 | 2.876 | 1.607-206.282  | 1.00 | 0.00 | CARE |
| ATOM | 2080 | O5  | BGLC | 20 | 2.031 | 0.030-205.166  | 1.00 | 2.00 | CARE |
| ATOM | 2081 | C2  | BGLC | 20 | 3.906 | -1.407-205.645 | 1.00 | 2.00 | CARE |
| ATOM | 2082 | H2  | BGLC | 20 | 3.332 | -2.389-205.668 | 1.00 | 0.00 | CARE |
| ATOM | 2083 | O2  | BGLC | 20 | 5.201 | -1.693-205.112 | 1.00 | 2.00 | CARE |
| ATOM | 2084 | HO2 | BGLC | 20 | 5.467 | -2.608-205.098 | 1.00 | 0.00 | CARE |
| ATOM | 2085 | C3  | BGLC | 20 | 4.013 | -0.808-207.028 | 1.00 | 2.00 | CARE |
| ATOM | 2086 | H3  | BGLC | 20 | 4.737 | 0.005-206.984  | 1.00 | 0.00 | CARE |
| ATOM | 2087 | O3  | BGLC | 20 | 4.357 | -1.841-207.972 | 1.00 | 2.00 | CARE |
| ATOM | 2088 | HO3 | BGLC | 20 | 5.221 | -2.221-207.980 | 1.00 | 0.00 | CARE |
| ATOM | 2089 | C4  | BGLC | 20 | 2.728 | -0.113-207.446 | 1.00 | 2.00 | CARE |
| ATOM | 2090 | H4  | BGLC | 20 | 1.978 | -0.842-207.735 | 1.00 | 0.00 | CARE |
| ATOM | 2091 | O4  | BGLC | 20 | 2.898 | 0.630-208.667  | 1.00 | 2.00 | CARE |
| ATOM | 2092 | HO4 | BGLC | 20 | 3.360 | 0.062-209.335  | 1.00 | 0.00 | CARE |
| ATOM | 2093 | C6  | BGLC | 20 | 0.763 | 1.299-206.700  | 1.00 | 2.00 | CARE |
| ATOM | 2094 | H61 | BGLC | 20 | 0.240 | 0.394-207.171  | 1.00 | 0.00 | CARE |
| ATOM | 2095 | H62 | BGLC | 20 | 0.117 | 1.562-205.868  | 1.00 | 0.00 | CARE |
| ATOM | 2096 | O6  | BGLC | 20 | 0.820 | 2.246-207.752  | 1.00 | 2.00 | CARE |
| ATOM | 2097 | HO6 | BGLC | 20 | 1.405 | 2.993-207.666  | 1.00 | 0.00 | CARE |
| ATOM | 2098 | C1  | BGLC | 1  | 8.661 | -5.478-106.044 | 1.00 | 2.00 | CARF |
| ATOM | 2099 | H1  | BGLC | 1  | 7.901 | -6.239-105.911 | 1.00 | 0.00 | CARF |
| ATOM | 2100 | O1  | BGLC | 1  | 8.939 | -4.757-104.858 | 1.00 | 2.00 | CARF |
| ATOM | 2101 | HO1 | BGLC | 1  | 9.326 | -3.951-105.123 | 1.00 | 0.00 | CARF |
| ATOM | 2102 | C5  | BGLC | 1  | 9.795 | -6.665-107.770 | 1.00 | 2.00 | CARF |
| ATOM | 2103 | H5  | BGLC | 1  | 9.068 | -7.495-107.658 | 1.00 | 0.00 | CARF |
| ATOM | 2104 | O5  | BGLC | 1  | 9.914 | -5.915-106.547 | 1.00 | 2.00 | CARF |

|      |      |     |      |   |        |        |          |      |      |      |
|------|------|-----|------|---|--------|--------|----------|------|------|------|
| ATOM | 2105 | C2  | BGLC | 1 | 8.040  | -4.480 | -107.030 | 1.00 | 2.00 | CARF |
| ATOM | 2106 | H2  | BGLC | 1 | 8.614  | -3.499 | -107.057 | 1.00 | 0.00 | CARF |
| ATOM | 2107 | O2  | BGLC | 1 | 6.745  | -4.191 | -106.497 | 1.00 | 2.00 | CARF |
| ATOM | 2108 | HO2 | BGLC | 1 | 6.479  | -3.276 | -106.487 | 1.00 | 0.00 | CARF |
| ATOM | 2109 | C3  | BGLC | 1 | 7.931  | -5.084 | -108.411 | 1.00 | 2.00 | CARF |
| ATOM | 2110 | H3  | BGLC | 1 | 7.208  | -5.897 | -108.362 | 1.00 | 0.00 | CARF |
| ATOM | 2111 | O3  | BGLC | 1 | 7.584  | -4.055 | -109.359 | 1.00 | 2.00 | CARF |
| ATOM | 2112 | HO3 | BGLC | 1 | 6.719  | -3.676 | -109.367 | 1.00 | 0.00 | CARF |
| ATOM | 2113 | C4  | BGLC | 1 | 9.215  | -5.780 | -108.827 | 1.00 | 2.00 | CARF |
| ATOM | 2114 | H4  | BGLC | 1 | 9.928  | -4.992 | -109.050 | 1.00 | 0.00 | CARF |
| ATOM | 2115 | O4  | BGLC | 1 | 9.151  | -6.438 | -110.054 | 1.00 | 2.00 | CARF |
| ATOM | 2116 | C6  | BGLC | 1 | 11.180 | -7.191 | -108.077 | 1.00 | 2.00 | CARF |
| ATOM | 2117 | H61 | BGLC | 1 | 11.703 | -6.287 | -108.551 | 1.00 | 0.00 | CARF |
| ATOM | 2118 | H62 | BGLC | 1 | 11.826 | -7.452 | -107.245 | 1.00 | 0.00 | CARF |
| ATOM | 2119 | O6  | BGLC | 1 | 11.124 | -8.142 | -109.125 | 1.00 | 2.00 | CARF |
| ATOM | 2120 | HO6 | BGLC | 1 | 10.539 | -8.888 | -109.037 | 1.00 | 0.00 | CARF |
| ATOM | 2121 | C1  | BGLC | 2 | 9.320  | -5.813 | -111.233 | 1.00 | 2.00 | CARF |
| ATOM | 2122 | H1  | BGLC | 2 | 9.989  | -4.966 | -111.137 | 1.00 | 0.00 | CARF |
| ATOM | 2123 | C5  | BGLC | 2 | 8.185  | -4.632 | -112.963 | 1.00 | 2.00 | CARF |
| ATOM | 2124 | H5  | BGLC | 2 | 8.911  | -3.801 | -112.851 | 1.00 | 0.00 | CARF |
| ATOM | 2125 | O5  | BGLC | 2 | 8.065  | -5.380 | -111.738 | 1.00 | 2.00 | CARF |
| ATOM | 2126 | C2  | BGLC | 2 | 9.942  | -6.815 | -112.217 | 1.00 | 2.00 | CARF |
| ATOM | 2127 | H2  | BGLC | 2 | 9.368  | -7.797 | -112.240 | 1.00 | 0.00 | CARF |
| ATOM | 2128 | O2  | BGLC | 2 | 11.237 | -7.101 | -111.684 | 1.00 | 2.00 | CARF |
| ATOM | 2129 | HO2 | BGLC | 2 | 11.504 | -8.015 | -111.671 | 1.00 | 0.00 | CARF |
| ATOM | 2130 | C3  | BGLC | 2 | 10.049 | -6.216 | -113.600 | 1.00 | 2.00 | CARF |
| ATOM | 2131 | H3  | BGLC | 2 | 10.772 | -5.402 | -113.557 | 1.00 | 0.00 | CARF |
| ATOM | 2132 | O3  | BGLC | 2 | 10.394 | -7.250 | -114.544 | 1.00 | 2.00 | CARF |
| ATOM | 2133 | HO3 | BGLC | 2 | 11.258 | -7.630 | -114.552 | 1.00 | 0.00 | CARF |
| ATOM | 2134 | C4  | BGLC | 2 | 8.763  | -5.523 | -114.018 | 1.00 | 2.00 | CARF |
| ATOM | 2135 | H4  | BGLC | 2 | 8.048  | -6.310 | -114.238 | 1.00 | 0.00 | CARF |
| ATOM | 2136 | O4  | BGLC | 2 | 8.827  | -4.868 | -115.247 | 1.00 | 2.00 | CARF |
| ATOM | 2137 | C6  | BGLC | 2 | 6.799  | -4.109 | -113.272 | 1.00 | 2.00 | CARF |
| ATOM | 2138 | H61 | BGLC | 2 | 6.277  | -5.015 | -113.742 | 1.00 | 0.00 | CARF |
| ATOM | 2139 | H62 | BGLC | 2 | 6.153  | -3.845 | -112.441 | 1.00 | 0.00 | CARF |
| ATOM | 2140 | O6  | BGLC | 2 | 6.854  | -3.163 | -114.324 | 1.00 | 2.00 | CARF |
| ATOM | 2141 | HO6 | BGLC | 2 | 7.438  | -2.416 | -114.239 | 1.00 | 0.00 | CARF |
| ATOM | 2142 | C1  | BGLC | 3 | 8.656  | -5.498 | -116.424 | 1.00 | 2.00 | CARF |
| ATOM | 2143 | H1  | BGLC | 3 | 7.986  | -6.344 | -116.325 | 1.00 | 0.00 | CARF |
| ATOM | 2144 | C5  | BGLC | 3 | 9.790  | -6.686 | -118.150 | 1.00 | 2.00 | CARF |
| ATOM | 2145 | H5  | BGLC | 3 | 9.063  | -7.516 | -118.036 | 1.00 | 0.00 | CARF |
| ATOM | 2146 | O5  | BGLC | 3 | 9.911  | -5.935 | -116.927 | 1.00 | 2.00 | CARF |
| ATOM | 2147 | C2  | BGLC | 3 | 8.035  | -4.501 | -117.410 | 1.00 | 2.00 | CARF |
| ATOM | 2148 | H2  | BGLC | 3 | 8.609  | -3.519 | -117.437 | 1.00 | 0.00 | CARF |
| ATOM | 2149 | O2  | BGLC | 3 | 6.740  | -4.212 | -116.877 | 1.00 | 2.00 | CARF |
| ATOM | 2150 | HO2 | BGLC | 3 | 6.474  | -3.297 | -116.867 | 1.00 | 0.00 | CARF |
| ATOM | 2151 | C3  | BGLC | 3 | 7.927  | -5.105 | -118.791 | 1.00 | 2.00 | CARF |
| ATOM | 2152 | H3  | BGLC | 3 | 7.204  | -5.918 | -118.742 | 1.00 | 0.00 | CARF |
| ATOM | 2153 | O3  | BGLC | 3 | 7.579  | -4.075 | -119.739 | 1.00 | 2.00 | CARF |
| ATOM | 2154 | HO3 | BGLC | 3 | 6.714  | -3.696 | -119.747 | 1.00 | 0.00 | CARF |
| ATOM | 2155 | C4  | BGLC | 3 | 9.211  | -5.801 | -119.207 | 1.00 | 2.00 | CARF |
| ATOM | 2156 | H4  | BGLC | 3 | 9.925  | -5.014 | -119.430 | 1.00 | 0.00 | CARF |
| ATOM | 2157 | O4  | BGLC | 3 | 9.146  | -6.458 | -120.434 | 1.00 | 2.00 | CARF |
| ATOM | 2158 | C6  | BGLC | 3 | 11.175 | -7.211 | -118.457 | 1.00 | 2.00 | CARF |



|      |      |     |      |   |        |                |      |      |      |
|------|------|-----|------|---|--------|----------------|------|------|------|
| ATOM | 2159 | H61 | BGLC | 3 | 11.697 | -6.307-118.931 | 1.00 | 0.00 | CARF |
| ATOM | 2160 | H62 | BGLC | 3 | 11.821 | -7.471-117.625 | 1.00 | 0.00 | CARF |
| ATOM | 2161 | O6  | BGLC | 3 | 11.120 | -8.163-119.505 | 1.00 | 2.00 | CARF |
| ATOM | 2162 | HO6 | BGLC | 3 | 10.536 | -8.910-119.417 | 1.00 | 0.00 | CARF |
| ATOM | 2163 | C1  | BGLC | 4 | 9.315  | -5.834-121.613 | 1.00 | 2.00 | CARF |
| ATOM | 2164 | H1  | BGLC | 4 | 9.985  | -4.988-121.518 | 1.00 | 0.00 | CARF |
| ATOM | 2165 | C5  | BGLC | 4 | 8.181  | -4.653-123.343 | 1.00 | 2.00 | CARF |
| ATOM | 2166 | H5  | BGLC | 4 | 8.907  | -3.822-123.232 | 1.00 | 0.00 | CARF |
| ATOM | 2167 | O5  | BGLC | 4 | 8.061  | -5.399-122.118 | 1.00 | 2.00 | CARF |
| ATOM | 2168 | C2  | BGLC | 4 | 9.937  | -6.836-122.597 | 1.00 | 2.00 | CARF |
| ATOM | 2169 | H2  | BGLC | 4 | 9.363  | -7.818-122.620 | 1.00 | 0.00 | CARF |
| ATOM | 2170 | O2  | BGLC | 4 | 11.232 | -7.123-122.064 | 1.00 | 2.00 | CARF |
| ATOM | 2171 | HO2 | BGLC | 4 | 11.498 | -8.038-122.051 | 1.00 | 0.00 | CARF |
| ATOM | 2172 | C3  | BGLC | 4 | 10.044 | -6.237-123.980 | 1.00 | 2.00 | CARF |
| ATOM | 2173 | H3  | BGLC | 4 | 10.767 | -5.423-123.936 | 1.00 | 0.00 | CARF |
| ATOM | 2174 | O3  | BGLC | 4 | 10.389 | -7.270-124.924 | 1.00 | 2.00 | CARF |
| ATOM | 2175 | HO3 | BGLC | 4 | 11.253 | -7.650-124.932 | 1.00 | 0.00 | CARF |
| ATOM | 2176 | C4  | BGLC | 4 | 8.760  | -5.544-124.398 | 1.00 | 2.00 | CARF |
| ATOM | 2177 | H4  | BGLC | 4 | 8.046  | -6.333-124.617 | 1.00 | 0.00 | CARF |
| ATOM | 2178 | O4  | BGLC | 4 | 8.822  | -4.890-125.627 | 1.00 | 2.00 | CARF |
| ATOM | 2179 | C6  | BGLC | 4 | 6.794  | -4.130-123.652 | 1.00 | 2.00 | CARF |
| ATOM | 2180 | H61 | BGLC | 4 | 6.272  | -5.036-124.123 | 1.00 | 0.00 | CARF |
| ATOM | 2181 | H62 | BGLC | 4 | 6.148  | -3.867-122.821 | 1.00 | 0.00 | CARF |
| ATOM | 2182 | O6  | BGLC | 4 | 6.850  | -3.183-124.704 | 1.00 | 2.00 | CARF |
| ATOM | 2183 | HO6 | BGLC | 4 | 7.434  | -2.436-124.618 | 1.00 | 0.00 | CARF |
| ATOM | 2184 | C1  | BGLC | 5 | 8.652  | -5.520-126.804 | 1.00 | 2.00 | CARF |
| ATOM | 2185 | H1  | BGLC | 5 | 7.983  | -6.367-126.705 | 1.00 | 0.00 | CARF |
| ATOM | 2186 | C5  | BGLC | 5 | 9.786  | -6.707-128.530 | 1.00 | 2.00 | CARF |
| ATOM | 2187 | H5  | BGLC | 5 | 9.059  | -7.537-128.416 | 1.00 | 0.00 | CARF |
| ATOM | 2188 | O5  | BGLC | 5 | 9.907  | -5.955-127.307 | 1.00 | 2.00 | CARF |
| ATOM | 2189 | C2  | BGLC | 5 | 8.031  | -4.522-127.790 | 1.00 | 2.00 | CARF |
| ATOM | 2190 | H2  | BGLC | 5 | 8.606  | -3.541-127.817 | 1.00 | 0.00 | CARF |
| ATOM | 2191 | O2  | BGLC | 5 | 6.735  | -4.232-127.257 | 1.00 | 2.00 | CARF |
| ATOM | 2192 | HO2 | BGLC | 5 | 6.469  | -3.317-127.247 | 1.00 | 0.00 | CARF |
| ATOM | 2193 | C3  | BGLC | 5 | 7.922  | -5.125-129.171 | 1.00 | 2.00 | CARF |
| ATOM | 2194 | H3  | BGLC | 5 | 7.199  | -5.938-129.123 | 1.00 | 0.00 | CARF |
| ATOM | 2195 | O3  | BGLC | 5 | 7.576  | -4.096-130.119 | 1.00 | 2.00 | CARF |
| ATOM | 2196 | HO3 | BGLC | 5 | 6.712  | -3.716-130.128 | 1.00 | 0.00 | CARF |
| ATOM | 2197 | C4  | BGLC | 5 | 9.207  | -5.821-129.587 | 1.00 | 2.00 | CARF |
| ATOM | 2198 | H4  | BGLC | 5 | 9.921  | -5.035-129.811 | 1.00 | 0.00 | CARF |
| ATOM | 2199 | O4  | BGLC | 5 | 9.141  | -6.480-130.814 | 1.00 | 2.00 | CARF |
| ATOM | 2200 | C6  | BGLC | 5 | 11.171 | -7.232-128.837 | 1.00 | 2.00 | CARF |
| ATOM | 2201 | O61 | BGLC | 5 | 11.190 | -8.647-128.881 | 1.00 | 0.00 | CARF |
| ATOM | 2202 | O62 | BGLC | 5 | 11.850 | -6.382-128.956 | 1.00 | 0.00 | CARF |
| ATOM | 2203 | C1  | BGLC | 6 | 9.312  | -5.854-131.993 | 1.00 | 2.00 | CARF |
| ATOM | 2204 | H1  | BGLC | 6 | 9.981  | -5.007-131.896 | 1.00 | 0.00 | CARF |
| ATOM | 2205 | C5  | BGLC | 6 | 8.175  | -4.675-133.723 | 1.00 | 2.00 | CARF |
| ATOM | 2206 | H5  | BGLC | 6 | 8.902  | -3.844-133.614 | 1.00 | 0.00 | CARF |
| ATOM | 2207 | O5  | BGLC | 6 | 8.057  | -5.421-132.498 | 1.00 | 2.00 | CARF |
| ATOM | 2208 | C2  | BGLC | 6 | 9.933  | -6.856-132.977 | 1.00 | 2.00 | CARF |
| ATOM | 2209 | H2  | BGLC | 6 | 9.358  | -7.837-133.000 | 1.00 | 0.00 | CARF |
| ATOM | 2210 | O2  | BGLC | 6 | 11.228 | -7.144-132.444 | 1.00 | 2.00 | CARF |
| ATOM | 2211 | HO2 | BGLC | 6 | 11.494 | -8.059-132.431 | 1.00 | 0.00 | CARF |
| ATOM | 2212 | C3  | BGLC | 6 | 10.040 | -6.257-134.360 | 1.00 | 2.00 | CARF |

|      |      |     |      |   |        |                |      |      |      |
|------|------|-----|------|---|--------|----------------|------|------|------|
| ATOM | 2213 | H3  | BGLC | 6 | 10.763 | -5.443-134.317 | 1.00 | 0.00 | CARF |
| ATOM | 2214 | O3  | BGLC | 6 | 10.385 | -7.292-135.304 | 1.00 | 2.00 | CARF |
| ATOM | 2215 | HO3 | BGLC | 6 | 11.249 | -7.672-135.312 | 1.00 | 0.00 | CARF |
| ATOM | 2216 | C4  | BGLC | 6 | 8.755  | -5.564-134.778 | 1.00 | 2.00 | CARF |
| ATOM | 2217 | H4  | BGLC | 6 | 8.043  | -6.353-134.997 | 1.00 | 0.00 | CARF |
| ATOM | 2218 | O4  | BGLC | 6 | 8.817  | -4.911-136.007 | 1.00 | 2.00 | CARF |
| ATOM | 2219 | C6  | BGLC | 6 | 6.790  | -4.150-134.032 | 1.00 | 2.00 | CARF |
| ATOM | 2220 | H61 | BGLC | 6 | 6.267  | -5.056-134.502 | 1.00 | 0.00 | CARF |
| ATOM | 2221 | H62 | BGLC | 6 | 6.144  | -3.886-133.201 | 1.00 | 0.00 | CARF |
| ATOM | 2222 | O6  | BGLC | 6 | 6.845  | -3.203-135.084 | 1.00 | 2.00 | CARF |
| ATOM | 2223 | HO6 | BGLC | 6 | 7.429  | -2.456-134.999 | 1.00 | 0.00 | CARF |
| ATOM | 2224 | C1  | BGLC | 7 | 8.647  | -5.540-137.184 | 1.00 | 2.00 | CARF |
| ATOM | 2225 | H1  | BGLC | 7 | 7.977  | -6.386-137.085 | 1.00 | 0.00 | CARF |
| ATOM | 2226 | C5  | BGLC | 7 | 9.781  | -6.728-138.910 | 1.00 | 2.00 | CARF |
| ATOM | 2227 | H5  | BGLC | 7 | 9.054  | -7.558-138.796 | 1.00 | 0.00 | CARF |
| ATOM | 2228 | O5  | BGLC | 7 | 9.902  | -5.976-137.687 | 1.00 | 2.00 | CARF |
| ATOM | 2229 | C2  | BGLC | 7 | 8.026  | -4.543-138.170 | 1.00 | 2.00 | CARF |
| ATOM | 2230 | H2  | BGLC | 7 | 8.601  | -3.562-138.197 | 1.00 | 0.00 | CARF |
| ATOM | 2231 | O2  | BGLC | 7 | 6.731  | -4.253-137.637 | 1.00 | 2.00 | CARF |
| ATOM | 2232 | HO2 | BGLC | 7 | 6.465  | -3.338-137.627 | 1.00 | 0.00 | CARF |
| ATOM | 2233 | C3  | BGLC | 7 | 7.917  | -5.146-139.551 | 1.00 | 2.00 | CARF |
| ATOM | 2234 | H3  | BGLC | 7 | 7.194  | -5.960-139.504 | 1.00 | 0.00 | CARF |
| ATOM | 2235 | O3  | BGLC | 7 | 7.571  | -4.116-140.499 | 1.00 | 2.00 | CARF |
| ATOM | 2236 | HO3 | BGLC | 7 | 6.707  | -3.736-140.507 | 1.00 | 0.00 | CARF |
| ATOM | 2237 | C4  | BGLC | 7 | 9.202  | -5.841-139.967 | 1.00 | 2.00 | CARF |
| ATOM | 2238 | H4  | BGLC | 7 | 9.916  | -5.054-140.189 | 1.00 | 0.00 | CARF |
| ATOM | 2239 | O4  | BGLC | 7 | 9.138  | -6.500-141.194 | 1.00 | 2.00 | CARF |
| ATOM | 2240 | C6  | BGLC | 7 | 11.167 | -7.253-139.217 | 1.00 | 2.00 | CARF |
| ATOM | 2241 | H61 | BGLC | 7 | 11.690 | -6.349-139.691 | 1.00 | 0.00 | CARF |
| ATOM | 2242 | H62 | BGLC | 7 | 11.813 | -7.513-138.385 | 1.00 | 0.00 | CARF |
| ATOM | 2243 | O6  | BGLC | 7 | 11.111 | -8.204-140.265 | 1.00 | 2.00 | CARF |
| ATOM | 2244 | HO6 | BGLC | 7 | 10.527 | -8.950-140.177 | 1.00 | 0.00 | CARF |
| ATOM | 2245 | C1  | BGLC | 8 | 9.307  | -5.875-142.373 | 1.00 | 2.00 | CARF |
| ATOM | 2246 | H1  | BGLC | 8 | 9.977  | -5.029-142.278 | 1.00 | 0.00 | CARF |
| ATOM | 2247 | C5  | BGLC | 8 | 8.171  | -4.695-144.103 | 1.00 | 2.00 | CARF |
| ATOM | 2248 | H5  | BGLC | 8 | 8.897  | -3.864-143.994 | 1.00 | 0.00 | CARF |
| ATOM | 2249 | O5  | BGLC | 8 | 8.053  | -5.440-142.878 | 1.00 | 2.00 | CARF |
| ATOM | 2250 | C2  | BGLC | 8 | 9.928  | -6.877-143.357 | 1.00 | 2.00 | CARF |
| ATOM | 2251 | H2  | BGLC | 8 | 9.354  | -7.859-143.380 | 1.00 | 0.00 | CARF |
| ATOM | 2252 | O2  | BGLC | 8 | 11.224 | -7.164-142.823 | 1.00 | 2.00 | CARF |
| ATOM | 2253 | HO2 | BGLC | 8 | 11.490 | -8.079-142.810 | 1.00 | 0.00 | CARF |
| ATOM | 2254 | C3  | BGLC | 8 | 10.035 | -6.278-144.740 | 1.00 | 2.00 | CARF |
| ATOM | 2255 | H3  | BGLC | 8 | 10.758 | -5.464-144.697 | 1.00 | 0.00 | CARF |
| ATOM | 2256 | O3  | BGLC | 8 | 10.380 | -7.312-145.684 | 1.00 | 2.00 | CARF |
| ATOM | 2257 | HO3 | BGLC | 8 | 11.244 | -7.692-145.692 | 1.00 | 0.00 | CARF |
| ATOM | 2258 | C4  | BGLC | 8 | 8.750  | -5.585-145.158 | 1.00 | 2.00 | CARF |
| ATOM | 2259 | H4  | BGLC | 8 | 8.036  | -6.373-145.377 | 1.00 | 0.00 | CARF |
| ATOM | 2260 | O4  | BGLC | 8 | 8.813  | -4.931-146.387 | 1.00 | 2.00 | CARF |
| ATOM | 2261 | C6  | BGLC | 8 | 6.785  | -4.172-144.412 | 1.00 | 2.00 | CARF |
| ATOM | 2262 | H61 | BGLC | 8 | 6.263  | -5.077-144.884 | 1.00 | 0.00 | CARF |
| ATOM | 2263 | H62 | BGLC | 8 | 6.138  | -3.910-143.581 | 1.00 | 0.00 | CARF |
| ATOM | 2264 | O6  | BGLC | 8 | 6.841  | -3.224-145.463 | 1.00 | 2.00 | CARF |
| ATOM | 2265 | HO6 | BGLC | 8 | 7.425  | -2.477-145.377 | 1.00 | 0.00 | CARF |
| ATOM | 2266 | C1  | BGLC | 9 | 8.644  | -5.561-147.564 | 1.00 | 2.00 | CARF |

|      |      |     |      |    |        |                |      |      |      |
|------|------|-----|------|----|--------|----------------|------|------|------|
| ATOM | 2267 | H1  | BGLC | 9  | 7.974  | -6.407-147.465 | 1.00 | 0.00 | CARF |
| ATOM | 2268 | C5  | BGLC | 9  | 9.776  | -6.749-149.290 | 1.00 | 2.00 | CARF |
| ATOM | 2269 | H5  | BGLC | 9  | 9.050  | -7.580-149.176 | 1.00 | 0.00 | CARF |
| ATOM | 2270 | O5  | BGLC | 9  | 9.897  | -5.998-148.067 | 1.00 | 2.00 | CARF |
| ATOM | 2271 | C2  | BGLC | 9  | 8.021  | -4.564-148.550 | 1.00 | 2.00 | CARF |
| ATOM | 2272 | H2  | BGLC | 9  | 8.596  | -3.583-148.576 | 1.00 | 0.00 | CARF |
| ATOM | 2273 | O2  | BGLC | 9  | 6.726  | -4.274-148.017 | 1.00 | 2.00 | CARF |
| ATOM | 2274 | HO2 | BGLC | 9  | 6.460  | -3.359-148.008 | 1.00 | 0.00 | CARF |
| ATOM | 2275 | C3  | BGLC | 9  | 7.913  | -5.167-149.931 | 1.00 | 2.00 | CARF |
| ATOM | 2276 | H3  | BGLC | 9  | 7.190  | -5.981-149.884 | 1.00 | 0.00 | CARF |
| ATOM | 2277 | O3  | BGLC | 9  | 7.567  | -4.137-150.879 | 1.00 | 2.00 | CARF |
| ATOM | 2278 | HO3 | BGLC | 9  | 6.703  | -3.757-150.888 | 1.00 | 0.00 | CARF |
| ATOM | 2279 | C4  | BGLC | 9  | 9.198  | -5.862-150.347 | 1.00 | 2.00 | CARF |
| ATOM | 2280 | H4  | BGLC | 9  | 9.913  | -5.076-150.570 | 1.00 | 0.00 | CARF |
| ATOM | 2281 | O4  | BGLC | 9  | 9.133  | -6.521-151.574 | 1.00 | 2.00 | CARF |
| ATOM | 2282 | C6  | BGLC | 9  | 11.163 | -7.273-149.597 | 1.00 | 2.00 | CARF |
| ATOM | 2283 | O61 | BGLC | 9  | 11.183 | -8.688-149.643 | 1.00 | 0.00 | CARF |
| ATOM | 2284 | O62 | BGLC | 9  | 11.842 | -6.423-149.715 | 1.00 | 0.00 | CARF |
| ATOM | 2285 | C1  | BGLC | 10 | 9.303  | -5.896-152.753 | 1.00 | 2.00 | CARF |
| ATOM | 2286 | H1  | BGLC | 10 | 9.973  | -5.049-152.657 | 1.00 | 0.00 | CARF |
| ATOM | 2287 | C5  | BGLC | 10 | 8.167  | -4.716-154.483 | 1.00 | 2.00 | CARF |
| ATOM | 2288 | H5  | BGLC | 10 | 8.893  | -3.885-154.373 | 1.00 | 0.00 | CARF |
| ATOM | 2289 | O5  | BGLC | 10 | 8.048  | -5.462-153.258 | 1.00 | 2.00 | CARF |
| ATOM | 2290 | C2  | BGLC | 10 | 9.924  | -6.898-153.736 | 1.00 | 2.00 | CARF |
| ATOM | 2291 | H2  | BGLC | 10 | 9.351  | -7.880-153.759 | 1.00 | 0.00 | CARF |
| ATOM | 2292 | O2  | BGLC | 10 | 11.219 | -7.184-153.203 | 1.00 | 2.00 | CARF |
| ATOM | 2293 | HO2 | BGLC | 10 | 11.486 | -8.099-153.189 | 1.00 | 0.00 | CARF |
| ATOM | 2294 | C3  | BGLC | 10 | 10.030 | -6.298-155.120 | 1.00 | 2.00 | CARF |
| ATOM | 2295 | H3  | BGLC | 10 | 10.753 | -5.484-155.077 | 1.00 | 0.00 | CARF |
| ATOM | 2296 | O3  | BGLC | 10 | 10.376 | -7.333-156.064 | 1.00 | 2.00 | CARF |
| ATOM | 2297 | HO3 | BGLC | 10 | 11.241 | -7.712-156.072 | 1.00 | 0.00 | CARF |
| ATOM | 2298 | C4  | BGLC | 10 | 8.745  | -5.606-155.538 | 1.00 | 2.00 | CARF |
| ATOM | 2299 | H4  | BGLC | 10 | 8.031  | -6.394-155.757 | 1.00 | 0.00 | CARF |
| ATOM | 2300 | O4  | BGLC | 10 | 8.808  | -4.952-156.767 | 1.00 | 2.00 | CARF |
| ATOM | 2301 | C6  | BGLC | 10 | 6.781  | -4.192-154.792 | 1.00 | 2.00 | CARF |
| ATOM | 2302 | H61 | BGLC | 10 | 6.259  | -5.098-155.263 | 1.00 | 0.00 | CARF |
| ATOM | 2303 | H62 | BGLC | 10 | 6.135  | -3.929-153.961 | 1.00 | 0.00 | CARF |
| ATOM | 2304 | O6  | BGLC | 10 | 6.836  | -3.244-155.843 | 1.00 | 2.00 | CARF |
| ATOM | 2305 | HO6 | BGLC | 10 | 7.420  | -2.497-155.757 | 1.00 | 0.00 | CARF |
| ATOM | 2306 | C1  | BGLC | 11 | 8.639  | -5.582-157.944 | 1.00 | 2.00 | CARF |
| ATOM | 2307 | H1  | BGLC | 11 | 7.969  | -6.428-157.845 | 1.00 | 0.00 | CARF |
| ATOM | 2308 | C5  | BGLC | 11 | 9.772  | -6.768-159.670 | 1.00 | 2.00 | CARF |
| ATOM | 2309 | H5  | BGLC | 11 | 9.044  | -7.598-159.557 | 1.00 | 0.00 | CARF |
| ATOM | 2310 | O5  | BGLC | 11 | 9.892  | -6.018-158.447 | 1.00 | 2.00 | CARF |
| ATOM | 2311 | C2  | BGLC | 11 | 8.018  | -4.584-158.930 | 1.00 | 2.00 | CARF |
| ATOM | 2312 | H2  | BGLC | 11 | 8.593  | -3.603-158.957 | 1.00 | 0.00 | CARF |
| ATOM | 2313 | O2  | BGLC | 11 | 6.722  | -4.294-158.397 | 1.00 | 2.00 | CARF |
| ATOM | 2314 | HO2 | BGLC | 11 | 6.456  | -3.379-158.387 | 1.00 | 0.00 | CARF |
| ATOM | 2315 | C3  | BGLC | 11 | 7.908  | -5.187-160.311 | 1.00 | 2.00 | CARF |
| ATOM | 2316 | H3  | BGLC | 11 | 7.184  | -6.000-160.263 | 1.00 | 0.00 | CARF |
| ATOM | 2317 | O3  | BGLC | 11 | 7.562  | -4.158-161.259 | 1.00 | 2.00 | CARF |
| ATOM | 2318 | HO3 | BGLC | 11 | 6.698  | -3.778-161.267 | 1.00 | 0.00 | CARF |
| ATOM | 2319 | C4  | BGLC | 11 | 9.193  | -5.884-160.727 | 1.00 | 2.00 | CARF |
| ATOM | 2320 | H4  | BGLC | 11 | 9.906  | -5.096-160.950 | 1.00 | 0.00 | CARF |

|      |      |     |      |    |        |                |      |      |      |
|------|------|-----|------|----|--------|----------------|------|------|------|
| ATOM | 2321 | O4  | BGLC | 11 | 9.129  | -6.542-161.954 | 1.00 | 2.00 | CARF |
| ATOM | 2322 | C6  | BGLC | 11 | 11.158 | -7.295-159.977 | 1.00 | 2.00 | CARF |
| ATOM | 2323 | H61 | BGLC | 11 | 11.682 | -6.391-160.450 | 1.00 | 0.00 | CARF |
| ATOM | 2324 | H62 | BGLC | 11 | 11.804 | -7.557-159.145 | 1.00 | 0.00 | CARF |
| ATOM | 2325 | O6  | BGLC | 11 | 11.102 | -8.245-161.025 | 1.00 | 2.00 | CARF |
| ATOM | 2326 | HO6 | BGLC | 11 | 10.517 | -8.991-160.937 | 1.00 | 0.00 | CARF |
| ATOM | 2327 | C1  | BGLC | 12 | 9.298  | -5.916-163.133 | 1.00 | 2.00 | CARF |
| ATOM | 2328 | H1  | BGLC | 12 | 9.967  | -5.069-163.037 | 1.00 | 0.00 | CARF |
| ATOM | 2329 | C5  | BGLC | 12 | 8.163  | -4.736-164.863 | 1.00 | 2.00 | CARF |
| ATOM | 2330 | H5  | BGLC | 12 | 8.890  | -3.905-164.753 | 1.00 | 0.00 | CARF |
| ATOM | 2331 | O5  | BGLC | 12 | 8.043  | -5.482-163.638 | 1.00 | 2.00 | CARF |
| ATOM | 2332 | C2  | BGLC | 12 | 9.919  | -6.918-164.116 | 1.00 | 2.00 | CARF |
| ATOM | 2333 | H2  | BGLC | 12 | 9.345  | -7.900-164.138 | 1.00 | 0.00 | CARF |
| ATOM | 2334 | O2  | BGLC | 12 | 11.214 | -7.205-163.583 | 1.00 | 2.00 | CARF |
| ATOM | 2335 | HO2 | BGLC | 12 | 11.480 | -8.120-163.569 | 1.00 | 0.00 | CARF |
| ATOM | 2336 | C3  | BGLC | 12 | 10.025 | -6.320-165.500 | 1.00 | 2.00 | CARF |
| ATOM | 2337 | H3  | BGLC | 12 | 10.748 | -5.507-165.455 | 1.00 | 0.00 | CARF |
| ATOM | 2338 | O3  | BGLC | 12 | 10.372 | -7.354-166.444 | 1.00 | 2.00 | CARF |
| ATOM | 2339 | HO3 | BGLC | 12 | 11.237 | -7.732-166.452 | 1.00 | 0.00 | CARF |
| ATOM | 2340 | C4  | BGLC | 12 | 8.741  | -5.626-165.918 | 1.00 | 2.00 | CARF |
| ATOM | 2341 | H4  | BGLC | 12 | 8.027  | -6.413-166.138 | 1.00 | 0.00 | CARF |
| ATOM | 2342 | O4  | BGLC | 12 | 8.805  | -4.972-167.147 | 1.00 | 2.00 | CARF |
| ATOM | 2343 | C6  | BGLC | 12 | 6.776  | -4.212-165.172 | 1.00 | 2.00 | CARF |
| ATOM | 2344 | H61 | BGLC | 12 | 6.253  | -5.117-165.643 | 1.00 | 0.00 | CARF |
| ATOM | 2345 | H62 | BGLC | 12 | 6.130  | -3.949-164.341 | 1.00 | 0.00 | CARF |
| ATOM | 2346 | O6  | BGLC | 12 | 6.832  | -3.265-166.223 | 1.00 | 2.00 | CARF |
| ATOM | 2347 | HO6 | BGLC | 12 | 7.416  | -2.518-166.137 | 1.00 | 0.00 | CARF |
| ATOM | 2348 | C1  | BGLC | 13 | 8.634  | -5.602-168.324 | 1.00 | 2.00 | CARF |
| ATOM | 2349 | H1  | BGLC | 13 | 7.964  | -6.448-168.225 | 1.00 | 0.00 | CARF |
| ATOM | 2350 | C5  | BGLC | 13 | 9.767  | -6.789-170.050 | 1.00 | 2.00 | CARF |
| ATOM | 2351 | H5  | BGLC | 13 | 9.040  | -7.619-169.937 | 1.00 | 0.00 | CARF |
| ATOM | 2352 | O5  | BGLC | 13 | 9.888  | -6.039-168.827 | 1.00 | 2.00 | CARF |
| ATOM | 2353 | C2  | BGLC | 13 | 8.013  | -4.605-169.310 | 1.00 | 2.00 | CARF |
| ATOM | 2354 | H2  | BGLC | 13 | 8.588  | -3.624-169.337 | 1.00 | 0.00 | CARF |
| ATOM | 2355 | O2  | BGLC | 13 | 6.718  | -4.315-168.777 | 1.00 | 2.00 | CARF |
| ATOM | 2356 | HO2 | BGLC | 13 | 6.452  | -3.400-168.767 | 1.00 | 0.00 | CARF |
| ATOM | 2357 | C3  | BGLC | 13 | 7.905  | -5.209-170.691 | 1.00 | 2.00 | CARF |
| ATOM | 2358 | H3  | BGLC | 13 | 7.182  | -6.022-170.643 | 1.00 | 0.00 | CARF |
| ATOM | 2359 | O3  | BGLC | 13 | 7.558  | -4.179-171.639 | 1.00 | 2.00 | CARF |
| ATOM | 2360 | HO3 | BGLC | 13 | 6.693  | -3.800-171.647 | 1.00 | 0.00 | CARF |
| ATOM | 2361 | C4  | BGLC | 13 | 9.188  | -5.904-171.107 | 1.00 | 2.00 | CARF |
| ATOM | 2362 | H4  | BGLC | 13 | 9.901  | -5.116-171.329 | 1.00 | 0.00 | CARF |
| ATOM | 2363 | O4  | BGLC | 13 | 9.125  | -6.562-172.334 | 1.00 | 2.00 | CARF |
| ATOM | 2364 | C6  | BGLC | 13 | 11.153 | -7.315-170.357 | 1.00 | 2.00 | CARF |
| ATOM | 2365 | O61 | BGLC | 13 | 11.172 | -8.731-170.400 | 1.00 | 0.00 | CARF |
| ATOM | 2366 | O62 | BGLC | 13 | 11.832 | -6.466-170.477 | 1.00 | 0.00 | CARF |
| ATOM | 2367 | C1  | BGLC | 14 | 9.293  | -5.937-173.513 | 1.00 | 2.00 | CARF |
| ATOM | 2368 | H1  | BGLC | 14 | 9.963  | -5.090-173.418 | 1.00 | 0.00 | CARF |
| ATOM | 2369 | C5  | BGLC | 14 | 8.158  | -4.757-175.243 | 1.00 | 2.00 | CARF |
| ATOM | 2370 | H5  | BGLC | 14 | 8.885  | -3.926-175.133 | 1.00 | 0.00 | CARF |
| ATOM | 2371 | O5  | BGLC | 14 | 8.039  | -5.503-174.017 | 1.00 | 2.00 | CARF |
| ATOM | 2372 | C2  | BGLC | 14 | 9.914  | -6.939-174.496 | 1.00 | 2.00 | CARF |
| ATOM | 2373 | H2  | BGLC | 14 | 9.340  | -7.921-174.519 | 1.00 | 0.00 | CARF |
| ATOM | 2374 | O2  | BGLC | 14 | 11.210 | -7.225-173.963 | 1.00 | 2.00 | CARF |

|      |      |     |      |    |        |                |      |      |      |
|------|------|-----|------|----|--------|----------------|------|------|------|
| ATOM | 2375 | HO2 | BGLC | 14 | 11.477 | -8.140-173.949 | 1.00 | 0.00 | CARF |
| ATOM | 2376 | C3  | BGLC | 14 | 10.022 | -6.341-175.880 | 1.00 | 2.00 | CARF |
| ATOM | 2377 | H3  | BGLC | 14 | 10.745 | -5.527-175.836 | 1.00 | 0.00 | CARF |
| ATOM | 2378 | O3  | BGLC | 14 | 10.367 | -7.374-176.824 | 1.00 | 2.00 | CARF |
| ATOM | 2379 | HO3 | BGLC | 14 | 11.231 | -7.754-176.832 | 1.00 | 0.00 | CARF |
| ATOM | 2380 | C4  | BGLC | 14 | 8.737  | -5.647-176.298 | 1.00 | 2.00 | CARF |
| ATOM | 2381 | H4  | BGLC | 14 | 8.024  | -6.436-176.517 | 1.00 | 0.00 | CARF |
| ATOM | 2382 | O4  | BGLC | 14 | 8.799  | -4.994-177.527 | 1.00 | 2.00 | CARF |
| ATOM | 2383 | C6  | BGLC | 14 | 6.772  | -4.233-175.551 | 1.00 | 2.00 | CARF |
| ATOM | 2384 | H61 | BGLC | 14 | 6.249  | -5.139-176.021 | 1.00 | 0.00 | CARF |
| ATOM | 2385 | H62 | BGLC | 14 | 6.126  | -3.969-174.719 | 1.00 | 0.00 | CARF |
| ATOM | 2386 | O6  | BGLC | 14 | 6.827  | -3.286-176.603 | 1.00 | 2.00 | CARF |
| ATOM | 2387 | HO6 | BGLC | 14 | 7.411  | -2.539-176.518 | 1.00 | 0.00 | CARF |
| ATOM | 2388 | C1  | BGLC | 15 | 8.630  | -5.623-178.704 | 1.00 | 2.00 | CARF |
| ATOM | 2389 | H1  | BGLC | 15 | 7.960  | -6.469-178.606 | 1.00 | 0.00 | CARF |
| ATOM | 2390 | C5  | BGLC | 15 | 9.764  | -6.811-180.430 | 1.00 | 2.00 | CARF |
| ATOM | 2391 | H5  | BGLC | 15 | 9.037  | -7.641-180.317 | 1.00 | 0.00 | CARF |
| ATOM | 2392 | O5  | BGLC | 15 | 9.884  | -6.060-179.207 | 1.00 | 2.00 | CARF |
| ATOM | 2393 | C2  | BGLC | 15 | 8.009  | -4.624-179.690 | 1.00 | 2.00 | CARF |
| ATOM | 2394 | H2  | BGLC | 15 | 8.582  | -3.642-179.719 | 1.00 | 0.00 | CARF |
| ATOM | 2395 | O2  | BGLC | 15 | 6.713  | -4.336-179.157 | 1.00 | 2.00 | CARF |
| ATOM | 2396 | HO2 | BGLC | 15 | 6.446  | -3.421-179.146 | 1.00 | 0.00 | CARF |
| ATOM | 2397 | C3  | BGLC | 15 | 7.900  | -5.230-181.071 | 1.00 | 2.00 | CARF |
| ATOM | 2398 | H3  | BGLC | 15 | 7.177  | -6.043-181.023 | 1.00 | 0.00 | CARF |
| ATOM | 2399 | O3  | BGLC | 15 | 7.554  | -4.200-182.019 | 1.00 | 2.00 | CARF |
| ATOM | 2400 | HO3 | BGLC | 15 | 6.690  | -3.820-182.027 | 1.00 | 0.00 | CARF |
| ATOM | 2401 | C4  | BGLC | 15 | 9.183  | -5.925-181.487 | 1.00 | 2.00 | CARF |
| ATOM | 2402 | H4  | BGLC | 15 | 9.895  | -5.137-181.710 | 1.00 | 0.00 | CARF |
| ATOM | 2403 | O4  | BGLC | 15 | 9.120  | -6.584-182.714 | 1.00 | 2.00 | CARF |
| ATOM | 2404 | C6  | BGLC | 15 | 11.148 | -7.336-180.737 | 1.00 | 2.00 | CARF |
| ATOM | 2405 | H61 | BGLC | 15 | 11.671 | -6.432-181.211 | 1.00 | 0.00 | CARF |
| ATOM | 2406 | H62 | BGLC | 15 | 11.794 | -7.596-179.905 | 1.00 | 0.00 | CARF |
| ATOM | 2407 | O6  | BGLC | 15 | 11.092 | -8.287-181.785 | 1.00 | 2.00 | CARF |
| ATOM | 2408 | HO6 | BGLC | 15 | 10.508 | -9.033-181.697 | 1.00 | 0.00 | CARF |
| ATOM | 2409 | C1  | BGLC | 16 | 9.289  | -5.957-183.893 | 1.00 | 2.00 | CARF |
| ATOM | 2410 | H1  | BGLC | 16 | 9.957  | -5.109-183.796 | 1.00 | 0.00 | CARF |
| ATOM | 2411 | C5  | BGLC | 16 | 8.153  | -4.777-185.623 | 1.00 | 2.00 | CARF |
| ATOM | 2412 | H5  | BGLC | 16 | 8.879  | -3.946-185.513 | 1.00 | 0.00 | CARF |
| ATOM | 2413 | O5  | BGLC | 16 | 8.035  | -5.525-184.397 | 1.00 | 2.00 | CARF |
| ATOM | 2414 | C2  | BGLC | 16 | 9.911  | -6.959-184.876 | 1.00 | 2.00 | CARF |
| ATOM | 2415 | H2  | BGLC | 16 | 9.336  | -7.940-184.897 | 1.00 | 0.00 | CARF |
| ATOM | 2416 | O2  | BGLC | 16 | 11.206 | -7.247-184.343 | 1.00 | 2.00 | CARF |
| ATOM | 2417 | HO2 | BGLC | 16 | 11.472 | -8.162-184.330 | 1.00 | 0.00 | CARF |
| ATOM | 2418 | C3  | BGLC | 16 | 10.018 | -6.362-186.260 | 1.00 | 2.00 | CARF |
| ATOM | 2419 | H3  | BGLC | 16 | 10.742 | -5.549-186.217 | 1.00 | 0.00 | CARF |
| ATOM | 2420 | O3  | BGLC | 16 | 10.363 | -7.396-187.204 | 1.00 | 2.00 | CARF |
| ATOM | 2421 | HO3 | BGLC | 16 | 11.227 | -7.776-187.212 | 1.00 | 0.00 | CARF |
| ATOM | 2422 | C4  | BGLC | 16 | 8.732  | -5.667-186.677 | 1.00 | 2.00 | CARF |
| ATOM | 2423 | H4  | BGLC | 16 | 8.019  | -6.456-186.896 | 1.00 | 0.00 | CARF |
| ATOM | 2424 | O4  | BGLC | 16 | 8.795  | -5.015-187.907 | 1.00 | 2.00 | CARF |
| ATOM | 2425 | C6  | BGLC | 16 | 6.768  | -4.254-185.931 | 1.00 | 2.00 | CARF |
| ATOM | 2426 | H61 | BGLC | 16 | 6.245  | -5.160-186.401 | 1.00 | 0.00 | CARF |
| ATOM | 2427 | H62 | BGLC | 16 | 6.122  | -3.991-185.099 | 1.00 | 0.00 | CARF |
| ATOM | 2428 | O6  | BGLC | 16 | 6.823  | -3.307-186.983 | 1.00 | 2.00 | CARF |

|      |      |     |      |    |        |                |      |      |      |
|------|------|-----|------|----|--------|----------------|------|------|------|
| ATOM | 2429 | HO6 | BGLC | 16 | 7.407  | -2.560-186.898 | 1.00 | 0.00 | CARF |
| ATOM | 2430 | C1  | BGLC | 17 | 8.626  | -5.643-189.084 | 1.00 | 2.00 | CARF |
| ATOM | 2431 | H1  | BGLC | 17 | 7.955  | -6.489-188.987 | 1.00 | 0.00 | CARF |
| ATOM | 2432 | C5  | BGLC | 17 | 9.759  | -6.831-190.810 | 1.00 | 2.00 | CARF |
| ATOM | 2433 | H5  | BGLC | 17 | 9.032  | -7.661-190.696 | 1.00 | 0.00 | CARF |
| ATOM | 2434 | O5  | BGLC | 17 | 9.880  | -6.080-189.587 | 1.00 | 2.00 | CARF |
| ATOM | 2435 | C2  | BGLC | 17 | 8.004  | -4.646-190.070 | 1.00 | 2.00 | CARF |
| ATOM | 2436 | H2  | BGLC | 17 | 8.579  | -3.665-190.097 | 1.00 | 0.00 | CARF |
| ATOM | 2437 | O2  | BGLC | 17 | 6.708  | -4.356-189.537 | 1.00 | 2.00 | CARF |
| ATOM | 2438 | HO2 | BGLC | 17 | 6.442  | -3.441-189.528 | 1.00 | 0.00 | CARF |
| ATOM | 2439 | C3  | BGLC | 17 | 7.896  | -5.250-191.451 | 1.00 | 2.00 | CARF |
| ATOM | 2440 | H3  | BGLC | 17 | 7.173  | -6.064-191.403 | 1.00 | 0.00 | CARF |
| ATOM | 2441 | O3  | BGLC | 17 | 7.549  | -4.220-192.399 | 1.00 | 2.00 | CARF |
| ATOM | 2442 | HO3 | BGLC | 17 | 6.684  | -3.841-192.407 | 1.00 | 0.00 | CARF |
| ATOM | 2443 | C4  | BGLC | 17 | 9.180  | -5.945-191.867 | 1.00 | 2.00 | CARF |
| ATOM | 2444 | H4  | BGLC | 17 | 9.894  | -5.158-192.090 | 1.00 | 0.00 | CARF |
| ATOM | 2445 | O4  | BGLC | 17 | 9.116  | -6.604-193.094 | 1.00 | 2.00 | CARF |
| ATOM | 2446 | C6  | BGLC | 17 | 11.145 | -7.356-191.117 | 1.00 | 2.00 | CARF |
| ATOM | 2447 | H61 | BGLC | 17 | 11.668 | -6.452-191.591 | 1.00 | 0.00 | CARF |
| ATOM | 2448 | H62 | BGLC | 17 | 11.791 | -7.616-190.285 | 1.00 | 0.00 | CARF |
| ATOM | 2449 | O6  | BGLC | 17 | 11.089 | -8.307-192.165 | 1.00 | 2.00 | CARF |
| ATOM | 2450 | HO6 | BGLC | 17 | 10.505 | -9.053-192.077 | 1.00 | 0.00 | CARF |
| ATOM | 2451 | C1  | BGLC | 18 | 9.285  | -5.979-194.273 | 1.00 | 2.00 | CARF |
| ATOM | 2452 | H1  | BGLC | 18 | 9.955  | -5.133-194.178 | 1.00 | 0.00 | CARF |
| ATOM | 2453 | C5  | BGLC | 18 | 8.149  | -4.799-196.003 | 1.00 | 2.00 | CARF |
| ATOM | 2454 | H5  | BGLC | 18 | 8.876  | -3.969-195.895 | 1.00 | 0.00 | CARF |
| ATOM | 2455 | O5  | BGLC | 18 | 8.031  | -5.544-194.777 | 1.00 | 2.00 | CARF |
| ATOM | 2456 | C2  | BGLC | 18 | 9.907  | -6.981-195.256 | 1.00 | 2.00 | CARF |
| ATOM | 2457 | H2  | BGLC | 18 | 9.334  | -7.963-195.278 | 1.00 | 0.00 | CARF |
| ATOM | 2458 | O2  | BGLC | 18 | 11.201 | -7.267-194.723 | 1.00 | 2.00 | CARF |
| ATOM | 2459 | HO2 | BGLC | 18 | 11.468 | -8.182-194.709 | 1.00 | 0.00 | CARF |
| ATOM | 2460 | C3  | BGLC | 18 | 10.013 | -6.382-196.640 | 1.00 | 2.00 | CARF |
| ATOM | 2461 | H3  | BGLC | 18 | 10.737 | -5.569-196.596 | 1.00 | 0.00 | CARF |
| ATOM | 2462 | O3  | BGLC | 18 | 10.358 | -7.416-197.584 | 1.00 | 2.00 | CARF |
| ATOM | 2463 | HO3 | BGLC | 18 | 11.222 | -7.796-197.592 | 1.00 | 0.00 | CARF |
| ATOM | 2464 | C4  | BGLC | 18 | 8.729  | -5.688-197.057 | 1.00 | 2.00 | CARF |
| ATOM | 2465 | H4  | BGLC | 18 | 8.017  | -6.478-197.276 | 1.00 | 0.00 | CARF |
| ATOM | 2466 | O4  | BGLC | 18 | 8.791  | -5.035-198.287 | 1.00 | 2.00 | CARF |
| ATOM | 2467 | C6  | BGLC | 18 | 6.763  | -4.274-196.311 | 1.00 | 2.00 | CARF |
| ATOM | 2468 | H61 | BGLC | 18 | 6.239  | -5.179-196.781 | 1.00 | 0.00 | CARF |
| ATOM | 2469 | H62 | BGLC | 18 | 6.118  | -4.010-195.479 | 1.00 | 0.00 | CARF |
| ATOM | 2470 | O6  | BGLC | 18 | 6.819  | -3.328-197.363 | 1.00 | 2.00 | CARF |
| ATOM | 2471 | HO6 | BGLC | 18 | 7.404  | -2.582-197.278 | 1.00 | 0.00 | CARF |
| ATOM | 2472 | C1  | BGLC | 19 | 8.621  | -5.664-199.463 | 1.00 | 2.00 | CARF |
| ATOM | 2473 | H1  | BGLC | 19 | 7.950  | -6.510-199.364 | 1.00 | 0.00 | CARF |
| ATOM | 2474 | C5  | BGLC | 19 | 9.754  | -6.852-201.190 | 1.00 | 2.00 | CARF |
| ATOM | 2475 | H5  | BGLC | 19 | 9.027  | -7.682-201.077 | 1.00 | 0.00 | CARF |
| ATOM | 2476 | O5  | BGLC | 19 | 9.875  | -6.102-199.967 | 1.00 | 2.00 | CARF |
| ATOM | 2477 | C2  | BGLC | 19 | 7.999  | -4.667-200.450 | 1.00 | 2.00 | CARF |
| ATOM | 2478 | H2  | BGLC | 19 | 8.573  | -3.686-200.476 | 1.00 | 0.00 | CARF |
| ATOM | 2479 | O2  | BGLC | 19 | 6.704  | -4.378-199.917 | 1.00 | 2.00 | CARF |
| ATOM | 2480 | HO2 | BGLC | 19 | 6.438  | -3.463-199.907 | 1.00 | 0.00 | CARF |
| ATOM | 2481 | C3  | BGLC | 19 | 7.891  | -5.270-201.831 | 1.00 | 2.00 | CARF |
| ATOM | 2482 | H3  | BGLC | 19 | 7.167  | -6.083-201.782 | 1.00 | 0.00 | CARF |

|      |      |     |      |    |         |                |      |      |      |
|------|------|-----|------|----|---------|----------------|------|------|------|
| ATOM | 2483 | O3  | BGLC | 19 | 7.544   | -4.241-202.779 | 1.00 | 2.00 | CARF |
| ATOM | 2484 | HO3 | BGLC | 19 | 6.679   | -3.862-202.788 | 1.00 | 0.00 | CARF |
| ATOM | 2485 | C4  | BGLC | 19 | 9.175   | -5.967-202.247 | 1.00 | 2.00 | CARF |
| ATOM | 2486 | H4  | BGLC | 19 | 9.888   | -5.180-202.470 | 1.00 | 0.00 | CARF |
| ATOM | 2487 | O4  | BGLC | 19 | 9.111   | -6.625-203.474 | 1.00 | 2.00 | CARF |
| ATOM | 2488 | C6  | BGLC | 19 | 11.140  | -7.377-201.497 | 1.00 | 2.00 | CARF |
| ATOM | 2489 | H61 | BGLC | 19 | 11.663  | -6.473-201.971 | 1.00 | 0.00 | CARF |
| ATOM | 2490 | H62 | BGLC | 19 | 11.786  | -7.637-200.665 | 1.00 | 0.00 | CARF |
| ATOM | 2491 | O6  | BGLC | 19 | 11.085  | -8.328-202.545 | 1.00 | 2.00 | CARF |
| ATOM | 2492 | HO6 | BGLC | 19 | 10.501  | -9.075-202.457 | 1.00 | 0.00 | CARF |
| ATOM | 2493 | C1  | BGLC | 20 | 9.280   | -5.999-204.653 | 1.00 | 2.00 | CARF |
| ATOM | 2494 | H1  | BGLC | 20 | 9.949   | -5.152-204.557 | 1.00 | 0.00 | CARF |
| ATOM | 2495 | C5  | BGLC | 20 | 8.144   | -4.820-206.383 | 1.00 | 2.00 | CARF |
| ATOM | 2496 | H5  | BGLC | 20 | 8.871   | -3.989-206.274 | 1.00 | 0.00 | CARF |
| ATOM | 2497 | O5  | BGLC | 20 | 8.026   | -5.565-205.157 | 1.00 | 2.00 | CARF |
| ATOM | 2498 | C2  | BGLC | 20 | 9.901   | -7.002-205.636 | 1.00 | 2.00 | CARF |
| ATOM | 2499 | H2  | BGLC | 20 | 9.328   | -7.984-205.659 | 1.00 | 0.00 | CARF |
| ATOM | 2500 | O2  | BGLC | 20 | 11.197  | -7.288-205.103 | 1.00 | 2.00 | CARF |
| ATOM | 2501 | HO2 | BGLC | 20 | 11.464  | -8.203-205.089 | 1.00 | 0.00 | CARF |
| ATOM | 2502 | C3  | BGLC | 20 | 10.008  | -6.402-207.020 | 1.00 | 2.00 | CARF |
| ATOM | 2503 | H3  | BGLC | 20 | 10.731  | -5.588-206.977 | 1.00 | 0.00 | CARF |
| ATOM | 2504 | O3  | BGLC | 20 | 10.354  | -7.437-207.964 | 1.00 | 2.00 | CARF |
| ATOM | 2505 | HO3 | BGLC | 20 | 11.218  | -7.817-207.971 | 1.00 | 0.00 | CARF |
| ATOM | 2506 | C4  | BGLC | 20 | 8.723   | -5.709-207.437 | 1.00 | 2.00 | CARF |
| ATOM | 2507 | H4  | BGLC | 20 | 7.973   | -6.438-207.727 | 1.00 | 0.00 | CARF |
| ATOM | 2508 | O4  | BGLC | 20 | 8.894   | -4.964-208.658 | 1.00 | 2.00 | CARF |
| ATOM | 2509 | HO4 | BGLC | 20 | 9.357   | -5.531-209.326 | 1.00 | 0.00 | CARF |
| ATOM | 2510 | C6  | BGLC | 20 | 6.759   | -4.296-206.691 | 1.00 | 2.00 | CARF |
| ATOM | 2511 | H61 | BGLC | 20 | 6.236   | -5.201-207.162 | 1.00 | 0.00 | CARF |
| ATOM | 2512 | H62 | BGLC | 20 | 6.113   | -4.033-205.859 | 1.00 | 0.00 | CARF |
| ATOM | 2513 | O6  | BGLC | 20 | 6.814   | -3.348-207.743 | 1.00 | 2.00 | CARF |
| ATOM | 2514 | HO6 | BGLC | 20 | 7.398   | -2.601-207.658 | 1.00 | 0.00 | CARF |
| ATOM | 2515 | C1  | BGLC | 1  | -9.251  | 0.658-106.048  | 1.00 | 2.00 | CARG |
| ATOM | 2516 | H1  | BGLC | 1  | -10.010 | -0.104-105.916 | 1.00 | 0.00 | CARG |
| ATOM | 2517 | O1  | BGLC | 1  | -8.975  | 1.380-104.863  | 1.00 | 2.00 | CARG |
| ATOM | 2518 | HO1 | BGLC | 1  | -8.589  | 2.187-105.128  | 1.00 | 0.00 | CARG |
| ATOM | 2519 | C5  | BGLC | 1  | -8.118  | -0.530-107.774 | 1.00 | 2.00 | CARG |
| ATOM | 2520 | H5  | BGLC | 1  | -8.844  | -1.361-107.660 | 1.00 | 0.00 | CARG |
| ATOM | 2521 | O5  | BGLC | 1  | -7.999  | 0.222-106.552  | 1.00 | 2.00 | CARG |
| ATOM | 2522 | C2  | BGLC | 1  | -9.874  | 1.656-107.035  | 1.00 | 2.00 | CARG |
| ATOM | 2523 | H2  | BGLC | 1  | -9.298  | 2.637-107.060  | 1.00 | 0.00 | CARG |
| ATOM | 2524 | O2  | BGLC | 1  | -11.169 | 1.947-106.502  | 1.00 | 2.00 | CARG |
| ATOM | 2525 | HO2 | BGLC | 1  | -11.434 | 2.862-106.493  | 1.00 | 0.00 | CARG |
| ATOM | 2526 | C3  | BGLC | 1  | -9.982  | 1.054-108.416  | 1.00 | 2.00 | CARG |
| ATOM | 2527 | H3  | BGLC | 1  | -10.706 | 0.241-108.366  | 1.00 | 0.00 | CARG |
| ATOM | 2528 | O3  | BGLC | 1  | -10.329 | 2.082-109.364  | 1.00 | 2.00 | CARG |
| ATOM | 2529 | HO3 | BGLC | 1  | -11.194 | 2.461-109.373  | 1.00 | 0.00 | CARG |
| ATOM | 2530 | C4  | BGLC | 1  | -8.697  | 0.356-108.832  | 1.00 | 2.00 | CARG |
| ATOM | 2531 | H4  | BGLC | 1  | -7.983  | 1.143-109.055  | 1.00 | 0.00 | CARG |
| ATOM | 2532 | O4  | BGLC | 1  | -8.762  | -0.302-110.059 | 1.00 | 2.00 | CARG |
| ATOM | 2533 | C6  | BGLC | 1  | -6.733  | -1.054-108.082 | 1.00 | 2.00 | CARG |
| ATOM | 2534 | H61 | BGLC | 1  | -6.211  | -0.150-108.557 | 1.00 | 0.00 | CARG |
| ATOM | 2535 | H62 | BGLC | 1  | -6.086  | -1.314-107.250 | 1.00 | 0.00 | CARG |
| ATOM | 2536 | O6  | BGLC | 1  | -6.789  | -2.005-109.130 | 1.00 | 2.00 | CARG |

|      |      |     |      |   |         |                |      |      |      |
|------|------|-----|------|---|---------|----------------|------|------|------|
| ATOM | 2537 | HO6 | BGLC | 1 | -7.373  | -2.752-109.041 | 1.00 | 0.00 | CARG |
| ATOM | 2538 | C1  | BGLC | 2 | -8.593  | 0.323-111.238  | 1.00 | 2.00 | CARG |
| ATOM | 2539 | H1  | BGLC | 2 | -7.923  | 1.169-111.143  | 1.00 | 0.00 | CARG |
| ATOM | 2540 | C5  | BGLC | 2 | -9.729  | 1.504-112.968  | 1.00 | 2.00 | CARG |
| ATOM | 2541 | H5  | BGLC | 2 | -9.003  | 2.335-112.859  | 1.00 | 0.00 | CARG |
| ATOM | 2542 | O5  | BGLC | 2 | -9.847  | 0.758-111.742  | 1.00 | 2.00 | CARG |
| ATOM | 2543 | C2  | BGLC | 2 | -7.972  | -0.677-112.221 | 1.00 | 2.00 | CARG |
| ATOM | 2544 | H2  | BGLC | 2 | -8.547  | -1.658-112.242 | 1.00 | 0.00 | CARG |
| ATOM | 2545 | O2  | BGLC | 2 | -6.676  | -0.964-111.688 | 1.00 | 2.00 | CARG |
| ATOM | 2546 | HO2 | BGLC | 2 | -6.409  | -1.879-111.675 | 1.00 | 0.00 | CARG |
| ATOM | 2547 | C3  | BGLC | 2 | -7.864  | -0.081-113.604 | 1.00 | 2.00 | CARG |
| ATOM | 2548 | H3  | BGLC | 2 | -7.141  | 0.733-113.560  | 1.00 | 0.00 | CARG |
| ATOM | 2549 | O3  | BGLC | 2 | -7.519  | -1.113-114.548 | 1.00 | 2.00 | CARG |
| ATOM | 2550 | HO3 | BGLC | 2 | -6.655  | -1.493-114.556 | 1.00 | 0.00 | CARG |
| ATOM | 2551 | C4  | BGLC | 2 | -9.151  | 0.614-114.022  | 1.00 | 2.00 | CARG |
| ATOM | 2552 | H4  | BGLC | 2 | -9.865  | -0.174-114.242 | 1.00 | 0.00 | CARG |
| ATOM | 2553 | O4  | BGLC | 2 | -9.087  | 1.268-115.252  | 1.00 | 2.00 | CARG |
| ATOM | 2554 | C6  | BGLC | 2 | -11.114 | 2.027-113.276  | 1.00 | 2.00 | CARG |
| ATOM | 2555 | H61 | BGLC | 2 | -11.637 | 1.122-113.747  | 1.00 | 0.00 | CARG |
| ATOM | 2556 | H62 | BGLC | 2 | -11.760 | 2.290-112.444  | 1.00 | 0.00 | CARG |
| ATOM | 2557 | O6  | BGLC | 2 | -11.058 | 2.975-114.328  | 1.00 | 2.00 | CARG |
| ATOM | 2558 | HO6 | BGLC | 2 | -10.474 | 3.722-114.242  | 1.00 | 0.00 | CARG |
| ATOM | 2559 | C1  | BGLC | 3 | -9.256  | 0.638-116.428  | 1.00 | 2.00 | CARG |
| ATOM | 2560 | H1  | BGLC | 3 | -9.925  | -0.209-116.329 | 1.00 | 0.00 | CARG |
| ATOM | 2561 | C5  | BGLC | 3 | -8.123  | -0.550-118.154 | 1.00 | 2.00 | CARG |
| ATOM | 2562 | H5  | BGLC | 3 | -8.849  | -1.381-118.039 | 1.00 | 0.00 | CARG |
| ATOM | 2563 | O5  | BGLC | 3 | -8.002  | 0.202-116.932  | 1.00 | 2.00 | CARG |
| ATOM | 2564 | C2  | BGLC | 3 | -9.879  | 1.636-117.415  | 1.00 | 2.00 | CARG |
| ATOM | 2565 | H2  | BGLC | 3 | -9.305  | 2.618-117.442  | 1.00 | 0.00 | CARG |
| ATOM | 2566 | O2  | BGLC | 3 | -11.173 | 1.925-116.882  | 1.00 | 2.00 | CARG |
| ATOM | 2567 | HO2 | BGLC | 3 | -11.439 | 2.840-116.872  | 1.00 | 0.00 | CARG |
| ATOM | 2568 | C3  | BGLC | 3 | -9.986  | 1.032-118.796  | 1.00 | 2.00 | CARG |
| ATOM | 2569 | H3  | BGLC | 3 | -10.709 | 0.218-118.748  | 1.00 | 0.00 | CARG |
| ATOM | 2570 | O3  | BGLC | 3 | -10.333 | 2.061-119.744  | 1.00 | 2.00 | CARG |
| ATOM | 2571 | HO3 | BGLC | 3 | -11.198 | 2.440-119.753  | 1.00 | 0.00 | CARG |
| ATOM | 2572 | C4  | BGLC | 3 | -8.702  | 0.337-119.212  | 1.00 | 2.00 | CARG |
| ATOM | 2573 | H4  | BGLC | 3 | -7.988  | 1.124-119.435  | 1.00 | 0.00 | CARG |
| ATOM | 2574 | O4  | BGLC | 3 | -8.766  | -0.323-120.439 | 1.00 | 2.00 | CARG |
| ATOM | 2575 | C6  | BGLC | 3 | -6.738  | -1.074-118.462 | 1.00 | 2.00 | CARG |
| ATOM | 2576 | H61 | BGLC | 3 | -6.217  | -0.170-118.938 | 1.00 | 0.00 | CARG |
| ATOM | 2577 | H62 | BGLC | 3 | -6.091  | -1.333-117.630 | 1.00 | 0.00 | CARG |
| ATOM | 2578 | O6  | BGLC | 3 | -6.794  | -2.027-119.510 | 1.00 | 2.00 | CARG |
| ATOM | 2579 | HO6 | BGLC | 3 | -7.377  | -2.774-119.420 | 1.00 | 0.00 | CARG |
| ATOM | 2580 | C1  | BGLC | 4 | -8.598  | 0.303-121.618  | 1.00 | 2.00 | CARG |
| ATOM | 2581 | H1  | BGLC | 4 | -7.929  | 1.150-121.523  | 1.00 | 0.00 | CARG |
| ATOM | 2582 | C5  | BGLC | 4 | -9.733  | 1.484-123.348  | 1.00 | 2.00 | CARG |
| ATOM | 2583 | H5  | BGLC | 4 | -9.007  | 2.315-123.238  | 1.00 | 0.00 | CARG |
| ATOM | 2584 | O5  | BGLC | 4 | -9.851  | 0.737-122.122  | 1.00 | 2.00 | CARG |
| ATOM | 2585 | C2  | BGLC | 4 | -7.975  | -0.699-122.601 | 1.00 | 2.00 | CARG |
| ATOM | 2586 | H2  | BGLC | 4 | -8.549  | -1.681-122.623 | 1.00 | 0.00 | CARG |
| ATOM | 2587 | O2  | BGLC | 4 | -6.680  | -0.985-122.068 | 1.00 | 2.00 | CARG |
| ATOM | 2588 | HO2 | BGLC | 4 | -6.413  | -1.899-122.055 | 1.00 | 0.00 | CARG |
| ATOM | 2589 | C3  | BGLC | 4 | -7.869  | -0.101-123.984 | 1.00 | 2.00 | CARG |
| ATOM | 2590 | H3  | BGLC | 4 | -7.145  | 0.712-123.939  | 1.00 | 0.00 | CARG |



|      |      |     |      |   |         |                |      |      |      |
|------|------|-----|------|---|---------|----------------|------|------|------|
| ATOM | 2591 | O3  | BGLC | 4 | -7.524  | -1.133-124.928 | 1.00 | 2.00 | CARG |
| ATOM | 2592 | HO3 | BGLC | 4 | -6.659  | -1.512-124.937 | 1.00 | 0.00 | CARG |
| ATOM | 2593 | C4  | BGLC | 4 | -9.154  | 0.594-124.402  | 1.00 | 2.00 | CARG |
| ATOM | 2594 | H4  | BGLC | 4 | -9.867  | -0.195-124.621 | 1.00 | 0.00 | CARG |
| ATOM | 2595 | O4  | BGLC | 4 | -9.091  | 1.247-125.632  | 1.00 | 2.00 | CARG |
| ATOM | 2596 | C6  | BGLC | 4 | -11.119 | 2.007-123.656  | 1.00 | 2.00 | CARG |
| ATOM | 2597 | H61 | BGLC | 4 | -11.642 | 1.102-124.127  | 1.00 | 0.00 | CARG |
| ATOM | 2598 | H62 | BGLC | 4 | -11.765 | 2.270-122.824  | 1.00 | 0.00 | CARG |
| ATOM | 2599 | O6  | BGLC | 4 | -11.063 | 2.954-124.708  | 1.00 | 2.00 | CARG |
| ATOM | 2600 | HO6 | BGLC | 4 | -10.479 | 3.701-124.623  | 1.00 | 0.00 | CARG |
| ATOM | 2601 | C1  | BGLC | 5 | -9.261  | 0.617-126.808  | 1.00 | 2.00 | CARG |
| ATOM | 2602 | H1  | BGLC | 5 | -9.930  | -0.229-126.708 | 1.00 | 0.00 | CARG |
| ATOM | 2603 | C5  | BGLC | 5 | -8.127  | -0.571-128.534 | 1.00 | 2.00 | CARG |
| ATOM | 2604 | H5  | BGLC | 5 | -8.853  | -1.402-128.419 | 1.00 | 0.00 | CARG |
| ATOM | 2605 | O5  | BGLC | 5 | -8.007  | 0.181-127.312  | 1.00 | 2.00 | CARG |
| ATOM | 2606 | C2  | BGLC | 5 | -9.883  | 1.615-127.795  | 1.00 | 2.00 | CARG |
| ATOM | 2607 | H2  | BGLC | 5 | -9.308  | 2.596-127.822  | 1.00 | 0.00 | CARG |
| ATOM | 2608 | O2  | BGLC | 5 | -11.178 | 1.905-127.262  | 1.00 | 2.00 | CARG |
| ATOM | 2609 | HO2 | BGLC | 5 | -11.444 | 2.820-127.252  | 1.00 | 0.00 | CARG |
| ATOM | 2610 | C3  | BGLC | 5 | -9.991  | 1.011-129.176  | 1.00 | 2.00 | CARG |
| ATOM | 2611 | H3  | BGLC | 5 | -10.714 | 0.198-129.128  | 1.00 | 0.00 | CARG |
| ATOM | 2612 | O3  | BGLC | 5 | -10.337 | 2.040-130.124  | 1.00 | 2.00 | CARG |
| ATOM | 2613 | HO3 | BGLC | 5 | -11.201 | 2.419-130.133  | 1.00 | 0.00 | CARG |
| ATOM | 2614 | C4  | BGLC | 5 | -8.707  | 0.315-129.592  | 1.00 | 2.00 | CARG |
| ATOM | 2615 | H4  | BGLC | 5 | -7.994  | 1.102-129.815  | 1.00 | 0.00 | CARG |
| ATOM | 2616 | O4  | BGLC | 5 | -8.771  | -0.344-130.818 | 1.00 | 2.00 | CARG |
| ATOM | 2617 | C6  | BGLC | 5 | -6.742  | -1.095-128.842 | 1.00 | 2.00 | CARG |
| ATOM | 2618 | H61 | BGLC | 5 | -6.221  | -0.191-129.317 | 1.00 | 0.00 | CARG |
| ATOM | 2619 | H62 | BGLC | 5 | -6.095  | -1.355-128.010 | 1.00 | 0.00 | CARG |
| ATOM | 2620 | O6  | BGLC | 5 | -6.797  | -2.047-129.890 | 1.00 | 2.00 | CARG |
| ATOM | 2621 | HO6 | BGLC | 5 | -7.380  | -2.794-129.801 | 1.00 | 0.00 | CARG |
| ATOM | 2622 | C1  | BGLC | 6 | -8.603  | 0.282-131.998  | 1.00 | 2.00 | CARG |
| ATOM | 2623 | H1  | BGLC | 6 | -7.934  | 1.129-131.903  | 1.00 | 0.00 | CARG |
| ATOM | 2624 | C5  | BGLC | 6 | -9.738  | 1.463-133.728  | 1.00 | 2.00 | CARG |
| ATOM | 2625 | H5  | BGLC | 6 | -9.012  | 2.294-133.618  | 1.00 | 0.00 | CARG |
| ATOM | 2626 | O5  | BGLC | 6 | -9.856  | 0.716-132.502  | 1.00 | 2.00 | CARG |
| ATOM | 2627 | C2  | BGLC | 6 | -7.980  | -0.719-132.981 | 1.00 | 2.00 | CARG |
| ATOM | 2628 | H2  | BGLC | 6 | -8.554  | -1.701-133.002 | 1.00 | 0.00 | CARG |
| ATOM | 2629 | O2  | BGLC | 6 | -6.686  | -1.006-132.448 | 1.00 | 2.00 | CARG |
| ATOM | 2630 | HO2 | BGLC | 6 | -6.420  | -1.921-132.435 | 1.00 | 0.00 | CARG |
| ATOM | 2631 | C3  | BGLC | 6 | -7.874  | -0.122-134.364 | 1.00 | 2.00 | CARG |
| ATOM | 2632 | H3  | BGLC | 6 | -7.150  | 0.691-134.319  | 1.00 | 0.00 | CARG |
| ATOM | 2633 | O3  | BGLC | 6 | -7.529  | -1.155-135.308 | 1.00 | 2.00 | CARG |
| ATOM | 2634 | HO3 | BGLC | 6 | -6.664  | -1.534-135.316 | 1.00 | 0.00 | CARG |
| ATOM | 2635 | C4  | BGLC | 6 | -9.158  | 0.573-134.782  | 1.00 | 2.00 | CARG |
| ATOM | 2636 | H4  | BGLC | 6 | -9.871  | -0.216-135.001 | 1.00 | 0.00 | CARG |
| ATOM | 2637 | O4  | BGLC | 6 | -9.095  | 1.226-136.011  | 1.00 | 2.00 | CARG |
| ATOM | 2638 | C6  | BGLC | 6 | -11.123 | 1.986-134.036  | 1.00 | 2.00 | CARG |
| ATOM | 2639 | O61 | BGLC | 6 | -11.143 | 3.401-134.085  | 1.00 | 0.00 | CARG |
| ATOM | 2640 | O62 | BGLC | 6 | -11.802 | 1.136-134.152  | 1.00 | 0.00 | CARG |
| ATOM | 2641 | C1  | BGLC | 7 | -9.265  | 0.596-137.188  | 1.00 | 2.00 | CARG |
| ATOM | 2642 | H1  | BGLC | 7 | -9.934  | -0.251-137.089 | 1.00 | 0.00 | CARG |
| ATOM | 2643 | C5  | BGLC | 7 | -8.132  | -0.591-138.914 | 1.00 | 2.00 | CARG |
| ATOM | 2644 | H5  | BGLC | 7 | -8.858  | -1.422-138.799 | 1.00 | 0.00 | CARG |

|      |      |     |      |   |         |                |      |      |      |
|------|------|-----|------|---|---------|----------------|------|------|------|
| ATOM | 2645 | O5  | BGLC | 7 | -8.012  | 0.161-137.692  | 1.00 | 2.00 | CARG |
| ATOM | 2646 | C2  | BGLC | 7 | -9.887  | 1.593-138.175  | 1.00 | 2.00 | CARG |
| ATOM | 2647 | H2  | BGLC | 7 | -9.311  | 2.574-138.201  | 1.00 | 0.00 | CARG |
| ATOM | 2648 | O2  | BGLC | 7 | -11.183 | 1.883-137.642  | 1.00 | 2.00 | CARG |
| ATOM | 2649 | HO2 | BGLC | 7 | -11.449 | 2.798-137.633  | 1.00 | 0.00 | CARG |
| ATOM | 2650 | C3  | BGLC | 7 | -9.996  | 0.991-139.556  | 1.00 | 2.00 | CARG |
| ATOM | 2651 | H3  | BGLC | 7 | -10.720 | 0.178-139.507  | 1.00 | 0.00 | CARG |
| ATOM | 2652 | O3  | BGLC | 7 | -10.341 | 2.019-140.504  | 1.00 | 2.00 | CARG |
| ATOM | 2653 | HO3 | BGLC | 7 | -11.205 | 2.399-140.513  | 1.00 | 0.00 | CARG |
| ATOM | 2654 | C4  | BGLC | 7 | -8.712  | 0.294-139.972  | 1.00 | 2.00 | CARG |
| ATOM | 2655 | H4  | BGLC | 7 | -7.999  | 1.082-140.195  | 1.00 | 0.00 | CARG |
| ATOM | 2656 | O4  | BGLC | 7 | -8.775  | -0.363-141.198 | 1.00 | 2.00 | CARG |
| ATOM | 2657 | C6  | BGLC | 7 | -6.747  | -1.115-139.222 | 1.00 | 2.00 | CARG |
| ATOM | 2658 | H61 | BGLC | 7 | -6.226  | -0.211-139.697 | 1.00 | 0.00 | CARG |
| ATOM | 2659 | H62 | BGLC | 7 | -6.100  | -1.374-138.390 | 1.00 | 0.00 | CARG |
| ATOM | 2660 | O6  | BGLC | 7 | -6.802  | -2.068-140.270 | 1.00 | 2.00 | CARG |
| ATOM | 2661 | HO6 | BGLC | 7 | -7.385  | -2.815-140.181 | 1.00 | 0.00 | CARG |
| ATOM | 2662 | C1  | BGLC | 8 | -8.607  | 0.262-142.378  | 1.00 | 2.00 | CARG |
| ATOM | 2663 | H1  | BGLC | 8 | -7.938  | 1.110-142.283  | 1.00 | 0.00 | CARG |
| ATOM | 2664 | C5  | BGLC | 8 | -9.742  | 1.442-144.108  | 1.00 | 2.00 | CARG |
| ATOM | 2665 | H5  | BGLC | 8 | -9.016  | 2.273-143.998  | 1.00 | 0.00 | CARG |
| ATOM | 2666 | O5  | BGLC | 8 | -9.860  | 0.694-142.882  | 1.00 | 2.00 | CARG |
| ATOM | 2667 | C2  | BGLC | 8 | -7.985  | -0.740-143.361 | 1.00 | 2.00 | CARG |
| ATOM | 2668 | H2  | BGLC | 8 | -8.559  | -1.722-143.382 | 1.00 | 0.00 | CARG |
| ATOM | 2669 | O2  | BGLC | 8 | -6.690  | -1.027-142.828 | 1.00 | 2.00 | CARG |
| ATOM | 2670 | HO2 | BGLC | 8 | -6.424  | -1.942-142.815 | 1.00 | 0.00 | CARG |
| ATOM | 2671 | C3  | BGLC | 8 | -7.879  | -0.143-144.744 | 1.00 | 2.00 | CARG |
| ATOM | 2672 | H3  | BGLC | 8 | -7.155  | 0.670-144.699  | 1.00 | 0.00 | CARG |
| ATOM | 2673 | O3  | BGLC | 8 | -7.533  | -1.176-145.688 | 1.00 | 2.00 | CARG |
| ATOM | 2674 | HO3 | BGLC | 8 | -6.668  | -1.555-145.696 | 1.00 | 0.00 | CARG |
| ATOM | 2675 | C4  | BGLC | 8 | -9.163  | 0.552-145.162  | 1.00 | 2.00 | CARG |
| ATOM | 2676 | H4  | BGLC | 8 | -9.876  | -0.236-145.381 | 1.00 | 0.00 | CARG |
| ATOM | 2677 | O4  | BGLC | 8 | -9.100  | 1.206-146.391  | 1.00 | 2.00 | CARG |
| ATOM | 2678 | C6  | BGLC | 8 | -11.126 | 1.965-144.416  | 1.00 | 2.00 | CARG |
| ATOM | 2679 | H61 | BGLC | 8 | -11.649 | 1.059-144.886  | 1.00 | 0.00 | CARG |
| ATOM | 2680 | H62 | BGLC | 8 | -11.772 | 2.229-143.585  | 1.00 | 0.00 | CARG |
| ATOM | 2681 | O6  | BGLC | 8 | -11.072 | 2.912-145.468  | 1.00 | 2.00 | CARG |
| ATOM | 2682 | HO6 | BGLC | 8 | -10.488 | 3.659-145.383  | 1.00 | 0.00 | CARG |
| ATOM | 2683 | C1  | BGLC | 9 | -9.269  | 0.576-147.568  | 1.00 | 2.00 | CARG |
| ATOM | 2684 | H1  | BGLC | 9 | -9.939  | -0.270-147.469 | 1.00 | 0.00 | CARG |
| ATOM | 2685 | C5  | BGLC | 9 | -8.136  | -0.612-149.294 | 1.00 | 2.00 | CARG |
| ATOM | 2686 | H5  | BGLC | 9 | -8.862  | -1.443-149.180 | 1.00 | 0.00 | CARG |
| ATOM | 2687 | O5  | BGLC | 9 | -8.016  | 0.139-148.072  | 1.00 | 2.00 | CARG |
| ATOM | 2688 | C2  | BGLC | 9 | -9.892  | 1.573-148.555  | 1.00 | 2.00 | CARG |
| ATOM | 2689 | H2  | BGLC | 9 | -9.317  | 2.554-148.581  | 1.00 | 0.00 | CARG |
| ATOM | 2690 | O2  | BGLC | 9 | -11.186 | 1.863-148.022  | 1.00 | 2.00 | CARG |
| ATOM | 2691 | HO2 | BGLC | 9 | -11.452 | 2.778-148.013  | 1.00 | 0.00 | CARG |
| ATOM | 2692 | C3  | BGLC | 9 | -10.000 | 0.970-149.936  | 1.00 | 2.00 | CARG |
| ATOM | 2693 | H3  | BGLC | 9 | -10.724 | 0.157-149.887  | 1.00 | 0.00 | CARG |
| ATOM | 2694 | O3  | BGLC | 9 | -10.346 | 1.999-150.884  | 1.00 | 2.00 | CARG |
| ATOM | 2695 | HO3 | BGLC | 9 | -11.210 | 2.378-150.893  | 1.00 | 0.00 | CARG |
| ATOM | 2696 | C4  | BGLC | 9 | -8.717  | 0.274-150.352  | 1.00 | 2.00 | CARG |
| ATOM | 2697 | H4  | BGLC | 9 | -8.005  | 1.063-150.574  | 1.00 | 0.00 | CARG |
| ATOM | 2698 | O4  | BGLC | 9 | -8.779  | -0.385-151.578 | 1.00 | 2.00 | CARG |

|      |      |     |      |    |         |                |      |      |      |
|------|------|-----|------|----|---------|----------------|------|------|------|
| ATOM | 2699 | C6  | BGLC | 9  | -6.751  | -1.136-149.602 | 1.00 | 2.00 | CARG |
| ATOM | 2700 | H61 | BGLC | 9  | -6.229  | -0.232-150.077 | 1.00 | 0.00 | CARG |
| ATOM | 2701 | H62 | BGLC | 9  | -6.104  | -1.396-148.770 | 1.00 | 0.00 | CARG |
| ATOM | 2702 | O6  | BGLC | 9  | -6.807  | -2.087-150.650 | 1.00 | 2.00 | CARG |
| ATOM | 2703 | HO6 | BGLC | 9  | -7.391  | -2.834-150.561 | 1.00 | 0.00 | CARG |
| ATOM | 2704 | C1  | BGLC | 10 | -8.611  | 0.240-152.758  | 1.00 | 2.00 | CARG |
| ATOM | 2705 | H1  | BGLC | 10 | -7.941  | 1.087-152.664  | 1.00 | 0.00 | CARG |
| ATOM | 2706 | C5  | BGLC | 10 | -9.746  | 1.421-154.488  | 1.00 | 2.00 | CARG |
| ATOM | 2707 | H5  | BGLC | 10 | -9.019  | 2.252-154.378  | 1.00 | 0.00 | CARG |
| ATOM | 2708 | O5  | BGLC | 10 | -9.865  | 0.674-153.262  | 1.00 | 2.00 | CARG |
| ATOM | 2709 | C2  | BGLC | 10 | -7.990  | -0.762-153.741 | 1.00 | 2.00 | CARG |
| ATOM | 2710 | H2  | BGLC | 10 | -8.563  | -1.745-153.764 | 1.00 | 0.00 | CARG |
| ATOM | 2711 | O2  | BGLC | 10 | -6.694  | -1.047-153.208 | 1.00 | 2.00 | CARG |
| ATOM | 2712 | HO2 | BGLC | 10 | -6.427  | -1.961-153.194 | 1.00 | 0.00 | CARG |
| ATOM | 2713 | C3  | BGLC | 10 | -7.884  | -0.163-155.124 | 1.00 | 2.00 | CARG |
| ATOM | 2714 | H3  | BGLC | 10 | -7.161  | 0.650-155.079  | 1.00 | 0.00 | CARG |
| ATOM | 2715 | O3  | BGLC | 10 | -7.538  | -1.196-156.068 | 1.00 | 2.00 | CARG |
| ATOM | 2716 | HO3 | BGLC | 10 | -6.673  | -1.575-156.076 | 1.00 | 0.00 | CARG |
| ATOM | 2717 | C4  | BGLC | 10 | -9.168  | 0.531-155.542  | 1.00 | 2.00 | CARG |
| ATOM | 2718 | H4  | BGLC | 10 | -9.882  | -0.257-155.761 | 1.00 | 0.00 | CARG |
| ATOM | 2719 | O4  | BGLC | 10 | -9.105  | 1.185-156.771  | 1.00 | 2.00 | CARG |
| ATOM | 2720 | C6  | BGLC | 10 | -11.131 | 1.945-154.796  | 1.00 | 2.00 | CARG |
| ATOM | 2721 | O61 | BGLC | 10 | -11.150 | 3.360-154.845  | 1.00 | 0.00 | CARG |
| ATOM | 2722 | O62 | BGLC | 10 | -11.810 | 1.095-154.912  | 1.00 | 0.00 | CARG |
| ATOM | 2723 | C1  | BGLC | 11 | -9.274  | 0.555-157.948  | 1.00 | 2.00 | CARG |
| ATOM | 2724 | H1  | BGLC | 11 | -9.943  | -0.292-157.849 | 1.00 | 0.00 | CARG |
| ATOM | 2725 | C5  | BGLC | 11 | -8.141  | -0.633-159.674 | 1.00 | 2.00 | CARG |
| ATOM | 2726 | H5  | BGLC | 11 | -8.867  | -1.464-159.559 | 1.00 | 0.00 | CARG |
| ATOM | 2727 | O5  | BGLC | 11 | -8.021  | 0.119-158.452  | 1.00 | 2.00 | CARG |
| ATOM | 2728 | C2  | BGLC | 11 | -9.897  | 1.552-158.935  | 1.00 | 2.00 | CARG |
| ATOM | 2729 | H2  | BGLC | 11 | -9.322  | 2.533-158.960  | 1.00 | 0.00 | CARG |
| ATOM | 2730 | O2  | BGLC | 11 | -11.191 | 1.842-158.402  | 1.00 | 2.00 | CARG |
| ATOM | 2731 | HO2 | BGLC | 11 | -11.457 | 2.757-158.393  | 1.00 | 0.00 | CARG |
| ATOM | 2732 | C3  | BGLC | 11 | -10.003 | 0.950-160.316  | 1.00 | 2.00 | CARG |
| ATOM | 2733 | H3  | BGLC | 11 | -10.727 | 0.137-160.266  | 1.00 | 0.00 | CARG |
| ATOM | 2734 | O3  | BGLC | 11 | -10.351 | 1.978-161.264  | 1.00 | 2.00 | CARG |
| ATOM | 2735 | HO3 | BGLC | 11 | -11.216 | 2.355-161.273  | 1.00 | 0.00 | CARG |
| ATOM | 2736 | C4  | BGLC | 11 | -8.720  | 0.253-160.732  | 1.00 | 2.00 | CARG |
| ATOM | 2737 | H4  | BGLC | 11 | -8.006  | 1.040-160.955  | 1.00 | 0.00 | CARG |
| ATOM | 2738 | O4  | BGLC | 11 | -8.784  | -0.406-161.958 | 1.00 | 2.00 | CARG |
| ATOM | 2739 | C6  | BGLC | 11 | -6.755  | -1.158-159.982 | 1.00 | 2.00 | CARG |
| ATOM | 2740 | H61 | BGLC | 11 | -6.232  | -0.254-160.456 | 1.00 | 0.00 | CARG |
| ATOM | 2741 | H62 | BGLC | 11 | -6.108  | -1.419-159.150 | 1.00 | 0.00 | CARG |
| ATOM | 2742 | O6  | BGLC | 11 | -6.812  | -2.108-161.030 | 1.00 | 2.00 | CARG |
| ATOM | 2743 | HO6 | BGLC | 11 | -7.396  | -2.854-160.942 | 1.00 | 0.00 | CARG |
| ATOM | 2744 | C1  | BGLC | 12 | -8.615  | 0.219-163.138  | 1.00 | 2.00 | CARG |
| ATOM | 2745 | H1  | BGLC | 12 | -7.945  | 1.065-163.043  | 1.00 | 0.00 | CARG |
| ATOM | 2746 | C5  | BGLC | 12 | -9.751  | 1.400-164.868  | 1.00 | 2.00 | CARG |
| ATOM | 2747 | H5  | BGLC | 12 | -9.024  | 2.231-164.759  | 1.00 | 0.00 | CARG |
| ATOM | 2748 | O5  | BGLC | 12 | -9.869  | 0.654-163.642  | 1.00 | 2.00 | CARG |
| ATOM | 2749 | C2  | BGLC | 12 | -7.994  | -0.781-164.121 | 1.00 | 2.00 | CARG |
| ATOM | 2750 | H2  | BGLC | 12 | -8.569  | -1.762-164.143 | 1.00 | 0.00 | CARG |
| ATOM | 2751 | O2  | BGLC | 12 | -6.698  | -1.068-163.588 | 1.00 | 2.00 | CARG |
| ATOM | 2752 | HO2 | BGLC | 12 | -6.431  | -1.983-163.575 | 1.00 | 0.00 | CARG |

|      |      |     |      |    |         |                |      |      |      |
|------|------|-----|------|----|---------|----------------|------|------|------|
| ATOM | 2753 | C3  | BGLC | 12 | -7.887  | -0.184-165.504 | 1.00 | 2.00 | CARG |
| ATOM | 2754 | H3  | BGLC | 12 | -7.164  | 0.629-165.459  | 1.00 | 0.00 | CARG |
| ATOM | 2755 | O3  | BGLC | 12 | -7.541  | -1.217-166.448 | 1.00 | 2.00 | CARG |
| ATOM | 2756 | HO3 | BGLC | 12 | -6.676  | -1.596-166.456 | 1.00 | 0.00 | CARG |
| ATOM | 2757 | C4  | BGLC | 12 | -9.173  | 0.511-165.922  | 1.00 | 2.00 | CARG |
| ATOM | 2758 | H4  | BGLC | 12 | -9.887  | -0.277-166.141 | 1.00 | 0.00 | CARG |
| ATOM | 2759 | O4  | BGLC | 12 | -9.110  | 1.165-167.151  | 1.00 | 2.00 | CARG |
| ATOM | 2760 | C6  | BGLC | 12 | -11.136 | 1.924-165.176  | 1.00 | 2.00 | CARG |
| ATOM | 2761 | H61 | BGLC | 12 | -11.660 | 1.019-165.647  | 1.00 | 0.00 | CARG |
| ATOM | 2762 | H62 | BGLC | 12 | -11.782 | 2.188-164.344  | 1.00 | 0.00 | CARG |
| ATOM | 2763 | O6  | BGLC | 12 | -11.080 | 2.871-166.228  | 1.00 | 2.00 | CARG |
| ATOM | 2764 | HO6 | BGLC | 12 | -10.495 | 3.618-166.143  | 1.00 | 0.00 | CARG |
| ATOM | 2765 | C1  | BGLC | 13 | -9.278  | 0.534-168.328  | 1.00 | 2.00 | CARG |
| ATOM | 2766 | H1  | BGLC | 13 | -9.947  | -0.313-168.229 | 1.00 | 0.00 | CARG |
| ATOM | 2767 | C5  | BGLC | 13 | -8.145  | -0.654-170.054 | 1.00 | 2.00 | CARG |
| ATOM | 2768 | H5  | BGLC | 13 | -8.871  | -1.485-169.939 | 1.00 | 0.00 | CARG |
| ATOM | 2769 | O5  | BGLC | 13 | -8.025  | 0.098-168.832  | 1.00 | 2.00 | CARG |
| ATOM | 2770 | C2  | BGLC | 13 | -9.901  | 1.532-169.315  | 1.00 | 2.00 | CARG |
| ATOM | 2771 | H2  | BGLC | 13 | -9.326  | 2.513-169.342  | 1.00 | 0.00 | CARG |
| ATOM | 2772 | O2  | BGLC | 13 | -11.196 | 1.822-168.782  | 1.00 | 2.00 | CARG |
| ATOM | 2773 | HO2 | BGLC | 13 | -11.462 | 2.737-168.773  | 1.00 | 0.00 | CARG |
| ATOM | 2774 | C3  | BGLC | 13 | -10.009 | 0.928-170.696  | 1.00 | 2.00 | CARG |
| ATOM | 2775 | H3  | BGLC | 13 | -10.732 | 0.115-170.648  | 1.00 | 0.00 | CARG |
| ATOM | 2776 | O3  | BGLC | 13 | -10.356 | 1.958-171.643  | 1.00 | 2.00 | CARG |
| ATOM | 2777 | HO3 | BGLC | 13 | -11.221 | 2.337-171.651  | 1.00 | 0.00 | CARG |
| ATOM | 2778 | C4  | BGLC | 13 | -8.724  | 0.232-171.112  | 1.00 | 2.00 | CARG |
| ATOM | 2779 | H4  | BGLC | 13 | -8.010  | 1.019-171.335  | 1.00 | 0.00 | CARG |
| ATOM | 2780 | O4  | BGLC | 13 | -8.789  | -0.426-172.338 | 1.00 | 2.00 | CARG |
| ATOM | 2781 | C6  | BGLC | 13 | -6.760  | -1.178-170.362 | 1.00 | 2.00 | CARG |
| ATOM | 2782 | H61 | BGLC | 13 | -6.238  | -0.274-170.837 | 1.00 | 0.00 | CARG |
| ATOM | 2783 | H62 | BGLC | 13 | -6.113  | -1.438-169.530 | 1.00 | 0.00 | CARG |
| ATOM | 2784 | O6  | BGLC | 13 | -6.817  | -2.128-171.410 | 1.00 | 2.00 | CARG |
| ATOM | 2785 | HO6 | BGLC | 13 | -7.401  | -2.875-171.321 | 1.00 | 0.00 | CARG |
| ATOM | 2786 | C1  | BGLC | 14 | -8.620  | 0.199-173.518  | 1.00 | 2.00 | CARG |
| ATOM | 2787 | H1  | BGLC | 14 | -7.950  | 1.045-173.423  | 1.00 | 0.00 | CARG |
| ATOM | 2788 | C5  | BGLC | 14 | -9.755  | 1.380-175.248  | 1.00 | 2.00 | CARG |
| ATOM | 2789 | H5  | BGLC | 14 | -9.029  | 2.211-175.138  | 1.00 | 0.00 | CARG |
| ATOM | 2790 | O5  | BGLC | 14 | -9.874  | 0.634-174.022  | 1.00 | 2.00 | CARG |
| ATOM | 2791 | C2  | BGLC | 14 | -7.998  | -0.803-174.501 | 1.00 | 2.00 | CARG |
| ATOM | 2792 | H2  | BGLC | 14 | -8.571  | -1.785-174.524 | 1.00 | 0.00 | CARG |
| ATOM | 2793 | O2  | BGLC | 14 | -6.703  | -1.088-173.968 | 1.00 | 2.00 | CARG |
| ATOM | 2794 | HO2 | BGLC | 14 | -6.436  | -2.002-173.954 | 1.00 | 0.00 | CARG |
| ATOM | 2795 | C3  | BGLC | 14 | -7.891  | -0.205-175.884 | 1.00 | 2.00 | CARG |
| ATOM | 2796 | H3  | BGLC | 14 | -7.167  | 0.608-175.839  | 1.00 | 0.00 | CARG |
| ATOM | 2797 | O3  | BGLC | 14 | -7.546  | -1.237-176.828 | 1.00 | 2.00 | CARG |
| ATOM | 2798 | HO3 | BGLC | 14 | -6.682  | -1.617-176.836 | 1.00 | 0.00 | CARG |
| ATOM | 2799 | C4  | BGLC | 14 | -9.176  | 0.490-176.302  | 1.00 | 2.00 | CARG |
| ATOM | 2800 | H4  | BGLC | 14 | -9.889  | -0.299-176.521 | 1.00 | 0.00 | CARG |
| ATOM | 2801 | O4  | BGLC | 14 | -9.114  | 1.143-177.531  | 1.00 | 2.00 | CARG |
| ATOM | 2802 | C6  | BGLC | 14 | -11.141 | 1.902-175.556  | 1.00 | 2.00 | CARG |
| ATOM | 2803 | O61 | BGLC | 14 | -11.162 | 3.317-175.606  | 1.00 | 0.00 | CARG |
| ATOM | 2804 | O62 | BGLC | 14 | -11.819 | 1.051-175.671  | 1.00 | 0.00 | CARG |
| ATOM | 2805 | C1  | BGLC | 15 | -9.283  | 0.513-178.708  | 1.00 | 2.00 | CARG |
| ATOM | 2806 | H1  | BGLC | 15 | -9.952  | -0.334-178.609 | 1.00 | 0.00 | CARG |

|      |      |     |      |    |         |                |      |      |      |
|------|------|-----|------|----|---------|----------------|------|------|------|
| ATOM | 2807 | C5  | BGLC | 15 | -8.149  | -0.675-180.434 | 1.00 | 2.00 | CARG |
| ATOM | 2808 | H5  | BGLC | 15 | -8.874  | -1.506-180.319 | 1.00 | 0.00 | CARG |
| ATOM | 2809 | O5  | BGLC | 15 | -8.030  | 0.078-179.212  | 1.00 | 2.00 | CARG |
| ATOM | 2810 | C2  | BGLC | 15 | -9.905  | 1.510-179.695  | 1.00 | 2.00 | CARG |
| ATOM | 2811 | H2  | BGLC | 15 | -9.329  | 2.490-179.721  | 1.00 | 0.00 | CARG |
| ATOM | 2812 | O2  | BGLC | 15 | -11.201 | 1.802-179.162  | 1.00 | 2.00 | CARG |
| ATOM | 2813 | HO2 | BGLC | 15 | -11.466 | 2.717-179.154  | 1.00 | 0.00 | CARG |
| ATOM | 2814 | C3  | BGLC | 15 | -10.013 | 0.907-181.076  | 1.00 | 2.00 | CARG |
| ATOM | 2815 | H3  | BGLC | 15 | -10.737 | 0.094-181.029  | 1.00 | 0.00 | CARG |
| ATOM | 2816 | O3  | BGLC | 15 | -10.359 | 1.937-182.023  | 1.00 | 2.00 | CARG |
| ATOM | 2817 | HO3 | BGLC | 15 | -11.223 | 2.317-182.031  | 1.00 | 0.00 | CARG |
| ATOM | 2818 | C4  | BGLC | 15 | -8.729  | 0.211-181.492  | 1.00 | 2.00 | CARG |
| ATOM | 2819 | H4  | BGLC | 15 | -8.015  | 0.998-181.716  | 1.00 | 0.00 | CARG |
| ATOM | 2820 | O4  | BGLC | 15 | -8.794  | -0.447-182.718 | 1.00 | 2.00 | CARG |
| ATOM | 2821 | C6  | BGLC | 15 | -6.763  | -1.199-180.742 | 1.00 | 2.00 | CARG |
| ATOM | 2822 | H61 | BGLC | 15 | -6.241  | -0.295-181.217 | 1.00 | 0.00 | CARG |
| ATOM | 2823 | H62 | BGLC | 15 | -6.116  | -1.459-179.910 | 1.00 | 0.00 | CARG |
| ATOM | 2824 | O6  | BGLC | 15 | -6.820  | -2.150-181.790 | 1.00 | 2.00 | CARG |
| ATOM | 2825 | HO6 | BGLC | 15 | -7.404  | -2.897-181.701 | 1.00 | 0.00 | CARG |
| ATOM | 2826 | C1  | BGLC | 16 | -8.625  | 0.178-183.898  | 1.00 | 2.00 | CARG |
| ATOM | 2827 | H1  | BGLC | 16 | -7.955  | 1.024-183.803  | 1.00 | 0.00 | CARG |
| ATOM | 2828 | C5  | BGLC | 16 | -9.759  | 1.359-185.628  | 1.00 | 2.00 | CARG |
| ATOM | 2829 | H5  | BGLC | 16 | -9.032  | 2.190-185.518  | 1.00 | 0.00 | CARG |
| ATOM | 2830 | O5  | BGLC | 16 | -9.879  | 0.613-184.402  | 1.00 | 2.00 | CARG |
| ATOM | 2831 | C2  | BGLC | 16 | -8.002  | -0.822-184.881 | 1.00 | 2.00 | CARG |
| ATOM | 2832 | H2  | BGLC | 16 | -8.577  | -1.803-184.902 | 1.00 | 0.00 | CARG |
| ATOM | 2833 | O2  | BGLC | 16 | -6.708  | -1.110-184.348 | 1.00 | 2.00 | CARG |
| ATOM | 2834 | HO2 | BGLC | 16 | -6.442  | -2.025-184.336 | 1.00 | 0.00 | CARG |
| ATOM | 2835 | C3  | BGLC | 16 | -7.896  | -0.226-186.264 | 1.00 | 2.00 | CARG |
| ATOM | 2836 | H3  | BGLC | 16 | -7.172  | 0.587-186.219  | 1.00 | 0.00 | CARG |
| ATOM | 2837 | O3  | BGLC | 16 | -7.551  | -1.258-187.208 | 1.00 | 2.00 | CARG |
| ATOM | 2838 | HO3 | BGLC | 16 | -6.686  | -1.637-187.217 | 1.00 | 0.00 | CARG |
| ATOM | 2839 | C4  | BGLC | 16 | -9.181  | 0.470-186.682  | 1.00 | 2.00 | CARG |
| ATOM | 2840 | H4  | BGLC | 16 | -9.895  | -0.318-186.901 | 1.00 | 0.00 | CARG |
| ATOM | 2841 | O4  | BGLC | 16 | -9.118  | 1.122-187.911  | 1.00 | 2.00 | CARG |
| ATOM | 2842 | C6  | BGLC | 16 | -11.145 | 1.882-185.936  | 1.00 | 2.00 | CARG |
| ATOM | 2843 | H61 | BGLC | 16 | -11.668 | 0.976-186.407  | 1.00 | 0.00 | CARG |
| ATOM | 2844 | H62 | BGLC | 16 | -11.791 | 2.145-185.104  | 1.00 | 0.00 | CARG |
| ATOM | 2845 | O6  | BGLC | 16 | -11.090 | 2.830-186.988  | 1.00 | 2.00 | CARG |
| ATOM | 2846 | HO6 | BGLC | 16 | -10.506 | 3.577-186.903  | 1.00 | 0.00 | CARG |
| ATOM | 2847 | C1  | BGLC | 17 | -9.287  | 0.492-189.088  | 1.00 | 2.00 | CARG |
| ATOM | 2848 | H1  | BGLC | 17 | -9.956  | -0.355-188.989 | 1.00 | 0.00 | CARG |
| ATOM | 2849 | C5  | BGLC | 17 | -8.154  | -0.695-190.814 | 1.00 | 2.00 | CARG |
| ATOM | 2850 | H5  | BGLC | 17 | -8.880  | -1.526-190.699 | 1.00 | 0.00 | CARG |
| ATOM | 2851 | O5  | BGLC | 17 | -8.034  | 0.057-189.592  | 1.00 | 2.00 | CARG |
| ATOM | 2852 | C2  | BGLC | 17 | -9.909  | 1.491-190.075  | 1.00 | 2.00 | CARG |
| ATOM | 2853 | H2  | BGLC | 17 | -9.335  | 2.472-190.102  | 1.00 | 0.00 | CARG |
| ATOM | 2854 | O2  | BGLC | 17 | -11.205 | 1.780-189.542  | 1.00 | 2.00 | CARG |
| ATOM | 2855 | HO2 | BGLC | 17 | -11.471 | 2.695-189.532  | 1.00 | 0.00 | CARG |
| ATOM | 2856 | C3  | BGLC | 17 | -10.018 | 0.887-191.456  | 1.00 | 2.00 | CARG |
| ATOM | 2857 | H3  | BGLC | 17 | -10.742 | 0.074-191.408  | 1.00 | 0.00 | CARG |
| ATOM | 2858 | O3  | BGLC | 17 | -10.364 | 1.916-192.403  | 1.00 | 2.00 | CARG |
| ATOM | 2859 | HO3 | BGLC | 17 | -11.228 | 2.296-192.411  | 1.00 | 0.00 | CARG |
| ATOM | 2860 | C4  | BGLC | 17 | -8.733  | 0.190-191.872  | 1.00 | 2.00 | CARG |

|      |      |     |      |    |         |                |      |      |      |
|------|------|-----|------|----|---------|----------------|------|------|------|
| ATOM | 2861 | H4  | BGLC | 17 | -8.019  | 0.977-192.095  | 1.00 | 0.00 | CARG |
| ATOM | 2862 | O4  | BGLC | 17 | -8.798  | -0.467-193.098 | 1.00 | 2.00 | CARG |
| ATOM | 2863 | C6  | BGLC | 17 | -6.768  | -1.219-191.122 | 1.00 | 2.00 | CARG |
| ATOM | 2864 | H61 | BGLC | 17 | -6.246  | -0.315-191.598 | 1.00 | 0.00 | CARG |
| ATOM | 2865 | H62 | BGLC | 17 | -6.121  | -1.478-190.290 | 1.00 | 0.00 | CARG |
| ATOM | 2866 | O6  | BGLC | 17 | -6.825  | -2.171-192.170 | 1.00 | 2.00 | CARG |
| ATOM | 2867 | HO6 | BGLC | 17 | -7.409  | -2.918-192.080 | 1.00 | 0.00 | CARG |
| ATOM | 2868 | C1  | BGLC | 18 | -8.630  | 0.158-194.278  | 1.00 | 2.00 | CARG |
| ATOM | 2869 | H1  | BGLC | 18 | -7.961  | 1.005-194.183  | 1.00 | 0.00 | CARG |
| ATOM | 2870 | C5  | BGLC | 18 | -9.764  | 1.338-196.008  | 1.00 | 2.00 | CARG |
| ATOM | 2871 | H5  | BGLC | 18 | -9.038  | 2.169-195.898  | 1.00 | 0.00 | CARG |
| ATOM | 2872 | O5  | BGLC | 18 | -9.883  | 0.591-194.782  | 1.00 | 2.00 | CARG |
| ATOM | 2873 | C2  | BGLC | 18 | -8.007  | -0.843-195.261 | 1.00 | 2.00 | CARG |
| ATOM | 2874 | H2  | BGLC | 18 | -8.582  | -1.824-195.283 | 1.00 | 0.00 | CARG |
| ATOM | 2875 | O2  | BGLC | 18 | -6.713  | -1.131-194.728 | 1.00 | 2.00 | CARG |
| ATOM | 2876 | HO2 | BGLC | 18 | -6.447  | -2.046-194.716 | 1.00 | 0.00 | CARG |
| ATOM | 2877 | C3  | BGLC | 18 | -7.901  | -0.245-196.644 | 1.00 | 2.00 | CARG |
| ATOM | 2878 | H3  | BGLC | 18 | -7.178  | 0.568-196.601  | 1.00 | 0.00 | CARG |
| ATOM | 2879 | O3  | BGLC | 18 | -7.555  | -1.280-197.588 | 1.00 | 2.00 | CARG |
| ATOM | 2880 | HO3 | BGLC | 18 | -6.690  | -1.659-197.596 | 1.00 | 0.00 | CARG |
| ATOM | 2881 | C4  | BGLC | 18 | -9.186  | 0.449-197.062  | 1.00 | 2.00 | CARG |
| ATOM | 2882 | H4  | BGLC | 18 | -9.900  | -0.339-197.282 | 1.00 | 0.00 | CARG |
| ATOM | 2883 | O4  | BGLC | 18 | -9.122  | 1.102-198.291  | 1.00 | 2.00 | CARG |
| ATOM | 2884 | C6  | BGLC | 18 | -11.150 | 1.861-196.316  | 1.00 | 2.00 | CARG |
| ATOM | 2885 | H61 | BGLC | 18 | -11.673 | 0.956-196.787  | 1.00 | 0.00 | CARG |
| ATOM | 2886 | H62 | BGLC | 18 | -11.796 | 2.124-195.484  | 1.00 | 0.00 | CARG |
| ATOM | 2887 | O6  | BGLC | 18 | -11.094 | 2.808-197.368  | 1.00 | 2.00 | CARG |
| ATOM | 2888 | HO6 | BGLC | 18 | -10.510 | 3.555-197.283  | 1.00 | 0.00 | CARG |
| ATOM | 2889 | C1  | BGLC | 19 | -9.291  | 0.472-199.468  | 1.00 | 2.00 | CARG |
| ATOM | 2890 | H1  | BGLC | 19 | -9.960  | -0.375-199.369 | 1.00 | 0.00 | CARG |
| ATOM | 2891 | C5  | BGLC | 19 | -8.158  | -0.715-201.194 | 1.00 | 2.00 | CARG |
| ATOM | 2892 | H5  | BGLC | 19 | -8.884  | -1.546-201.080 | 1.00 | 0.00 | CARG |
| ATOM | 2893 | O5  | BGLC | 19 | -8.038  | 0.037-199.972  | 1.00 | 2.00 | CARG |
| ATOM | 2894 | C2  | BGLC | 19 | -9.914  | 1.469-200.455  | 1.00 | 2.00 | CARG |
| ATOM | 2895 | H2  | BGLC | 19 | -9.339  | 2.450-200.481  | 1.00 | 0.00 | CARG |
| ATOM | 2896 | O2  | BGLC | 19 | -11.209 | 1.759-199.922  | 1.00 | 2.00 | CARG |
| ATOM | 2897 | HO2 | BGLC | 19 | -11.475 | 2.674-199.913  | 1.00 | 0.00 | CARG |
| ATOM | 2898 | C3  | BGLC | 19 | -10.023 | 0.867-201.835  | 1.00 | 2.00 | CARG |
| ATOM | 2899 | H3  | BGLC | 19 | -10.747 | 0.054-201.787  | 1.00 | 0.00 | CARG |
| ATOM | 2900 | O3  | BGLC | 19 | -10.368 | 1.896-202.783  | 1.00 | 2.00 | CARG |
| ATOM | 2901 | HO3 | BGLC | 19 | -11.232 | 2.276-202.792  | 1.00 | 0.00 | CARG |
| ATOM | 2902 | C4  | BGLC | 19 | -8.738  | 0.170-202.252  | 1.00 | 2.00 | CARG |
| ATOM | 2903 | H4  | BGLC | 19 | -8.025  | 0.958-202.475  | 1.00 | 0.00 | CARG |
| ATOM | 2904 | O4  | BGLC | 19 | -8.801  | -0.489-203.478 | 1.00 | 2.00 | CARG |
| ATOM | 2905 | C6  | BGLC | 19 | -6.773  | -1.240-201.502 | 1.00 | 2.00 | CARG |
| ATOM | 2906 | H61 | BGLC | 19 | -6.251  | -0.336-201.977 | 1.00 | 0.00 | CARG |
| ATOM | 2907 | H62 | BGLC | 19 | -6.126  | -1.500-200.670 | 1.00 | 0.00 | CARG |
| ATOM | 2908 | O6  | BGLC | 19 | -6.829  | -2.192-202.550 | 1.00 | 2.00 | CARG |
| ATOM | 2909 | HO6 | BGLC | 19 | -7.413  | -2.939-202.461 | 1.00 | 0.00 | CARG |
| ATOM | 2910 | C1  | BGLC | 20 | -8.634  | 0.137-204.658  | 1.00 | 2.00 | CARG |
| ATOM | 2911 | H1  | BGLC | 20 | -7.965  | 0.984-204.563  | 1.00 | 0.00 | CARG |
| ATOM | 2912 | C5  | BGLC | 20 | -9.769  | 1.317-206.388  | 1.00 | 2.00 | CARG |
| ATOM | 2913 | H5  | BGLC | 20 | -9.042  | 2.148-206.279  | 1.00 | 0.00 | CARG |
| ATOM | 2914 | O5  | BGLC | 20 | -9.887  | 0.571-205.162  | 1.00 | 2.00 | CARG |

|      |      |     |      |    |         |                |      |      |      |
|------|------|-----|------|----|---------|----------------|------|------|------|
| ATOM | 2915 | C2  | BGLC | 20 | -8.012  | -0.865-205.641 | 1.00 | 2.00 | CARG |
| ATOM | 2916 | H2  | BGLC | 20 | -8.586  | -1.847-205.664 | 1.00 | 0.00 | CARG |
| ATOM | 2917 | O2  | BGLC | 20 | -6.718  | -1.151-205.108 | 1.00 | 2.00 | CARG |
| ATOM | 2918 | HO2 | BGLC | 20 | -6.451  | -2.066-205.094 | 1.00 | 0.00 | CARG |
| ATOM | 2919 | C3  | BGLC | 20 | -7.905  | -0.267-207.024 | 1.00 | 2.00 | CARG |
| ATOM | 2920 | H3  | BGLC | 20 | -7.181  | 0.546-206.980  | 1.00 | 0.00 | CARG |
| ATOM | 2921 | O3  | BGLC | 20 | -7.560  | -1.300-207.968 | 1.00 | 2.00 | CARG |
| ATOM | 2922 | HO3 | BGLC | 20 | -6.696  | -1.680-207.976 | 1.00 | 0.00 | CARG |
| ATOM | 2923 | C4  | BGLC | 20 | -9.190  | 0.428-207.442  | 1.00 | 2.00 | CARG |
| ATOM | 2924 | H4  | BGLC | 20 | -9.940  | -0.302-207.731 | 1.00 | 0.00 | CARG |
| ATOM | 2925 | O4  | BGLC | 20 | -9.020  | 1.172-208.663  | 1.00 | 2.00 | CARG |
| ATOM | 2926 | HO4 | BGLC | 20 | -8.558  | 0.604-209.331  | 1.00 | 0.00 | CARG |
| ATOM | 2927 | C6  | BGLC | 20 | -11.154 | 1.841-206.696  | 1.00 | 2.00 | CARG |
| ATOM | 2928 | H61 | BGLC | 20 | -11.678 | 0.935-207.166  | 1.00 | 0.00 | CARG |
| ATOM | 2929 | H62 | BGLC | 20 | -11.799 | 2.105-205.864  | 1.00 | 0.00 | CARG |
| ATOM | 2930 | O6  | BGLC | 20 | -11.099 | 2.787-207.748  | 1.00 | 2.00 | CARG |
| ATOM | 2931 | HO6 | BGLC | 20 | -10.514 | 3.534-207.664  | 1.00 | 0.00 | CARG |
| ATOM | 2932 | C1  | BGLC | 1  | -3.256  | -4.937-106.040 | 1.00 | 2.00 | CARH |
| ATOM | 2933 | H1  | BGLC | 1  | -4.016  | -5.698-105.907 | 1.00 | 0.00 | CARH |
| ATOM | 2934 | O1  | BGLC | 1  | -2.978  | -4.216-104.854 | 1.00 | 2.00 | CARH |
| ATOM | 2935 | HO1 | BGLC | 1  | -2.591  | -3.410-105.119 | 1.00 | 0.00 | CARH |
| ATOM | 2936 | C5  | BGLC | 1  | -2.121  | -6.124-107.766 | 1.00 | 2.00 | CARH |
| ATOM | 2937 | H5  | BGLC | 1  | -2.847  | -6.955-107.653 | 1.00 | 0.00 | CARH |
| ATOM | 2938 | O5  | BGLC | 1  | -2.002  | -5.373-106.543 | 1.00 | 2.00 | CARH |
| ATOM | 2939 | C2  | BGLC | 1  | -3.876  | -3.939-107.026 | 1.00 | 2.00 | CARH |
| ATOM | 2940 | H2  | BGLC | 1  | -3.301  | -2.958-107.053 | 1.00 | 0.00 | CARH |
| ATOM | 2941 | O2  | BGLC | 1  | -5.172  | -3.649-106.493 | 1.00 | 2.00 | CARH |
| ATOM | 2942 | HO2 | BGLC | 1  | -5.438  | -2.734-106.483 | 1.00 | 0.00 | CARH |
| ATOM | 2943 | C3  | BGLC | 1  | -3.985  | -4.542-108.407 | 1.00 | 2.00 | CARH |
| ATOM | 2944 | H3  | BGLC | 1  | -4.709  | -5.354-108.358 | 1.00 | 0.00 | CARH |
| ATOM | 2945 | O3  | BGLC | 1  | -4.331  | -3.512-109.355 | 1.00 | 2.00 | CARH |
| ATOM | 2946 | HO3 | BGLC | 1  | -5.195  | -3.132-109.363 | 1.00 | 0.00 | CARH |
| ATOM | 2947 | C4  | BGLC | 1  | -2.701  | -5.240-108.823 | 1.00 | 2.00 | CARH |
| ATOM | 2948 | H4  | BGLC | 1  | -1.988  | -4.452-109.047 | 1.00 | 0.00 | CARH |
| ATOM | 2949 | O4  | BGLC | 1  | -2.765  | -5.899-110.050 | 1.00 | 2.00 | CARH |
| ATOM | 2950 | C6  | BGLC | 1  | -0.735  | -6.648-108.073 | 1.00 | 2.00 | CARH |
| ATOM | 2951 | H61 | BGLC | 1  | -0.213  | -5.745-108.549 | 1.00 | 0.00 | CARH |
| ATOM | 2952 | H62 | BGLC | 1  | -0.088  | -6.907-107.241 | 1.00 | 0.00 | CARH |
| ATOM | 2953 | O6  | BGLC | 1  | -0.792  | -7.601-109.121 | 1.00 | 2.00 | CARH |
| ATOM | 2954 | HO6 | BGLC | 1  | -1.376  | -8.348-109.031 | 1.00 | 0.00 | CARH |
| ATOM | 2955 | C1  | BGLC | 2  | -2.596  | -5.271-111.229 | 1.00 | 2.00 | CARH |
| ATOM | 2956 | H1  | BGLC | 2  | -1.927  | -4.424-111.132 | 1.00 | 0.00 | CARH |
| ATOM | 2957 | C5  | BGLC | 2  | -3.731  | -4.091-112.959 | 1.00 | 2.00 | CARH |
| ATOM | 2958 | H5  | BGLC | 2  | -3.005  | -3.260-112.849 | 1.00 | 0.00 | CARH |
| ATOM | 2959 | O5  | BGLC | 2  | -3.850  | -4.837-111.734 | 1.00 | 2.00 | CARH |
| ATOM | 2960 | C2  | BGLC | 2  | -1.974  | -6.273-112.213 | 1.00 | 2.00 | CARH |
| ATOM | 2961 | H2  | BGLC | 2  | -2.549  | -7.254-112.235 | 1.00 | 0.00 | CARH |
| ATOM | 2962 | O2  | BGLC | 2  | -0.680  | -6.561-111.680 | 1.00 | 2.00 | CARH |
| ATOM | 2963 | HO2 | BGLC | 2  | -0.414  | -7.476-111.667 | 1.00 | 0.00 | CARH |
| ATOM | 2964 | C3  | BGLC | 2  | -1.867  | -5.675-113.596 | 1.00 | 2.00 | CARH |
| ATOM | 2965 | H3  | BGLC | 2  | -1.143  | -4.862-113.553 | 1.00 | 0.00 | CARH |
| ATOM | 2966 | O3  | BGLC | 2  | -1.523  | -6.709-114.540 | 1.00 | 2.00 | CARH |
| ATOM | 2967 | HO3 | BGLC | 2  | -0.659  | -7.089-114.548 | 1.00 | 0.00 | CARH |
| ATOM | 2968 | C4  | BGLC | 2  | -3.153  | -4.980-114.014 | 1.00 | 2.00 | CARH |

|      |      |     |      |   |        |        |          |      |      |      |
|------|------|-----|------|---|--------|--------|----------|------|------|------|
| ATOM | 2969 | H4  | BGLC | 2 | -3.867 | -5.768 | -114.234 | 1.00 | 0.00 | CARH |
| ATOM | 2970 | O4  | BGLC | 2 | -3.089 | -4.327 | -115.243 | 1.00 | 2.00 | CARH |
| ATOM | 2971 | C6  | BGLC | 2 | -5.117 | -3.567 | -113.268 | 1.00 | 2.00 | CARH |
| ATOM | 2972 | H61 | BGLC | 2 | -5.640 | -4.473 | -113.738 | 1.00 | 0.00 | CARH |
| ATOM | 2973 | H62 | BGLC | 2 | -5.763 | -3.303 | -112.437 | 1.00 | 0.00 | CARH |
| ATOM | 2974 | O6  | BGLC | 2 | -5.062 | -2.620 | -114.320 | 1.00 | 2.00 | CARH |
| ATOM | 2975 | HO6 | BGLC | 2 | -4.478 | -1.873 | -114.235 | 1.00 | 0.00 | CARH |
| ATOM | 2976 | C1  | BGLC | 3 | -3.259 | -4.958 | -116.420 | 1.00 | 2.00 | CARH |
| ATOM | 2977 | H1  | BGLC | 3 | -3.928 | -5.805 | -116.320 | 1.00 | 0.00 | CARH |
| ATOM | 2978 | C5  | BGLC | 3 | -2.126 | -6.145 | -118.146 | 1.00 | 2.00 | CARH |
| ATOM | 2979 | H5  | BGLC | 3 | -2.852 | -6.976 | -118.032 | 1.00 | 0.00 | CARH |
| ATOM | 2980 | O5  | BGLC | 3 | -2.006 | -5.393 | -116.923 | 1.00 | 2.00 | CARH |
| ATOM | 2981 | C2  | BGLC | 3 | -3.882 | -3.960 | -117.406 | 1.00 | 2.00 | CARH |
| ATOM | 2982 | H2  | BGLC | 3 | -3.307 | -2.979 | -117.432 | 1.00 | 0.00 | CARH |
| ATOM | 2983 | O2  | BGLC | 3 | -5.177 | -3.670 | -116.873 | 1.00 | 2.00 | CARH |
| ATOM | 2984 | HO2 | BGLC | 3 | -5.443 | -2.755 | -116.863 | 1.00 | 0.00 | CARH |
| ATOM | 2985 | C3  | BGLC | 3 | -3.990 | -4.563 | -118.787 | 1.00 | 2.00 | CARH |
| ATOM | 2986 | H3  | BGLC | 3 | -4.714 | -5.376 | -118.739 | 1.00 | 0.00 | CARH |
| ATOM | 2987 | O3  | BGLC | 3 | -4.336 | -3.533 | -119.735 | 1.00 | 2.00 | CARH |
| ATOM | 2988 | HO3 | BGLC | 3 | -5.200 | -3.153 | -119.744 | 1.00 | 0.00 | CARH |
| ATOM | 2989 | C4  | BGLC | 3 | -2.706 | -5.260 | -119.203 | 1.00 | 2.00 | CARH |
| ATOM | 2990 | H4  | BGLC | 3 | -1.994 | -4.471 | -119.425 | 1.00 | 0.00 | CARH |
| ATOM | 2991 | O4  | BGLC | 3 | -2.768 | -5.919 | -120.430 | 1.00 | 2.00 | CARH |
| ATOM | 2992 | C6  | BGLC | 3 | -0.740 | -6.669 | -118.453 | 1.00 | 2.00 | CARH |
| ATOM | 2993 | H61 | BGLC | 3 | -0.218 | -5.765 | -118.928 | 1.00 | 0.00 | CARH |
| ATOM | 2994 | H62 | BGLC | 3 | -0.093 | -6.928 | -117.621 | 1.00 | 0.00 | CARH |
| ATOM | 2995 | O6  | BGLC | 3 | -0.796 | -7.621 | -119.501 | 1.00 | 2.00 | CARH |
| ATOM | 2996 | HO6 | BGLC | 3 | -1.380 | -8.368 | -119.412 | 1.00 | 0.00 | CARH |
| ATOM | 2997 | C1  | BGLC | 4 | -2.601 | -5.292 | -121.609 | 1.00 | 2.00 | CARH |
| ATOM | 2998 | H1  | BGLC | 4 | -1.932 | -4.444 | -121.513 | 1.00 | 0.00 | CARH |
| ATOM | 2999 | C5  | BGLC | 4 | -3.736 | -4.112 | -123.339 | 1.00 | 2.00 | CARH |
| ATOM | 3000 | H5  | BGLC | 4 | -3.010 | -3.281 | -123.229 | 1.00 | 0.00 | CARH |
| ATOM | 3001 | O5  | BGLC | 4 | -3.855 | -4.858 | -122.114 | 1.00 | 2.00 | CARH |
| ATOM | 3002 | C2  | BGLC | 4 | -1.979 | -6.294 | -122.593 | 1.00 | 2.00 | CARH |
| ATOM | 3003 | H2  | BGLC | 4 | -2.553 | -7.276 | -122.615 | 1.00 | 0.00 | CARH |
| ATOM | 3004 | O2  | BGLC | 4 | -0.684 | -6.581 | -122.059 | 1.00 | 2.00 | CARH |
| ATOM | 3005 | HO2 | BGLC | 4 | -0.418 | -7.496 | -122.046 | 1.00 | 0.00 | CARH |
| ATOM | 3006 | C3  | BGLC | 4 | -1.872 | -5.697 | -123.976 | 1.00 | 2.00 | CARH |
| ATOM | 3007 | H3  | BGLC | 4 | -1.148 | -4.884 | -123.932 | 1.00 | 0.00 | CARH |
| ATOM | 3008 | O3  | BGLC | 4 | -1.527 | -6.730 | -124.920 | 1.00 | 2.00 | CARH |
| ATOM | 3009 | HO3 | BGLC | 4 | -0.663 | -7.110 | -124.928 | 1.00 | 0.00 | CARH |
| ATOM | 3010 | C4  | BGLC | 4 | -3.157 | -5.002 | -124.394 | 1.00 | 2.00 | CARH |
| ATOM | 3011 | H4  | BGLC | 4 | -3.871 | -5.790 | -124.613 | 1.00 | 0.00 | CARH |
| ATOM | 3012 | O4  | BGLC | 4 | -3.094 | -4.348 | -125.623 | 1.00 | 2.00 | CARH |
| ATOM | 3013 | C6  | BGLC | 4 | -5.122 | -3.588 | -123.648 | 1.00 | 2.00 | CARH |
| ATOM | 3014 | H61 | BGLC | 4 | -5.644 | -4.494 | -124.119 | 1.00 | 0.00 | CARH |
| ATOM | 3015 | H62 | BGLC | 4 | -5.768 | -3.325 | -122.817 | 1.00 | 0.00 | CARH |
| ATOM | 3016 | O6  | BGLC | 4 | -5.067 | -2.640 | -124.699 | 1.00 | 2.00 | CARH |
| ATOM | 3017 | HO6 | BGLC | 4 | -4.483 | -1.893 | -124.613 | 1.00 | 0.00 | CARH |
| ATOM | 3018 | C1  | BGLC | 5 | -3.264 | -4.978 | -126.800 | 1.00 | 2.00 | CARH |
| ATOM | 3019 | H1  | BGLC | 5 | -3.934 | -5.824 | -126.701 | 1.00 | 0.00 | CARH |
| ATOM | 3020 | C5  | BGLC | 5 | -2.131 | -6.166 | -128.526 | 1.00 | 2.00 | CARH |
| ATOM | 3021 | H5  | BGLC | 5 | -2.857 | -6.997 | -128.411 | 1.00 | 0.00 | CARH |
| ATOM | 3022 | O5  | BGLC | 5 | -2.010 | -5.414 | -127.303 | 1.00 | 2.00 | CARH |



|      |      |     |      |   |        |                |      |      |      |
|------|------|-----|------|---|--------|----------------|------|------|------|
| ATOM | 3023 | C2  | BGLC | 5 | -3.886 | -3.981-127.786 | 1.00 | 2.00 | CARH |
| ATOM | 3024 | H2  | BGLC | 5 | -3.312 | -3.000-127.812 | 1.00 | 0.00 | CARH |
| ATOM | 3025 | O2  | BGLC | 5 | -5.181 | -3.692-127.253 | 1.00 | 2.00 | CARH |
| ATOM | 3026 | HO2 | BGLC | 5 | -5.447 | -2.777-127.243 | 1.00 | 0.00 | CARH |
| ATOM | 3027 | C3  | BGLC | 5 | -3.994 | -4.584-129.167 | 1.00 | 2.00 | CARH |
| ATOM | 3028 | H3  | BGLC | 5 | -4.718 | -5.397-129.119 | 1.00 | 0.00 | CARH |
| ATOM | 3029 | O3  | BGLC | 5 | -4.340 | -3.553-130.115 | 1.00 | 2.00 | CARH |
| ATOM | 3030 | HO3 | BGLC | 5 | -5.204 | -3.173-130.124 | 1.00 | 0.00 | CARH |
| ATOM | 3031 | C4  | BGLC | 5 | -2.710 | -5.281-129.583 | 1.00 | 2.00 | CARH |
| ATOM | 3032 | H4  | BGLC | 5 | -1.997 | -4.493-129.806 | 1.00 | 0.00 | CARH |
| ATOM | 3033 | O4  | BGLC | 5 | -2.773 | -5.940-130.810 | 1.00 | 2.00 | CARH |
| ATOM | 3034 | C6  | BGLC | 5 | -0.745 | -6.689-128.833 | 1.00 | 2.00 | CARH |
| ATOM | 3035 | H61 | BGLC | 5 | -0.224 | -5.785-129.309 | 1.00 | 0.00 | CARH |
| ATOM | 3036 | H62 | BGLC | 5 | -0.098 | -6.947-128.001 | 1.00 | 0.00 | CARH |
| ATOM | 3037 | O6  | BGLC | 5 | -0.801 | -7.642-129.881 | 1.00 | 2.00 | CARH |
| ATOM | 3038 | HO6 | BGLC | 5 | -1.384 | -8.389-129.791 | 1.00 | 0.00 | CARH |
| ATOM | 3039 | C1  | BGLC | 6 | -2.605 | -5.312-131.989 | 1.00 | 2.00 | CARH |
| ATOM | 3040 | H1  | BGLC | 6 | -1.937 | -4.465-131.892 | 1.00 | 0.00 | CARH |
| ATOM | 3041 | C5  | BGLC | 6 | -3.741 | -4.132-133.719 | 1.00 | 2.00 | CARH |
| ATOM | 3042 | H5  | BGLC | 6 | -3.015 | -3.300-133.609 | 1.00 | 0.00 | CARH |
| ATOM | 3043 | O5  | BGLC | 6 | -3.859 | -4.878-132.494 | 1.00 | 2.00 | CARH |
| ATOM | 3044 | C2  | BGLC | 6 | -1.984 | -6.314-132.972 | 1.00 | 2.00 | CARH |
| ATOM | 3045 | H2  | BGLC | 6 | -2.560 | -7.295-132.994 | 1.00 | 0.00 | CARH |
| ATOM | 3046 | O2  | BGLC | 6 | -0.689 | -6.602-132.439 | 1.00 | 2.00 | CARH |
| ATOM | 3047 | HO2 | BGLC | 6 | -0.423 | -7.517-132.426 | 1.00 | 0.00 | CARH |
| ATOM | 3048 | C3  | BGLC | 6 | -1.876 | -5.717-134.356 | 1.00 | 2.00 | CARH |
| ATOM | 3049 | H3  | BGLC | 6 | -1.153 | -4.903-134.312 | 1.00 | 0.00 | CARH |
| ATOM | 3050 | O3  | BGLC | 6 | -1.532 | -6.750-135.300 | 1.00 | 2.00 | CARH |
| ATOM | 3051 | HO3 | BGLC | 6 | -0.668 | -7.131-135.308 | 1.00 | 0.00 | CARH |
| ATOM | 3052 | C4  | BGLC | 6 | -3.161 | -5.023-134.774 | 1.00 | 2.00 | CARH |
| ATOM | 3053 | H4  | BGLC | 6 | -3.874 | -5.812-134.993 | 1.00 | 0.00 | CARH |
| ATOM | 3054 | O4  | BGLC | 6 | -3.099 | -4.369-136.003 | 1.00 | 2.00 | CARH |
| ATOM | 3055 | C6  | BGLC | 6 | -5.127 | -3.609-134.028 | 1.00 | 2.00 | CARH |
| ATOM | 3056 | H61 | BGLC | 6 | -5.649 | -4.514-134.500 | 1.00 | 0.00 | CARH |
| ATOM | 3057 | H62 | BGLC | 6 | -5.774 | -3.347-133.197 | 1.00 | 0.00 | CARH |
| ATOM | 3058 | O6  | BGLC | 6 | -5.071 | -2.661-135.079 | 1.00 | 2.00 | CARH |
| ATOM | 3059 | HO6 | BGLC | 6 | -4.487 | -1.914-134.993 | 1.00 | 0.00 | CARH |
| ATOM | 3060 | C1  | BGLC | 7 | -3.269 | -4.999-137.180 | 1.00 | 2.00 | CARH |
| ATOM | 3061 | H1  | BGLC | 7 | -3.939 | -5.845-137.081 | 1.00 | 0.00 | CARH |
| ATOM | 3062 | C5  | BGLC | 7 | -2.135 | -6.186-138.906 | 1.00 | 2.00 | CARH |
| ATOM | 3063 | H5  | BGLC | 7 | -2.862 | -7.016-138.793 | 1.00 | 0.00 | CARH |
| ATOM | 3064 | O5  | BGLC | 7 | -2.016 | -5.436-137.683 | 1.00 | 2.00 | CARH |
| ATOM | 3065 | C2  | BGLC | 7 | -3.890 | -4.002-138.166 | 1.00 | 2.00 | CARH |
| ATOM | 3066 | H2  | BGLC | 7 | -3.315 | -3.021-138.192 | 1.00 | 0.00 | CARH |
| ATOM | 3067 | O2  | BGLC | 7 | -5.185 | -3.712-137.633 | 1.00 | 2.00 | CARH |
| ATOM | 3068 | HO2 | BGLC | 7 | -5.451 | -2.797-137.623 | 1.00 | 0.00 | CARH |
| ATOM | 3069 | C3  | BGLC | 7 | -3.998 | -4.605-139.547 | 1.00 | 2.00 | CARH |
| ATOM | 3070 | H3  | BGLC | 7 | -4.722 | -5.418-139.499 | 1.00 | 0.00 | CARH |
| ATOM | 3071 | O3  | BGLC | 7 | -4.344 | -3.575-140.495 | 1.00 | 2.00 | CARH |
| ATOM | 3072 | HO3 | BGLC | 7 | -5.208 | -3.195-140.504 | 1.00 | 0.00 | CARH |
| ATOM | 3073 | C4  | BGLC | 7 | -2.714 | -5.302-139.963 | 1.00 | 2.00 | CARH |
| ATOM | 3074 | H4  | BGLC | 7 | -2.001 | -4.514-140.186 | 1.00 | 0.00 | CARH |
| ATOM | 3075 | O4  | BGLC | 7 | -2.777 | -5.960-141.190 | 1.00 | 2.00 | CARH |
| ATOM | 3076 | C6  | BGLC | 7 | -0.749 | -6.711-139.213 | 1.00 | 2.00 | CARH |

|      |      |     |      |    |        |                |      |      |      |
|------|------|-----|------|----|--------|----------------|------|------|------|
| ATOM | 3077 | H61 | BGLC | 7  | -0.226 | -5.808-139.688 | 1.00 | 0.00 | CARH |
| ATOM | 3078 | H62 | BGLC | 7  | -0.103 | -6.971-138.381 | 1.00 | 0.00 | CARH |
| ATOM | 3079 | O6  | BGLC | 7  | -0.806 | -7.662-140.261 | 1.00 | 2.00 | CARH |
| ATOM | 3080 | HO6 | BGLC | 7  | -1.391 | -8.408-140.172 | 1.00 | 0.00 | CARH |
| ATOM | 3081 | C1  | BGLC | 8  | -2.610 | -5.334-142.369 | 1.00 | 2.00 | CARH |
| ATOM | 3082 | H1  | BGLC | 8  | -1.941 | -4.487-142.274 | 1.00 | 0.00 | CARH |
| ATOM | 3083 | C5  | BGLC | 8  | -3.744 | -4.153-144.099 | 1.00 | 2.00 | CARH |
| ATOM | 3084 | H5  | BGLC | 8  | -3.018 | -3.322-143.988 | 1.00 | 0.00 | CARH |
| ATOM | 3085 | O5  | BGLC | 8  | -3.864 | -4.899-142.874 | 1.00 | 2.00 | CARH |
| ATOM | 3086 | C2  | BGLC | 8  | -1.988 | -6.336-143.352 | 1.00 | 2.00 | CARH |
| ATOM | 3087 | H2  | BGLC | 8  | -2.562 | -7.318-143.375 | 1.00 | 0.00 | CARH |
| ATOM | 3088 | O2  | BGLC | 8  | -0.692 | -6.622-142.819 | 1.00 | 2.00 | CARH |
| ATOM | 3089 | HO2 | BGLC | 8  | -0.425 | -7.536-142.805 | 1.00 | 0.00 | CARH |
| ATOM | 3090 | C3  | BGLC | 8  | -1.881 | -5.737-144.736 | 1.00 | 2.00 | CARH |
| ATOM | 3091 | H3  | BGLC | 8  | -1.157 | -4.924-144.692 | 1.00 | 0.00 | CARH |
| ATOM | 3092 | O3  | BGLC | 8  | -1.536 | -6.771-145.680 | 1.00 | 2.00 | CARH |
| ATOM | 3093 | HO3 | BGLC | 8  | -0.672 | -7.151-145.688 | 1.00 | 0.00 | CARH |
| ATOM | 3094 | C4  | BGLC | 8  | -3.166 | -5.042-145.154 | 1.00 | 2.00 | CARH |
| ATOM | 3095 | H4  | BGLC | 8  | -3.880 | -5.830-145.374 | 1.00 | 0.00 | CARH |
| ATOM | 3096 | O4  | BGLC | 8  | -3.102 | -4.389-146.383 | 1.00 | 2.00 | CARH |
| ATOM | 3097 | C6  | BGLC | 8  | -5.131 | -3.630-144.408 | 1.00 | 2.00 | CARH |
| ATOM | 3098 | H61 | BGLC | 8  | -5.653 | -4.535-144.880 | 1.00 | 0.00 | CARH |
| ATOM | 3099 | H62 | BGLC | 8  | -5.778 | -3.368-143.577 | 1.00 | 0.00 | CARH |
| ATOM | 3100 | O6  | BGLC | 8  | -5.075 | -2.682-145.459 | 1.00 | 2.00 | CARH |
| ATOM | 3101 | HO6 | BGLC | 8  | -4.491 | -1.935-145.373 | 1.00 | 0.00 | CARH |
| ATOM | 3102 | C1  | BGLC | 9  | -3.273 | -5.020-147.560 | 1.00 | 2.00 | CARH |
| ATOM | 3103 | H1  | BGLC | 9  | -3.943 | -5.866-147.460 | 1.00 | 0.00 | CARH |
| ATOM | 3104 | C5  | BGLC | 9  | -2.140 | -6.207-149.286 | 1.00 | 2.00 | CARH |
| ATOM | 3105 | H5  | BGLC | 9  | -2.867 | -7.037-149.172 | 1.00 | 0.00 | CARH |
| ATOM | 3106 | O5  | BGLC | 9  | -2.019 | -5.456-148.063 | 1.00 | 2.00 | CARH |
| ATOM | 3107 | C2  | BGLC | 9  | -3.895 | -4.022-148.546 | 1.00 | 2.00 | CARH |
| ATOM | 3108 | H2  | BGLC | 9  | -3.320 | -3.041-148.572 | 1.00 | 0.00 | CARH |
| ATOM | 3109 | O2  | BGLC | 9  | -5.190 | -3.732-148.013 | 1.00 | 2.00 | CARH |
| ATOM | 3110 | HO2 | BGLC | 9  | -5.456 | -2.817-148.003 | 1.00 | 0.00 | CARH |
| ATOM | 3111 | C3  | BGLC | 9  | -4.003 | -4.625-149.927 | 1.00 | 2.00 | CARH |
| ATOM | 3112 | H3  | BGLC | 9  | -4.727 | -5.438-149.879 | 1.00 | 0.00 | CARH |
| ATOM | 3113 | O3  | BGLC | 9  | -4.349 | -3.596-150.875 | 1.00 | 2.00 | CARH |
| ATOM | 3114 | HO3 | BGLC | 9  | -5.213 | -3.217-150.884 | 1.00 | 0.00 | CARH |
| ATOM | 3115 | C4  | BGLC | 9  | -2.718 | -5.322-150.343 | 1.00 | 2.00 | CARH |
| ATOM | 3116 | H4  | BGLC | 9  | -2.004 | -4.535-150.566 | 1.00 | 0.00 | CARH |
| ATOM | 3117 | O4  | BGLC | 9  | -2.782 | -5.981-151.570 | 1.00 | 2.00 | CARH |
| ATOM | 3118 | C6  | BGLC | 9  | -0.754 | -6.732-149.593 | 1.00 | 2.00 | CARH |
| ATOM | 3119 | H61 | BGLC | 9  | -0.231 | -5.828-150.067 | 1.00 | 0.00 | CARH |
| ATOM | 3120 | H62 | BGLC | 9  | -0.108 | -6.992-148.761 | 1.00 | 0.00 | CARH |
| ATOM | 3121 | O6  | BGLC | 9  | -0.810 | -7.683-150.641 | 1.00 | 2.00 | CARH |
| ATOM | 3122 | HO6 | BGLC | 9  | -1.394 | -8.429-150.553 | 1.00 | 0.00 | CARH |
| ATOM | 3123 | C1  | BGLC | 10 | -2.613 | -5.354-152.749 | 1.00 | 2.00 | CARH |
| ATOM | 3124 | H1  | BGLC | 10 | -1.944 | -4.507-152.652 | 1.00 | 0.00 | CARH |
| ATOM | 3125 | C5  | BGLC | 10 | -3.749 | -4.173-154.479 | 1.00 | 2.00 | CARH |
| ATOM | 3126 | H5  | BGLC | 10 | -3.023 | -3.342-154.368 | 1.00 | 0.00 | CARH |
| ATOM | 3127 | O5  | BGLC | 10 | -3.868 | -4.920-153.254 | 1.00 | 2.00 | CARH |
| ATOM | 3128 | C2  | BGLC | 10 | -1.992 | -6.356-153.732 | 1.00 | 2.00 | CARH |
| ATOM | 3129 | H2  | BGLC | 10 | -2.566 | -7.338-153.754 | 1.00 | 0.00 | CARH |
| ATOM | 3130 | O2  | BGLC | 10 | -0.697 | -6.643-153.199 | 1.00 | 2.00 | CARH |

|      |      |     |      |    |        |        |          |      |      |      |
|------|------|-----|------|----|--------|--------|----------|------|------|------|
| ATOM | 3131 | HO2 | BGLC | 10 | -0.431 | -7.558 | -153.185 | 1.00 | 0.00 | CARH |
| ATOM | 3132 | C3  | BGLC | 10 | -1.886 | -5.758 | -155.116 | 1.00 | 2.00 | CARH |
| ATOM | 3133 | H3  | BGLC | 10 | -1.162 | -4.945 | -155.072 | 1.00 | 0.00 | CARH |
| ATOM | 3134 | O3  | BGLC | 10 | -1.541 | -6.792 | -156.060 | 1.00 | 2.00 | CARH |
| ATOM | 3135 | HO3 | BGLC | 10 | -0.677 | -7.171 | -156.068 | 1.00 | 0.00 | CARH |
| ATOM | 3136 | C4  | BGLC | 10 | -3.170 | -5.064 | -155.534 | 1.00 | 2.00 | CARH |
| ATOM | 3137 | H4  | BGLC | 10 | -3.884 | -5.852 | -155.753 | 1.00 | 0.00 | CARH |
| ATOM | 3138 | O4  | BGLC | 10 | -3.107 | -4.411 | -156.763 | 1.00 | 2.00 | CARH |
| ATOM | 3139 | C6  | BGLC | 10 | -5.134 | -3.651 | -154.787 | 1.00 | 2.00 | CARH |
| ATOM | 3140 | H61 | BGLC | 10 | -5.656 | -4.557 | -155.258 | 1.00 | 0.00 | CARH |
| ATOM | 3141 | H62 | BGLC | 10 | -5.780 | -3.389 | -153.955 | 1.00 | 0.00 | CARH |
| ATOM | 3142 | O6  | BGLC | 10 | -5.079 | -2.703 | -155.839 | 1.00 | 2.00 | CARH |
| ATOM | 3143 | HO6 | BGLC | 10 | -4.495 | -1.956 | -155.753 | 1.00 | 0.00 | CARH |
| ATOM | 3144 | C1  | BGLC | 11 | -3.278 | -5.040 | -157.940 | 1.00 | 2.00 | CARH |
| ATOM | 3145 | H1  | BGLC | 11 | -3.949 | -5.885 | -157.841 | 1.00 | 0.00 | CARH |
| ATOM | 3146 | C5  | BGLC | 11 | -2.144 | -6.227 | -159.666 | 1.00 | 2.00 | CARH |
| ATOM | 3147 | H5  | BGLC | 11 | -2.870 | -7.058 | -159.553 | 1.00 | 0.00 | CARH |
| ATOM | 3148 | O5  | BGLC | 11 | -2.024 | -5.477 | -158.443 | 1.00 | 2.00 | CARH |
| ATOM | 3149 | C2  | BGLC | 11 | -3.899 | -4.042 | -158.926 | 1.00 | 2.00 | CARH |
| ATOM | 3150 | H2  | BGLC | 11 | -3.325 | -3.060 | -158.954 | 1.00 | 0.00 | CARH |
| ATOM | 3151 | O2  | BGLC | 11 | -5.194 | -3.753 | -158.393 | 1.00 | 2.00 | CARH |
| ATOM | 3152 | HO2 | BGLC | 11 | -5.460 | -2.838 | -158.383 | 1.00 | 0.00 | CARH |
| ATOM | 3153 | C3  | BGLC | 11 | -4.008 | -4.647 | -160.307 | 1.00 | 2.00 | CARH |
| ATOM | 3154 | H3  | BGLC | 11 | -4.731 | -5.461 | -160.260 | 1.00 | 0.00 | CARH |
| ATOM | 3155 | O3  | BGLC | 11 | -4.354 | -3.616 | -161.255 | 1.00 | 2.00 | CARH |
| ATOM | 3156 | HO3 | BGLC | 11 | -5.218 | -3.236 | -161.263 | 1.00 | 0.00 | CARH |
| ATOM | 3157 | C4  | BGLC | 11 | -2.723 | -5.342 | -160.723 | 1.00 | 2.00 | CARH |
| ATOM | 3158 | H4  | BGLC | 11 | -2.009 | -4.555 | -160.946 | 1.00 | 0.00 | CARH |
| ATOM | 3159 | O4  | BGLC | 11 | -2.787 | -6.003 | -161.950 | 1.00 | 2.00 | CARH |
| ATOM | 3160 | C6  | BGLC | 11 | -0.758 | -6.751 | -159.973 | 1.00 | 2.00 | CARH |
| ATOM | 3161 | H61 | BGLC | 11 | -0.236 | -5.848 | -160.450 | 1.00 | 0.00 | CARH |
| ATOM | 3162 | H62 | BGLC | 11 | -0.111 | -7.009 | -159.141 | 1.00 | 0.00 | CARH |
| ATOM | 3163 | O6  | BGLC | 11 | -0.815 | -7.705 | -161.021 | 1.00 | 2.00 | CARH |
| ATOM | 3164 | HO6 | BGLC | 11 | -1.399 | -8.452 | -160.931 | 1.00 | 0.00 | CARH |
| ATOM | 3165 | C1  | BGLC | 12 | -2.618 | -5.375 | -163.129 | 1.00 | 2.00 | CARH |
| ATOM | 3166 | H1  | BGLC | 12 | -1.949 | -4.528 | -163.032 | 1.00 | 0.00 | CARH |
| ATOM | 3167 | C5  | BGLC | 12 | -3.753 | -4.195 | -164.859 | 1.00 | 2.00 | CARH |
| ATOM | 3168 | H5  | BGLC | 12 | -3.026 | -3.365 | -164.749 | 1.00 | 0.00 | CARH |
| ATOM | 3169 | O5  | BGLC | 12 | -3.873 | -4.941 | -163.633 | 1.00 | 2.00 | CARH |
| ATOM | 3170 | C2  | BGLC | 12 | -1.997 | -6.377 | -164.112 | 1.00 | 2.00 | CARH |
| ATOM | 3171 | H2  | BGLC | 12 | -2.571 | -7.359 | -164.135 | 1.00 | 0.00 | CARH |
| ATOM | 3172 | O2  | BGLC | 12 | -0.701 | -6.664 | -163.579 | 1.00 | 2.00 | CARH |
| ATOM | 3173 | HO2 | BGLC | 12 | -0.435 | -7.579 | -163.565 | 1.00 | 0.00 | CARH |
| ATOM | 3174 | C3  | BGLC | 12 | -1.889 | -5.778 | -165.496 | 1.00 | 2.00 | CARH |
| ATOM | 3175 | H3  | BGLC | 12 | -1.166 | -4.964 | -165.454 | 1.00 | 0.00 | CARH |
| ATOM | 3176 | O3  | BGLC | 12 | -1.546 | -6.812 | -166.440 | 1.00 | 2.00 | CARH |
| ATOM | 3177 | HO3 | BGLC | 12 | -0.682 | -7.193 | -166.448 | 1.00 | 0.00 | CARH |
| ATOM | 3178 | C4  | BGLC | 12 | -3.175 | -5.084 | -165.913 | 1.00 | 2.00 | CARH |
| ATOM | 3179 | H4  | BGLC | 12 | -3.889 | -5.872 | -166.133 | 1.00 | 0.00 | CARH |
| ATOM | 3180 | O4  | BGLC | 12 | -3.111 | -4.431 | -167.143 | 1.00 | 2.00 | CARH |
| ATOM | 3181 | C6  | BGLC | 12 | -5.139 | -3.671 | -165.167 | 1.00 | 2.00 | CARH |
| ATOM | 3182 | H61 | BGLC | 12 | -5.662 | -4.577 | -165.637 | 1.00 | 0.00 | CARH |
| ATOM | 3183 | H62 | BGLC | 12 | -5.785 | -3.407 | -164.335 | 1.00 | 0.00 | CARH |
| ATOM | 3184 | O6  | BGLC | 12 | -5.084 | -2.724 | -166.219 | 1.00 | 2.00 | CARH |

|      |      |     |      |    |        |        |          |      |      |      |
|------|------|-----|------|----|--------|--------|----------|------|------|------|
| ATOM | 3185 | HO6 | BGLC | 12 | -4.500 | -1.977 | -166.134 | 1.00 | 0.00 | CARH |
| ATOM | 3186 | C1  | BGLC | 13 | -3.282 | -5.061 | -168.320 | 1.00 | 2.00 | CARH |
| ATOM | 3187 | H1  | BGLC | 13 | -3.952 | -5.907 | -168.220 | 1.00 | 0.00 | CARH |
| ATOM | 3188 | C5  | BGLC | 13 | -2.149 | -6.249 | -170.046 | 1.00 | 2.00 | CARH |
| ATOM | 3189 | H5  | BGLC | 13 | -2.875 | -7.080 | -169.931 | 1.00 | 0.00 | CARH |
| ATOM | 3190 | O5  | BGLC | 13 | -2.028 | -5.497 | -168.823 | 1.00 | 2.00 | CARH |
| ATOM | 3191 | C2  | BGLC | 13 | -3.904 | -4.064 | -169.306 | 1.00 | 2.00 | CARH |
| ATOM | 3192 | H2  | BGLC | 13 | -3.329 | -3.083 | -169.332 | 1.00 | 0.00 | CARH |
| ATOM | 3193 | O2  | BGLC | 13 | -5.199 | -3.774 | -168.773 | 1.00 | 2.00 | CARH |
| ATOM | 3194 | HO2 | BGLC | 13 | -5.465 | -2.859 | -168.764 | 1.00 | 0.00 | CARH |
| ATOM | 3195 | C3  | BGLC | 13 | -4.012 | -4.667 | -170.687 | 1.00 | 2.00 | CARH |
| ATOM | 3196 | H3  | BGLC | 13 | -4.736 | -5.480 | -170.639 | 1.00 | 0.00 | CARH |
| ATOM | 3197 | O3  | BGLC | 13 | -4.359 | -3.636 | -171.635 | 1.00 | 2.00 | CARH |
| ATOM | 3198 | HO3 | BGLC | 13 | -5.224 | -3.257 | -171.643 | 1.00 | 0.00 | CARH |
| ATOM | 3199 | C4  | BGLC | 13 | -2.728 | -5.364 | -171.103 | 1.00 | 2.00 | CARH |
| ATOM | 3200 | H4  | BGLC | 13 | -2.015 | -4.576 | -171.325 | 1.00 | 0.00 | CARH |
| ATOM | 3201 | O4  | BGLC | 13 | -2.791 | -6.022 | -172.330 | 1.00 | 2.00 | CARH |
| ATOM | 3202 | C6  | BGLC | 13 | -0.762 | -6.773 | -170.353 | 1.00 | 2.00 | CARH |
| ATOM | 3203 | H61 | BGLC | 13 | -0.239 | -5.870 | -170.829 | 1.00 | 0.00 | CARH |
| ATOM | 3204 | H62 | BGLC | 13 | -0.115 | -7.032 | -169.521 | 1.00 | 0.00 | CARH |
| ATOM | 3205 | O6  | BGLC | 13 | -0.820 | -7.725 | -171.401 | 1.00 | 2.00 | CARH |
| ATOM | 3206 | HO6 | BGLC | 13 | -1.404 | -8.471 | -171.311 | 1.00 | 0.00 | CARH |
| ATOM | 3207 | C1  | BGLC | 14 | -2.623 | -5.396 | -173.509 | 1.00 | 2.00 | CARH |
| ATOM | 3208 | H1  | BGLC | 14 | -1.953 | -4.549 | -173.414 | 1.00 | 0.00 | CARH |
| ATOM | 3209 | C5  | BGLC | 14 | -3.758 | -4.215 | -175.239 | 1.00 | 2.00 | CARH |
| ATOM | 3210 | H5  | BGLC | 14 | -3.031 | -3.384 | -175.129 | 1.00 | 0.00 | CARH |
| ATOM | 3211 | O5  | BGLC | 14 | -3.878 | -4.961 | -174.013 | 1.00 | 2.00 | CARH |
| ATOM | 3212 | C2  | BGLC | 14 | -2.001 | -6.398 | -174.492 | 1.00 | 2.00 | CARH |
| ATOM | 3213 | H2  | BGLC | 14 | -2.576 | -7.379 | -174.514 | 1.00 | 0.00 | CARH |
| ATOM | 3214 | O2  | BGLC | 14 | -0.707 | -6.685 | -173.959 | 1.00 | 2.00 | CARH |
| ATOM | 3215 | HO2 | BGLC | 14 | -0.441 | -7.600 | -173.946 | 1.00 | 0.00 | CARH |
| ATOM | 3216 | C3  | BGLC | 14 | -1.894 | -5.800 | -175.876 | 1.00 | 2.00 | CARH |
| ATOM | 3217 | H3  | BGLC | 14 | -1.170 | -4.987 | -175.832 | 1.00 | 0.00 | CARH |
| ATOM | 3218 | O3  | BGLC | 14 | -1.549 | -6.834 | -176.820 | 1.00 | 2.00 | CARH |
| ATOM | 3219 | HO3 | BGLC | 14 | -0.685 | -7.214 | -176.828 | 1.00 | 0.00 | CARH |
| ATOM | 3220 | C4  | BGLC | 14 | -3.178 | -5.105 | -176.293 | 1.00 | 2.00 | CARH |
| ATOM | 3221 | H4  | BGLC | 14 | -3.891 | -5.894 | -176.512 | 1.00 | 0.00 | CARH |
| ATOM | 3222 | O4  | BGLC | 14 | -3.116 | -4.451 | -177.523 | 1.00 | 2.00 | CARH |
| ATOM | 3223 | C6  | BGLC | 14 | -5.144 | -3.692 | -175.547 | 1.00 | 2.00 | CARH |
| ATOM | 3224 | H61 | BGLC | 14 | -5.667 | -4.598 | -176.018 | 1.00 | 0.00 | CARH |
| ATOM | 3225 | H62 | BGLC | 14 | -5.790 | -3.429 | -174.715 | 1.00 | 0.00 | CARH |
| ATOM | 3226 | O6  | BGLC | 14 | -5.089 | -2.744 | -176.599 | 1.00 | 2.00 | CARH |
| ATOM | 3227 | HO6 | BGLC | 14 | -4.505 | -1.997 | -176.514 | 1.00 | 0.00 | CARH |
| ATOM | 3228 | C1  | BGLC | 15 | -3.287 | -5.081 | -178.699 | 1.00 | 2.00 | CARH |
| ATOM | 3229 | H1  | BGLC | 15 | -3.957 | -5.927 | -178.599 | 1.00 | 0.00 | CARH |
| ATOM | 3230 | C5  | BGLC | 15 | -2.154 | -6.269 | -180.426 | 1.00 | 2.00 | CARH |
| ATOM | 3231 | H5  | BGLC | 15 | -2.880 | -7.100 | -180.312 | 1.00 | 0.00 | CARH |
| ATOM | 3232 | O5  | BGLC | 15 | -2.033 | -5.518 | -179.203 | 1.00 | 2.00 | CARH |
| ATOM | 3233 | C2  | BGLC | 15 | -3.909 | -4.084 | -179.686 | 1.00 | 2.00 | CARH |
| ATOM | 3234 | H2  | BGLC | 15 | -3.335 | -3.103 | -179.712 | 1.00 | 0.00 | CARH |
| ATOM | 3235 | O2  | BGLC | 15 | -5.204 | -3.795 | -179.153 | 1.00 | 2.00 | CARH |
| ATOM | 3236 | HO2 | BGLC | 15 | -5.470 | -2.880 | -179.143 | 1.00 | 0.00 | CARH |
| ATOM | 3237 | C3  | BGLC | 15 | -4.017 | -4.687 | -181.067 | 1.00 | 2.00 | CARH |
| ATOM | 3238 | H3  | BGLC | 15 | -4.741 | -5.500 | -181.019 | 1.00 | 0.00 | CARH |

|      |      |     |      |    |        |                |      |      |      |
|------|------|-----|------|----|--------|----------------|------|------|------|
| ATOM | 3239 | O3  | BGLC | 15 | -4.363 | -3.657-182.015 | 1.00 | 2.00 | CARH |
| ATOM | 3240 | HO3 | BGLC | 15 | -5.227 | -3.277-182.024 | 1.00 | 0.00 | CARH |
| ATOM | 3241 | C4  | BGLC | 15 | -2.732 | -5.384-181.483 | 1.00 | 2.00 | CARH |
| ATOM | 3242 | H4  | BGLC | 15 | -2.018 | -4.597-181.706 | 1.00 | 0.00 | CARH |
| ATOM | 3243 | O4  | BGLC | 15 | -2.796 | -6.043-182.710 | 1.00 | 2.00 | CARH |
| ATOM | 3244 | C6  | BGLC | 15 | -0.767 | -6.793-180.733 | 1.00 | 2.00 | CARH |
| ATOM | 3245 | H61 | BGLC | 15 | -0.245 | -5.890-181.209 | 1.00 | 0.00 | CARH |
| ATOM | 3246 | H62 | BGLC | 15 | -0.120 | -7.052-179.901 | 1.00 | 0.00 | CARH |
| ATOM | 3247 | O6  | BGLC | 15 | -0.823 | -7.746-181.781 | 1.00 | 2.00 | CARH |
| ATOM | 3248 | HO6 | BGLC | 15 | -1.407 | -8.493-181.691 | 1.00 | 0.00 | CARH |
| ATOM | 3249 | C1  | BGLC | 16 | -2.628 | -5.416-183.889 | 1.00 | 2.00 | CARH |
| ATOM | 3250 | H1  | BGLC | 16 | -1.959 | -4.569-183.793 | 1.00 | 0.00 | CARH |
| ATOM | 3251 | C5  | BGLC | 16 | -3.762 | -4.236-185.619 | 1.00 | 2.00 | CARH |
| ATOM | 3252 | H5  | BGLC | 16 | -3.035 | -3.405-185.509 | 1.00 | 0.00 | CARH |
| ATOM | 3253 | O5  | BGLC | 16 | -3.881 | -4.982-184.393 | 1.00 | 2.00 | CARH |
| ATOM | 3254 | C2  | BGLC | 16 | -2.006 | -6.418-184.872 | 1.00 | 2.00 | CARH |
| ATOM | 3255 | H2  | BGLC | 16 | -2.581 | -7.400-184.894 | 1.00 | 0.00 | CARH |
| ATOM | 3256 | O2  | BGLC | 16 | -0.711 | -6.705-184.339 | 1.00 | 2.00 | CARH |
| ATOM | 3257 | HO2 | BGLC | 16 | -0.445 | -7.620-184.326 | 1.00 | 0.00 | CARH |
| ATOM | 3258 | C3  | BGLC | 16 | -1.899 | -5.820-186.256 | 1.00 | 2.00 | CARH |
| ATOM | 3259 | H3  | BGLC | 16 | -1.176 | -5.006-186.213 | 1.00 | 0.00 | CARH |
| ATOM | 3260 | O3  | BGLC | 16 | -1.554 | -6.854-187.200 | 1.00 | 2.00 | CARH |
| ATOM | 3261 | HO3 | BGLC | 16 | -0.690 | -7.234-187.208 | 1.00 | 0.00 | CARH |
| ATOM | 3262 | C4  | BGLC | 16 | -3.183 | -5.127-186.673 | 1.00 | 2.00 | CARH |
| ATOM | 3263 | H4  | BGLC | 16 | -3.896 | -5.916-186.892 | 1.00 | 0.00 | CARH |
| ATOM | 3264 | O4  | BGLC | 16 | -3.121 | -4.472-187.903 | 1.00 | 2.00 | CARH |
| ATOM | 3265 | C6  | BGLC | 16 | -5.149 | -3.712-185.927 | 1.00 | 2.00 | CARH |
| ATOM | 3266 | H61 | BGLC | 16 | -5.672 | -4.617-186.398 | 1.00 | 0.00 | CARH |
| ATOM | 3267 | H62 | BGLC | 16 | -5.795 | -3.449-185.095 | 1.00 | 0.00 | CARH |
| ATOM | 3268 | O6  | BGLC | 16 | -5.093 | -2.764-186.979 | 1.00 | 2.00 | CARH |
| ATOM | 3269 | HO6 | BGLC | 16 | -4.508 | -2.017-186.893 | 1.00 | 0.00 | CARH |
| ATOM | 3270 | C1  | BGLC | 17 | -3.291 | -5.102-189.079 | 1.00 | 2.00 | CARH |
| ATOM | 3271 | H1  | BGLC | 17 | -3.961 | -5.948-188.980 | 1.00 | 0.00 | CARH |
| ATOM | 3272 | C5  | BGLC | 17 | -2.158 | -6.290-190.806 | 1.00 | 2.00 | CARH |
| ATOM | 3273 | H5  | BGLC | 17 | -2.884 | -7.121-190.692 | 1.00 | 0.00 | CARH |
| ATOM | 3274 | O5  | BGLC | 17 | -2.038 | -5.539-189.583 | 1.00 | 2.00 | CARH |
| ATOM | 3275 | C2  | BGLC | 17 | -3.912 | -4.105-190.066 | 1.00 | 2.00 | CARH |
| ATOM | 3276 | H2  | BGLC | 17 | -3.337 | -3.124-190.093 | 1.00 | 0.00 | CARH |
| ATOM | 3277 | O2  | BGLC | 17 | -5.207 | -3.816-189.533 | 1.00 | 2.00 | CARH |
| ATOM | 3278 | HO2 | BGLC | 17 | -5.473 | -2.901-189.523 | 1.00 | 0.00 | CARH |
| ATOM | 3279 | C3  | BGLC | 17 | -4.021 | -4.708-191.447 | 1.00 | 2.00 | CARH |
| ATOM | 3280 | H3  | BGLC | 17 | -4.745 | -5.521-191.399 | 1.00 | 0.00 | CARH |
| ATOM | 3281 | O3  | BGLC | 17 | -4.366 | -3.678-192.395 | 1.00 | 2.00 | CARH |
| ATOM | 3282 | HO3 | BGLC | 17 | -5.230 | -3.297-192.404 | 1.00 | 0.00 | CARH |
| ATOM | 3283 | C4  | BGLC | 17 | -2.737 | -5.405-191.863 | 1.00 | 2.00 | CARH |
| ATOM | 3284 | H4  | BGLC | 17 | -2.024 | -4.617-192.085 | 1.00 | 0.00 | CARH |
| ATOM | 3285 | O4  | BGLC | 17 | -2.799 | -6.063-193.090 | 1.00 | 2.00 | CARH |
| ATOM | 3286 | C6  | BGLC | 17 | -0.771 | -6.814-191.113 | 1.00 | 2.00 | CARH |
| ATOM | 3287 | H61 | BGLC | 17 | -0.249 | -5.911-191.589 | 1.00 | 0.00 | CARH |
| ATOM | 3288 | H62 | BGLC | 17 | -0.124 | -7.073-190.281 | 1.00 | 0.00 | CARH |
| ATOM | 3289 | O6  | BGLC | 17 | -0.828 | -7.766-192.161 | 1.00 | 2.00 | CARH |
| ATOM | 3290 | HO6 | BGLC | 17 | -1.412 | -8.513-192.072 | 1.00 | 0.00 | CARH |
| ATOM | 3291 | C1  | BGLC | 18 | -2.632 | -5.438-194.269 | 1.00 | 2.00 | CARH |
| ATOM | 3292 | H1  | BGLC | 18 | -1.962 | -4.591-194.175 | 1.00 | 0.00 | CARH |

|      |      |     |      |    |        |                |      |      |      |
|------|------|-----|------|----|--------|----------------|------|------|------|
| ATOM | 3293 | C5  | BGLC | 18 | -3.766 | -4.257-195.999 | 1.00 | 2.00 | CARH |
| ATOM | 3294 | H5  | BGLC | 18 | -3.039 | -3.426-195.889 | 1.00 | 0.00 | CARH |
| ATOM | 3295 | O5  | BGLC | 18 | -3.886 | -5.003-194.773 | 1.00 | 2.00 | CARH |
| ATOM | 3296 | C2  | BGLC | 18 | -2.010 | -6.440-195.252 | 1.00 | 2.00 | CARH |
| ATOM | 3297 | H2  | BGLC | 18 | -2.584 | -7.422-195.275 | 1.00 | 0.00 | CARH |
| ATOM | 3298 | O2  | BGLC | 18 | -0.714 | -6.726-194.719 | 1.00 | 2.00 | CARH |
| ATOM | 3299 | HO2 | BGLC | 18 | -0.447 | -7.640-194.705 | 1.00 | 0.00 | CARH |
| ATOM | 3300 | C3  | BGLC | 18 | -1.903 | -5.841-196.636 | 1.00 | 2.00 | CARH |
| ATOM | 3301 | H3  | BGLC | 18 | -1.180 | -5.027-196.592 | 1.00 | 0.00 | CARH |
| ATOM | 3302 | O3  | BGLC | 18 | -1.558 | -6.874-197.580 | 1.00 | 2.00 | CARH |
| ATOM | 3303 | HO3 | BGLC | 18 | -0.694 | -7.254-197.588 | 1.00 | 0.00 | CARH |
| ATOM | 3304 | C4  | BGLC | 18 | -3.188 | -5.147-197.053 | 1.00 | 2.00 | CARH |
| ATOM | 3305 | H4  | BGLC | 18 | -3.902 | -5.935-197.272 | 1.00 | 0.00 | CARH |
| ATOM | 3306 | O4  | BGLC | 18 | -3.125 | -4.492-198.283 | 1.00 | 2.00 | CARH |
| ATOM | 3307 | C6  | BGLC | 18 | -5.153 | -3.734-196.307 | 1.00 | 2.00 | CARH |
| ATOM | 3308 | H61 | BGLC | 18 | -5.675 | -4.639-196.779 | 1.00 | 0.00 | CARH |
| ATOM | 3309 | H62 | BGLC | 18 | -5.799 | -3.472-195.475 | 1.00 | 0.00 | CARH |
| ATOM | 3310 | O6  | BGLC | 18 | -5.098 | -2.785-197.359 | 1.00 | 2.00 | CARH |
| ATOM | 3311 | HO6 | BGLC | 18 | -4.514 | -2.038-197.273 | 1.00 | 0.00 | CARH |
| ATOM | 3312 | C1  | BGLC | 19 | -3.296 | -5.123-199.459 | 1.00 | 2.00 | CARH |
| ATOM | 3313 | H1  | BGLC | 19 | -3.966 | -5.969-199.358 | 1.00 | 0.00 | CARH |
| ATOM | 3314 | C5  | BGLC | 19 | -2.162 | -6.311-201.186 | 1.00 | 2.00 | CARH |
| ATOM | 3315 | H5  | BGLC | 19 | -2.889 | -7.141-201.072 | 1.00 | 0.00 | CARH |
| ATOM | 3316 | O5  | BGLC | 19 | -2.041 | -5.560-199.963 | 1.00 | 2.00 | CARH |
| ATOM | 3317 | C2  | BGLC | 19 | -3.917 | -4.126-200.446 | 1.00 | 2.00 | CARH |
| ATOM | 3318 | H2  | BGLC | 19 | -3.341 | -3.145-200.472 | 1.00 | 0.00 | CARH |
| ATOM | 3319 | O2  | BGLC | 19 | -5.212 | -3.836-199.913 | 1.00 | 2.00 | CARH |
| ATOM | 3320 | HO2 | BGLC | 19 | -5.478 | -2.921-199.904 | 1.00 | 0.00 | CARH |
| ATOM | 3321 | C3  | BGLC | 19 | -4.026 | -4.728-201.827 | 1.00 | 2.00 | CARH |
| ATOM | 3322 | H3  | BGLC | 19 | -4.750 | -5.541-201.779 | 1.00 | 0.00 | CARH |
| ATOM | 3323 | O3  | BGLC | 19 | -4.372 | -3.699-202.775 | 1.00 | 2.00 | CARH |
| ATOM | 3324 | HO3 | BGLC | 19 | -5.236 | -3.319-202.784 | 1.00 | 0.00 | CARH |
| ATOM | 3325 | C4  | BGLC | 19 | -2.741 | -5.425-202.243 | 1.00 | 2.00 | CARH |
| ATOM | 3326 | H4  | BGLC | 19 | -2.027 | -4.638-202.465 | 1.00 | 0.00 | CARH |
| ATOM | 3327 | O4  | BGLC | 19 | -2.804 | -6.085-203.470 | 1.00 | 2.00 | CARH |
| ATOM | 3328 | C6  | BGLC | 19 | -0.776 | -6.836-201.493 | 1.00 | 2.00 | CARH |
| ATOM | 3329 | H61 | BGLC | 19 | -0.253 | -5.933-201.968 | 1.00 | 0.00 | CARH |
| ATOM | 3330 | H62 | BGLC | 19 | -0.130 | -7.096-200.661 | 1.00 | 0.00 | CARH |
| ATOM | 3331 | O6  | BGLC | 19 | -0.833 | -7.787-202.541 | 1.00 | 2.00 | CARH |
| ATOM | 3332 | HO6 | BGLC | 19 | -1.418 | -8.533-202.452 | 1.00 | 0.00 | CARH |
| ATOM | 3333 | C1  | BGLC | 20 | -2.635 | -5.458-204.649 | 1.00 | 2.00 | CARH |
| ATOM | 3334 | H1  | BGLC | 20 | -1.965 | -4.611-204.553 | 1.00 | 0.00 | CARH |
| ATOM | 3335 | C5  | BGLC | 20 | -3.771 | -4.277-206.379 | 1.00 | 2.00 | CARH |
| ATOM | 3336 | H5  | BGLC | 20 | -3.045 | -3.446-206.269 | 1.00 | 0.00 | CARH |
| ATOM | 3337 | O5  | BGLC | 20 | -3.891 | -5.023-205.153 | 1.00 | 2.00 | CARH |
| ATOM | 3338 | C2  | BGLC | 20 | -2.015 | -6.461-205.632 | 1.00 | 2.00 | CARH |
| ATOM | 3339 | H2  | BGLC | 20 | -2.589 | -7.443-205.655 | 1.00 | 0.00 | CARH |
| ATOM | 3340 | O2  | BGLC | 20 | -0.719 | -6.747-205.099 | 1.00 | 2.00 | CARH |
| ATOM | 3341 | HO2 | BGLC | 20 | -0.453 | -7.662-205.085 | 1.00 | 0.00 | CARH |
| ATOM | 3342 | C3  | BGLC | 20 | -1.908 | -5.862-207.016 | 1.00 | 2.00 | CARH |
| ATOM | 3343 | H3  | BGLC | 20 | -1.184 | -5.049-206.972 | 1.00 | 0.00 | CARH |
| ATOM | 3344 | O3  | BGLC | 20 | -1.563 | -6.895-207.960 | 1.00 | 2.00 | CARH |
| ATOM | 3345 | HO3 | BGLC | 20 | -0.699 | -7.275-207.968 | 1.00 | 0.00 | CARH |
| ATOM | 3346 | C4  | BGLC | 20 | -3.193 | -5.167-207.433 | 1.00 | 2.00 | CARH |

|      |      |     |      |    |        |                 |      |      |      |
|------|------|-----|------|----|--------|-----------------|------|------|------|
| ATOM | 3347 | H4  | BGLC | 20 | -3.944 | -5.896-207.722  | 1.00 | 0.00 | CARH |
| ATOM | 3348 | O4  | BGLC | 20 | -3.023 | -4.423-208.654  | 1.00 | 2.00 | CARH |
| ATOM | 3349 | HO4 | BGLC | 20 | -2.561 | -4.991-209.322  | 1.00 | 0.00 | CARH |
| ATOM | 3350 | C6  | BGLC | 20 | -5.158 | -3.755-206.687  | 1.00 | 2.00 | CARH |
| ATOM | 3351 | H61 | BGLC | 20 | -5.680 | -4.660-207.159  | 1.00 | 0.00 | CARH |
| ATOM | 3352 | H62 | BGLC | 20 | -5.804 | -3.493-205.855  | 1.00 | 0.00 | CARH |
| ATOM | 3353 | O6  | BGLC | 20 | -5.102 | -2.807-207.739  | 1.00 | 2.00 | CARH |
| ATOM | 3354 | HO6 | BGLC | 20 | -4.518 | -2.060-207.653  | 1.00 | 0.00 | CARH |
| ATOM | 3355 | C1  | BGLC | 1  | 2.741  | -10.532-106.031 | 1.00 | 2.00 | CARI |
| ATOM | 3356 | H1  | BGLC | 1  | 1.982  | -11.294-105.898 | 1.00 | 0.00 | CARI |
| ATOM | 3357 | O1  | BGLC | 1  | 3.018  | -9.810-104.846  | 1.00 | 2.00 | CARI |
| ATOM | 3358 | HO1 | BGLC | 1  | 3.404  | -9.003-105.112  | 1.00 | 0.00 | CARI |
| ATOM | 3359 | C5  | BGLC | 1  | 3.874  | -11.719-107.757 | 1.00 | 2.00 | CARI |
| ATOM | 3360 | H5  | BGLC | 1  | 3.148  | -12.550-107.643 | 1.00 | 0.00 | CARI |
| ATOM | 3361 | O5  | BGLC | 1  | 3.994  | -10.968-106.535 | 1.00 | 2.00 | CARI |
| ATOM | 3362 | C2  | BGLC | 1  | 2.119  | -9.534-107.018  | 1.00 | 2.00 | CARI |
| ATOM | 3363 | H2  | BGLC | 1  | 2.694  | -8.553-107.045  | 1.00 | 0.00 | CARI |
| ATOM | 3364 | O2  | BGLC | 1  | 0.824  | -9.245-106.485  | 1.00 | 2.00 | CARI |
| ATOM | 3365 | HO2 | BGLC | 1  | 0.558  | -8.330-106.475  | 1.00 | 0.00 | CARI |
| ATOM | 3366 | C3  | BGLC | 1  | 2.010  | -10.137-108.399 | 1.00 | 2.00 | CARI |
| ATOM | 3367 | H3  | BGLC | 1  | 1.286  | -10.950-108.351 | 1.00 | 0.00 | CARI |
| ATOM | 3368 | O3  | BGLC | 1  | 1.664  | -9.108-109.346  | 1.00 | 2.00 | CARI |
| ATOM | 3369 | HO3 | BGLC | 1  | 0.800  | -8.728-109.354  | 1.00 | 0.00 | CARI |
| ATOM | 3370 | C4  | BGLC | 1  | 3.294  | -10.834-108.815 | 1.00 | 2.00 | CARI |
| ATOM | 3371 | H4  | BGLC | 1  | 4.007  | -10.046-109.038 | 1.00 | 0.00 | CARI |
| ATOM | 3372 | O4  | BGLC | 1  | 3.231  | -11.491-110.041 | 1.00 | 2.00 | CARI |
| ATOM | 3373 | C6  | BGLC | 1  | 5.260  | -12.244-108.065 | 1.00 | 2.00 | CARI |
| ATOM | 3374 | H61 | BGLC | 1  | 5.782  | -11.340-108.539 | 1.00 | 0.00 | CARI |
| ATOM | 3375 | H62 | BGLC | 1  | 5.907  | -12.504-107.233 | 1.00 | 0.00 | CARI |
| ATOM | 3376 | O6  | BGLC | 1  | 5.204  | -13.195-109.113 | 1.00 | 2.00 | CARI |
| ATOM | 3377 | HO6 | BGLC | 1  | 4.620  | -13.942-109.024 | 1.00 | 0.00 | CARI |
| ATOM | 3378 | C1  | BGLC | 2  | 3.400  | -10.867-111.221 | 1.00 | 2.00 | CARI |
| ATOM | 3379 | H1  | BGLC | 2  | 4.071  | -10.021-111.127 | 1.00 | 0.00 | CARI |
| ATOM | 3380 | C5  | BGLC | 2  | 2.264  | -9.686-112.951  | 1.00 | 2.00 | CARI |
| ATOM | 3381 | H5  | BGLC | 2  | 2.990  | -8.855-112.841  | 1.00 | 0.00 | CARI |
| ATOM | 3382 | O5  | BGLC | 2  | 2.145  | -10.432-111.725 | 1.00 | 2.00 | CARI |
| ATOM | 3383 | C2  | BGLC | 2  | 4.020  | -11.867-112.204 | 1.00 | 2.00 | CARI |
| ATOM | 3384 | H2  | BGLC | 2  | 3.445  | -12.848-112.226 | 1.00 | 0.00 | CARI |
| ATOM | 3385 | O2  | BGLC | 2  | 5.316  | -12.155-111.671 | 1.00 | 2.00 | CARI |
| ATOM | 3386 | HO2 | BGLC | 2  | 5.582  | -13.070-111.658 | 1.00 | 0.00 | CARI |
| ATOM | 3387 | C3  | BGLC | 2  | 4.128  | -11.270-113.587 | 1.00 | 2.00 | CARI |
| ATOM | 3388 | H3  | BGLC | 2  | 4.852  | -10.457-113.543 | 1.00 | 0.00 | CARI |
| ATOM | 3389 | O3  | BGLC | 2  | 4.473  | -12.304-114.531 | 1.00 | 2.00 | CARI |
| ATOM | 3390 | HO3 | BGLC | 2  | 5.337  | -12.684-114.538 | 1.00 | 0.00 | CARI |
| ATOM | 3391 | C4  | BGLC | 2  | 2.843  | -10.575-114.005 | 1.00 | 2.00 | CARI |
| ATOM | 3392 | H4  | BGLC | 2  | 2.130  | -11.364-114.224 | 1.00 | 0.00 | CARI |
| ATOM | 3393 | O4  | BGLC | 2  | 2.904  | -9.921-115.234  | 1.00 | 2.00 | CARI |
| ATOM | 3394 | C6  | BGLC | 2  | 0.878  | -9.163-113.259  | 1.00 | 2.00 | CARI |
| ATOM | 3395 | H61 | BGLC | 2  | 0.355  | -10.069-113.730 | 1.00 | 0.00 | CARI |
| ATOM | 3396 | H62 | BGLC | 2  | 0.232  | -8.900-112.427  | 1.00 | 0.00 | CARI |
| ATOM | 3397 | O6  | BGLC | 2  | 0.933  | -8.215-114.311  | 1.00 | 2.00 | CARI |
| ATOM | 3398 | HO6 | BGLC | 2  | 1.517  | -7.468-114.226  | 1.00 | 0.00 | CARI |
| ATOM | 3399 | C1  | BGLC | 3  | 2.736  | -10.552-116.411 | 1.00 | 2.00 | CARI |
| ATOM | 3400 | H1  | BGLC | 3  | 2.067  | -11.399-116.312 | 1.00 | 0.00 | CARI |

|      |      |     |      |   |       |         |          |      |      |      |
|------|------|-----|------|---|-------|---------|----------|------|------|------|
| ATOM | 3401 | C5  | BGLC | 3 | 3.869 | -11.739 | -118.137 | 1.00 | 2.00 | CARI |
| ATOM | 3402 | H5  | BGLC | 3 | 3.143 | -12.569 | -118.023 | 1.00 | 0.00 | CARI |
| ATOM | 3403 | O5  | BGLC | 3 | 3.990 | -10.989 | -116.915 | 1.00 | 2.00 | CARI |
| ATOM | 3404 | C2  | BGLC | 3 | 2.114 | -9.554  | -117.398 | 1.00 | 2.00 | CARI |
| ATOM | 3405 | H2  | BGLC | 3 | 2.688 | -8.572  | -117.426 | 1.00 | 0.00 | CARI |
| ATOM | 3406 | O2  | BGLC | 3 | 0.820 | -9.265  | -116.865 | 1.00 | 2.00 | CARI |
| ATOM | 3407 | HO2 | BGLC | 3 | 0.554 | -8.350  | -116.855 | 1.00 | 0.00 | CARI |
| ATOM | 3408 | C3  | BGLC | 3 | 2.006 | -10.159 | -118.778 | 1.00 | 2.00 | CARI |
| ATOM | 3409 | H3  | BGLC | 3 | 1.283 | -10.972 | -118.729 | 1.00 | 0.00 | CARI |
| ATOM | 3410 | O3  | BGLC | 3 | 1.659 | -9.129  | -119.726 | 1.00 | 2.00 | CARI |
| ATOM | 3411 | HO3 | BGLC | 3 | 0.794 | -8.750  | -119.734 | 1.00 | 0.00 | CARI |
| ATOM | 3412 | C4  | BGLC | 3 | 3.290 | -10.855 | -119.195 | 1.00 | 2.00 | CARI |
| ATOM | 3413 | H4  | BGLC | 3 | 4.003 | -10.067 | -119.418 | 1.00 | 0.00 | CARI |
| ATOM | 3414 | O4  | BGLC | 3 | 3.226 | -11.512 | -120.421 | 1.00 | 2.00 | CARI |
| ATOM | 3415 | C6  | BGLC | 3 | 5.257 | -12.264 | -118.445 | 1.00 | 2.00 | CARI |
| ATOM | 3416 | H61 | BGLC | 3 | 5.780 | -11.361 | -118.921 | 1.00 | 0.00 | CARI |
| ATOM | 3417 | H62 | BGLC | 3 | 5.904 | -12.524 | -117.613 | 1.00 | 0.00 | CARI |
| ATOM | 3418 | O6  | BGLC | 3 | 5.199 | -13.215 | -119.493 | 1.00 | 2.00 | CARI |
| ATOM | 3419 | HO6 | BGLC | 3 | 4.615 | -13.961 | -119.404 | 1.00 | 0.00 | CARI |
| ATOM | 3420 | C1  | BGLC | 4 | 3.395 | -10.887 | -121.601 | 1.00 | 2.00 | CARI |
| ATOM | 3421 | H1  | BGLC | 4 | 4.065 | -10.040 | -121.506 | 1.00 | 0.00 | CARI |
| ATOM | 3422 | C5  | BGLC | 4 | 2.260 | -9.707  | -123.331 | 1.00 | 2.00 | CARI |
| ATOM | 3423 | H5  | BGLC | 4 | 2.987 | -8.876  | -123.221 | 1.00 | 0.00 | CARI |
| ATOM | 3424 | O5  | BGLC | 4 | 2.140 | -10.453 | -122.105 | 1.00 | 2.00 | CARI |
| ATOM | 3425 | C2  | BGLC | 4 | 4.016 | -11.888 | -122.584 | 1.00 | 2.00 | CARI |
| ATOM | 3426 | H2  | BGLC | 4 | 3.441 | -12.869 | -122.606 | 1.00 | 0.00 | CARI |
| ATOM | 3427 | O2  | BGLC | 4 | 5.312 | -12.176 | -122.051 | 1.00 | 2.00 | CARI |
| ATOM | 3428 | HO2 | BGLC | 4 | 5.578 | -13.091 | -122.038 | 1.00 | 0.00 | CARI |
| ATOM | 3429 | C3  | BGLC | 4 | 4.124 | -11.291 | -123.967 | 1.00 | 2.00 | CARI |
| ATOM | 3430 | H3  | BGLC | 4 | 4.847 | -10.477 | -123.924 | 1.00 | 0.00 | CARI |
| ATOM | 3431 | O3  | BGLC | 4 | 4.468 | -12.324 | -124.911 | 1.00 | 2.00 | CARI |
| ATOM | 3432 | HO3 | BGLC | 4 | 5.332 | -12.705 | -124.919 | 1.00 | 0.00 | CARI |
| ATOM | 3433 | C4  | BGLC | 4 | 2.838 | -10.597 | -124.385 | 1.00 | 2.00 | CARI |
| ATOM | 3434 | H4  | BGLC | 4 | 2.124 | -11.385 | -124.604 | 1.00 | 0.00 | CARI |
| ATOM | 3435 | O4  | BGLC | 4 | 2.901 | -9.942  | -125.614 | 1.00 | 2.00 | CARI |
| ATOM | 3436 | C6  | BGLC | 4 | 0.873 | -9.183  | -123.639 | 1.00 | 2.00 | CARI |
| ATOM | 3437 | H61 | BGLC | 4 | 0.350 | -10.088 | -124.110 | 1.00 | 0.00 | CARI |
| ATOM | 3438 | H62 | BGLC | 4 | 0.227 | -8.920  | -122.807 | 1.00 | 0.00 | CARI |
| ATOM | 3439 | O6  | BGLC | 4 | 0.929 | -8.236  | -124.691 | 1.00 | 2.00 | CARI |
| ATOM | 3440 | HO6 | BGLC | 4 | 1.514 | -7.489  | -124.606 | 1.00 | 0.00 | CARI |
| ATOM | 3441 | C1  | BGLC | 5 | 2.732 | -10.573 | -126.791 | 1.00 | 2.00 | CARI |
| ATOM | 3442 | H1  | BGLC | 5 | 2.063 | -11.420 | -126.692 | 1.00 | 0.00 | CARI |
| ATOM | 3443 | C5  | BGLC | 5 | 3.866 | -11.761 | -128.517 | 1.00 | 2.00 | CARI |
| ATOM | 3444 | H5  | BGLC | 5 | 3.140 | -12.592 | -128.402 | 1.00 | 0.00 | CARI |
| ATOM | 3445 | O5  | BGLC | 5 | 3.986 | -11.009 | -127.295 | 1.00 | 2.00 | CARI |
| ATOM | 3446 | C2  | BGLC | 5 | 2.109 | -9.575  | -127.778 | 1.00 | 2.00 | CARI |
| ATOM | 3447 | H2  | BGLC | 5 | 2.683 | -8.593  | -127.805 | 1.00 | 0.00 | CARI |
| ATOM | 3448 | O2  | BGLC | 5 | 0.815 | -9.286  | -127.245 | 1.00 | 2.00 | CARI |
| ATOM | 3449 | HO2 | BGLC | 5 | 0.549 | -8.371  | -127.235 | 1.00 | 0.00 | CARI |
| ATOM | 3450 | C3  | BGLC | 5 | 2.002 | -10.179 | -129.158 | 1.00 | 2.00 | CARI |
| ATOM | 3451 | H3  | BGLC | 5 | 1.279 | -10.992 | -129.109 | 1.00 | 0.00 | CARI |
| ATOM | 3452 | O3  | BGLC | 5 | 1.655 | -9.149  | -130.106 | 1.00 | 2.00 | CARI |
| ATOM | 3453 | HO3 | BGLC | 5 | 0.790 | -8.770  | -130.115 | 1.00 | 0.00 | CARI |
| ATOM | 3454 | C4  | BGLC | 5 | 3.286 | -10.875 | -129.575 | 1.00 | 2.00 | CARI |



|      |      |     |      |   |       |         |          |      |      |      |
|------|------|-----|------|---|-------|---------|----------|------|------|------|
| ATOM | 3455 | H4  | BGLC | 5 | 4.000 | -10.088 | -129.799 | 1.00 | 0.00 | CARI |
| ATOM | 3456 | O4  | BGLC | 5 | 3.221 | -11.534 | -130.801 | 1.00 | 2.00 | CARI |
| ATOM | 3457 | C6  | BGLC | 5 | 5.252 | -12.285 | -128.825 | 1.00 | 2.00 | CARI |
| ATOM | 3458 | O61 | BGLC | 5 | 5.272 | -13.700 | -128.869 | 1.00 | 0.00 | CARI |
| ATOM | 3459 | O62 | BGLC | 5 | 5.930 | -11.435 | -128.945 | 1.00 | 0.00 | CARI |
| ATOM | 3460 | C1  | BGLC | 6 | 3.391 | -10.908 | -131.981 | 1.00 | 2.00 | CARI |
| ATOM | 3461 | H1  | BGLC | 6 | 4.061 | -10.061 | -131.885 | 1.00 | 0.00 | CARI |
| ATOM | 3462 | C5  | BGLC | 6 | 2.256 | -9.728  | -133.711 | 1.00 | 2.00 | CARI |
| ATOM | 3463 | H5  | BGLC | 6 | 2.983 | -8.898  | -133.601 | 1.00 | 0.00 | CARI |
| ATOM | 3464 | O5  | BGLC | 6 | 2.136 | -10.474 | -132.485 | 1.00 | 2.00 | CARI |
| ATOM | 3465 | C2  | BGLC | 6 | 4.011 | -11.910 | -132.964 | 1.00 | 2.00 | CARI |
| ATOM | 3466 | H2  | BGLC | 6 | 3.436 | -12.891 | -132.988 | 1.00 | 0.00 | CARI |
| ATOM | 3467 | O2  | BGLC | 6 | 5.308 | -12.197 | -132.431 | 1.00 | 2.00 | CARI |
| ATOM | 3468 | HO2 | BGLC | 6 | 5.574 | -13.112 | -132.417 | 1.00 | 0.00 | CARI |
| ATOM | 3469 | C3  | BGLC | 6 | 4.120 | -11.311 | -134.347 | 1.00 | 2.00 | CARI |
| ATOM | 3470 | H3  | BGLC | 6 | 4.843 | -10.497 | -134.304 | 1.00 | 0.00 | CARI |
| ATOM | 3471 | O3  | BGLC | 6 | 4.464 | -12.345 | -135.291 | 1.00 | 2.00 | CARI |
| ATOM | 3472 | HO3 | BGLC | 6 | 5.328 | -12.726 | -135.298 | 1.00 | 0.00 | CARI |
| ATOM | 3473 | C4  | BGLC | 6 | 2.833 | -10.617 | -134.765 | 1.00 | 2.00 | CARI |
| ATOM | 3474 | H4  | BGLC | 6 | 2.119 | -11.405 | -134.984 | 1.00 | 0.00 | CARI |
| ATOM | 3475 | O4  | BGLC | 6 | 2.896 | -9.963  | -135.994 | 1.00 | 2.00 | CARI |
| ATOM | 3476 | C6  | BGLC | 6 | 0.870 | -9.204  | -134.019 | 1.00 | 2.00 | CARI |
| ATOM | 3477 | H61 | BGLC | 6 | 0.347 | -10.110 | -134.489 | 1.00 | 0.00 | CARI |
| ATOM | 3478 | H62 | BGLC | 6 | 0.224 | -8.940  | -133.187 | 1.00 | 0.00 | CARI |
| ATOM | 3479 | O6  | BGLC | 6 | 0.924 | -8.257  | -135.071 | 1.00 | 2.00 | CARI |
| ATOM | 3480 | HO6 | BGLC | 6 | 1.508 | -7.510  | -134.986 | 1.00 | 0.00 | CARI |
| ATOM | 3481 | C1  | BGLC | 7 | 2.728 | -10.594 | -137.171 | 1.00 | 2.00 | CARI |
| ATOM | 3482 | H1  | BGLC | 7 | 2.060 | -11.441 | -137.072 | 1.00 | 0.00 | CARI |
| ATOM | 3483 | C5  | BGLC | 7 | 3.861 | -11.782 | -138.897 | 1.00 | 2.00 | CARI |
| ATOM | 3484 | H5  | BGLC | 7 | 3.136 | -12.613 | -138.782 | 1.00 | 0.00 | CARI |
| ATOM | 3485 | O5  | BGLC | 7 | 3.981 | -11.029 | -137.675 | 1.00 | 2.00 | CARI |
| ATOM | 3486 | C2  | BGLC | 7 | 2.104 | -9.595  | -138.158 | 1.00 | 2.00 | CARI |
| ATOM | 3487 | H2  | BGLC | 7 | 2.677 | -8.613  | -138.185 | 1.00 | 0.00 | CARI |
| ATOM | 3488 | O2  | BGLC | 7 | 0.810 | -9.307  | -137.625 | 1.00 | 2.00 | CARI |
| ATOM | 3489 | HO2 | BGLC | 7 | 0.543 | -8.392  | -137.615 | 1.00 | 0.00 | CARI |
| ATOM | 3490 | C3  | BGLC | 7 | 1.998 | -10.200 | -139.538 | 1.00 | 2.00 | CARI |
| ATOM | 3491 | H3  | BGLC | 7 | 1.275 | -11.013 | -139.489 | 1.00 | 0.00 | CARI |
| ATOM | 3492 | O3  | BGLC | 7 | 1.650 | -9.170  | -140.486 | 1.00 | 2.00 | CARI |
| ATOM | 3493 | HO3 | BGLC | 7 | 0.785 | -8.792  | -140.495 | 1.00 | 0.00 | CARI |
| ATOM | 3494 | C4  | BGLC | 7 | 3.281 | -10.895 | -139.955 | 1.00 | 2.00 | CARI |
| ATOM | 3495 | H4  | BGLC | 7 | 3.995 | -10.108 | -140.178 | 1.00 | 0.00 | CARI |
| ATOM | 3496 | O4  | BGLC | 7 | 3.217 | -11.554 | -141.181 | 1.00 | 2.00 | CARI |
| ATOM | 3497 | C6  | BGLC | 7 | 5.247 | -12.305 | -139.205 | 1.00 | 2.00 | CARI |
| ATOM | 3498 | H61 | BGLC | 7 | 5.768 | -11.401 | -139.681 | 1.00 | 0.00 | CARI |
| ATOM | 3499 | H62 | BGLC | 7 | 5.895 | -12.563 | -138.373 | 1.00 | 0.00 | CARI |
| ATOM | 3500 | O6  | BGLC | 7 | 5.191 | -13.258 | -140.253 | 1.00 | 2.00 | CARI |
| ATOM | 3501 | HO6 | BGLC | 7 | 4.608 | -14.005 | -140.163 | 1.00 | 0.00 | CARI |
| ATOM | 3502 | C1  | BGLC | 8 | 3.386 | -10.928 | -142.361 | 1.00 | 2.00 | CARI |
| ATOM | 3503 | H1  | BGLC | 8 | 4.056 | -10.081 | -142.265 | 1.00 | 0.00 | CARI |
| ATOM | 3504 | C5  | BGLC | 8 | 2.251 | -9.750  | -144.090 | 1.00 | 2.00 | CARI |
| ATOM | 3505 | H5  | BGLC | 8 | 2.978 | -8.920  | -143.981 | 1.00 | 0.00 | CARI |
| ATOM | 3506 | O5  | BGLC | 8 | 2.132 | -10.494 | -142.865 | 1.00 | 2.00 | CARI |
| ATOM | 3507 | C2  | BGLC | 8 | 4.007 | -11.930 | -143.344 | 1.00 | 2.00 | CARI |
| ATOM | 3508 | H2  | BGLC | 8 | 3.433 | -12.912 | -143.367 | 1.00 | 0.00 | CARI |

|      |      |     |      |    |       |         |          |      |      |      |
|------|------|-----|------|----|-------|---------|----------|------|------|------|
| ATOM | 3509 | O2  | BGLC | 8  | 5.303 | -12.217 | -142.811 | 1.00 | 2.00 | CARI |
| ATOM | 3510 | HO2 | BGLC | 8  | 5.569 | -13.132 | -142.797 | 1.00 | 0.00 | CARI |
| ATOM | 3511 | C3  | BGLC | 8  | 4.115 | -11.331 | -144.727 | 1.00 | 2.00 | CARI |
| ATOM | 3512 | H3  | BGLC | 8  | 4.838 | -10.517 | -144.685 | 1.00 | 0.00 | CARI |
| ATOM | 3513 | O3  | BGLC | 8  | 4.460 | -12.366 | -145.671 | 1.00 | 2.00 | CARI |
| ATOM | 3514 | HO3 | BGLC | 8  | 5.324 | -12.747 | -145.678 | 1.00 | 0.00 | CARI |
| ATOM | 3515 | C4  | BGLC | 8  | 2.828 | -10.638 | -145.145 | 1.00 | 2.00 | CARI |
| ATOM | 3516 | H4  | BGLC | 8  | 2.114 | -11.426 | -145.365 | 1.00 | 0.00 | CARI |
| ATOM | 3517 | O4  | BGLC | 8  | 2.891 | -9.984  | -146.374 | 1.00 | 2.00 | CARI |
| ATOM | 3518 | C6  | BGLC | 8  | 0.865 | -9.225  | -144.399 | 1.00 | 2.00 | CARI |
| ATOM | 3519 | H61 | BGLC | 8  | 0.342 | -10.130 | -144.870 | 1.00 | 0.00 | CARI |
| ATOM | 3520 | H62 | BGLC | 8  | 0.219 | -8.962  | -143.568 | 1.00 | 0.00 | CARI |
| ATOM | 3521 | O6  | BGLC | 8  | 0.921 | -8.277  | -145.451 | 1.00 | 2.00 | CARI |
| ATOM | 3522 | HO6 | BGLC | 8  | 1.506 | -7.530  | -145.365 | 1.00 | 0.00 | CARI |
| ATOM | 3523 | C1  | BGLC | 9  | 2.723 | -10.614 | -147.551 | 1.00 | 2.00 | CARI |
| ATOM | 3524 | H1  | BGLC | 9  | 2.053 | -11.460 | -147.453 | 1.00 | 0.00 | CARI |
| ATOM | 3525 | C5  | BGLC | 9  | 3.857 | -11.802 | -149.277 | 1.00 | 2.00 | CARI |
| ATOM | 3526 | H5  | BGLC | 9  | 3.131 | -12.633 | -149.163 | 1.00 | 0.00 | CARI |
| ATOM | 3527 | O5  | BGLC | 9  | 3.976 | -11.051 | -148.055 | 1.00 | 2.00 | CARI |
| ATOM | 3528 | C2  | BGLC | 9  | 2.101 | -9.616  | -148.538 | 1.00 | 2.00 | CARI |
| ATOM | 3529 | H2  | BGLC | 9  | 2.675 | -8.634  | -148.566 | 1.00 | 0.00 | CARI |
| ATOM | 3530 | O2  | BGLC | 9  | 0.805 | -9.327  | -148.005 | 1.00 | 2.00 | CARI |
| ATOM | 3531 | HO2 | BGLC | 9  | 0.539 | -8.412  | -147.995 | 1.00 | 0.00 | CARI |
| ATOM | 3532 | C3  | BGLC | 9  | 1.993 | -10.221 | -149.918 | 1.00 | 2.00 | CARI |
| ATOM | 3533 | H3  | BGLC | 9  | 1.270 | -11.035 | -149.870 | 1.00 | 0.00 | CARI |
| ATOM | 3534 | O3  | BGLC | 9  | 1.646 | -9.191  | -150.866 | 1.00 | 2.00 | CARI |
| ATOM | 3535 | HO3 | BGLC | 9  | 0.781 | -8.812  | -150.874 | 1.00 | 0.00 | CARI |
| ATOM | 3536 | C4  | BGLC | 9  | 3.277 | -10.916 | -150.335 | 1.00 | 2.00 | CARI |
| ATOM | 3537 | H4  | BGLC | 9  | 3.991 | -10.129 | -150.559 | 1.00 | 0.00 | CARI |
| ATOM | 3538 | O4  | BGLC | 9  | 3.212 | -11.575 | -151.561 | 1.00 | 2.00 | CARI |
| ATOM | 3539 | C6  | BGLC | 9  | 5.242 | -12.326 | -149.585 | 1.00 | 2.00 | CARI |
| ATOM | 3540 | O61 | BGLC | 9  | 5.262 | -13.741 | -149.629 | 1.00 | 0.00 | CARI |
| ATOM | 3541 | O62 | BGLC | 9  | 5.920 | -11.476 | -149.705 | 1.00 | 0.00 | CARI |
| ATOM | 3542 | C1  | BGLC | 10 | 3.382 | -10.950 | -152.741 | 1.00 | 2.00 | CARI |
| ATOM | 3543 | H1  | BGLC | 10 | 4.053 | -10.104 | -152.646 | 1.00 | 0.00 | CARI |
| ATOM | 3544 | C5  | BGLC | 10 | 2.247 | -9.769  | -154.470 | 1.00 | 2.00 | CARI |
| ATOM | 3545 | H5  | BGLC | 10 | 2.973 | -8.938  | -154.360 | 1.00 | 0.00 | CARI |
| ATOM | 3546 | O5  | BGLC | 10 | 2.128 | -10.515 | -153.245 | 1.00 | 2.00 | CARI |
| ATOM | 3547 | C2  | BGLC | 10 | 4.003 | -11.951 | -153.724 | 1.00 | 2.00 | CARI |
| ATOM | 3548 | H2  | BGLC | 10 | 3.429 | -12.933 | -153.746 | 1.00 | 0.00 | CARI |
| ATOM | 3549 | O2  | BGLC | 10 | 5.298 | -12.238 | -153.191 | 1.00 | 2.00 | CARI |
| ATOM | 3550 | HO2 | BGLC | 10 | 5.564 | -13.153 | -153.178 | 1.00 | 0.00 | CARI |
| ATOM | 3551 | C3  | BGLC | 10 | 4.110 | -11.353 | -155.107 | 1.00 | 2.00 | CARI |
| ATOM | 3552 | H3  | BGLC | 10 | 4.833 | -10.539 | -155.063 | 1.00 | 0.00 | CARI |
| ATOM | 3553 | O3  | BGLC | 10 | 4.456 | -12.387 | -156.051 | 1.00 | 2.00 | CARI |
| ATOM | 3554 | HO3 | BGLC | 10 | 5.321 | -12.766 | -156.059 | 1.00 | 0.00 | CARI |
| ATOM | 3555 | C4  | BGLC | 10 | 2.824 | -10.659 | -155.525 | 1.00 | 2.00 | CARI |
| ATOM | 3556 | H4  | BGLC | 10 | 2.110 | -11.447 | -155.744 | 1.00 | 0.00 | CARI |
| ATOM | 3557 | O4  | BGLC | 10 | 2.886 | -10.004 | -156.754 | 1.00 | 2.00 | CARI |
| ATOM | 3558 | C6  | BGLC | 10 | 0.861 | -9.245  | -154.779 | 1.00 | 2.00 | CARI |
| ATOM | 3559 | H61 | BGLC | 10 | 0.338 | -10.151 | -155.249 | 1.00 | 0.00 | CARI |
| ATOM | 3560 | H62 | BGLC | 10 | 0.215 | -8.981  | -153.948 | 1.00 | 0.00 | CARI |
| ATOM | 3561 | O6  | BGLC | 10 | 0.916 | -8.298  | -155.831 | 1.00 | 2.00 | CARI |
| ATOM | 3562 | HO6 | BGLC | 10 | 1.500 | -7.551  | -155.746 | 1.00 | 0.00 | CARI |

|      |      |     |      |    |       |         |          |      |      |      |
|------|------|-----|------|----|-------|---------|----------|------|------|------|
| ATOM | 3563 | C1  | BGLC | 11 | 2.719 | -10.634 | -157.931 | 1.00 | 2.00 | CARI |
| ATOM | 3564 | H1  | BGLC | 11 | 2.049 | -11.480 | -157.833 | 1.00 | 0.00 | CARI |
| ATOM | 3565 | C5  | BGLC | 11 | 3.852 | -11.822 | -159.657 | 1.00 | 2.00 | CARI |
| ATOM | 3566 | H5  | BGLC | 11 | 3.125 | -12.652 | -159.544 | 1.00 | 0.00 | CARI |
| ATOM | 3567 | O5  | BGLC | 11 | 3.971 | -11.072 | -158.435 | 1.00 | 2.00 | CARI |
| ATOM | 3568 | C2  | BGLC | 11 | 2.096 | -9.636  | -158.918 | 1.00 | 2.00 | CARI |
| ATOM | 3569 | H2  | BGLC | 11 | 2.669 | -8.654  | -158.946 | 1.00 | 0.00 | CARI |
| ATOM | 3570 | O2  | BGLC | 11 | 0.802 | -9.348  | -158.385 | 1.00 | 2.00 | CARI |
| ATOM | 3571 | HO2 | BGLC | 11 | 0.535 | -8.433  | -158.375 | 1.00 | 0.00 | CARI |
| ATOM | 3572 | C3  | BGLC | 11 | 1.989 | -10.241 | -160.298 | 1.00 | 2.00 | CARI |
| ATOM | 3573 | H3  | BGLC | 11 | 1.265 | -11.054 | -160.249 | 1.00 | 0.00 | CARI |
| ATOM | 3574 | O3  | BGLC | 11 | 1.642 | -9.211  | -161.246 | 1.00 | 2.00 | CARI |
| ATOM | 3575 | HO3 | BGLC | 11 | 0.777 | -8.832  | -161.255 | 1.00 | 0.00 | CARI |
| ATOM | 3576 | C4  | BGLC | 11 | 3.272 | -10.938 | -160.715 | 1.00 | 2.00 | CARI |
| ATOM | 3577 | H4  | BGLC | 11 | 3.985 | -10.150 | -160.939 | 1.00 | 0.00 | CARI |
| ATOM | 3578 | O4  | BGLC | 11 | 3.208 | -11.596 | -161.941 | 1.00 | 2.00 | CARI |
| ATOM | 3579 | C6  | BGLC | 11 | 5.238 | -12.348 | -159.965 | 1.00 | 2.00 | CARI |
| ATOM | 3580 | H61 | BGLC | 11 | 5.761 | -11.445 | -160.440 | 1.00 | 0.00 | CARI |
| ATOM | 3581 | H62 | BGLC | 11 | 5.885 | -12.609 | -159.133 | 1.00 | 0.00 | CARI |
| ATOM | 3582 | O6  | BGLC | 11 | 5.181 | -13.299 | -161.013 | 1.00 | 2.00 | CARI |
| ATOM | 3583 | HO6 | BGLC | 11 | 4.596 | -14.045 | -160.924 | 1.00 | 0.00 | CARI |
| ATOM | 3584 | C1  | BGLC | 12 | 3.377 | -10.970 | -163.121 | 1.00 | 2.00 | CARI |
| ATOM | 3585 | H1  | BGLC | 12 | 4.047 | -10.123 | -163.025 | 1.00 | 0.00 | CARI |
| ATOM | 3586 | C5  | BGLC | 12 | 2.242 | -9.790  | -164.850 | 1.00 | 2.00 | CARI |
| ATOM | 3587 | H5  | BGLC | 12 | 2.968 | -8.959  | -164.740 | 1.00 | 0.00 | CARI |
| ATOM | 3588 | O5  | BGLC | 12 | 2.123 | -10.536 | -163.625 | 1.00 | 2.00 | CARI |
| ATOM | 3589 | C2  | BGLC | 12 | 3.998 | -11.971 | -164.104 | 1.00 | 2.00 | CARI |
| ATOM | 3590 | H2  | BGLC | 12 | 3.424 | -12.953 | -164.126 | 1.00 | 0.00 | CARI |
| ATOM | 3591 | O2  | BGLC | 12 | 5.293 | -12.258 | -163.571 | 1.00 | 2.00 | CARI |
| ATOM | 3592 | HO2 | BGLC | 12 | 5.559 | -13.173 | -163.558 | 1.00 | 0.00 | CARI |
| ATOM | 3593 | C3  | BGLC | 12 | 4.105 | -11.373 | -165.487 | 1.00 | 2.00 | CARI |
| ATOM | 3594 | H3  | BGLC | 12 | 4.829 | -10.560 | -165.443 | 1.00 | 0.00 | CARI |
| ATOM | 3595 | O3  | BGLC | 12 | 4.451 | -12.408 | -166.431 | 1.00 | 2.00 | CARI |
| ATOM | 3596 | HO3 | BGLC | 12 | 5.315 | -12.787 | -166.438 | 1.00 | 0.00 | CARI |
| ATOM | 3597 | C4  | BGLC | 12 | 2.821 | -10.679 | -165.905 | 1.00 | 2.00 | CARI |
| ATOM | 3598 | H4  | BGLC | 12 | 2.109 | -11.469 | -166.123 | 1.00 | 0.00 | CARI |
| ATOM | 3599 | O4  | BGLC | 12 | 2.881 | -10.025 | -167.134 | 1.00 | 2.00 | CARI |
| ATOM | 3600 | C6  | BGLC | 12 | 0.856 | -9.267  | -165.159 | 1.00 | 2.00 | CARI |
| ATOM | 3601 | H61 | BGLC | 12 | 0.334 | -10.173 | -165.630 | 1.00 | 0.00 | CARI |
| ATOM | 3602 | H62 | BGLC | 12 | 0.209 | -9.004  | -164.328 | 1.00 | 0.00 | CARI |
| ATOM | 3603 | O6  | BGLC | 12 | 0.911 | -8.319  | -166.211 | 1.00 | 2.00 | CARI |
| ATOM | 3604 | HO6 | BGLC | 12 | 1.495 | -7.572  | -166.125 | 1.00 | 0.00 | CARI |
| ATOM | 3605 | C1  | BGLC | 13 | 2.714 | -10.656 | -168.311 | 1.00 | 2.00 | CARI |
| ATOM | 3606 | H1  | BGLC | 13 | 2.045 | -11.503 | -168.212 | 1.00 | 0.00 | CARI |
| ATOM | 3607 | C5  | BGLC | 13 | 3.847 | -11.843 | -170.037 | 1.00 | 2.00 | CARI |
| ATOM | 3608 | H5  | BGLC | 13 | 3.121 | -12.674 | -169.922 | 1.00 | 0.00 | CARI |
| ATOM | 3609 | O5  | BGLC | 13 | 3.968 | -11.092 | -168.815 | 1.00 | 2.00 | CARI |
| ATOM | 3610 | C2  | BGLC | 13 | 2.092 | -9.658  | -169.298 | 1.00 | 2.00 | CARI |
| ATOM | 3611 | H2  | BGLC | 13 | 2.666 | -8.677  | -169.326 | 1.00 | 0.00 | CARI |
| ATOM | 3612 | O2  | BGLC | 13 | 0.797 | -9.368  | -168.765 | 1.00 | 2.00 | CARI |
| ATOM | 3613 | HO2 | BGLC | 13 | 0.531 | -8.453  | -168.755 | 1.00 | 0.00 | CARI |
| ATOM | 3614 | C3  | BGLC | 13 | 1.984 | -10.263 | -170.678 | 1.00 | 2.00 | CARI |
| ATOM | 3615 | H3  | BGLC | 13 | 1.261 | -11.077 | -170.630 | 1.00 | 0.00 | CARI |
| ATOM | 3616 | O3  | BGLC | 13 | 1.637 | -9.233  | -171.626 | 1.00 | 2.00 | CARI |

|      |      |          |    |       |                 |      |      |      |
|------|------|----------|----|-------|-----------------|------|------|------|
| ATOM | 3617 | HO3 BGLC | 13 | 0.772 | -8.854-171.634  | 1.00 | 0.00 | CARI |
| ATOM | 3618 | C4 BGLC  | 13 | 3.268 | -10.958-171.095 | 1.00 | 2.00 | CARI |
| ATOM | 3619 | H4 BGLC  | 13 | 3.982 | -10.171-171.318 | 1.00 | 0.00 | CARI |
| ATOM | 3620 | O4 BGLC  | 13 | 3.204 | -11.616-172.321 | 1.00 | 2.00 | CARI |
| ATOM | 3621 | C6 BGLC  | 13 | 5.234 | -12.367-170.345 | 1.00 | 2.00 | CARI |
| ATOM | 3622 | O61 BGLC | 13 | 5.255 | -13.782-170.389 | 1.00 | 0.00 | CARI |
| ATOM | 3623 | O62 BGLC | 13 | 5.912 | -11.517-170.465 | 1.00 | 0.00 | CARI |
| ATOM | 3624 | C1 BGLC  | 14 | 3.372 | -10.991-173.501 | 1.00 | 2.00 | CARI |
| ATOM | 3625 | H1 BGLC  | 14 | 4.042 | -10.144-173.407 | 1.00 | 0.00 | CARI |
| ATOM | 3626 | C5 BGLC  | 14 | 2.237 | -9.810-175.230  | 1.00 | 2.00 | CARI |
| ATOM | 3627 | H5 BGLC  | 14 | 2.963 | -8.979-175.119  | 1.00 | 0.00 | CARI |
| ATOM | 3628 | O5 BGLC  | 14 | 2.118 | -10.557-174.005 | 1.00 | 2.00 | CARI |
| ATOM | 3629 | C2 BGLC  | 14 | 3.994 | -11.992-174.484 | 1.00 | 2.00 | CARI |
| ATOM | 3630 | H2 BGLC  | 14 | 3.420 | -12.974-174.506 | 1.00 | 0.00 | CARI |
| ATOM | 3631 | O2 BGLC  | 14 | 5.290 | -12.279-173.951 | 1.00 | 2.00 | CARI |
| ATOM | 3632 | HO2 BGLC | 14 | 5.556 | -13.194-173.938 | 1.00 | 0.00 | CARI |
| ATOM | 3633 | C3 BGLC  | 14 | 4.101 | -11.394-175.867 | 1.00 | 2.00 | CARI |
| ATOM | 3634 | H3 BGLC  | 14 | 4.824 | -10.581-175.823 | 1.00 | 0.00 | CARI |
| ATOM | 3635 | O3 BGLC  | 14 | 4.446 | -12.428-176.811 | 1.00 | 2.00 | CARI |
| ATOM | 3636 | HO3 BGLC | 14 | 5.310 | -12.808-176.819 | 1.00 | 0.00 | CARI |
| ATOM | 3637 | C4 BGLC  | 14 | 2.816 | -10.700-176.285 | 1.00 | 2.00 | CARI |
| ATOM | 3638 | H4 BGLC  | 14 | 2.103 | -11.489-176.504 | 1.00 | 0.00 | CARI |
| ATOM | 3639 | O4 BGLC  | 14 | 2.878 | -10.045-177.514 | 1.00 | 2.00 | CARI |
| ATOM | 3640 | C6 BGLC  | 14 | 0.851 | -9.287-175.539  | 1.00 | 2.00 | CARI |
| ATOM | 3641 | H61 BGLC | 14 | 0.328 | -10.193-176.010 | 1.00 | 0.00 | CARI |
| ATOM | 3642 | H62 BGLC | 14 | 0.205 | -9.024-174.708  | 1.00 | 0.00 | CARI |
| ATOM | 3643 | O6 BGLC  | 14 | 0.907 | -8.340-176.591  | 1.00 | 2.00 | CARI |
| ATOM | 3644 | HO6 BGLC | 14 | 1.491 | -7.593-176.505  | 1.00 | 0.00 | CARI |
| ATOM | 3645 | C1 BGLC  | 15 | 2.709 | -10.677-178.691 | 1.00 | 2.00 | CARI |
| ATOM | 3646 | H1 BGLC  | 15 | 2.040 | -11.524-178.591 | 1.00 | 0.00 | CARI |
| ATOM | 3647 | C5 BGLC  | 15 | 3.843 | -11.863-180.417 | 1.00 | 2.00 | CARI |
| ATOM | 3648 | H5 BGLC  | 15 | 3.116 | -12.693-180.304 | 1.00 | 0.00 | CARI |
| ATOM | 3649 | O5 BGLC  | 15 | 3.963 | -11.114-179.195 | 1.00 | 2.00 | CARI |
| ATOM | 3650 | C2 BGLC  | 15 | 2.087 | -9.678-179.678  | 1.00 | 2.00 | CARI |
| ATOM | 3651 | H2 BGLC  | 15 | 2.660 | -8.696-179.706  | 1.00 | 0.00 | CARI |
| ATOM | 3652 | O2 BGLC  | 15 | 0.793 | -9.390-179.145  | 1.00 | 2.00 | CARI |
| ATOM | 3653 | HO2 BGLC | 15 | 0.527 | -8.475-179.134  | 1.00 | 0.00 | CARI |
| ATOM | 3654 | C3 BGLC  | 15 | 1.980 | -10.283-181.058 | 1.00 | 2.00 | CARI |
| ATOM | 3655 | H3 BGLC  | 15 | 1.256 | -11.096-181.009 | 1.00 | 0.00 | CARI |
| ATOM | 3656 | O3 BGLC  | 15 | 1.633 | -9.253-182.006  | 1.00 | 2.00 | CARI |
| ATOM | 3657 | HO3 BGLC | 15 | 0.768 | -8.874-182.015  | 1.00 | 0.00 | CARI |
| ATOM | 3658 | C4 BGLC  | 15 | 3.263 | -10.979-181.475 | 1.00 | 2.00 | CARI |
| ATOM | 3659 | H4 BGLC  | 15 | 3.976 | -10.191-181.699 | 1.00 | 0.00 | CARI |
| ATOM | 3660 | O4 BGLC  | 15 | 3.199 | -11.638-182.701 | 1.00 | 2.00 | CARI |
| ATOM | 3661 | C6 BGLC  | 15 | 5.229 | -12.388-180.725 | 1.00 | 2.00 | CARI |
| ATOM | 3662 | H61 BGLC | 15 | 5.751 | -11.485-181.201 | 1.00 | 0.00 | CARI |
| ATOM | 3663 | H62 BGLC | 15 | 5.876 | -12.647-179.893 | 1.00 | 0.00 | CARI |
| ATOM | 3664 | O6 BGLC  | 15 | 5.172 | -13.341-181.773 | 1.00 | 2.00 | CARI |
| ATOM | 3665 | HO6 BGLC | 15 | 4.588 | -14.088-181.683 | 1.00 | 0.00 | CARI |
| ATOM | 3666 | C1 BGLC  | 16 | 3.369 | -11.011-183.881 | 1.00 | 2.00 | CARI |
| ATOM | 3667 | H1 BGLC  | 16 | 4.038 | -10.164-183.784 | 1.00 | 0.00 | CARI |
| ATOM | 3668 | C5 BGLC  | 16 | 2.234 | -9.831-185.610  | 1.00 | 2.00 | CARI |
| ATOM | 3669 | H5 BGLC  | 16 | 2.960 | -9.000-185.499  | 1.00 | 0.00 | CARI |
| ATOM | 3670 | O5 BGLC  | 16 | 2.114 | -10.578-184.385 | 1.00 | 2.00 | CARI |

|      |      |     |      |    |       |         |          |      |      |      |
|------|------|-----|------|----|-------|---------|----------|------|------|------|
| ATOM | 3671 | C2  | BGLC | 16 | 3.989 | -12.014 | -184.864 | 1.00 | 2.00 | CARI |
| ATOM | 3672 | H2  | BGLC | 16 | 3.414 | -12.995 | -184.888 | 1.00 | 0.00 | CARI |
| ATOM | 3673 | O2  | BGLC | 16 | 5.285 | -12.301 | -184.331 | 1.00 | 2.00 | CARI |
| ATOM | 3674 | HO2 | BGLC | 16 | 5.551 | -13.216 | -184.317 | 1.00 | 0.00 | CARI |
| ATOM | 3675 | C3  | BGLC | 16 | 4.098 | -11.415 | -186.247 | 1.00 | 2.00 | CARI |
| ATOM | 3676 | H3  | BGLC | 16 | 4.821 | -10.601 | -186.205 | 1.00 | 0.00 | CARI |
| ATOM | 3677 | O3  | BGLC | 16 | 4.441 | -12.449 | -187.191 | 1.00 | 2.00 | CARI |
| ATOM | 3678 | HO3 | BGLC | 16 | 5.304 | -12.831 | -187.199 | 1.00 | 0.00 | CARI |
| ATOM | 3679 | C4  | BGLC | 16 | 2.811 | -10.721 | -186.665 | 1.00 | 2.00 | CARI |
| ATOM | 3680 | H4  | BGLC | 16 | 2.096 | -11.508 | -186.884 | 1.00 | 0.00 | CARI |
| ATOM | 3681 | O4  | BGLC | 16 | 2.874 | -10.066 | -187.894 | 1.00 | 2.00 | CARI |
| ATOM | 3682 | C6  | BGLC | 16 | 0.848 | -9.308  | -185.919 | 1.00 | 2.00 | CARI |
| ATOM | 3683 | H61 | BGLC | 16 | 0.326 | -10.214 | -186.389 | 1.00 | 0.00 | CARI |
| ATOM | 3684 | H62 | BGLC | 16 | 0.202 | -9.045  | -185.088 | 1.00 | 0.00 | CARI |
| ATOM | 3685 | O6  | BGLC | 16 | 0.902 | -8.361  | -186.971 | 1.00 | 2.00 | CARI |
| ATOM | 3686 | HO6 | BGLC | 16 | 1.486 | -7.613  | -186.886 | 1.00 | 0.00 | CARI |
| ATOM | 3687 | C1  | BGLC | 17 | 2.705 | -10.697 | -189.071 | 1.00 | 2.00 | CARI |
| ATOM | 3688 | H1  | BGLC | 17 | 2.036 | -11.544 | -188.972 | 1.00 | 0.00 | CARI |
| ATOM | 3689 | C5  | BGLC | 17 | 3.838 | -11.885 | -190.797 | 1.00 | 2.00 | CARI |
| ATOM | 3690 | H5  | BGLC | 17 | 3.112 | -12.716 | -190.682 | 1.00 | 0.00 | CARI |
| ATOM | 3691 | O5  | BGLC | 17 | 3.959 | -11.133 | -189.575 | 1.00 | 2.00 | CARI |
| ATOM | 3692 | C2  | BGLC | 17 | 2.082 | -9.699  | -190.058 | 1.00 | 2.00 | CARI |
| ATOM | 3693 | H2  | BGLC | 17 | 2.656 | -8.717  | -190.085 | 1.00 | 0.00 | CARI |
| ATOM | 3694 | O2  | BGLC | 17 | 0.788 | -9.410  | -189.525 | 1.00 | 2.00 | CARI |
| ATOM | 3695 | HO2 | BGLC | 17 | 0.522 | -8.495  | -189.515 | 1.00 | 0.00 | CARI |
| ATOM | 3696 | C3  | BGLC | 17 | 1.975 | -10.303 | -191.438 | 1.00 | 2.00 | CARI |
| ATOM | 3697 | H3  | BGLC | 17 | 1.252 | -11.116 | -191.389 | 1.00 | 0.00 | CARI |
| ATOM | 3698 | O3  | BGLC | 17 | 1.628 | -9.274  | -192.386 | 1.00 | 2.00 | CARI |
| ATOM | 3699 | HO3 | BGLC | 17 | 0.763 | -8.895  | -192.395 | 1.00 | 0.00 | CARI |
| ATOM | 3700 | C4  | BGLC | 17 | 3.259 | -10.999 | -191.855 | 1.00 | 2.00 | CARI |
| ATOM | 3701 | H4  | BGLC | 17 | 3.973 | -10.212 | -192.078 | 1.00 | 0.00 | CARI |
| ATOM | 3702 | O4  | BGLC | 17 | 3.195 | -11.658 | -193.081 | 1.00 | 2.00 | CARI |
| ATOM | 3703 | C6  | BGLC | 17 | 5.225 | -12.409 | -191.105 | 1.00 | 2.00 | CARI |
| ATOM | 3704 | H61 | BGLC | 17 | 5.747 | -11.505 | -191.580 | 1.00 | 0.00 | CARI |
| ATOM | 3705 | H62 | BGLC | 17 | 5.872 | -12.668 | -190.273 | 1.00 | 0.00 | CARI |
| ATOM | 3706 | O6  | BGLC | 17 | 5.169 | -13.361 | -192.153 | 1.00 | 2.00 | CARI |
| ATOM | 3707 | HO6 | BGLC | 17 | 4.585 | -14.108 | -192.064 | 1.00 | 0.00 | CARI |
| ATOM | 3708 | C1  | BGLC | 18 | 3.364 | -11.032 | -194.260 | 1.00 | 2.00 | CARI |
| ATOM | 3709 | H1  | BGLC | 18 | 4.033 | -10.185 | -194.164 | 1.00 | 0.00 | CARI |
| ATOM | 3710 | C5  | BGLC | 18 | 2.229 | -9.853  | -195.990 | 1.00 | 2.00 | CARI |
| ATOM | 3711 | H5  | BGLC | 18 | 2.956 | -9.023  | -195.881 | 1.00 | 0.00 | CARI |
| ATOM | 3712 | O5  | BGLC | 18 | 2.110 | -10.598 | -194.765 | 1.00 | 2.00 | CARI |
| ATOM | 3713 | C2  | BGLC | 18 | 3.985 | -12.034 | -195.244 | 1.00 | 2.00 | CARI |
| ATOM | 3714 | H2  | BGLC | 18 | 3.411 | -13.016 | -195.267 | 1.00 | 0.00 | CARI |
| ATOM | 3715 | O2  | BGLC | 18 | 5.281 | -12.321 | -194.711 | 1.00 | 2.00 | CARI |
| ATOM | 3716 | HO2 | BGLC | 18 | 5.547 | -13.236 | -194.698 | 1.00 | 0.00 | CARI |
| ATOM | 3717 | C3  | BGLC | 18 | 4.093 | -11.435 | -196.627 | 1.00 | 2.00 | CARI |
| ATOM | 3718 | H3  | BGLC | 18 | 4.816 | -10.621 | -196.585 | 1.00 | 0.00 | CARI |
| ATOM | 3719 | O3  | BGLC | 18 | 4.438 | -12.471 | -197.571 | 1.00 | 2.00 | CARI |
| ATOM | 3720 | HO3 | BGLC | 18 | 5.302 | -12.852 | -197.578 | 1.00 | 0.00 | CARI |
| ATOM | 3721 | C4  | BGLC | 18 | 2.807 | -10.742 | -197.045 | 1.00 | 2.00 | CARI |
| ATOM | 3722 | H4  | BGLC | 18 | 2.093 | -11.530 | -197.264 | 1.00 | 0.00 | CARI |
| ATOM | 3723 | O4  | BGLC | 18 | 2.869 | -10.088 | -198.274 | 1.00 | 2.00 | CARI |
| ATOM | 3724 | C6  | BGLC | 18 | 0.843 | -9.328  | -196.299 | 1.00 | 2.00 | CARI |

|      |      |     |      |    |        |                 |      |      |      |
|------|------|-----|------|----|--------|-----------------|------|------|------|
| ATOM | 3725 | H61 | BGLC | 18 | 0.320  | -10.233-196.769 | 1.00 | 0.00 | CARI |
| ATOM | 3726 | H62 | BGLC | 18 | 0.197  | -9.064-195.468  | 1.00 | 0.00 | CARI |
| ATOM | 3727 | O6  | BGLC | 18 | 0.899  | -8.381-197.351  | 1.00 | 2.00 | CARI |
| ATOM | 3728 | HO6 | BGLC | 18 | 1.484  | -7.634-197.266  | 1.00 | 0.00 | CARI |
| ATOM | 3729 | C1  | BGLC | 19 | 2.700  | -10.718-199.451 | 1.00 | 2.00 | CARI |
| ATOM | 3730 | H1  | BGLC | 19 | 2.031  | -11.565-199.352 | 1.00 | 0.00 | CARI |
| ATOM | 3731 | C5  | BGLC | 19 | 3.833  | -11.906-201.177 | 1.00 | 2.00 | CARI |
| ATOM | 3732 | H5  | BGLC | 19 | 3.107  | -12.737-201.062 | 1.00 | 0.00 | CARI |
| ATOM | 3733 | O5  | BGLC | 19 | 3.954  | -11.154-199.955 | 1.00 | 2.00 | CARI |
| ATOM | 3734 | C2  | BGLC | 19 | 2.079  | -9.720-200.438  | 1.00 | 2.00 | CARI |
| ATOM | 3735 | H2  | BGLC | 19 | 2.653  | -8.738-200.466  | 1.00 | 0.00 | CARI |
| ATOM | 3736 | O2  | BGLC | 19 | 0.783  | -9.431-199.905  | 1.00 | 2.00 | CARI |
| ATOM | 3737 | HO2 | BGLC | 19 | 0.517  | -8.516-199.895  | 1.00 | 0.00 | CARI |
| ATOM | 3738 | C3  | BGLC | 19 | 1.970  | -10.324-201.818 | 1.00 | 2.00 | CARI |
| ATOM | 3739 | H3  | BGLC | 19 | 1.247  | -11.137-201.771 | 1.00 | 0.00 | CARI |
| ATOM | 3740 | O3  | BGLC | 19 | 1.624  | -9.294-202.766  | 1.00 | 2.00 | CARI |
| ATOM | 3741 | HO3 | BGLC | 19 | 0.760  | -8.914-202.774  | 1.00 | 0.00 | CARI |
| ATOM | 3742 | C4  | BGLC | 19 | 3.256  | -11.020-202.234 | 1.00 | 2.00 | CARI |
| ATOM | 3743 | H4  | BGLC | 19 | 3.971  | -10.234-202.457 | 1.00 | 0.00 | CARI |
| ATOM | 3744 | O4  | BGLC | 19 | 3.190  | -11.679-203.461 | 1.00 | 2.00 | CARI |
| ATOM | 3745 | C6  | BGLC | 19 | 5.220  | -12.430-201.485 | 1.00 | 2.00 | CARI |
| ATOM | 3746 | H61 | BGLC | 19 | 5.742  | -11.526-201.960 | 1.00 | 0.00 | CARI |
| ATOM | 3747 | H62 | BGLC | 19 | 5.867  | -12.689-200.653 | 1.00 | 0.00 | CARI |
| ATOM | 3748 | O6  | BGLC | 19 | 5.164  | -13.382-202.533 | 1.00 | 2.00 | CARI |
| ATOM | 3749 | HO6 | BGLC | 19 | 4.580  | -14.129-202.444 | 1.00 | 0.00 | CARI |
| ATOM | 3750 | C1  | BGLC | 20 | 3.360  | -11.052-204.640 | 1.00 | 2.00 | CARI |
| ATOM | 3751 | H1  | BGLC | 20 | 4.029  | -10.205-204.543 | 1.00 | 0.00 | CARI |
| ATOM | 3752 | C5  | BGLC | 20 | 2.224  | -9.873-206.370  | 1.00 | 2.00 | CARI |
| ATOM | 3753 | H5  | BGLC | 20 | 2.951  | -9.042-206.260  | 1.00 | 0.00 | CARI |
| ATOM | 3754 | O5  | BGLC | 20 | 2.105  | -10.619-205.145 | 1.00 | 2.00 | CARI |
| ATOM | 3755 | C2  | BGLC | 20 | 3.980  | -12.054-205.624 | 1.00 | 2.00 | CARI |
| ATOM | 3756 | H2  | BGLC | 20 | 3.405  | -13.035-205.647 | 1.00 | 0.00 | CARI |
| ATOM | 3757 | O2  | BGLC | 20 | 5.276  | -12.342-205.091 | 1.00 | 2.00 | CARI |
| ATOM | 3758 | HO2 | BGLC | 20 | 5.542  | -13.257-205.078 | 1.00 | 0.00 | CARI |
| ATOM | 3759 | C3  | BGLC | 20 | 4.088  | -11.456-207.007 | 1.00 | 2.00 | CARI |
| ATOM | 3760 | H3  | BGLC | 20 | 4.811  | -10.642-206.963 | 1.00 | 0.00 | CARI |
| ATOM | 3761 | O3  | BGLC | 20 | 4.434  | -12.490-207.951 | 1.00 | 2.00 | CARI |
| ATOM | 3762 | HO3 | BGLC | 20 | 5.298  | -12.870-207.958 | 1.00 | 0.00 | CARI |
| ATOM | 3763 | C4  | BGLC | 20 | 2.802  | -10.762-207.425 | 1.00 | 2.00 | CARI |
| ATOM | 3764 | H4  | BGLC | 20 | 2.051  | -11.490-207.715 | 1.00 | 0.00 | CARI |
| ATOM | 3765 | O4  | BGLC | 20 | 2.973  | -10.018-208.645 | 1.00 | 2.00 | CARI |
| ATOM | 3766 | HO4 | BGLC | 20 | 3.436  | -10.585-209.313 | 1.00 | 0.00 | CARI |
| ATOM | 3767 | C6  | BGLC | 20 | 0.839  | -9.349-206.679  | 1.00 | 2.00 | CARI |
| ATOM | 3768 | H61 | BGLC | 20 | 0.316  | -10.255-207.149 | 1.00 | 0.00 | CARI |
| ATOM | 3769 | H62 | BGLC | 20 | 0.193  | -9.085-205.848  | 1.00 | 0.00 | CARI |
| ATOM | 3770 | O6  | BGLC | 20 | 0.894  | -8.402-207.731  | 1.00 | 2.00 | CARI |
| ATOM | 3771 | HO6 | BGLC | 20 | 1.478  | -7.655-207.646  | 1.00 | 0.00 | CARI |
| ATOM | 3772 | C1  | BGLC | 1  | -3.502 | 10.969-103.361  | 1.00 | 2.00 | CARI |
| ATOM | 3773 | H1  | BGLC | 1  | -4.346 | 10.299-103.252  | 1.00 | 0.00 | CARI |
| ATOM | 3774 | O1  | BGLC | 1  | -3.180 | 11.681-102.169  | 1.00 | 2.00 | CARI |
| ATOM | 3775 | HO1 | BGLC | 1  | -2.673 | 12.419-102.430  | 1.00 | 0.00 | CARI |
| ATOM | 3776 | C5  | BGLC | 1  | -2.333 | 9.793-105.077   | 1.00 | 2.00 | CARI |
| ATOM | 3777 | H5  | BGLC | 1  | -3.033 | 8.933-105.118   | 1.00 | 0.00 | CARI |
| ATOM | 3778 | O5  | BGLC | 1  | -2.303 | 10.360-103.781  | 1.00 | 2.00 | CARI |

|      |      |     |      |   |        |                |      |      |      |
|------|------|-----|------|---|--------|----------------|------|------|------|
| ATOM | 3779 | C2  | BGLC | 1 | -3.977 | 12.027-104.348 | 1.00 | 2.00 | CARJ |
| ATOM | 3780 | H2  | BGLC | 1 | -3.201 | 12.859-104.350 | 1.00 | 0.00 | CARJ |
| ATOM | 3781 | O2  | BGLC | 1 | -5.200 | 12.605-103.907 | 1.00 | 2.00 | CARJ |
| ATOM | 3782 | HO2 | BGLC | 1 | -5.272 | 13.553-103.963 | 1.00 | 0.00 | CARJ |
| ATOM | 3783 | C3  | BGLC | 1 | -4.126 | 11.419-105.727 | 1.00 | 2.00 | CARJ |
| ATOM | 3784 | H3  | BGLC | 1 | -4.793 | 10.558-105.720 | 1.00 | 0.00 | CARJ |
| ATOM | 3785 | O3  | BGLC | 1 | -4.562 | 12.439-106.607 | 1.00 | 2.00 | CARJ |
| ATOM | 3786 | HO3 | BGLC | 1 | -5.441 | 12.779-106.556 | 1.00 | 0.00 | CARJ |
| ATOM | 3787 | C4  | BGLC | 1 | -2.774 | 10.818-106.131 | 1.00 | 2.00 | CARJ |
| ATOM | 3788 | H4  | BGLC | 1 | -2.012 | 11.587-106.208 | 1.00 | 0.00 | CARJ |
| ATOM | 3789 | O4  | BGLC | 1 | -2.732 | 10.270-107.412 | 1.00 | 2.00 | CARJ |
| ATOM | 3790 | C6  | BGLC | 1 | -0.861 | 9.358-105.350  | 1.00 | 2.00 | CARJ |
| ATOM | 3791 | H61 | BGLC | 1 | -0.416 | 10.283-105.862 | 1.00 | 0.00 | CARJ |
| ATOM | 3792 | H62 | BGLC | 1 | -0.207 | 9.198-104.499  | 1.00 | 0.00 | CARJ |
| ATOM | 3793 | O6  | BGLC | 1 | -0.802 | 8.352-106.341  | 1.00 | 2.00 | CARJ |
| ATOM | 3794 | HO6 | BGLC | 1 | -1.316 | 7.559-106.222  | 1.00 | 0.00 | CARJ |
| ATOM | 3795 | C1  | BGLC | 2 | -2.572 | 10.786-108.551 | 1.00 | 2.00 | CARJ |
| ATOM | 3796 | H1  | BGLC | 2 | -1.771 | 11.515-108.544 | 1.00 | 0.00 | CARJ |
| ATOM | 3797 | C5  | BGLC | 2 | -3.740 | 11.955-110.271 | 1.00 | 2.00 | CARJ |
| ATOM | 3798 | H5  | BGLC | 2 | -3.040 | 12.814-110.318 | 1.00 | 0.00 | CARJ |
| ATOM | 3799 | O5  | BGLC | 2 | -3.768 | 11.394-108.972 | 1.00 | 2.00 | CARJ |
| ATOM | 3800 | C2  | BGLC | 2 | -2.094 | 9.723-109.534  | 1.00 | 2.00 | CARJ |
| ATOM | 3801 | H2  | BGLC | 2 | -2.870 | 8.891-109.532  | 1.00 | 0.00 | CARJ |
| ATOM | 3802 | O2  | BGLC | 2 | -0.871 | 9.146-109.092  | 1.00 | 2.00 | CARJ |
| ATOM | 3803 | HO2 | BGLC | 2 | -0.799 | 8.197-109.145  | 1.00 | 0.00 | CARJ |
| ATOM | 3804 | C3  | BGLC | 2 | -1.947 | 10.327-110.916 | 1.00 | 2.00 | CARJ |
| ATOM | 3805 | H3  | BGLC | 2 | -1.281 | 11.190-110.916 | 1.00 | 0.00 | CARJ |
| ATOM | 3806 | O3  | BGLC | 2 | -1.514 | 9.302-111.792  | 1.00 | 2.00 | CARJ |
| ATOM | 3807 | HO3 | BGLC | 2 | -0.635 | 8.960-111.741  | 1.00 | 0.00 | CARJ |
| ATOM | 3808 | C4  | BGLC | 2 | -3.301 | 10.923-111.321 | 1.00 | 2.00 | CARJ |
| ATOM | 3809 | H4  | BGLC | 2 | -4.066 | 10.156-111.395 | 1.00 | 0.00 | CARJ |
| ATOM | 3810 | O4  | BGLC | 2 | -3.341 | 11.466-112.605 | 1.00 | 2.00 | CARJ |
| ATOM | 3811 | C6  | BGLC | 2 | -5.211 | 12.389-110.544 | 1.00 | 2.00 | CARJ |
| ATOM | 3812 | H61 | BGLC | 2 | -5.657 | 11.462-111.051 | 1.00 | 0.00 | CARJ |
| ATOM | 3813 | H62 | BGLC | 2 | -5.864 | 12.553-109.693 | 1.00 | 0.00 | CARJ |
| ATOM | 3814 | O6  | BGLC | 2 | -5.271 | 13.390-111.539 | 1.00 | 2.00 | CARJ |
| ATOM | 3815 | HO6 | BGLC | 2 | -4.757 | 14.183-111.424 | 1.00 | 0.00 | CARJ |
| ATOM | 3816 | C1  | BGLC | 3 | -3.507 | 10.948-113.741 | 1.00 | 2.00 | CARJ |
| ATOM | 3817 | H1  | BGLC | 3 | -4.309 | 10.220-113.728 | 1.00 | 0.00 | CARJ |
| ATOM | 3818 | C5  | BGLC | 3 | -2.336 | 9.772-115.457  | 1.00 | 2.00 | CARJ |
| ATOM | 3819 | H5  | BGLC | 3 | -3.036 | 8.913-115.499  | 1.00 | 0.00 | CARJ |
| ATOM | 3820 | O5  | BGLC | 3 | -2.307 | 10.338-114.161 | 1.00 | 2.00 | CARJ |
| ATOM | 3821 | C2  | BGLC | 3 | -3.981 | 12.007-114.728 | 1.00 | 2.00 | CARJ |
| ATOM | 3822 | H2  | BGLC | 3 | -3.205 | 12.839-114.730 | 1.00 | 0.00 | CARJ |
| ATOM | 3823 | O2  | BGLC | 3 | -5.204 | 12.585-114.287 | 1.00 | 2.00 | CARJ |
| ATOM | 3824 | HO2 | BGLC | 3 | -5.276 | 13.533-114.342 | 1.00 | 0.00 | CARJ |
| ATOM | 3825 | C3  | BGLC | 3 | -4.130 | 11.399-116.107 | 1.00 | 2.00 | CARJ |
| ATOM | 3826 | H3  | BGLC | 3 | -4.797 | 10.538-116.099 | 1.00 | 0.00 | CARJ |
| ATOM | 3827 | O3  | BGLC | 3 | -4.565 | 12.418-116.987 | 1.00 | 2.00 | CARJ |
| ATOM | 3828 | HO3 | BGLC | 3 | -5.444 | 12.759-116.936 | 1.00 | 0.00 | CARJ |
| ATOM | 3829 | C4  | BGLC | 3 | -2.778 | 10.797-116.511 | 1.00 | 2.00 | CARJ |
| ATOM | 3830 | H4  | BGLC | 3 | -2.016 | 11.566-116.588 | 1.00 | 0.00 | CARJ |
| ATOM | 3831 | O4  | BGLC | 3 | -2.737 | 10.250-117.792 | 1.00 | 2.00 | CARJ |
| ATOM | 3832 | C6  | BGLC | 3 | -0.866 | 9.337-115.730  | 1.00 | 2.00 | CARJ |

|      |      |     |      |   |        |                |      |      |      |
|------|------|-----|------|---|--------|----------------|------|------|------|
| ATOM | 3833 | H61 | BGLC | 3 | -0.421 | 10.262-116.242 | 1.00 | 0.00 | CARJ |
| ATOM | 3834 | H62 | BGLC | 3 | -0.212 | 9.178-114.879  | 1.00 | 0.00 | CARJ |
| ATOM | 3835 | O6  | BGLC | 3 | -0.807 | 8.330-116.721  | 1.00 | 2.00 | CARJ |
| ATOM | 3836 | HO6 | BGLC | 3 | -1.321 | 7.538-116.601  | 1.00 | 0.00 | CARJ |
| ATOM | 3837 | C1  | BGLC | 4 | -2.576 | 10.764-118.931 | 1.00 | 2.00 | CARJ |
| ATOM | 3838 | H1  | BGLC | 4 | -1.774 | 11.492-118.925 | 1.00 | 0.00 | CARJ |
| ATOM | 3839 | C5  | BGLC | 4 | -3.745 | 11.935-120.651 | 1.00 | 2.00 | CARJ |
| ATOM | 3840 | H5  | BGLC | 4 | -3.046 | 12.795-120.697 | 1.00 | 0.00 | CARJ |
| ATOM | 3841 | O5  | BGLC | 4 | -3.772 | 11.373-119.352 | 1.00 | 2.00 | CARJ |
| ATOM | 3842 | C2  | BGLC | 4 | -2.099 | 9.702-119.914  | 1.00 | 2.00 | CARJ |
| ATOM | 3843 | H2  | BGLC | 4 | -2.875 | 8.870-119.911  | 1.00 | 0.00 | CARJ |
| ATOM | 3844 | O2  | BGLC | 4 | -0.875 | 9.125-119.472  | 1.00 | 2.00 | CARJ |
| ATOM | 3845 | HO2 | BGLC | 4 | -0.803 | 8.177-119.525  | 1.00 | 0.00 | CARJ |
| ATOM | 3846 | C3  | BGLC | 4 | -1.952 | 10.305-121.296 | 1.00 | 2.00 | CARJ |
| ATOM | 3847 | H3  | BGLC | 4 | -1.286 | 11.167-121.294 | 1.00 | 0.00 | CARJ |
| ATOM | 3848 | O3  | BGLC | 4 | -1.518 | 9.282-122.172  | 1.00 | 2.00 | CARJ |
| ATOM | 3849 | HO3 | BGLC | 4 | -0.639 | 8.941-122.121  | 1.00 | 0.00 | CARJ |
| ATOM | 3850 | C4  | BGLC | 4 | -3.305 | 10.902-121.701 | 1.00 | 2.00 | CARJ |
| ATOM | 3851 | H4  | BGLC | 4 | -4.069 | 10.134-121.775 | 1.00 | 0.00 | CARJ |
| ATOM | 3852 | O4  | BGLC | 4 | -3.345 | 11.445-122.985 | 1.00 | 2.00 | CARJ |
| ATOM | 3853 | C6  | BGLC | 4 | -5.216 | 12.367-120.924 | 1.00 | 2.00 | CARJ |
| ATOM | 3854 | H61 | BGLC | 4 | -5.661 | 11.441-121.433 | 1.00 | 0.00 | CARJ |
| ATOM | 3855 | H62 | BGLC | 4 | -5.870 | 12.529-120.073 | 1.00 | 0.00 | CARJ |
| ATOM | 3856 | O6  | BGLC | 4 | -5.275 | 13.370-121.919 | 1.00 | 2.00 | CARJ |
| ATOM | 3857 | HO6 | BGLC | 4 | -4.761 | 14.163-121.802 | 1.00 | 0.00 | CARJ |
| ATOM | 3858 | C1  | BGLC | 5 | -3.511 | 10.927-124.121 | 1.00 | 2.00 | CARJ |
| ATOM | 3859 | H1  | BGLC | 5 | -4.313 | 10.199-124.108 | 1.00 | 0.00 | CARJ |
| ATOM | 3860 | C5  | BGLC | 5 | -2.341 | 9.752-125.837  | 1.00 | 2.00 | CARJ |
| ATOM | 3861 | H5  | BGLC | 5 | -3.041 | 8.893-125.880  | 1.00 | 0.00 | CARJ |
| ATOM | 3862 | O5  | BGLC | 5 | -2.312 | 10.317-124.541 | 1.00 | 2.00 | CARJ |
| ATOM | 3863 | C2  | BGLC | 5 | -3.985 | 11.986-125.108 | 1.00 | 2.00 | CARJ |
| ATOM | 3864 | H2  | BGLC | 5 | -3.210 | 12.818-125.110 | 1.00 | 0.00 | CARJ |
| ATOM | 3865 | O2  | BGLC | 5 | -5.209 | 12.564-124.667 | 1.00 | 2.00 | CARJ |
| ATOM | 3866 | HO2 | BGLC | 5 | -5.281 | 13.512-124.722 | 1.00 | 0.00 | CARJ |
| ATOM | 3867 | C3  | BGLC | 5 | -4.134 | 11.378-126.487 | 1.00 | 2.00 | CARJ |
| ATOM | 3868 | H3  | BGLC | 5 | -4.801 | 10.517-126.479 | 1.00 | 0.00 | CARJ |
| ATOM | 3869 | O3  | BGLC | 5 | -4.569 | 12.397-127.367 | 1.00 | 2.00 | CARJ |
| ATOM | 3870 | HO3 | BGLC | 5 | -5.448 | 12.738-127.316 | 1.00 | 0.00 | CARJ |
| ATOM | 3871 | C4  | BGLC | 5 | -2.782 | 10.776-126.891 | 1.00 | 2.00 | CARJ |
| ATOM | 3872 | H4  | BGLC | 5 | -2.020 | 11.545-126.968 | 1.00 | 0.00 | CARJ |
| ATOM | 3873 | O4  | BGLC | 5 | -2.741 | 10.230-128.172 | 1.00 | 2.00 | CARJ |
| ATOM | 3874 | C6  | BGLC | 5 | -0.870 | 9.316-126.110  | 1.00 | 2.00 | CARJ |
| ATOM | 3875 | H61 | BGLC | 5 | -0.425 | 10.241-126.621 | 1.00 | 0.00 | CARJ |
| ATOM | 3876 | H62 | BGLC | 5 | -0.216 | 9.156-125.259  | 1.00 | 0.00 | CARJ |
| ATOM | 3877 | O6  | BGLC | 5 | -0.810 | 8.310-127.101  | 1.00 | 2.00 | CARJ |
| ATOM | 3878 | HO6 | BGLC | 5 | -1.324 | 7.517-126.982  | 1.00 | 0.00 | CARJ |
| ATOM | 3879 | C1  | BGLC | 6 | -2.580 | 10.743-129.311 | 1.00 | 2.00 | CARJ |
| ATOM | 3880 | H1  | BGLC | 6 | -1.778 | 11.472-129.305 | 1.00 | 0.00 | CARJ |
| ATOM | 3881 | C5  | BGLC | 6 | -3.750 | 11.914-131.031 | 1.00 | 2.00 | CARJ |
| ATOM | 3882 | H5  | BGLC | 6 | -3.051 | 12.774-131.077 | 1.00 | 0.00 | CARJ |
| ATOM | 3883 | O5  | BGLC | 6 | -3.777 | 11.351-129.732 | 1.00 | 2.00 | CARJ |
| ATOM | 3884 | C2  | BGLC | 6 | -2.104 | 9.681-130.294  | 1.00 | 2.00 | CARJ |
| ATOM | 3885 | H2  | BGLC | 6 | -2.880 | 8.849-130.293  | 1.00 | 0.00 | CARJ |
| ATOM | 3886 | O2  | BGLC | 6 | -0.879 | 9.104-129.852  | 1.00 | 2.00 | CARJ |



|      |      |     |      |   |        |                |      |      |      |
|------|------|-----|------|---|--------|----------------|------|------|------|
| ATOM | 3887 | HO2 | BGLC | 6 | -0.807 | 8.155-129.905  | 1.00 | 0.00 | CARJ |
| ATOM | 3888 | C3  | BGLC | 6 | -1.955 | 10.285-131.676 | 1.00 | 2.00 | CARJ |
| ATOM | 3889 | H3  | BGLC | 6 | -1.289 | 11.147-131.675 | 1.00 | 0.00 | CARJ |
| ATOM | 3890 | O3  | BGLC | 6 | -1.523 | 9.262-132.552  | 1.00 | 2.00 | CARJ |
| ATOM | 3891 | HO3 | BGLC | 6 | -0.645 | 8.919-132.501  | 1.00 | 0.00 | CARJ |
| ATOM | 3892 | C4  | BGLC | 6 | -3.310 | 10.882-132.081 | 1.00 | 2.00 | CARJ |
| ATOM | 3893 | H4  | BGLC | 6 | -4.074 | 10.114-132.155 | 1.00 | 0.00 | CARJ |
| ATOM | 3894 | O4  | BGLC | 6 | -3.350 | 11.423-133.365 | 1.00 | 2.00 | CARJ |
| ATOM | 3895 | C6  | BGLC | 6 | -5.219 | 12.347-131.304 | 1.00 | 2.00 | CARJ |
| ATOM | 3896 | O61 | BGLC | 6 | -5.312 | 13.739-131.547 | 1.00 | 0.00 | CARJ |
| ATOM | 3897 | O62 | BGLC | 6 | -5.862 | 11.464-131.246 | 1.00 | 0.00 | CARJ |
| ATOM | 3898 | C1  | BGLC | 7 | -3.514 | 10.906-134.501 | 1.00 | 2.00 | CARJ |
| ATOM | 3899 | H1  | BGLC | 7 | -4.316 | 10.177-134.490 | 1.00 | 0.00 | CARJ |
| ATOM | 3900 | C5  | BGLC | 7 | -2.346 | 9.730-136.217  | 1.00 | 2.00 | CARJ |
| ATOM | 3901 | H5  | BGLC | 7 | -3.046 | 8.870-136.258  | 1.00 | 0.00 | CARJ |
| ATOM | 3902 | O5  | BGLC | 7 | -2.316 | 10.297-134.921 | 1.00 | 2.00 | CARJ |
| ATOM | 3903 | C2  | BGLC | 7 | -3.989 | 11.966-135.488 | 1.00 | 2.00 | CARJ |
| ATOM | 3904 | H2  | BGLC | 7 | -3.214 | 12.799-135.491 | 1.00 | 0.00 | CARJ |
| ATOM | 3905 | O2  | BGLC | 7 | -5.213 | 12.543-135.047 | 1.00 | 2.00 | CARJ |
| ATOM | 3906 | HO2 | BGLC | 7 | -5.285 | 13.491-135.102 | 1.00 | 0.00 | CARJ |
| ATOM | 3907 | C3  | BGLC | 7 | -4.139 | 11.357-136.867 | 1.00 | 2.00 | CARJ |
| ATOM | 3908 | H3  | BGLC | 7 | -4.806 | 10.496-136.860 | 1.00 | 0.00 | CARJ |
| ATOM | 3909 | O3  | BGLC | 7 | -4.574 | 12.376-137.747 | 1.00 | 2.00 | CARJ |
| ATOM | 3910 | HO3 | BGLC | 7 | -5.453 | 12.717-137.696 | 1.00 | 0.00 | CARJ |
| ATOM | 3911 | C4  | BGLC | 7 | -2.787 | 10.756-137.271 | 1.00 | 2.00 | CARJ |
| ATOM | 3912 | H4  | BGLC | 7 | -2.024 | 11.525-137.348 | 1.00 | 0.00 | CARJ |
| ATOM | 3913 | O4  | BGLC | 7 | -2.746 | 10.209-138.552 | 1.00 | 2.00 | CARJ |
| ATOM | 3914 | C6  | BGLC | 7 | -0.875 | 9.296-136.490  | 1.00 | 2.00 | CARJ |
| ATOM | 3915 | H61 | BGLC | 7 | -0.431 | 10.221-137.002 | 1.00 | 0.00 | CARJ |
| ATOM | 3916 | H62 | BGLC | 7 | -0.220 | 9.137-135.639  | 1.00 | 0.00 | CARJ |
| ATOM | 3917 | O6  | BGLC | 7 | -0.815 | 8.289-137.481  | 1.00 | 2.00 | CARJ |
| ATOM | 3918 | HO6 | BGLC | 7 | -1.328 | 7.496-137.361  | 1.00 | 0.00 | CARJ |
| ATOM | 3919 | C1  | BGLC | 8 | -2.584 | 10.723-139.691 | 1.00 | 2.00 | CARJ |
| ATOM | 3920 | H1  | BGLC | 8 | -1.782 | 11.452-139.684 | 1.00 | 0.00 | CARJ |
| ATOM | 3921 | C5  | BGLC | 8 | -3.753 | 11.894-141.411 | 1.00 | 2.00 | CARJ |
| ATOM | 3922 | H5  | BGLC | 8 | -3.054 | 12.754-141.457 | 1.00 | 0.00 | CARJ |
| ATOM | 3923 | O5  | BGLC | 8 | -3.780 | 11.331-140.112 | 1.00 | 2.00 | CARJ |
| ATOM | 3924 | C2  | BGLC | 8 | -2.109 | 9.660-140.674  | 1.00 | 2.00 | CARJ |
| ATOM | 3925 | H2  | BGLC | 8 | -2.885 | 8.828-140.673  | 1.00 | 0.00 | CARJ |
| ATOM | 3926 | O2  | BGLC | 8 | -0.884 | 9.083-140.232  | 1.00 | 2.00 | CARJ |
| ATOM | 3927 | HO2 | BGLC | 8 | -0.812 | 8.134-140.284  | 1.00 | 0.00 | CARJ |
| ATOM | 3928 | C3  | BGLC | 8 | -1.961 | 10.264-142.056 | 1.00 | 2.00 | CARJ |
| ATOM | 3929 | H3  | BGLC | 8 | -1.295 | 11.126-142.054 | 1.00 | 0.00 | CARJ |
| ATOM | 3930 | O3  | BGLC | 8 | -1.527 | 9.240-142.932  | 1.00 | 2.00 | CARJ |
| ATOM | 3931 | HO3 | BGLC | 8 | -0.648 | 8.899-142.880  | 1.00 | 0.00 | CARJ |
| ATOM | 3932 | C4  | BGLC | 8 | -3.314 | 10.862-142.461 | 1.00 | 2.00 | CARJ |
| ATOM | 3933 | H4  | BGLC | 8 | -4.078 | 10.094-142.534 | 1.00 | 0.00 | CARJ |
| ATOM | 3934 | O4  | BGLC | 8 | -3.354 | 11.402-143.745 | 1.00 | 2.00 | CARJ |
| ATOM | 3935 | C6  | BGLC | 8 | -5.224 | 12.326-141.684 | 1.00 | 2.00 | CARJ |
| ATOM | 3936 | H61 | BGLC | 8 | -5.668 | 11.399-142.191 | 1.00 | 0.00 | CARJ |
| ATOM | 3937 | H62 | BGLC | 8 | -5.878 | 12.488-140.833 | 1.00 | 0.00 | CARJ |
| ATOM | 3938 | O6  | BGLC | 8 | -5.285 | 13.328-142.679 | 1.00 | 2.00 | CARJ |
| ATOM | 3939 | HO6 | BGLC | 8 | -4.772 | 14.121-142.563 | 1.00 | 0.00 | CARJ |
| ATOM | 3940 | C1  | BGLC | 9 | -3.519 | 10.886-144.881 | 1.00 | 2.00 | CARJ |

|      |      |     |      |    |        |                |      |      |      |
|------|------|-----|------|----|--------|----------------|------|------|------|
| ATOM | 3941 | H1  | BGLC | 9  | -4.322 | 10.158-144.870 | 1.00 | 0.00 | CARJ |
| ATOM | 3942 | C5  | BGLC | 9  | -2.350 | 9.710-146.597  | 1.00 | 2.00 | CARJ |
| ATOM | 3943 | H5  | BGLC | 9  | -3.050 | 8.851-146.640  | 1.00 | 0.00 | CARJ |
| ATOM | 3944 | O5  | BGLC | 9  | -2.321 | 10.276-145.300 | 1.00 | 2.00 | CARJ |
| ATOM | 3945 | C2  | BGLC | 9  | -3.994 | 11.945-145.868 | 1.00 | 2.00 | CARJ |
| ATOM | 3946 | H2  | BGLC | 9  | -3.219 | 12.778-145.871 | 1.00 | 0.00 | CARJ |
| ATOM | 3947 | O2  | BGLC | 9  | -5.218 | 12.522-145.427 | 1.00 | 2.00 | CARJ |
| ATOM | 3948 | HO2 | BGLC | 9  | -5.290 | 13.470-145.482 | 1.00 | 0.00 | CARJ |
| ATOM | 3949 | C3  | BGLC | 9  | -4.143 | 11.336-147.247 | 1.00 | 2.00 | CARJ |
| ATOM | 3950 | H3  | BGLC | 9  | -4.810 | 10.474-147.240 | 1.00 | 0.00 | CARJ |
| ATOM | 3951 | O3  | BGLC | 9  | -4.579 | 12.356-148.127 | 1.00 | 2.00 | CARJ |
| ATOM | 3952 | HO3 | BGLC | 9  | -5.458 | 12.697-148.076 | 1.00 | 0.00 | CARJ |
| ATOM | 3953 | C4  | BGLC | 9  | -2.791 | 10.736-147.651 | 1.00 | 2.00 | CARJ |
| ATOM | 3954 | H4  | BGLC | 9  | -2.028 | 11.504-147.729 | 1.00 | 0.00 | CARJ |
| ATOM | 3955 | O4  | BGLC | 9  | -2.751 | 10.188-148.932 | 1.00 | 2.00 | CARJ |
| ATOM | 3956 | C6  | BGLC | 9  | -0.880 | 9.274-146.870  | 1.00 | 2.00 | CARJ |
| ATOM | 3957 | H61 | BGLC | 9  | -0.435 | 10.200-147.380 | 1.00 | 0.00 | CARJ |
| ATOM | 3958 | H62 | BGLC | 9  | -0.226 | 9.113-146.019  | 1.00 | 0.00 | CARJ |
| ATOM | 3959 | O6  | BGLC | 9  | -0.820 | 8.270-147.861  | 1.00 | 2.00 | CARJ |
| ATOM | 3960 | HO6 | BGLC | 9  | -1.334 | 7.477-147.743  | 1.00 | 0.00 | CARJ |
| ATOM | 3961 | C1  | BGLC | 10 | -2.589 | 10.702-150.071 | 1.00 | 2.00 | CARJ |
| ATOM | 3962 | H1  | BGLC | 10 | -1.787 | 11.431-150.064 | 1.00 | 0.00 | CARJ |
| ATOM | 3963 | C5  | BGLC | 10 | -3.758 | 11.873-151.791 | 1.00 | 2.00 | CARJ |
| ATOM | 3964 | H5  | BGLC | 10 | -3.059 | 12.733-151.837 | 1.00 | 0.00 | CARJ |
| ATOM | 3965 | O5  | BGLC | 10 | -3.785 | 11.310-150.492 | 1.00 | 2.00 | CARJ |
| ATOM | 3966 | C2  | BGLC | 10 | -2.112 | 9.640-151.054  | 1.00 | 2.00 | CARJ |
| ATOM | 3967 | H2  | BGLC | 10 | -2.888 | 8.808-151.051  | 1.00 | 0.00 | CARJ |
| ATOM | 3968 | O2  | BGLC | 10 | -0.889 | 9.063-150.612  | 1.00 | 2.00 | CARJ |
| ATOM | 3969 | HO2 | BGLC | 10 | -0.817 | 8.114-150.665  | 1.00 | 0.00 | CARJ |
| ATOM | 3970 | C3  | BGLC | 10 | -1.965 | 10.242-152.436 | 1.00 | 2.00 | CARJ |
| ATOM | 3971 | H3  | BGLC | 10 | -1.299 | 11.104-152.433 | 1.00 | 0.00 | CARJ |
| ATOM | 3972 | O3  | BGLC | 10 | -1.531 | 9.220-153.312  | 1.00 | 2.00 | CARJ |
| ATOM | 3973 | HO3 | BGLC | 10 | -0.652 | 8.880-153.261  | 1.00 | 0.00 | CARJ |
| ATOM | 3974 | C4  | BGLC | 10 | -3.319 | 10.841-152.841 | 1.00 | 2.00 | CARJ |
| ATOM | 3975 | H4  | BGLC | 10 | -4.084 | 10.074-152.915 | 1.00 | 0.00 | CARJ |
| ATOM | 3976 | O4  | BGLC | 10 | -3.358 | 11.382-154.125 | 1.00 | 2.00 | CARJ |
| ATOM | 3977 | C6  | BGLC | 10 | -5.229 | 12.306-152.064 | 1.00 | 2.00 | CARJ |
| ATOM | 3978 | O61 | BGLC | 10 | -5.322 | 13.698-152.308 | 1.00 | 0.00 | CARJ |
| ATOM | 3979 | O62 | BGLC | 10 | -5.872 | 11.422-152.005 | 1.00 | 0.00 | CARJ |
| ATOM | 3980 | C1  | BGLC | 11 | -3.524 | 10.865-155.261 | 1.00 | 2.00 | CARJ |
| ATOM | 3981 | H1  | BGLC | 11 | -4.327 | 10.137-155.249 | 1.00 | 0.00 | CARJ |
| ATOM | 3982 | C5  | BGLC | 11 | -2.355 | 9.689-156.977  | 1.00 | 2.00 | CARJ |
| ATOM | 3983 | H5  | BGLC | 11 | -3.055 | 8.830-157.019  | 1.00 | 0.00 | CARJ |
| ATOM | 3984 | O5  | BGLC | 11 | -2.324 | 10.255-155.680 | 1.00 | 2.00 | CARJ |
| ATOM | 3985 | C2  | BGLC | 11 | -3.999 | 11.923-156.248 | 1.00 | 2.00 | CARJ |
| ATOM | 3986 | H2  | BGLC | 11 | -3.223 | 12.755-156.250 | 1.00 | 0.00 | CARJ |
| ATOM | 3987 | O2  | BGLC | 11 | -5.223 | 12.502-155.807 | 1.00 | 2.00 | CARJ |
| ATOM | 3988 | HO2 | BGLC | 11 | -5.295 | 13.450-155.863 | 1.00 | 0.00 | CARJ |
| ATOM | 3989 | C3  | BGLC | 11 | -4.148 | 11.315-157.627 | 1.00 | 2.00 | CARJ |
| ATOM | 3990 | H3  | BGLC | 11 | -4.815 | 10.454-157.620 | 1.00 | 0.00 | CARJ |
| ATOM | 3991 | O3  | BGLC | 11 | -4.584 | 12.335-158.507 | 1.00 | 2.00 | CARJ |
| ATOM | 3992 | HO3 | BGLC | 11 | -5.463 | 12.675-158.456 | 1.00 | 0.00 | CARJ |
| ATOM | 3993 | C4  | BGLC | 11 | -2.796 | 10.714-158.031 | 1.00 | 2.00 | CARJ |
| ATOM | 3994 | H4  | BGLC | 11 | -2.034 | 11.483-158.108 | 1.00 | 0.00 | CARJ |

|      |      |     |      |    |        |                |      |      |      |
|------|------|-----|------|----|--------|----------------|------|------|------|
| ATOM | 3995 | O4  | BGLC | 11 | -2.754 | 10.167-159.312 | 1.00 | 2.00 | CARJ |
| ATOM | 3996 | C6  | BGLC | 11 | -0.883 | 9.254-157.250  | 1.00 | 2.00 | CARJ |
| ATOM | 3997 | H61 | BGLC | 11 | -0.438 | 10.179-157.762 | 1.00 | 0.00 | CARJ |
| ATOM | 3998 | H62 | BGLC | 11 | -0.229 | 9.094-156.399  | 1.00 | 0.00 | CARJ |
| ATOM | 3999 | O6  | BGLC | 11 | -0.824 | 8.248-158.241  | 1.00 | 2.00 | CARJ |
| ATOM | 4000 | HO6 | BGLC | 11 | -1.338 | 7.455-158.122  | 1.00 | 0.00 | CARJ |
| ATOM | 4001 | C1  | BGLC | 12 | -2.594 | 10.682-160.451 | 1.00 | 2.00 | CARJ |
| ATOM | 4002 | H1  | BGLC | 12 | -1.792 | 11.411-160.445 | 1.00 | 0.00 | CARJ |
| ATOM | 4003 | C5  | BGLC | 12 | -3.762 | 11.851-162.171 | 1.00 | 2.00 | CARJ |
| ATOM | 4004 | H5  | BGLC | 12 | -3.062 | 12.710-162.218 | 1.00 | 0.00 | CARJ |
| ATOM | 4005 | O5  | BGLC | 12 | -3.790 | 11.290-160.872 | 1.00 | 2.00 | CARJ |
| ATOM | 4006 | C2  | BGLC | 12 | -2.116 | 9.619-161.434  | 1.00 | 2.00 | CARJ |
| ATOM | 4007 | H2  | BGLC | 12 | -2.892 | 8.788-161.431  | 1.00 | 0.00 | CARJ |
| ATOM | 4008 | O2  | BGLC | 12 | -0.894 | 9.041-160.992  | 1.00 | 2.00 | CARJ |
| ATOM | 4009 | HO2 | BGLC | 12 | -0.823 | 8.092-161.046  | 1.00 | 0.00 | CARJ |
| ATOM | 4010 | C3  | BGLC | 12 | -1.970 | 10.222-162.816 | 1.00 | 2.00 | CARJ |
| ATOM | 4011 | H3  | BGLC | 12 | -1.304 | 11.084-162.815 | 1.00 | 0.00 | CARJ |
| ATOM | 4012 | O3  | BGLC | 12 | -1.536 | 9.198-163.692  | 1.00 | 2.00 | CARJ |
| ATOM | 4013 | HO3 | BGLC | 12 | -0.657 | 8.858-163.641  | 1.00 | 0.00 | CARJ |
| ATOM | 4014 | C4  | BGLC | 12 | -3.324 | 10.819-163.221 | 1.00 | 2.00 | CARJ |
| ATOM | 4015 | H4  | BGLC | 12 | -4.089 | 10.053-163.295 | 1.00 | 0.00 | CARJ |
| ATOM | 4016 | O4  | BGLC | 12 | -3.363 | 11.362-164.505 | 1.00 | 2.00 | CARJ |
| ATOM | 4017 | C6  | BGLC | 12 | -5.233 | 12.285-162.444 | 1.00 | 2.00 | CARJ |
| ATOM | 4018 | H61 | BGLC | 12 | -5.678 | 11.358-162.951 | 1.00 | 0.00 | CARJ |
| ATOM | 4019 | H62 | BGLC | 12 | -5.886 | 12.448-161.593 | 1.00 | 0.00 | CARJ |
| ATOM | 4020 | O6  | BGLC | 12 | -5.294 | 13.287-163.439 | 1.00 | 2.00 | CARJ |
| ATOM | 4021 | HO6 | BGLC | 12 | -4.780 | 14.080-163.324 | 1.00 | 0.00 | CARJ |
| ATOM | 4022 | C1  | BGLC | 13 | -3.528 | 10.844-165.641 | 1.00 | 2.00 | CARJ |
| ATOM | 4023 | H1  | BGLC | 13 | -4.331 | 10.116-165.629 | 1.00 | 0.00 | CARJ |
| ATOM | 4024 | C5  | BGLC | 13 | -2.359 | 9.669-167.357  | 1.00 | 2.00 | CARJ |
| ATOM | 4025 | H5  | BGLC | 13 | -3.060 | 8.810-167.400  | 1.00 | 0.00 | CARJ |
| ATOM | 4026 | O5  | BGLC | 13 | -2.330 | 10.234-166.060 | 1.00 | 2.00 | CARJ |
| ATOM | 4027 | C2  | BGLC | 13 | -4.004 | 11.903-166.628 | 1.00 | 2.00 | CARJ |
| ATOM | 4028 | H2  | BGLC | 13 | -3.228 | 12.735-166.629 | 1.00 | 0.00 | CARJ |
| ATOM | 4029 | O2  | BGLC | 13 | -5.227 | 12.482-166.187 | 1.00 | 2.00 | CARJ |
| ATOM | 4030 | HO2 | BGLC | 13 | -5.298 | 13.430-166.243 | 1.00 | 0.00 | CARJ |
| ATOM | 4031 | C3  | BGLC | 13 | -4.151 | 11.295-168.007 | 1.00 | 2.00 | CARJ |
| ATOM | 4032 | H3  | BGLC | 13 | -4.818 | 10.434-167.999 | 1.00 | 0.00 | CARJ |
| ATOM | 4033 | O3  | BGLC | 13 | -4.587 | 12.314-168.887 | 1.00 | 2.00 | CARJ |
| ATOM | 4034 | HO3 | BGLC | 13 | -5.467 | 12.653-168.837 | 1.00 | 0.00 | CARJ |
| ATOM | 4035 | C4  | BGLC | 13 | -2.801 | 10.694-168.411 | 1.00 | 2.00 | CARJ |
| ATOM | 4036 | H4  | BGLC | 13 | -2.039 | 11.464-168.488 | 1.00 | 0.00 | CARJ |
| ATOM | 4037 | O4  | BGLC | 13 | -2.758 | 10.146-169.692 | 1.00 | 2.00 | CARJ |
| ATOM | 4038 | C6  | BGLC | 13 | -0.888 | 9.233-167.630  | 1.00 | 2.00 | CARJ |
| ATOM | 4039 | H61 | BGLC | 13 | -0.443 | 10.158-168.141 | 1.00 | 0.00 | CARJ |
| ATOM | 4040 | H62 | BGLC | 13 | -0.234 | 9.072-166.779  | 1.00 | 0.00 | CARJ |
| ATOM | 4041 | O6  | BGLC | 13 | -0.829 | 8.228-168.621  | 1.00 | 2.00 | CARJ |
| ATOM | 4042 | HO6 | BGLC | 13 | -1.343 | 7.436-168.502  | 1.00 | 0.00 | CARJ |
| ATOM | 4043 | C1  | BGLC | 14 | -2.599 | 10.661-170.831 | 1.00 | 2.00 | CARJ |
| ATOM | 4044 | H1  | BGLC | 14 | -1.797 | 11.390-170.825 | 1.00 | 0.00 | CARJ |
| ATOM | 4045 | C5  | BGLC | 14 | -3.767 | 11.831-172.551 | 1.00 | 2.00 | CARJ |
| ATOM | 4046 | H5  | BGLC | 14 | -3.068 | 12.691-172.597 | 1.00 | 0.00 | CARJ |
| ATOM | 4047 | O5  | BGLC | 14 | -3.794 | 11.269-171.252 | 1.00 | 2.00 | CARJ |
| ATOM | 4048 | C2  | BGLC | 14 | -2.121 | 9.598-171.814  | 1.00 | 2.00 | CARJ |

|      |      |     |      |    |        |                |      |      |      |
|------|------|-----|------|----|--------|----------------|------|------|------|
| ATOM | 4049 | H2  | BGLC | 14 | -2.897 | 8.766-171.811  | 1.00 | 0.00 | CARJ |
| ATOM | 4050 | O2  | BGLC | 14 | -0.898 | 9.021-171.372  | 1.00 | 2.00 | CARJ |
| ATOM | 4051 | HO2 | BGLC | 14 | -0.826 | 8.072-171.425  | 1.00 | 0.00 | CARJ |
| ATOM | 4052 | C3  | BGLC | 14 | -1.974 | 10.201-173.196 | 1.00 | 2.00 | CARJ |
| ATOM | 4053 | H3  | BGLC | 14 | -1.308 | 11.063-173.194 | 1.00 | 0.00 | CARJ |
| ATOM | 4054 | O3  | BGLC | 14 | -1.541 | 9.178-174.072  | 1.00 | 2.00 | CARJ |
| ATOM | 4055 | HO3 | BGLC | 14 | -0.662 | 8.837-174.021  | 1.00 | 0.00 | CARJ |
| ATOM | 4056 | C4  | BGLC | 14 | -3.328 | 10.799-173.601 | 1.00 | 2.00 | CARJ |
| ATOM | 4057 | H4  | BGLC | 14 | -4.092 | 10.032-173.675 | 1.00 | 0.00 | CARJ |
| ATOM | 4058 | O4  | BGLC | 14 | -3.368 | 11.341-174.885 | 1.00 | 2.00 | CARJ |
| ATOM | 4059 | C6  | BGLC | 14 | -5.238 | 12.264-172.824 | 1.00 | 2.00 | CARJ |
| ATOM | 4060 | O61 | BGLC | 14 | -5.331 | 13.656-173.068 | 1.00 | 0.00 | CARJ |
| ATOM | 4061 | O62 | BGLC | 14 | -5.881 | 11.380-172.765 | 1.00 | 0.00 | CARJ |
| ATOM | 4062 | C1  | BGLC | 15 | -3.533 | 10.823-176.021 | 1.00 | 2.00 | CARJ |
| ATOM | 4063 | H1  | BGLC | 15 | -4.335 | 10.095-176.009 | 1.00 | 0.00 | CARJ |
| ATOM | 4064 | C5  | BGLC | 15 | -2.363 | 9.648-177.737  | 1.00 | 2.00 | CARJ |
| ATOM | 4065 | H5  | BGLC | 15 | -3.063 | 8.789-177.780  | 1.00 | 0.00 | CARJ |
| ATOM | 4066 | O5  | BGLC | 15 | -2.333 | 10.213-176.440 | 1.00 | 2.00 | CARJ |
| ATOM | 4067 | C2  | BGLC | 15 | -4.008 | 11.882-177.008 | 1.00 | 2.00 | CARJ |
| ATOM | 4068 | H2  | BGLC | 15 | -3.233 | 12.715-177.009 | 1.00 | 0.00 | CARJ |
| ATOM | 4069 | O2  | BGLC | 15 | -5.231 | 12.459-176.567 | 1.00 | 2.00 | CARJ |
| ATOM | 4070 | HO2 | BGLC | 15 | -5.303 | 13.407-176.622 | 1.00 | 0.00 | CARJ |
| ATOM | 4071 | C3  | BGLC | 15 | -4.156 | 11.274-178.387 | 1.00 | 2.00 | CARJ |
| ATOM | 4072 | H3  | BGLC | 15 | -4.823 | 10.412-178.379 | 1.00 | 0.00 | CARJ |
| ATOM | 4073 | O3  | BGLC | 15 | -4.593 | 12.293-179.267 | 1.00 | 2.00 | CARJ |
| ATOM | 4074 | HO3 | BGLC | 15 | -5.473 | 12.632-179.216 | 1.00 | 0.00 | CARJ |
| ATOM | 4075 | C4  | BGLC | 15 | -2.804 | 10.673-178.791 | 1.00 | 2.00 | CARJ |
| ATOM | 4076 | H4  | BGLC | 15 | -2.041 | 11.442-178.868 | 1.00 | 0.00 | CARJ |
| ATOM | 4077 | O4  | BGLC | 15 | -2.763 | 10.126-180.072 | 1.00 | 2.00 | CARJ |
| ATOM | 4078 | C6  | BGLC | 15 | -0.893 | 9.213-178.010  | 1.00 | 2.00 | CARJ |
| ATOM | 4079 | H61 | BGLC | 15 | -0.449 | 10.138-178.521 | 1.00 | 0.00 | CARJ |
| ATOM | 4080 | H62 | BGLC | 15 | -0.239 | 9.054-177.159  | 1.00 | 0.00 | CARJ |
| ATOM | 4081 | O6  | BGLC | 15 | -0.832 | 8.206-179.001  | 1.00 | 2.00 | CARJ |
| ATOM | 4082 | HO6 | BGLC | 15 | -1.345 | 7.413-178.882  | 1.00 | 0.00 | CARJ |
| ATOM | 4083 | C1  | BGLC | 16 | -2.602 | 10.641-181.211 | 1.00 | 2.00 | CARJ |
| ATOM | 4084 | H1  | BGLC | 16 | -1.800 | 11.370-181.204 | 1.00 | 0.00 | CARJ |
| ATOM | 4085 | C5  | BGLC | 16 | -3.772 | 11.810-182.931 | 1.00 | 2.00 | CARJ |
| ATOM | 4086 | H5  | BGLC | 16 | -3.072 | 12.669-182.978 | 1.00 | 0.00 | CARJ |
| ATOM | 4087 | O5  | BGLC | 16 | -3.799 | 11.249-181.632 | 1.00 | 2.00 | CARJ |
| ATOM | 4088 | C2  | BGLC | 16 | -2.126 | 9.578-182.194  | 1.00 | 2.00 | CARJ |
| ATOM | 4089 | H2  | BGLC | 16 | -2.902 | 8.746-182.192  | 1.00 | 0.00 | CARJ |
| ATOM | 4090 | O2  | BGLC | 16 | -0.902 | 9.001-181.752  | 1.00 | 2.00 | CARJ |
| ATOM | 4091 | HO2 | BGLC | 16 | -0.830 | 8.052-181.805  | 1.00 | 0.00 | CARJ |
| ATOM | 4092 | C3  | BGLC | 16 | -1.978 | 10.181-183.576 | 1.00 | 2.00 | CARJ |
| ATOM | 4093 | H3  | BGLC | 16 | -1.312 | 11.044-183.575 | 1.00 | 0.00 | CARJ |
| ATOM | 4094 | O3  | BGLC | 16 | -1.545 | 9.158-184.452  | 1.00 | 2.00 | CARJ |
| ATOM | 4095 | HO3 | BGLC | 16 | -0.666 | 8.817-184.401  | 1.00 | 0.00 | CARJ |
| ATOM | 4096 | C4  | BGLC | 16 | -3.333 | 10.778-183.981 | 1.00 | 2.00 | CARJ |
| ATOM | 4097 | H4  | BGLC | 16 | -4.097 | 10.010-184.054 | 1.00 | 0.00 | CARJ |
| ATOM | 4098 | O4  | BGLC | 16 | -3.373 | 11.319-185.265 | 1.00 | 2.00 | CARJ |
| ATOM | 4099 | C6  | BGLC | 16 | -5.242 | 12.244-183.204 | 1.00 | 2.00 | CARJ |
| ATOM | 4100 | H61 | BGLC | 16 | -5.687 | 11.317-183.711 | 1.00 | 0.00 | CARJ |
| ATOM | 4101 | H62 | BGLC | 16 | -5.895 | 12.407-182.353 | 1.00 | 0.00 | CARJ |
| ATOM | 4102 | O6  | BGLC | 16 | -5.303 | 13.246-184.199 | 1.00 | 2.00 | CARJ |

|      |      |     |      |    |        |                |      |      |      |
|------|------|-----|------|----|--------|----------------|------|------|------|
| ATOM | 4103 | HO6 | BGLC | 16 | -4.789 | 14.039-184.084 | 1.00 | 0.00 | CARJ |
| ATOM | 4104 | C1  | BGLC | 17 | -3.537 | 10.802-186.401 | 1.00 | 2.00 | CARJ |
| ATOM | 4105 | H1  | BGLC | 17 | -4.339 | 10.073-186.390 | 1.00 | 0.00 | CARJ |
| ATOM | 4106 | C5  | BGLC | 17 | -2.369 | 9.627-188.117  | 1.00 | 2.00 | CARJ |
| ATOM | 4107 | H5  | BGLC | 17 | -3.069 | 8.767-188.159  | 1.00 | 0.00 | CARJ |
| ATOM | 4108 | O5  | BGLC | 17 | -2.338 | 10.193-186.820 | 1.00 | 2.00 | CARJ |
| ATOM | 4109 | C2  | BGLC | 17 | -4.012 | 11.862-187.388 | 1.00 | 2.00 | CARJ |
| ATOM | 4110 | H2  | BGLC | 17 | -3.237 | 12.695-187.390 | 1.00 | 0.00 | CARJ |
| ATOM | 4111 | O2  | BGLC | 17 | -5.235 | 12.439-186.947 | 1.00 | 2.00 | CARJ |
| ATOM | 4112 | HO2 | BGLC | 17 | -5.307 | 13.387-187.002 | 1.00 | 0.00 | CARJ |
| ATOM | 4113 | C3  | BGLC | 17 | -4.161 | 11.254-188.767 | 1.00 | 2.00 | CARJ |
| ATOM | 4114 | H3  | BGLC | 17 | -4.828 | 10.393-188.760 | 1.00 | 0.00 | CARJ |
| ATOM | 4115 | O3  | BGLC | 17 | -4.596 | 12.273-189.647 | 1.00 | 2.00 | CARJ |
| ATOM | 4116 | HO3 | BGLC | 17 | -5.475 | 12.614-189.596 | 1.00 | 0.00 | CARJ |
| ATOM | 4117 | C4  | BGLC | 17 | -2.809 | 10.653-189.171 | 1.00 | 2.00 | CARJ |
| ATOM | 4118 | H4  | BGLC | 17 | -2.046 | 11.421-189.248 | 1.00 | 0.00 | CARJ |
| ATOM | 4119 | O4  | BGLC | 17 | -2.768 | 10.105-190.452 | 1.00 | 2.00 | CARJ |
| ATOM | 4120 | C6  | BGLC | 17 | -0.897 | 9.193-188.390  | 1.00 | 2.00 | CARJ |
| ATOM | 4121 | H61 | BGLC | 17 | -0.453 | 10.118-188.902 | 1.00 | 0.00 | CARJ |
| ATOM | 4122 | H62 | BGLC | 17 | -0.242 | 9.035-187.539  | 1.00 | 0.00 | CARJ |
| ATOM | 4123 | O6  | BGLC | 17 | -0.837 | 8.185-189.381  | 1.00 | 2.00 | CARJ |
| ATOM | 4124 | HO6 | BGLC | 17 | -1.350 | 7.392-189.261  | 1.00 | 0.00 | CARJ |
| ATOM | 4125 | C1  | BGLC | 18 | -2.606 | 10.619-191.591 | 1.00 | 2.00 | CARJ |
| ATOM | 4126 | H1  | BGLC | 18 | -1.804 | 11.348-191.584 | 1.00 | 0.00 | CARJ |
| ATOM | 4127 | C5  | BGLC | 18 | -3.776 | 11.790-193.311 | 1.00 | 2.00 | CARJ |
| ATOM | 4128 | H5  | BGLC | 18 | -3.077 | 12.650-193.356 | 1.00 | 0.00 | CARJ |
| ATOM | 4129 | O5  | BGLC | 18 | -3.804 | 11.227-192.012 | 1.00 | 2.00 | CARJ |
| ATOM | 4130 | C2  | BGLC | 18 | -2.131 | 9.557-192.574  | 1.00 | 2.00 | CARJ |
| ATOM | 4131 | H2  | BGLC | 18 | -2.907 | 8.725-192.572  | 1.00 | 0.00 | CARJ |
| ATOM | 4132 | O2  | BGLC | 18 | -0.907 | 8.980-192.132  | 1.00 | 2.00 | CARJ |
| ATOM | 4133 | HO2 | BGLC | 18 | -0.835 | 8.031-192.185  | 1.00 | 0.00 | CARJ |
| ATOM | 4134 | C3  | BGLC | 18 | -1.983 | 10.160-193.956 | 1.00 | 2.00 | CARJ |
| ATOM | 4135 | H3  | BGLC | 18 | -1.317 | 11.022-193.954 | 1.00 | 0.00 | CARJ |
| ATOM | 4136 | O3  | BGLC | 18 | -1.550 | 9.137-194.832  | 1.00 | 2.00 | CARJ |
| ATOM | 4137 | HO3 | BGLC | 18 | -0.671 | 8.796-194.781  | 1.00 | 0.00 | CARJ |
| ATOM | 4138 | C4  | BGLC | 18 | -3.336 | 10.758-194.361 | 1.00 | 2.00 | CARJ |
| ATOM | 4139 | H4  | BGLC | 18 | -4.100 | 9.990-194.435  | 1.00 | 0.00 | CARJ |
| ATOM | 4140 | O4  | BGLC | 18 | -3.376 | 11.299-195.645 | 1.00 | 2.00 | CARJ |
| ATOM | 4141 | C6  | BGLC | 18 | -5.246 | 12.222-193.584 | 1.00 | 2.00 | CARJ |
| ATOM | 4142 | H61 | BGLC | 18 | -5.690 | 11.294-194.091 | 1.00 | 0.00 | CARJ |
| ATOM | 4143 | H62 | BGLC | 18 | -5.900 | 12.385-192.733 | 1.00 | 0.00 | CARJ |
| ATOM | 4144 | O6  | BGLC | 18 | -5.308 | 13.224-194.579 | 1.00 | 2.00 | CARJ |
| ATOM | 4145 | HO6 | BGLC | 18 | -4.795 | 14.018-194.464 | 1.00 | 0.00 | CARJ |
| ATOM | 4146 | C1  | BGLC | 19 | -3.541 | 10.782-196.781 | 1.00 | 2.00 | CARJ |
| ATOM | 4147 | H1  | BGLC | 19 | -4.344 | 10.054-196.770 | 1.00 | 0.00 | CARJ |
| ATOM | 4148 | C5  | BGLC | 19 | -2.372 | 9.606-198.497  | 1.00 | 2.00 | CARJ |
| ATOM | 4149 | H5  | BGLC | 19 | -3.072 | 8.747-198.540  | 1.00 | 0.00 | CARJ |
| ATOM | 4150 | O5  | BGLC | 19 | -2.343 | 10.172-197.200 | 1.00 | 2.00 | CARJ |
| ATOM | 4151 | C2  | BGLC | 19 | -4.016 | 11.841-197.768 | 1.00 | 2.00 | CARJ |
| ATOM | 4152 | H2  | BGLC | 19 | -3.241 | 12.673-197.771 | 1.00 | 0.00 | CARJ |
| ATOM | 4153 | O2  | BGLC | 19 | -5.240 | 12.419-197.327 | 1.00 | 2.00 | CARJ |
| ATOM | 4154 | HO2 | BGLC | 19 | -5.312 | 13.367-197.382 | 1.00 | 0.00 | CARJ |
| ATOM | 4155 | C3  | BGLC | 19 | -4.166 | 11.232-199.147 | 1.00 | 2.00 | CARJ |
| ATOM | 4156 | H3  | BGLC | 19 | -4.832 | 10.370-199.141 | 1.00 | 0.00 | CARJ |

|      |      |     |      |    |        |                |      |      |      |
|------|------|-----|------|----|--------|----------------|------|------|------|
| ATOM | 4157 | O3  | BGLC | 19 | -4.601 | 12.252-200.027 | 1.00 | 2.00 | CARJ |
| ATOM | 4158 | HO3 | BGLC | 19 | -5.480 | 12.593-199.976 | 1.00 | 0.00 | CARJ |
| ATOM | 4159 | C4  | BGLC | 19 | -2.813 | 10.632-199.551 | 1.00 | 2.00 | CARJ |
| ATOM | 4160 | H4  | BGLC | 19 | -2.050 | 11.400-199.628 | 1.00 | 0.00 | CARJ |
| ATOM | 4161 | O4  | BGLC | 19 | -2.773 | 10.085-200.832 | 1.00 | 2.00 | CARJ |
| ATOM | 4162 | C6  | BGLC | 19 | -0.902 | 9.171-198.770  | 1.00 | 2.00 | CARJ |
| ATOM | 4163 | H61 | BGLC | 19 | -0.458 | 10.096-199.281 | 1.00 | 0.00 | CARJ |
| ATOM | 4164 | H62 | BGLC | 19 | -0.248 | 9.011-197.919  | 1.00 | 0.00 | CARJ |
| ATOM | 4165 | O6  | BGLC | 19 | -0.842 | 8.165-199.761  | 1.00 | 2.00 | CARJ |
| ATOM | 4166 | HO6 | BGLC | 19 | -1.356 | 7.372-199.642  | 1.00 | 0.00 | CARJ |
| ATOM | 4167 | C1  | BGLC | 20 | -2.611 | 10.599-201.971 | 1.00 | 2.00 | CARJ |
| ATOM | 4168 | H1  | BGLC | 20 | -1.809 | 11.328-201.964 | 1.00 | 0.00 | CARJ |
| ATOM | 4169 | C5  | BGLC | 20 | -3.781 | 11.770-203.691 | 1.00 | 2.00 | CARJ |
| ATOM | 4170 | H5  | BGLC | 20 | -3.082 | 12.630-203.737 | 1.00 | 0.00 | CARJ |
| ATOM | 4171 | O5  | BGLC | 20 | -3.808 | 11.207-202.392 | 1.00 | 2.00 | CARJ |
| ATOM | 4172 | C2  | BGLC | 20 | -2.135 | 9.537-202.954  | 1.00 | 2.00 | CARJ |
| ATOM | 4173 | H2  | BGLC | 20 | -2.911 | 8.706-202.951  | 1.00 | 0.00 | CARJ |
| ATOM | 4174 | O2  | BGLC | 20 | -0.911 | 8.959-202.512  | 1.00 | 2.00 | CARJ |
| ATOM | 4175 | HO2 | BGLC | 20 | -0.840 | 8.010-202.565  | 1.00 | 0.00 | CARJ |
| ATOM | 4176 | C3  | BGLC | 20 | -1.988 | 10.139-204.335 | 1.00 | 2.00 | CARJ |
| ATOM | 4177 | H3  | BGLC | 20 | -1.322 | 11.001-204.332 | 1.00 | 0.00 | CARJ |
| ATOM | 4178 | O3  | BGLC | 20 | -1.554 | 9.117-205.212  | 1.00 | 2.00 | CARJ |
| ATOM | 4179 | HO3 | BGLC | 20 | -0.675 | 8.777-205.162  | 1.00 | 0.00 | CARJ |
| ATOM | 4180 | C4  | BGLC | 20 | -3.341 | 10.737-204.741 | 1.00 | 2.00 | CARJ |
| ATOM | 4181 | H4  | BGLC | 20 | -4.168 | 10.059-204.929 | 1.00 | 0.00 | CARJ |
| ATOM | 4182 | O4  | BGLC | 20 | -3.224 | 11.474-205.969 | 1.00 | 2.00 | CARJ |
| ATOM | 4183 | HO4 | BGLC | 20 | -2.727 | 10.930-206.632 | 1.00 | 0.00 | CARJ |
| ATOM | 4184 | C6  | BGLC | 20 | -5.251 | 12.202-203.964 | 1.00 | 2.00 | CARJ |
| ATOM | 4185 | H61 | BGLC | 20 | -5.695 | 11.275-204.472 | 1.00 | 0.00 | CARJ |
| ATOM | 4186 | H62 | BGLC | 20 | -5.905 | 12.364-203.113 | 1.00 | 0.00 | CARJ |
| ATOM | 4187 | O6  | BGLC | 20 | -5.312 | 13.205-204.959 | 1.00 | 2.00 | CARJ |
| ATOM | 4188 | HO6 | BGLC | 20 | -4.799 | 13.998-204.843 | 1.00 | 0.00 | CARJ |
| ATOM | 4189 | C1  | BGLC | 1  | 2.494  | 5.373-103.353  | 1.00 | 2.00 | CARK |
| ATOM | 4190 | H1  | BGLC | 1  | 1.650  | 4.702-103.244  | 1.00 | 0.00 | CARK |
| ATOM | 4191 | O1  | BGLC | 1  | 2.817  | 6.085-102.160  | 1.00 | 2.00 | CARK |
| ATOM | 4192 | HO1 | BGLC | 1  | 3.324  | 6.823-102.421  | 1.00 | 0.00 | CARK |
| ATOM | 4193 | C5  | BGLC | 1  | 3.662  | 4.197-105.069  | 1.00 | 2.00 | CARK |
| ATOM | 4194 | H5  | BGLC | 1  | 2.962  | 3.337-105.110  | 1.00 | 0.00 | CARK |
| ATOM | 4195 | O5  | BGLC | 1  | 3.693  | 4.764-103.772  | 1.00 | 2.00 | CARK |
| ATOM | 4196 | C2  | BGLC | 1  | 2.017  | 6.433-104.340  | 1.00 | 2.00 | CARK |
| ATOM | 4197 | H2  | BGLC | 1  | 2.791  | 7.266-104.342  | 1.00 | 0.00 | CARK |
| ATOM | 4198 | O2  | BGLC | 1  | 0.795  | 7.010-103.898  | 1.00 | 2.00 | CARK |
| ATOM | 4199 | HO2 | BGLC | 1  | 0.723  | 7.958-103.953  | 1.00 | 0.00 | CARK |
| ATOM | 4200 | C3  | BGLC | 1  | 1.870  | 5.824-105.718  | 1.00 | 2.00 | CARK |
| ATOM | 4201 | H3  | BGLC | 1  | 1.203  | 4.963-105.710  | 1.00 | 0.00 | CARK |
| ATOM | 4202 | O3  | BGLC | 1  | 1.435  | 6.843-106.598  | 1.00 | 2.00 | CARK |
| ATOM | 4203 | HO3 | BGLC | 1  | 0.556  | 7.183-106.548  | 1.00 | 0.00 | CARK |
| ATOM | 4204 | C4  | BGLC | 1  | 3.222  | 5.223-106.123  | 1.00 | 2.00 | CARK |
| ATOM | 4205 | H4  | BGLC | 1  | 3.986  | 5.990-106.201  | 1.00 | 0.00 | CARK |
| ATOM | 4206 | O4  | BGLC | 1  | 3.260  | 4.678-107.405  | 1.00 | 2.00 | CARK |
| ATOM | 4207 | C6  | BGLC | 1  | 5.134  | 3.763-105.342  | 1.00 | 2.00 | CARK |
| ATOM | 4208 | H61 | BGLC | 1  | 5.578  | 4.688-105.854  | 1.00 | 0.00 | CARK |
| ATOM | 4209 | H62 | BGLC | 1  | 5.788  | 3.604-104.491  | 1.00 | 0.00 | CARK |
| ATOM | 4210 | O6  | BGLC | 1  | 5.194  | 2.756-106.333  | 1.00 | 2.00 | CARK |

|      |      |     |      |   |       |               |      |      |      |
|------|------|-----|------|---|-------|---------------|------|------|------|
| ATOM | 4211 | HO6 | BGLC | 1 | 4.681 | 1.963-106.213 | 1.00 | 0.00 | CARK |
| ATOM | 4212 | C1  | BGLC | 2 | 3.425 | 5.190-108.543 | 1.00 | 2.00 | CARK |
| ATOM | 4213 | H1  | BGLC | 2 | 4.228 | 5.918-108.535 | 1.00 | 0.00 | CARK |
| ATOM | 4214 | C5  | BGLC | 2 | 2.256 | 6.360-110.263 | 1.00 | 2.00 | CARK |
| ATOM | 4215 | H5  | BGLC | 2 | 2.956 | 7.220-110.308 | 1.00 | 0.00 | CARK |
| ATOM | 4216 | O5  | BGLC | 2 | 2.227 | 5.797-108.963 | 1.00 | 2.00 | CARK |
| ATOM | 4217 | C2  | BGLC | 2 | 3.901 | 4.127-109.526 | 1.00 | 2.00 | CARK |
| ATOM | 4218 | H2  | BGLC | 2 | 3.126 | 3.295-109.524 | 1.00 | 0.00 | CARK |
| ATOM | 4219 | O2  | BGLC | 2 | 5.124 | 3.550-109.083 | 1.00 | 2.00 | CARK |
| ATOM | 4220 | HO2 | BGLC | 2 | 5.195 | 2.601-109.135 | 1.00 | 0.00 | CARK |
| ATOM | 4221 | C3  | BGLC | 2 | 4.048 | 4.731-110.907 | 1.00 | 2.00 | CARK |
| ATOM | 4222 | H3  | BGLC | 2 | 4.714 | 5.593-110.905 | 1.00 | 0.00 | CARK |
| ATOM | 4223 | O3  | BGLC | 2 | 4.482 | 3.708-111.783 | 1.00 | 2.00 | CARK |
| ATOM | 4224 | HO3 | BGLC | 2 | 5.361 | 3.367-111.732 | 1.00 | 0.00 | CARK |
| ATOM | 4225 | C4  | BGLC | 2 | 2.694 | 5.329-111.313 | 1.00 | 2.00 | CARK |
| ATOM | 4226 | H4  | BGLC | 2 | 1.930 | 4.561-111.386 | 1.00 | 0.00 | CARK |
| ATOM | 4227 | O4  | BGLC | 2 | 2.652 | 5.872-112.597 | 1.00 | 2.00 | CARK |
| ATOM | 4228 | C6  | BGLC | 2 | 0.784 | 6.793-110.536 | 1.00 | 2.00 | CARK |
| ATOM | 4229 | H61 | BGLC | 2 | 0.339 | 5.866-111.044 | 1.00 | 0.00 | CARK |
| ATOM | 4230 | H62 | BGLC | 2 | 0.131 | 6.955-109.685 | 1.00 | 0.00 | CARK |
| ATOM | 4231 | O6  | BGLC | 2 | 0.723 | 7.796-111.531 | 1.00 | 2.00 | CARK |
| ATOM | 4232 | HO6 | BGLC | 2 | 1.237 | 8.589-111.415 | 1.00 | 0.00 | CARK |
| ATOM | 4233 | C1  | BGLC | 3 | 2.490 | 5.353-113.733 | 1.00 | 2.00 | CARK |
| ATOM | 4234 | H1  | BGLC | 3 | 1.688 | 4.624-113.722 | 1.00 | 0.00 | CARK |
| ATOM | 4235 | C5  | BGLC | 3 | 3.659 | 4.176-115.449 | 1.00 | 2.00 | CARK |
| ATOM | 4236 | H5  | BGLC | 3 | 2.960 | 3.316-115.491 | 1.00 | 0.00 | CARK |
| ATOM | 4237 | O5  | BGLC | 3 | 3.688 | 4.743-114.152 | 1.00 | 2.00 | CARK |
| ATOM | 4238 | C2  | BGLC | 3 | 2.013 | 6.411-114.720 | 1.00 | 2.00 | CARK |
| ATOM | 4239 | H2  | BGLC | 3 | 2.788 | 7.243-114.722 | 1.00 | 0.00 | CARK |
| ATOM | 4240 | O2  | BGLC | 3 | 0.790 | 6.990-114.278 | 1.00 | 2.00 | CARK |
| ATOM | 4241 | HO2 | BGLC | 3 | 0.718 | 7.938-114.335 | 1.00 | 0.00 | CARK |
| ATOM | 4242 | C3  | BGLC | 3 | 1.866 | 5.802-116.098 | 1.00 | 2.00 | CARK |
| ATOM | 4243 | H3  | BGLC | 3 | 1.200 | 4.940-116.091 | 1.00 | 0.00 | CARK |
| ATOM | 4244 | O3  | BGLC | 3 | 1.430 | 6.823-116.978 | 1.00 | 2.00 | CARK |
| ATOM | 4245 | HO3 | BGLC | 3 | 0.551 | 7.163-116.927 | 1.00 | 0.00 | CARK |
| ATOM | 4246 | C4  | BGLC | 3 | 3.217 | 5.203-116.503 | 1.00 | 2.00 | CARK |
| ATOM | 4247 | H4  | BGLC | 3 | 3.980 | 5.971-116.581 | 1.00 | 0.00 | CARK |
| ATOM | 4248 | O4  | BGLC | 3 | 3.256 | 4.656-117.785 | 1.00 | 2.00 | CARK |
| ATOM | 4249 | C6  | BGLC | 3 | 5.129 | 3.743-115.722 | 1.00 | 2.00 | CARK |
| ATOM | 4250 | H61 | BGLC | 3 | 5.572 | 4.668-116.235 | 1.00 | 0.00 | CARK |
| ATOM | 4251 | H62 | BGLC | 3 | 5.784 | 3.585-114.871 | 1.00 | 0.00 | CARK |
| ATOM | 4252 | O6  | BGLC | 3 | 5.189 | 2.735-116.713 | 1.00 | 2.00 | CARK |
| ATOM | 4253 | HO6 | BGLC | 3 | 4.676 | 1.942-116.593 | 1.00 | 0.00 | CARK |
| ATOM | 4254 | C1  | BGLC | 4 | 3.420 | 5.170-118.923 | 1.00 | 2.00 | CARK |
| ATOM | 4255 | H1  | BGLC | 4 | 4.222 | 5.899-118.914 | 1.00 | 0.00 | CARK |
| ATOM | 4256 | C5  | BGLC | 4 | 2.251 | 6.339-120.643 | 1.00 | 2.00 | CARK |
| ATOM | 4257 | H5  | BGLC | 4 | 2.950 | 7.199-120.689 | 1.00 | 0.00 | CARK |
| ATOM | 4258 | O5  | BGLC | 4 | 2.224 | 5.776-119.343 | 1.00 | 2.00 | CARK |
| ATOM | 4259 | C2  | BGLC | 4 | 3.896 | 4.107-119.906 | 1.00 | 2.00 | CARK |
| ATOM | 4260 | H2  | BGLC | 4 | 3.121 | 3.275-119.905 | 1.00 | 0.00 | CARK |
| ATOM | 4261 | O2  | BGLC | 4 | 5.119 | 3.530-119.463 | 1.00 | 2.00 | CARK |
| ATOM | 4262 | HO2 | BGLC | 4 | 5.190 | 2.581-119.515 | 1.00 | 0.00 | CARK |
| ATOM | 4263 | C3  | BGLC | 4 | 4.044 | 4.711-121.287 | 1.00 | 2.00 | CARK |
| ATOM | 4264 | H3  | BGLC | 4 | 4.710 | 5.573-121.285 | 1.00 | 0.00 | CARK |

|      |      |     |      |   |       |               |      |      |      |
|------|------|-----|------|---|-------|---------------|------|------|------|
| ATOM | 4265 | O3  | BGLC | 4 | 4.478 | 3.688-122.163 | 1.00 | 2.00 | CARK |
| ATOM | 4266 | HO3 | BGLC | 4 | 5.357 | 3.347-122.112 | 1.00 | 0.00 | CARK |
| ATOM | 4267 | C4  | BGLC | 4 | 2.690 | 5.309-121.693 | 1.00 | 2.00 | CARK |
| ATOM | 4268 | H4  | BGLC | 4 | 1.927 | 4.540-121.766 | 1.00 | 0.00 | CARK |
| ATOM | 4269 | O4  | BGLC | 4 | 2.648 | 5.851-122.977 | 1.00 | 2.00 | CARK |
| ATOM | 4270 | C6  | BGLC | 4 | 0.780 | 6.772-120.916 | 1.00 | 2.00 | CARK |
| ATOM | 4271 | H61 | BGLC | 4 | 0.335 | 5.845-121.424 | 1.00 | 0.00 | CARK |
| ATOM | 4272 | H62 | BGLC | 4 | 0.126 | 6.934-120.065 | 1.00 | 0.00 | CARK |
| ATOM | 4273 | O6  | BGLC | 4 | 0.719 | 7.775-121.911 | 1.00 | 2.00 | CARK |
| ATOM | 4274 | HO6 | BGLC | 4 | 1.233 | 8.568-121.795 | 1.00 | 0.00 | CARK |
| ATOM | 4275 | C1  | BGLC | 5 | 2.485 | 5.332-124.113 | 1.00 | 2.00 | CARK |
| ATOM | 4276 | H1  | BGLC | 5 | 1.683 | 4.603-124.102 | 1.00 | 0.00 | CARK |
| ATOM | 4277 | C5  | BGLC | 5 | 3.654 | 4.156-125.829 | 1.00 | 2.00 | CARK |
| ATOM | 4278 | H5  | BGLC | 5 | 2.954 | 3.296-125.872 | 1.00 | 0.00 | CARK |
| ATOM | 4279 | O5  | BGLC | 5 | 3.683 | 4.722-124.532 | 1.00 | 2.00 | CARK |
| ATOM | 4280 | C2  | BGLC | 5 | 2.010 | 6.391-125.100 | 1.00 | 2.00 | CARK |
| ATOM | 4281 | H2  | BGLC | 5 | 2.785 | 7.224-125.103 | 1.00 | 0.00 | CARK |
| ATOM | 4282 | O2  | BGLC | 5 | 0.786 | 6.969-124.658 | 1.00 | 2.00 | CARK |
| ATOM | 4283 | HO2 | BGLC | 5 | 0.714 | 7.917-124.713 | 1.00 | 0.00 | CARK |
| ATOM | 4284 | C3  | BGLC | 5 | 1.861 | 5.781-126.478 | 1.00 | 2.00 | CARK |
| ATOM | 4285 | H3  | BGLC | 5 | 1.195 | 4.919-126.473 | 1.00 | 0.00 | CARK |
| ATOM | 4286 | O3  | BGLC | 5 | 1.426 | 6.803-127.358 | 1.00 | 2.00 | CARK |
| ATOM | 4287 | HO3 | BGLC | 5 | 0.547 | 7.145-127.307 | 1.00 | 0.00 | CARK |
| ATOM | 4288 | C4  | BGLC | 5 | 3.213 | 5.183-126.883 | 1.00 | 2.00 | CARK |
| ATOM | 4289 | H4  | BGLC | 5 | 3.976 | 5.951-126.960 | 1.00 | 0.00 | CARK |
| ATOM | 4290 | O4  | BGLC | 5 | 3.253 | 4.636-128.165 | 1.00 | 2.00 | CARK |
| ATOM | 4291 | C6  | BGLC | 5 | 5.124 | 3.722-126.102 | 1.00 | 2.00 | CARK |
| ATOM | 4292 | H61 | BGLC | 5 | 5.568 | 4.648-126.613 | 1.00 | 0.00 | CARK |
| ATOM | 4293 | H62 | BGLC | 5 | 5.779 | 3.563-125.251 | 1.00 | 0.00 | CARK |
| ATOM | 4294 | O6  | BGLC | 5 | 5.185 | 2.715-127.093 | 1.00 | 2.00 | CARK |
| ATOM | 4295 | HO6 | BGLC | 5 | 4.672 | 1.922-126.974 | 1.00 | 0.00 | CARK |
| ATOM | 4296 | C1  | BGLC | 6 | 3.416 | 5.148-129.303 | 1.00 | 2.00 | CARK |
| ATOM | 4297 | H1  | BGLC | 6 | 4.219 | 5.876-129.296 | 1.00 | 0.00 | CARK |
| ATOM | 4298 | C5  | BGLC | 6 | 2.246 | 6.318-131.023 | 1.00 | 2.00 | CARK |
| ATOM | 4299 | H5  | BGLC | 6 | 2.945 | 7.178-131.070 | 1.00 | 0.00 | CARK |
| ATOM | 4300 | O5  | BGLC | 6 | 2.219 | 5.756-129.723 | 1.00 | 2.00 | CARK |
| ATOM | 4301 | C2  | BGLC | 6 | 3.891 | 4.085-130.286 | 1.00 | 2.00 | CARK |
| ATOM | 4302 | H2  | BGLC | 6 | 3.116 | 3.252-130.286 | 1.00 | 0.00 | CARK |
| ATOM | 4303 | O2  | BGLC | 6 | 5.116 | 3.508-129.843 | 1.00 | 2.00 | CARK |
| ATOM | 4304 | HO2 | BGLC | 6 | 5.188 | 2.559-129.895 | 1.00 | 0.00 | CARK |
| ATOM | 4305 | C3  | BGLC | 6 | 4.040 | 4.690-131.667 | 1.00 | 2.00 | CARK |
| ATOM | 4306 | H3  | BGLC | 6 | 4.706 | 5.552-131.666 | 1.00 | 0.00 | CARK |
| ATOM | 4307 | O3  | BGLC | 6 | 4.473 | 3.666-132.543 | 1.00 | 2.00 | CARK |
| ATOM | 4308 | HO3 | BGLC | 6 | 5.351 | 3.324-132.491 | 1.00 | 0.00 | CARK |
| ATOM | 4309 | C4  | BGLC | 6 | 2.685 | 5.288-132.073 | 1.00 | 2.00 | CARK |
| ATOM | 4310 | H4  | BGLC | 6 | 1.922 | 4.519-132.146 | 1.00 | 0.00 | CARK |
| ATOM | 4311 | O4  | BGLC | 6 | 2.643 | 5.829-133.357 | 1.00 | 2.00 | CARK |
| ATOM | 4312 | C6  | BGLC | 6 | 0.776 | 6.751-131.296 | 1.00 | 2.00 | CARK |
| ATOM | 4313 | H61 | BGLC | 6 | 0.332 | 5.823-131.803 | 1.00 | 0.00 | CARK |
| ATOM | 4314 | H62 | BGLC | 6 | 0.122 | 6.914-130.445 | 1.00 | 0.00 | CARK |
| ATOM | 4315 | O6  | BGLC | 6 | 0.714 | 7.754-132.291 | 1.00 | 2.00 | CARK |
| ATOM | 4316 | HO6 | BGLC | 6 | 1.227 | 8.548-132.175 | 1.00 | 0.00 | CARK |
| ATOM | 4317 | C1  | BGLC | 7 | 2.481 | 5.311-134.493 | 1.00 | 2.00 | CARK |
| ATOM | 4318 | H1  | BGLC | 7 | 1.679 | 4.582-134.483 | 1.00 | 0.00 | CARK |



|      |      |     |      |   |       |               |      |      |      |
|------|------|-----|------|---|-------|---------------|------|------|------|
| ATOM | 4319 | C5  | BGLC | 7 | 3.650 | 4.135-136.209 | 1.00 | 2.00 | CARK |
| ATOM | 4320 | H5  | BGLC | 7 | 2.950 | 3.275-136.252 | 1.00 | 0.00 | CARK |
| ATOM | 4321 | O5  | BGLC | 7 | 3.678 | 4.702-134.912 | 1.00 | 2.00 | CARK |
| ATOM | 4322 | C2  | BGLC | 7 | 2.005 | 6.370-135.480 | 1.00 | 2.00 | CARK |
| ATOM | 4323 | H2  | BGLC | 7 | 2.779 | 7.203-135.482 | 1.00 | 0.00 | CARK |
| ATOM | 4324 | O2  | BGLC | 7 | 0.781 | 6.947-135.038 | 1.00 | 2.00 | CARK |
| ATOM | 4325 | HO2 | BGLC | 7 | 0.708 | 7.895-135.093 | 1.00 | 0.00 | CARK |
| ATOM | 4326 | C3  | BGLC | 7 | 1.857 | 5.762-136.858 | 1.00 | 2.00 | CARK |
| ATOM | 4327 | H3  | BGLC | 7 | 1.190 | 4.900-136.851 | 1.00 | 0.00 | CARK |
| ATOM | 4328 | O3  | BGLC | 7 | 1.423 | 6.781-137.738 | 1.00 | 2.00 | CARK |
| ATOM | 4329 | HO3 | BGLC | 7 | 0.544 | 7.122-137.688 | 1.00 | 0.00 | CARK |
| ATOM | 4330 | C4  | BGLC | 7 | 3.209 | 5.162-137.263 | 1.00 | 2.00 | CARK |
| ATOM | 4331 | H4  | BGLC | 7 | 3.973 | 5.930-137.341 | 1.00 | 0.00 | CARK |
| ATOM | 4332 | O4  | BGLC | 7 | 3.248 | 4.615-138.545 | 1.00 | 2.00 | CARK |
| ATOM | 4333 | C6  | BGLC | 7 | 5.119 | 3.700-136.482 | 1.00 | 2.00 | CARK |
| ATOM | 4334 | H61 | BGLC | 7 | 5.563 | 4.626-136.993 | 1.00 | 0.00 | CARK |
| ATOM | 4335 | H62 | BGLC | 7 | 5.773 | 3.540-135.631 | 1.00 | 0.00 | CARK |
| ATOM | 4336 | O6  | BGLC | 7 | 5.180 | 2.694-137.473 | 1.00 | 2.00 | CARK |
| ATOM | 4337 | HO6 | BGLC | 7 | 4.667 | 1.901-137.354 | 1.00 | 0.00 | CARK |
| ATOM | 4338 | C1  | BGLC | 8 | 3.412 | 5.129-139.683 | 1.00 | 2.00 | CARK |
| ATOM | 4339 | H1  | BGLC | 8 | 4.214 | 5.858-139.674 | 1.00 | 0.00 | CARK |
| ATOM | 4340 | C5  | BGLC | 8 | 2.242 | 6.297-141.403 | 1.00 | 2.00 | CARK |
| ATOM | 4341 | H5  | BGLC | 8 | 2.942 | 7.156-141.450 | 1.00 | 0.00 | CARK |
| ATOM | 4342 | O5  | BGLC | 8 | 2.215 | 5.736-140.103 | 1.00 | 2.00 | CARK |
| ATOM | 4343 | C2  | BGLC | 8 | 3.887 | 4.065-140.666 | 1.00 | 2.00 | CARK |
| ATOM | 4344 | H2  | BGLC | 8 | 3.111 | 3.233-140.665 | 1.00 | 0.00 | CARK |
| ATOM | 4345 | O2  | BGLC | 8 | 5.111 | 3.487-140.223 | 1.00 | 2.00 | CARK |
| ATOM | 4346 | HO2 | BGLC | 8 | 5.182 | 2.538-140.275 | 1.00 | 0.00 | CARK |
| ATOM | 4347 | C3  | BGLC | 8 | 4.035 | 4.669-142.047 | 1.00 | 2.00 | CARK |
| ATOM | 4348 | H3  | BGLC | 8 | 4.702 | 5.531-142.044 | 1.00 | 0.00 | CARK |
| ATOM | 4349 | O3  | BGLC | 8 | 4.469 | 3.646-142.923 | 1.00 | 2.00 | CARK |
| ATOM | 4350 | HO3 | BGLC | 8 | 5.348 | 3.305-142.872 | 1.00 | 0.00 | CARK |
| ATOM | 4351 | C4  | BGLC | 8 | 2.681 | 5.268-142.453 | 1.00 | 2.00 | CARK |
| ATOM | 4352 | H4  | BGLC | 8 | 1.918 | 4.499-142.526 | 1.00 | 0.00 | CARK |
| ATOM | 4353 | O4  | BGLC | 8 | 2.639 | 5.810-143.737 | 1.00 | 2.00 | CARK |
| ATOM | 4354 | C6  | BGLC | 8 | 0.771 | 6.731-141.676 | 1.00 | 2.00 | CARK |
| ATOM | 4355 | H61 | BGLC | 8 | 0.326 | 5.804-142.183 | 1.00 | 0.00 | CARK |
| ATOM | 4356 | H62 | BGLC | 8 | 0.118 | 6.894-140.825 | 1.00 | 0.00 | CARK |
| ATOM | 4357 | O6  | BGLC | 8 | 0.710 | 7.733-142.671 | 1.00 | 2.00 | CARK |
| ATOM | 4358 | HO6 | BGLC | 8 | 1.224 | 8.526-142.556 | 1.00 | 0.00 | CARK |
| ATOM | 4359 | C1  | BGLC | 9 | 2.476 | 5.291-144.873 | 1.00 | 2.00 | CARK |
| ATOM | 4360 | H1  | BGLC | 9 | 1.674 | 4.562-144.862 | 1.00 | 0.00 | CARK |
| ATOM | 4361 | C5  | BGLC | 9 | 3.645 | 4.115-146.589 | 1.00 | 2.00 | CARK |
| ATOM | 4362 | H5  | BGLC | 9 | 2.945 | 3.256-146.632 | 1.00 | 0.00 | CARK |
| ATOM | 4363 | O5  | BGLC | 9 | 3.674 | 4.681-145.292 | 1.00 | 2.00 | CARK |
| ATOM | 4364 | C2  | BGLC | 9 | 2.000 | 6.351-145.859 | 1.00 | 2.00 | CARK |
| ATOM | 4365 | H2  | BGLC | 9 | 2.774 | 7.184-145.862 | 1.00 | 0.00 | CARK |
| ATOM | 4366 | O2  | BGLC | 9 | 0.777 | 6.928-145.418 | 1.00 | 2.00 | CARK |
| ATOM | 4367 | HO2 | BGLC | 9 | 0.705 | 7.876-145.473 | 1.00 | 0.00 | CARK |
| ATOM | 4368 | C3  | BGLC | 9 | 1.852 | 5.741-147.238 | 1.00 | 2.00 | CARK |
| ATOM | 4369 | H3  | BGLC | 9 | 1.186 | 4.879-147.232 | 1.00 | 0.00 | CARK |
| ATOM | 4370 | O3  | BGLC | 9 | 1.418 | 6.761-148.118 | 1.00 | 2.00 | CARK |
| ATOM | 4371 | HO3 | BGLC | 9 | 0.539 | 7.102-148.068 | 1.00 | 0.00 | CARK |
| ATOM | 4372 | C4  | BGLC | 9 | 3.205 | 5.141-147.643 | 1.00 | 2.00 | CARK |

|      |      |     |      |    |       |               |      |      |      |
|------|------|-----|------|----|-------|---------------|------|------|------|
| ATOM | 4373 | H4  | BGLC | 9  | 3.969 | 5.908-147.721 | 1.00 | 0.00 | CARK |
| ATOM | 4374 | O4  | BGLC | 9  | 3.243 | 4.595-148.925 | 1.00 | 2.00 | CARK |
| ATOM | 4375 | C6  | BGLC | 9  | 5.115 | 3.680-146.862 | 1.00 | 2.00 | CARK |
| ATOM | 4376 | H61 | BGLC | 9  | 5.559 | 4.605-147.373 | 1.00 | 0.00 | CARK |
| ATOM | 4377 | H62 | BGLC | 9  | 5.769 | 3.521-146.011 | 1.00 | 0.00 | CARK |
| ATOM | 4378 | O6  | BGLC | 9  | 5.176 | 2.673-147.853 | 1.00 | 2.00 | CARK |
| ATOM | 4379 | HO6 | BGLC | 9  | 4.663 | 1.880-147.734 | 1.00 | 0.00 | CARK |
| ATOM | 4380 | C1  | BGLC | 10 | 3.408 | 5.107-150.063 | 1.00 | 2.00 | CARK |
| ATOM | 4381 | H1  | BGLC | 10 | 4.211 | 5.835-150.055 | 1.00 | 0.00 | CARK |
| ATOM | 4382 | C5  | BGLC | 10 | 2.237 | 6.277-151.782 | 1.00 | 2.00 | CARK |
| ATOM | 4383 | H5  | BGLC | 10 | 2.936 | 7.137-151.828 | 1.00 | 0.00 | CARK |
| ATOM | 4384 | O5  | BGLC | 10 | 2.210 | 5.715-150.483 | 1.00 | 2.00 | CARK |
| ATOM | 4385 | C2  | BGLC | 10 | 3.883 | 4.044-151.046 | 1.00 | 2.00 | CARK |
| ATOM | 4386 | H2  | BGLC | 10 | 3.108 | 3.212-151.045 | 1.00 | 0.00 | CARK |
| ATOM | 4387 | O2  | BGLC | 10 | 5.106 | 3.467-150.603 | 1.00 | 2.00 | CARK |
| ATOM | 4388 | HO2 | BGLC | 10 | 5.177 | 2.518-150.655 | 1.00 | 0.00 | CARK |
| ATOM | 4389 | C3  | BGLC | 10 | 4.031 | 4.649-152.427 | 1.00 | 2.00 | CARK |
| ATOM | 4390 | H3  | BGLC | 10 | 4.697 | 5.512-152.426 | 1.00 | 0.00 | CARK |
| ATOM | 4391 | O3  | BGLC | 10 | 4.465 | 3.625-153.303 | 1.00 | 2.00 | CARK |
| ATOM | 4392 | HO3 | BGLC | 10 | 5.344 | 3.284-153.251 | 1.00 | 0.00 | CARK |
| ATOM | 4393 | C4  | BGLC | 10 | 2.676 | 5.246-152.833 | 1.00 | 2.00 | CARK |
| ATOM | 4394 | H4  | BGLC | 10 | 1.912 | 4.478-152.907 | 1.00 | 0.00 | CARK |
| ATOM | 4395 | O4  | BGLC | 10 | 2.635 | 5.788-154.117 | 1.00 | 2.00 | CARK |
| ATOM | 4396 | C6  | BGLC | 10 | 0.767 | 6.710-152.056 | 1.00 | 2.00 | CARK |
| ATOM | 4397 | H61 | BGLC | 10 | 0.323 | 5.782-152.563 | 1.00 | 0.00 | CARK |
| ATOM | 4398 | H62 | BGLC | 10 | 0.113 | 6.873-151.205 | 1.00 | 0.00 | CARK |
| ATOM | 4399 | O6  | BGLC | 10 | 0.705 | 7.712-153.051 | 1.00 | 2.00 | CARK |
| ATOM | 4400 | HO6 | BGLC | 10 | 1.218 | 8.506-152.936 | 1.00 | 0.00 | CARK |
| ATOM | 4401 | C1  | BGLC | 11 | 2.471 | 5.270-155.253 | 1.00 | 2.00 | CARK |
| ATOM | 4402 | H1  | BGLC | 11 | 1.669 | 4.541-155.242 | 1.00 | 0.00 | CARK |
| ATOM | 4403 | C5  | BGLC | 11 | 3.640 | 4.093-156.969 | 1.00 | 2.00 | CARK |
| ATOM | 4404 | H5  | BGLC | 11 | 2.940 | 3.233-157.009 | 1.00 | 0.00 | CARK |
| ATOM | 4405 | O5  | BGLC | 11 | 3.671 | 4.661-155.672 | 1.00 | 2.00 | CARK |
| ATOM | 4406 | C2  | BGLC | 11 | 1.995 | 6.329-156.239 | 1.00 | 2.00 | CARK |
| ATOM | 4407 | H2  | BGLC | 11 | 2.770 | 7.162-156.240 | 1.00 | 0.00 | CARK |
| ATOM | 4408 | O2  | BGLC | 11 | 0.772 | 6.907-155.798 | 1.00 | 2.00 | CARK |
| ATOM | 4409 | HO2 | BGLC | 11 | 0.700 | 7.855-155.854 | 1.00 | 0.00 | CARK |
| ATOM | 4410 | C3  | BGLC | 11 | 1.848 | 5.720-157.618 | 1.00 | 2.00 | CARK |
| ATOM | 4411 | H3  | BGLC | 11 | 1.181 | 4.858-157.611 | 1.00 | 0.00 | CARK |
| ATOM | 4412 | O3  | BGLC | 11 | 1.413 | 6.740-158.498 | 1.00 | 2.00 | CARK |
| ATOM | 4413 | HO3 | BGLC | 11 | 0.534 | 7.080-158.448 | 1.00 | 0.00 | CARK |
| ATOM | 4414 | C4  | BGLC | 11 | 3.200 | 5.120-158.023 | 1.00 | 2.00 | CARK |
| ATOM | 4415 | H4  | BGLC | 11 | 3.964 | 5.887-158.100 | 1.00 | 0.00 | CARK |
| ATOM | 4416 | O4  | BGLC | 11 | 3.239 | 4.574-159.305 | 1.00 | 2.00 | CARK |
| ATOM | 4417 | C6  | BGLC | 11 | 5.111 | 3.659-157.242 | 1.00 | 2.00 | CARK |
| ATOM | 4418 | H61 | BGLC | 11 | 5.555 | 4.584-157.754 | 1.00 | 0.00 | CARK |
| ATOM | 4419 | H62 | BGLC | 11 | 5.766 | 3.500-156.391 | 1.00 | 0.00 | CARK |
| ATOM | 4420 | O6  | BGLC | 11 | 5.171 | 2.652-158.233 | 1.00 | 2.00 | CARK |
| ATOM | 4421 | HO6 | BGLC | 11 | 4.658 | 1.859-158.113 | 1.00 | 0.00 | CARK |
| ATOM | 4422 | C1  | BGLC | 12 | 3.403 | 5.086-160.443 | 1.00 | 2.00 | CARK |
| ATOM | 4423 | H1  | BGLC | 12 | 4.206 | 5.814-160.436 | 1.00 | 0.00 | CARK |
| ATOM | 4424 | C5  | BGLC | 12 | 2.233 | 6.256-162.162 | 1.00 | 2.00 | CARK |
| ATOM | 4425 | H5  | BGLC | 12 | 2.932 | 7.116-162.208 | 1.00 | 0.00 | CARK |
| ATOM | 4426 | O5  | BGLC | 12 | 2.205 | 5.694-160.863 | 1.00 | 2.00 | CARK |

|      |      |     |      |    |       |               |      |      |      |
|------|------|-----|------|----|-------|---------------|------|------|------|
| ATOM | 4427 | C2  | BGLC | 12 | 3.878 | 4.024-161.426 | 1.00 | 2.00 | CARK |
| ATOM | 4428 | H2  | BGLC | 12 | 3.102 | 3.192-161.425 | 1.00 | 0.00 | CARK |
| ATOM | 4429 | O2  | BGLC | 12 | 5.102 | 3.446-160.983 | 1.00 | 2.00 | CARK |
| ATOM | 4430 | HO2 | BGLC | 12 | 5.173 | 2.497-161.036 | 1.00 | 0.00 | CARK |
| ATOM | 4431 | C3  | BGLC | 12 | 4.026 | 4.628-162.807 | 1.00 | 2.00 | CARK |
| ATOM | 4432 | H3  | BGLC | 12 | 4.692 | 5.490-162.806 | 1.00 | 0.00 | CARK |
| ATOM | 4433 | O3  | BGLC | 12 | 4.460 | 3.604-163.683 | 1.00 | 2.00 | CARK |
| ATOM | 4434 | HO3 | BGLC | 12 | 5.339 | 3.263-163.631 | 1.00 | 0.00 | CARK |
| ATOM | 4435 | C4  | BGLC | 12 | 2.671 | 5.226-163.213 | 1.00 | 2.00 | CARK |
| ATOM | 4436 | H4  | BGLC | 12 | 1.907 | 4.458-163.287 | 1.00 | 0.00 | CARK |
| ATOM | 4437 | O4  | BGLC | 12 | 2.630 | 5.768-164.497 | 1.00 | 2.00 | CARK |
| ATOM | 4438 | C6  | BGLC | 12 | 0.762 | 6.689-162.436 | 1.00 | 2.00 | CARK |
| ATOM | 4439 | H61 | BGLC | 12 | 0.318 | 5.762-162.944 | 1.00 | 0.00 | CARK |
| ATOM | 4440 | H62 | BGLC | 12 | 0.108 | 6.851-161.585 | 1.00 | 0.00 | CARK |
| ATOM | 4441 | O6  | BGLC | 12 | 0.701 | 7.692-163.431 | 1.00 | 2.00 | CARK |
| ATOM | 4442 | HO6 | BGLC | 12 | 1.214 | 8.485-163.315 | 1.00 | 0.00 | CARK |
| ATOM | 4443 | C1  | BGLC | 13 | 2.468 | 5.250-165.633 | 1.00 | 2.00 | CARK |
| ATOM | 4444 | H1  | BGLC | 13 | 1.665 | 4.522-165.623 | 1.00 | 0.00 | CARK |
| ATOM | 4445 | C5  | BGLC | 13 | 3.637 | 4.072-167.349 | 1.00 | 2.00 | CARK |
| ATOM | 4446 | H5  | BGLC | 13 | 2.938 | 3.212-167.391 | 1.00 | 0.00 | CARK |
| ATOM | 4447 | O5  | BGLC | 13 | 3.665 | 4.639-166.052 | 1.00 | 2.00 | CARK |
| ATOM | 4448 | C2  | BGLC | 13 | 1.991 | 6.308-166.619 | 1.00 | 2.00 | CARK |
| ATOM | 4449 | H2  | BGLC | 13 | 2.767 | 7.140-166.621 | 1.00 | 0.00 | CARK |
| ATOM | 4450 | O2  | BGLC | 13 | 0.767 | 6.887-166.178 | 1.00 | 2.00 | CARK |
| ATOM | 4451 | HO2 | BGLC | 13 | 0.695 | 7.835-166.234 | 1.00 | 0.00 | CARK |
| ATOM | 4452 | C3  | BGLC | 13 | 1.843 | 5.699-167.998 | 1.00 | 2.00 | CARK |
| ATOM | 4453 | H3  | BGLC | 13 | 1.177 | 4.837-167.992 | 1.00 | 0.00 | CARK |
| ATOM | 4454 | O3  | BGLC | 13 | 1.408 | 6.720-168.878 | 1.00 | 2.00 | CARK |
| ATOM | 4455 | HO3 | BGLC | 13 | 0.529 | 7.061-168.827 | 1.00 | 0.00 | CARK |
| ATOM | 4456 | C4  | BGLC | 13 | 3.195 | 5.100-168.403 | 1.00 | 2.00 | CARK |
| ATOM | 4457 | H4  | BGLC | 13 | 3.958 | 5.868-168.481 | 1.00 | 0.00 | CARK |
| ATOM | 4458 | O4  | BGLC | 13 | 3.234 | 4.552-169.685 | 1.00 | 2.00 | CARK |
| ATOM | 4459 | C6  | BGLC | 13 | 5.107 | 3.639-167.621 | 1.00 | 2.00 | CARK |
| ATOM | 4460 | H61 | BGLC | 13 | 5.551 | 4.564-168.133 | 1.00 | 0.00 | CARK |
| ATOM | 4461 | H62 | BGLC | 13 | 5.761 | 3.481-166.770 | 1.00 | 0.00 | CARK |
| ATOM | 4462 | O6  | BGLC | 13 | 5.166 | 2.632-168.612 | 1.00 | 2.00 | CARK |
| ATOM | 4463 | HO6 | BGLC | 13 | 4.652 | 1.839-168.492 | 1.00 | 0.00 | CARK |
| ATOM | 4464 | C1  | BGLC | 14 | 3.398 | 5.066-170.823 | 1.00 | 2.00 | CARK |
| ATOM | 4465 | H1  | BGLC | 14 | 4.200 | 5.795-170.814 | 1.00 | 0.00 | CARK |
| ATOM | 4466 | C5  | BGLC | 14 | 2.229 | 6.235-172.542 | 1.00 | 2.00 | CARK |
| ATOM | 4467 | H5  | BGLC | 14 | 2.929 | 7.095-172.588 | 1.00 | 0.00 | CARK |
| ATOM | 4468 | O5  | BGLC | 14 | 2.201 | 5.673-171.243 | 1.00 | 2.00 | CARK |
| ATOM | 4469 | C2  | BGLC | 14 | 3.874 | 4.003-171.806 | 1.00 | 2.00 | CARK |
| ATOM | 4470 | H2  | BGLC | 14 | 3.099 | 3.170-171.805 | 1.00 | 0.00 | CARK |
| ATOM | 4471 | O2  | BGLC | 14 | 5.098 | 3.426-171.363 | 1.00 | 2.00 | CARK |
| ATOM | 4472 | HO2 | BGLC | 14 | 5.170 | 2.477-171.415 | 1.00 | 0.00 | CARK |
| ATOM | 4473 | C3  | BGLC | 14 | 4.021 | 4.608-173.187 | 1.00 | 2.00 | CARK |
| ATOM | 4474 | H3  | BGLC | 14 | 4.687 | 5.470-173.185 | 1.00 | 0.00 | CARK |
| ATOM | 4475 | O3  | BGLC | 14 | 4.456 | 3.584-174.063 | 1.00 | 2.00 | CARK |
| ATOM | 4476 | HO3 | BGLC | 14 | 5.335 | 3.244-174.011 | 1.00 | 0.00 | CARK |
| ATOM | 4477 | C4  | BGLC | 14 | 2.668 | 5.205-173.593 | 1.00 | 2.00 | CARK |
| ATOM | 4478 | H4  | BGLC | 14 | 1.905 | 4.437-173.666 | 1.00 | 0.00 | CARK |
| ATOM | 4479 | O4  | BGLC | 14 | 2.626 | 5.747-174.877 | 1.00 | 2.00 | CARK |
| ATOM | 4480 | C6  | BGLC | 14 | 0.757 | 6.669-172.816 | 1.00 | 2.00 | CARK |

|      |      |     |      |    |       |               |      |      |      |
|------|------|-----|------|----|-------|---------------|------|------|------|
| ATOM | 4481 | H61 | BGLC | 14 | 0.312 | 5.741-173.323 | 1.00 | 0.00 | CARK |
| ATOM | 4482 | H62 | BGLC | 14 | 0.103 | 6.832-171.965 | 1.00 | 0.00 | CARK |
| ATOM | 4483 | O6  | BGLC | 14 | 0.696 | 7.671-173.811 | 1.00 | 2.00 | CARK |
| ATOM | 4484 | HO6 | BGLC | 14 | 1.210 | 8.464-173.696 | 1.00 | 0.00 | CARK |
| ATOM | 4485 | C1  | BGLC | 15 | 2.464 | 5.228-176.013 | 1.00 | 2.00 | CARK |
| ATOM | 4486 | H1  | BGLC | 15 | 1.662 | 4.499-176.002 | 1.00 | 0.00 | CARK |
| ATOM | 4487 | C5  | BGLC | 15 | 3.632 | 4.052-177.729 | 1.00 | 2.00 | CARK |
| ATOM | 4488 | H5  | BGLC | 15 | 2.932 | 3.192-177.772 | 1.00 | 0.00 | CARK |
| ATOM | 4489 | O5  | BGLC | 15 | 3.661 | 4.618-176.432 | 1.00 | 2.00 | CARK |
| ATOM | 4490 | C2  | BGLC | 15 | 1.987 | 6.288-176.999 | 1.00 | 2.00 | CARK |
| ATOM | 4491 | H2  | BGLC | 15 | 2.762 | 7.121-177.002 | 1.00 | 0.00 | CARK |
| ATOM | 4492 | O2  | BGLC | 15 | 0.764 | 6.865-176.558 | 1.00 | 2.00 | CARK |
| ATOM | 4493 | HO2 | BGLC | 15 | 0.692 | 7.813-176.613 | 1.00 | 0.00 | CARK |
| ATOM | 4494 | C3  | BGLC | 15 | 1.838 | 5.678-178.378 | 1.00 | 2.00 | CARK |
| ATOM | 4495 | H3  | BGLC | 15 | 1.172 | 4.816-178.372 | 1.00 | 0.00 | CARK |
| ATOM | 4496 | O3  | BGLC | 15 | 1.404 | 6.698-179.258 | 1.00 | 2.00 | CARK |
| ATOM | 4497 | HO3 | BGLC | 15 | 0.525 | 7.040-179.207 | 1.00 | 0.00 | CARK |
| ATOM | 4498 | C4  | BGLC | 15 | 3.190 | 5.079-178.783 | 1.00 | 2.00 | CARK |
| ATOM | 4499 | H4  | BGLC | 15 | 3.953 | 5.848-178.860 | 1.00 | 0.00 | CARK |
| ATOM | 4500 | O4  | BGLC | 15 | 3.230 | 4.533-180.064 | 1.00 | 2.00 | CARK |
| ATOM | 4501 | C6  | BGLC | 15 | 5.102 | 3.618-178.001 | 1.00 | 2.00 | CARK |
| ATOM | 4502 | H61 | BGLC | 15 | 5.546 | 4.543-178.512 | 1.00 | 0.00 | CARK |
| ATOM | 4503 | H62 | BGLC | 15 | 5.756 | 3.459-177.150 | 1.00 | 0.00 | CARK |
| ATOM | 4504 | O6  | BGLC | 15 | 5.163 | 2.611-178.992 | 1.00 | 2.00 | CARK |
| ATOM | 4505 | HO6 | BGLC | 15 | 4.650 | 1.818-178.873 | 1.00 | 0.00 | CARK |
| ATOM | 4506 | C1  | BGLC | 16 | 3.393 | 5.045-181.203 | 1.00 | 2.00 | CARK |
| ATOM | 4507 | H1  | BGLC | 16 | 4.196 | 5.773-181.196 | 1.00 | 0.00 | CARK |
| ATOM | 4508 | C5  | BGLC | 16 | 2.224 | 6.215-182.922 | 1.00 | 2.00 | CARK |
| ATOM | 4509 | H5  | BGLC | 16 | 2.923 | 7.075-182.968 | 1.00 | 0.00 | CARK |
| ATOM | 4510 | O5  | BGLC | 16 | 2.197 | 5.652-181.623 | 1.00 | 2.00 | CARK |
| ATOM | 4511 | C2  | BGLC | 16 | 3.869 | 3.982-182.186 | 1.00 | 2.00 | CARK |
| ATOM | 4512 | H2  | BGLC | 16 | 3.094 | 3.150-182.185 | 1.00 | 0.00 | CARK |
| ATOM | 4513 | O2  | BGLC | 16 | 5.094 | 3.405-181.743 | 1.00 | 2.00 | CARK |
| ATOM | 4514 | HO2 | BGLC | 16 | 5.166 | 2.456-181.795 | 1.00 | 0.00 | CARK |
| ATOM | 4515 | C3  | BGLC | 16 | 4.018 | 4.586-183.567 | 1.00 | 2.00 | CARK |
| ATOM | 4516 | H3  | BGLC | 16 | 4.685 | 5.448-183.566 | 1.00 | 0.00 | CARK |
| ATOM | 4517 | O3  | BGLC | 16 | 4.451 | 3.562-184.443 | 1.00 | 2.00 | CARK |
| ATOM | 4518 | HO3 | BGLC | 16 | 5.329 | 3.220-184.391 | 1.00 | 0.00 | CARK |
| ATOM | 4519 | C4  | BGLC | 16 | 2.663 | 5.185-183.973 | 1.00 | 2.00 | CARK |
| ATOM | 4520 | H4  | BGLC | 16 | 1.900 | 4.417-184.046 | 1.00 | 0.00 | CARK |
| ATOM | 4521 | O4  | BGLC | 16 | 2.621 | 5.727-185.257 | 1.00 | 2.00 | CARK |
| ATOM | 4522 | C6  | BGLC | 16 | 0.754 | 6.648-183.196 | 1.00 | 2.00 | CARK |
| ATOM | 4523 | H61 | BGLC | 16 | 0.310 | 5.720-183.704 | 1.00 | 0.00 | CARK |
| ATOM | 4524 | H62 | BGLC | 16 | 0.100 | 6.810-182.345 | 1.00 | 0.00 | CARK |
| ATOM | 4525 | O6  | BGLC | 16 | 0.692 | 7.652-184.191 | 1.00 | 2.00 | CARK |
| ATOM | 4526 | HO6 | BGLC | 16 | 1.205 | 8.446-184.075 | 1.00 | 0.00 | CARK |
| ATOM | 4527 | C1  | BGLC | 17 | 2.459 | 5.208-186.393 | 1.00 | 2.00 | CARK |
| ATOM | 4528 | H1  | BGLC | 17 | 1.657 | 4.479-186.382 | 1.00 | 0.00 | CARK |
| ATOM | 4529 | C5  | BGLC | 17 | 3.627 | 4.031-188.109 | 1.00 | 2.00 | CARK |
| ATOM | 4530 | H5  | BGLC | 17 | 2.928 | 3.171-188.151 | 1.00 | 0.00 | CARK |
| ATOM | 4531 | O5  | BGLC | 17 | 3.656 | 4.598-186.812 | 1.00 | 2.00 | CARK |
| ATOM | 4532 | C2  | BGLC | 17 | 1.982 | 6.267-187.379 | 1.00 | 2.00 | CARK |
| ATOM | 4533 | H2  | BGLC | 17 | 2.756 | 7.100-187.382 | 1.00 | 0.00 | CARK |
| ATOM | 4534 | O2  | BGLC | 17 | 0.759 | 6.844-186.938 | 1.00 | 2.00 | CARK |

|      |      |     |      |    |       |               |      |      |      |
|------|------|-----|------|----|-------|---------------|------|------|------|
| ATOM | 4535 | HO2 | BGLC | 17 | 0.687 | 7.792-186.993 | 1.00 | 0.00 | CARK |
| ATOM | 4536 | C3  | BGLC | 17 | 1.834 | 5.657-188.758 | 1.00 | 2.00 | CARK |
| ATOM | 4537 | H3  | BGLC | 17 | 1.168 | 4.795-188.753 | 1.00 | 0.00 | CARK |
| ATOM | 4538 | O3  | BGLC | 17 | 1.400 | 6.678-189.638 | 1.00 | 2.00 | CARK |
| ATOM | 4539 | HO3 | BGLC | 17 | 0.521 | 7.020-189.588 | 1.00 | 0.00 | CARK |
| ATOM | 4540 | C4  | BGLC | 17 | 3.187 | 5.058-189.163 | 1.00 | 2.00 | CARK |
| ATOM | 4541 | H4  | BGLC | 17 | 3.951 | 5.825-189.241 | 1.00 | 0.00 | CARK |
| ATOM | 4542 | O4  | BGLC | 17 | 3.226 | 4.511-190.444 | 1.00 | 2.00 | CARK |
| ATOM | 4543 | C6  | BGLC | 17 | 5.097 | 3.598-188.381 | 1.00 | 2.00 | CARK |
| ATOM | 4544 | H61 | BGLC | 17 | 5.541 | 4.523-188.893 | 1.00 | 0.00 | CARK |
| ATOM | 4545 | H62 | BGLC | 17 | 5.751 | 3.440-187.530 | 1.00 | 0.00 | CARK |
| ATOM | 4546 | O6  | BGLC | 17 | 5.158 | 2.590-189.372 | 1.00 | 2.00 | CARK |
| ATOM | 4547 | HO6 | BGLC | 17 | 4.645 | 1.797-189.252 | 1.00 | 0.00 | CARK |
| ATOM | 4548 | C1  | BGLC | 18 | 3.389 | 5.025-191.583 | 1.00 | 2.00 | CARK |
| ATOM | 4549 | H1  | BGLC | 18 | 4.191 | 5.754-191.575 | 1.00 | 0.00 | CARK |
| ATOM | 4550 | C5  | BGLC | 18 | 2.220 | 6.194-193.302 | 1.00 | 2.00 | CARK |
| ATOM | 4551 | H5  | BGLC | 18 | 2.919 | 7.054-193.348 | 1.00 | 0.00 | CARK |
| ATOM | 4552 | O5  | BGLC | 18 | 2.193 | 5.632-192.003 | 1.00 | 2.00 | CARK |
| ATOM | 4553 | C2  | BGLC | 18 | 3.865 | 3.961-192.566 | 1.00 | 2.00 | CARK |
| ATOM | 4554 | H2  | BGLC | 18 | 3.090 | 3.128-192.565 | 1.00 | 0.00 | CARK |
| ATOM | 4555 | O2  | BGLC | 18 | 5.089 | 3.384-192.123 | 1.00 | 2.00 | CARK |
| ATOM | 4556 | HO2 | BGLC | 18 | 5.160 | 2.435-192.175 | 1.00 | 0.00 | CARK |
| ATOM | 4557 | C3  | BGLC | 18 | 4.013 | 4.566-193.947 | 1.00 | 2.00 | CARK |
| ATOM | 4558 | H3  | BGLC | 18 | 4.679 | 5.428-193.945 | 1.00 | 0.00 | CARK |
| ATOM | 4559 | O3  | BGLC | 18 | 4.447 | 3.542-194.823 | 1.00 | 2.00 | CARK |
| ATOM | 4560 | HO3 | BGLC | 18 | 5.326 | 3.201-194.771 | 1.00 | 0.00 | CARK |
| ATOM | 4561 | C4  | BGLC | 18 | 2.659 | 5.164-194.353 | 1.00 | 2.00 | CARK |
| ATOM | 4562 | H4  | BGLC | 18 | 1.896 | 4.395-194.426 | 1.00 | 0.00 | CARK |
| ATOM | 4563 | O4  | BGLC | 18 | 2.616 | 5.705-195.637 | 1.00 | 2.00 | CARK |
| ATOM | 4564 | C6  | BGLC | 18 | 0.749 | 6.628-193.576 | 1.00 | 2.00 | CARK |
| ATOM | 4565 | H61 | BGLC | 18 | 0.305 | 5.700-194.083 | 1.00 | 0.00 | CARK |
| ATOM | 4566 | H62 | BGLC | 18 | 0.095 | 6.791-192.725 | 1.00 | 0.00 | CARK |
| ATOM | 4567 | O6  | BGLC | 18 | 0.687 | 7.630-194.571 | 1.00 | 2.00 | CARK |
| ATOM | 4568 | HO6 | BGLC | 18 | 1.200 | 8.424-194.456 | 1.00 | 0.00 | CARK |
| ATOM | 4569 | C1  | BGLC | 19 | 2.454 | 5.187-196.772 | 1.00 | 2.00 | CARK |
| ATOM | 4570 | H1  | BGLC | 19 | 1.653 | 4.458-196.761 | 1.00 | 0.00 | CARK |
| ATOM | 4571 | C5  | BGLC | 19 | 3.623 | 4.011-198.489 | 1.00 | 2.00 | CARK |
| ATOM | 4572 | H5  | BGLC | 19 | 2.923 | 3.152-198.532 | 1.00 | 0.00 | CARK |
| ATOM | 4573 | O5  | BGLC | 19 | 3.651 | 4.578-197.192 | 1.00 | 2.00 | CARK |
| ATOM | 4574 | C2  | BGLC | 19 | 1.978 | 6.246-197.759 | 1.00 | 2.00 | CARK |
| ATOM | 4575 | H2  | BGLC | 19 | 2.753 | 7.079-197.761 | 1.00 | 0.00 | CARK |
| ATOM | 4576 | O2  | BGLC | 19 | 0.754 | 6.824-197.318 | 1.00 | 2.00 | CARK |
| ATOM | 4577 | HO2 | BGLC | 19 | 0.682 | 7.772-197.374 | 1.00 | 0.00 | CARK |
| ATOM | 4578 | C3  | BGLC | 19 | 1.830 | 5.637-199.138 | 1.00 | 2.00 | CARK |
| ATOM | 4579 | H3  | BGLC | 19 | 1.164 | 4.775-199.132 | 1.00 | 0.00 | CARK |
| ATOM | 4580 | O3  | BGLC | 19 | 1.395 | 6.657-200.018 | 1.00 | 2.00 | CARK |
| ATOM | 4581 | HO3 | BGLC | 19 | 0.516 | 6.998-199.968 | 1.00 | 0.00 | CARK |
| ATOM | 4582 | C4  | BGLC | 19 | 3.183 | 5.038-199.543 | 1.00 | 2.00 | CARK |
| ATOM | 4583 | H4  | BGLC | 19 | 3.947 | 5.805-199.621 | 1.00 | 0.00 | CARK |
| ATOM | 4584 | O4  | BGLC | 19 | 3.222 | 4.490-200.824 | 1.00 | 2.00 | CARK |
| ATOM | 4585 | C6  | BGLC | 19 | 5.093 | 3.576-198.761 | 1.00 | 2.00 | CARK |
| ATOM | 4586 | H61 | BGLC | 19 | 5.538 | 4.501-199.272 | 1.00 | 0.00 | CARK |
| ATOM | 4587 | H62 | BGLC | 19 | 5.747 | 3.416-197.910 | 1.00 | 0.00 | CARK |
| ATOM | 4588 | O6  | BGLC | 19 | 5.153 | 2.570-199.752 | 1.00 | 2.00 | CARK |

|      |      |     |      |    |        |                |      |      |      |
|------|------|-----|------|----|--------|----------------|------|------|------|
| ATOM | 4589 | HO6 | BGLC | 19 | 4.639  | 1.777-199.633  | 1.00 | 0.00 | CARK |
| ATOM | 4590 | C1  | BGLC | 20 | 3.385  | 5.003-201.963  | 1.00 | 2.00 | CARK |
| ATOM | 4591 | H1  | BGLC | 20 | 4.188  | 5.731-201.956  | 1.00 | 0.00 | CARK |
| ATOM | 4592 | C5  | BGLC | 20 | 2.215  | 6.173-203.682  | 1.00 | 2.00 | CARK |
| ATOM | 4593 | H5  | BGLC | 20 | 2.914  | 7.033-203.729  | 1.00 | 0.00 | CARK |
| ATOM | 4594 | O5  | BGLC | 20 | 2.188  | 5.612-202.383  | 1.00 | 2.00 | CARK |
| ATOM | 4595 | C2  | BGLC | 20 | 3.861  | 3.940-202.946  | 1.00 | 2.00 | CARK |
| ATOM | 4596 | H2  | BGLC | 20 | 3.086  | 3.107-202.945  | 1.00 | 0.00 | CARK |
| ATOM | 4597 | O2  | BGLC | 20 | 5.084  | 3.363-202.503  | 1.00 | 2.00 | CARK |
| ATOM | 4598 | HO2 | BGLC | 20 | 5.155  | 2.414-202.555  | 1.00 | 0.00 | CARK |
| ATOM | 4599 | C3  | BGLC | 20 | 4.008  | 4.545-204.327  | 1.00 | 2.00 | CARK |
| ATOM | 4600 | H3  | BGLC | 20 | 4.674  | 5.407-204.326  | 1.00 | 0.00 | CARK |
| ATOM | 4601 | O3  | BGLC | 20 | 4.442  | 3.521-205.203  | 1.00 | 2.00 | CARK |
| ATOM | 4602 | HO3 | BGLC | 20 | 5.321  | 3.180-205.152  | 1.00 | 0.00 | CARK |
| ATOM | 4603 | C4  | BGLC | 20 | 2.654  | 5.142-204.732  | 1.00 | 2.00 | CARK |
| ATOM | 4604 | H4  | BGLC | 20 | 1.827  | 4.465-204.921  | 1.00 | 0.00 | CARK |
| ATOM | 4605 | O4  | BGLC | 20 | 2.772  | 5.877-205.960  | 1.00 | 2.00 | CARK |
| ATOM | 4606 | HO4 | BGLC | 20 | 3.269  | 5.332-206.622  | 1.00 | 0.00 | CARK |
| ATOM | 4607 | C6  | BGLC | 20 | 0.745  | 6.606-203.956  | 1.00 | 2.00 | CARK |
| ATOM | 4608 | H61 | BGLC | 20 | 0.302  | 5.678-204.463  | 1.00 | 0.00 | CARK |
| ATOM | 4609 | H62 | BGLC | 20 | 0.091  | 6.769-203.105  | 1.00 | 0.00 | CARK |
| ATOM | 4610 | O6  | BGLC | 20 | 0.682  | 7.609-204.951  | 1.00 | 2.00 | CARK |
| ATOM | 4611 | HO6 | BGLC | 20 | 1.195  | 8.403-204.835  | 1.00 | 0.00 | CARK |
| ATOM | 4612 | C1  | BGLC | 1  | 8.492  | -0.221-103.344 | 1.00 | 2.00 | CARL |
| ATOM | 4613 | H1  | BGLC | 1  | 7.649  | -0.893-103.236 | 1.00 | 0.00 | CARL |
| ATOM | 4614 | O1  | BGLC | 1  | 8.813  | 0.490-102.152  | 1.00 | 2.00 | CARL |
| ATOM | 4615 | HO1 | BGLC | 1  | 9.321  | 1.228-102.413  | 1.00 | 0.00 | CARL |
| ATOM | 4616 | C5  | BGLC | 1  | 9.660  | -1.398-105.060 | 1.00 | 2.00 | CARL |
| ATOM | 4617 | H5  | BGLC | 1  | 8.961  | -2.258-105.102 | 1.00 | 0.00 | CARL |
| ATOM | 4618 | O5  | BGLC | 1  | 9.690  | -0.832-103.763 | 1.00 | 2.00 | CARL |
| ATOM | 4619 | C2  | BGLC | 1  | 8.015  | 0.838-104.331  | 1.00 | 2.00 | CARL |
| ATOM | 4620 | H2  | BGLC | 1  | 8.790  | 1.671-104.332  | 1.00 | 0.00 | CARL |
| ATOM | 4621 | O2  | BGLC | 1  | 6.792  | 1.415-103.890  | 1.00 | 2.00 | CARL |
| ATOM | 4622 | HO2 | BGLC | 1  | 6.720  | 2.363-103.946  | 1.00 | 0.00 | CARL |
| ATOM | 4623 | C3  | BGLC | 1  | 7.867  | 0.230-105.710  | 1.00 | 2.00 | CARL |
| ATOM | 4624 | H3  | BGLC | 1  | 7.200  | -0.631-105.703 | 1.00 | 0.00 | CARL |
| ATOM | 4625 | O3  | BGLC | 1  | 7.432  | 1.249-106.590  | 1.00 | 2.00 | CARL |
| ATOM | 4626 | HO3 | BGLC | 1  | 6.553  | 1.589-106.540  | 1.00 | 0.00 | CARL |
| ATOM | 4627 | C4  | BGLC | 1  | 9.219  | -0.371-106.114 | 1.00 | 2.00 | CARL |
| ATOM | 4628 | H4  | BGLC | 1  | 9.983  | 0.397-106.192  | 1.00 | 0.00 | CARL |
| ATOM | 4629 | O4  | BGLC | 1  | 9.258  | -0.917-107.396 | 1.00 | 2.00 | CARL |
| ATOM | 4630 | C6  | BGLC | 1  | 11.131 | -1.831-105.333 | 1.00 | 2.00 | CARL |
| ATOM | 4631 | H61 | BGLC | 1  | 11.574 | -0.906-105.845 | 1.00 | 0.00 | CARL |
| ATOM | 4632 | H62 | BGLC | 1  | 11.786 | -1.989-104.482 | 1.00 | 0.00 | CARL |
| ATOM | 4633 | O6  | BGLC | 1  | 11.191 | -2.838-106.324 | 1.00 | 2.00 | CARL |
| ATOM | 4634 | HO6 | BGLC | 1  | 10.678 | -3.631-106.204 | 1.00 | 0.00 | CARL |
| ATOM | 4635 | C1  | BGLC | 2  | 9.422  | -0.405-108.534 | 1.00 | 2.00 | CARL |
| ATOM | 4636 | H1  | BGLC | 2  | 10.225 | 0.323-108.527  | 1.00 | 0.00 | CARL |
| ATOM | 4637 | C5  | BGLC | 2  | 8.253  | 0.764-110.254  | 1.00 | 2.00 | CARL |
| ATOM | 4638 | H5  | BGLC | 2  | 8.954  | 1.623-110.300  | 1.00 | 0.00 | CARL |
| ATOM | 4639 | O5  | BGLC | 2  | 8.224  | 0.203-108.955  | 1.00 | 2.00 | CARL |
| ATOM | 4640 | C2  | BGLC | 2  | 9.898  | -1.468-109.517 | 1.00 | 2.00 | CARL |
| ATOM | 4641 | H2  | BGLC | 2  | 9.122  | -2.300-109.515 | 1.00 | 0.00 | CARL |
| ATOM | 4642 | O2  | BGLC | 2  | 11.121 | -2.044-109.075 | 1.00 | 2.00 | CARL |

|      |      |     |      |   |        |                |      |      |      |
|------|------|-----|------|---|--------|----------------|------|------|------|
| ATOM | 4643 | HO2 | BGLC | 2 | 11.193 | -2.993-109.127 | 1.00 | 0.00 | CARL |
| ATOM | 4644 | C3  | BGLC | 2 | 10.046 | -0.865-110.899 | 1.00 | 2.00 | CARL |
| ATOM | 4645 | H3  | BGLC | 2 | 10.712 | -0.003-110.898 | 1.00 | 0.00 | CARL |
| ATOM | 4646 | O3  | BGLC | 2 | 10.479 | -1.888-111.775 | 1.00 | 2.00 | CARL |
| ATOM | 4647 | HO3 | BGLC | 2 | 11.358 | -2.229-111.724 | 1.00 | 0.00 | CARL |
| ATOM | 4648 | C4  | BGLC | 2 | 8.691  | -0.267-111.304 | 1.00 | 2.00 | CARL |
| ATOM | 4649 | H4  | BGLC | 2 | 7.927  | -1.035-111.377 | 1.00 | 0.00 | CARL |
| ATOM | 4650 | O4  | BGLC | 2 | 8.650  | 0.275-112.588  | 1.00 | 2.00 | CARL |
| ATOM | 4651 | C6  | BGLC | 2 | 6.781  | 1.199-110.527  | 1.00 | 2.00 | CARL |
| ATOM | 4652 | H61 | BGLC | 2 | 6.335  | 0.272-111.033  | 1.00 | 0.00 | CARL |
| ATOM | 4653 | H62 | BGLC | 2 | 6.128  | 1.363-109.676  | 1.00 | 0.00 | CARL |
| ATOM | 4654 | O6  | BGLC | 2 | 6.721  | 2.200-111.522  | 1.00 | 2.00 | CARL |
| ATOM | 4655 | HO6 | BGLC | 2 | 7.236  | 2.993-111.407  | 1.00 | 0.00 | CARL |
| ATOM | 4656 | C1  | BGLC | 3 | 8.487  | -0.243-113.724 | 1.00 | 2.00 | CARL |
| ATOM | 4657 | H1  | BGLC | 3 | 7.685  | -0.972-113.713 | 1.00 | 0.00 | CARL |
| ATOM | 4658 | C5  | BGLC | 3 | 9.656  | -1.418-115.440 | 1.00 | 2.00 | CARL |
| ATOM | 4659 | H5  | BGLC | 3 | 8.956  | -2.277-115.483 | 1.00 | 0.00 | CARL |
| ATOM | 4660 | O5  | BGLC | 3 | 9.685  | -0.852-114.143 | 1.00 | 2.00 | CARL |
| ATOM | 4661 | C2  | BGLC | 3 | 8.010  | 0.817-114.711  | 1.00 | 2.00 | CARL |
| ATOM | 4662 | H2  | BGLC | 3 | 8.785  | 1.650-114.712  | 1.00 | 0.00 | CARL |
| ATOM | 4663 | O2  | BGLC | 3 | 6.787  | 1.394-114.270  | 1.00 | 2.00 | CARL |
| ATOM | 4664 | HO2 | BGLC | 3 | 6.715  | 2.342-114.325  | 1.00 | 0.00 | CARL |
| ATOM | 4665 | C3  | BGLC | 3 | 7.862  | 0.209-116.090  | 1.00 | 2.00 | CARL |
| ATOM | 4666 | H3  | BGLC | 3 | 7.195  | -0.653-116.083 | 1.00 | 0.00 | CARL |
| ATOM | 4667 | O3  | BGLC | 3 | 7.428  | 1.228-116.970  | 1.00 | 2.00 | CARL |
| ATOM | 4668 | HO3 | BGLC | 3 | 6.549  | 1.569-116.920  | 1.00 | 0.00 | CARL |
| ATOM | 4669 | C4  | BGLC | 3 | 9.215  | -0.392-116.494 | 1.00 | 2.00 | CARL |
| ATOM | 4670 | H4  | BGLC | 3 | 9.978  | 0.376-116.572  | 1.00 | 0.00 | CARL |
| ATOM | 4671 | O4  | BGLC | 3 | 9.254  | -0.938-117.776 | 1.00 | 2.00 | CARL |
| ATOM | 4672 | C6  | BGLC | 3 | 11.126 | -1.853-115.713 | 1.00 | 2.00 | CARL |
| ATOM | 4673 | H61 | BGLC | 3 | 11.570 | -0.928-116.224 | 1.00 | 0.00 | CARL |
| ATOM | 4674 | H62 | BGLC | 3 | 11.780 | -2.013-114.862 | 1.00 | 0.00 | CARL |
| ATOM | 4675 | O6  | BGLC | 3 | 11.186 | -2.859-116.704 | 1.00 | 2.00 | CARL |
| ATOM | 4676 | HO6 | BGLC | 3 | 10.672 | -3.652-116.585 | 1.00 | 0.00 | CARL |
| ATOM | 4677 | C1  | BGLC | 4 | 9.417  | -0.426-118.914 | 1.00 | 2.00 | CARL |
| ATOM | 4678 | H1  | BGLC | 4 | 10.220 | 0.302-118.907  | 1.00 | 0.00 | CARL |
| ATOM | 4679 | C5  | BGLC | 4 | 8.249  | 0.744-120.634  | 1.00 | 2.00 | CARL |
| ATOM | 4680 | H5  | BGLC | 4 | 8.949  | 1.603-120.680  | 1.00 | 0.00 | CARL |
| ATOM | 4681 | O5  | BGLC | 4 | 8.221  | 0.182-119.335  | 1.00 | 2.00 | CARL |
| ATOM | 4682 | C2  | BGLC | 4 | 9.894  | -1.489-119.897 | 1.00 | 2.00 | CARL |
| ATOM | 4683 | H2  | BGLC | 4 | 9.119  | -2.321-119.895 | 1.00 | 0.00 | CARL |
| ATOM | 4684 | O2  | BGLC | 4 | 11.116 | -2.065-119.455 | 1.00 | 2.00 | CARL |
| ATOM | 4685 | HO2 | BGLC | 4 | 11.188 | -3.014-119.508 | 1.00 | 0.00 | CARL |
| ATOM | 4686 | C3  | BGLC | 4 | 10.041 | -0.885-121.278 | 1.00 | 2.00 | CARL |
| ATOM | 4687 | H3  | BGLC | 4 | 10.707 | -0.023-121.276 | 1.00 | 0.00 | CARL |
| ATOM | 4688 | O3  | BGLC | 4 | 10.475 | -1.909-122.155 | 1.00 | 2.00 | CARL |
| ATOM | 4689 | HO3 | BGLC | 4 | 11.354 | -2.250-122.104 | 1.00 | 0.00 | CARL |
| ATOM | 4690 | C4  | BGLC | 4 | 8.688  | -0.287-121.684 | 1.00 | 2.00 | CARL |
| ATOM | 4691 | H4  | BGLC | 4 | 7.925  | -1.056-121.756 | 1.00 | 0.00 | CARL |
| ATOM | 4692 | O4  | BGLC | 4 | 8.645  | 0.255-122.968  | 1.00 | 2.00 | CARL |
| ATOM | 4693 | C6  | BGLC | 4 | 6.777  | 1.178-120.907  | 1.00 | 2.00 | CARL |
| ATOM | 4694 | H61 | BGLC | 4 | 6.332  | 0.251-121.414  | 1.00 | 0.00 | CARL |
| ATOM | 4695 | H62 | BGLC | 4 | 6.124  | 1.341-120.056  | 1.00 | 0.00 | CARL |
| ATOM | 4696 | O6  | BGLC | 4 | 6.717  | 2.180-121.902  | 1.00 | 2.00 | CARL |

|      |      |     |      |   |        |                |      |      |      |
|------|------|-----|------|---|--------|----------------|------|------|------|
| ATOM | 4697 | HO6 | BGLC | 4 | 7.231  | 2.973-121.786  | 1.00 | 0.00 | CARL |
| ATOM | 4698 | C1  | BGLC | 5 | 8.483  | -0.264-124.104 | 1.00 | 2.00 | CARL |
| ATOM | 4699 | H1  | BGLC | 5 | 7.681  | -0.993-124.093 | 1.00 | 0.00 | CARL |
| ATOM | 4700 | C5  | BGLC | 5 | 9.651  | -1.439-125.820 | 1.00 | 2.00 | CARL |
| ATOM | 4701 | H5  | BGLC | 5 | 8.951  | -2.298-125.863 | 1.00 | 0.00 | CARL |
| ATOM | 4702 | O5  | BGLC | 5 | 9.680  | -0.873-124.523 | 1.00 | 2.00 | CARL |
| ATOM | 4703 | C2  | BGLC | 5 | 8.007  | 0.795-125.091  | 1.00 | 2.00 | CARL |
| ATOM | 4704 | H2  | BGLC | 5 | 8.783  | 1.627-125.093  | 1.00 | 0.00 | CARL |
| ATOM | 4705 | O2  | BGLC | 5 | 6.783  | 1.374-124.650  | 1.00 | 2.00 | CARL |
| ATOM | 4706 | HO2 | BGLC | 5 | 6.711  | 2.322-124.706  | 1.00 | 0.00 | CARL |
| ATOM | 4707 | C3  | BGLC | 5 | 7.858  | 0.187-126.470  | 1.00 | 2.00 | CARL |
| ATOM | 4708 | H3  | BGLC | 5 | 7.192  | -0.675-126.463 | 1.00 | 0.00 | CARL |
| ATOM | 4709 | O3  | BGLC | 5 | 7.423  | 1.206-127.350  | 1.00 | 2.00 | CARL |
| ATOM | 4710 | HO3 | BGLC | 5 | 6.544  | 1.547-127.299  | 1.00 | 0.00 | CARL |
| ATOM | 4711 | C4  | BGLC | 5 | 9.210  | -0.412-126.874 | 1.00 | 2.00 | CARL |
| ATOM | 4712 | H4  | BGLC | 5 | 9.974  | 0.356-126.952  | 1.00 | 0.00 | CARL |
| ATOM | 4713 | O4  | BGLC | 5 | 9.249  | -0.959-128.156 | 1.00 | 2.00 | CARL |
| ATOM | 4714 | C6  | BGLC | 5 | 11.121 | -1.874-126.093 | 1.00 | 2.00 | CARL |
| ATOM | 4715 | O61 | BGLC | 5 | 11.213 | -3.267-126.330 | 1.00 | 0.00 | CARL |
| ATOM | 4716 | O62 | BGLC | 5 | 11.764 | -0.990-126.040 | 1.00 | 0.00 | CARL |
| ATOM | 4717 | C1  | BGLC | 6 | 9.414  | -0.446-129.294 | 1.00 | 2.00 | CARL |
| ATOM | 4718 | H1  | BGLC | 6 | 10.217 | 0.282-129.285  | 1.00 | 0.00 | CARL |
| ATOM | 4719 | C5  | BGLC | 6 | 8.244  | 0.723-131.014  | 1.00 | 2.00 | CARL |
| ATOM | 4720 | H5  | BGLC | 6 | 8.945  | 1.582-131.061  | 1.00 | 0.00 | CARL |
| ATOM | 4721 | O5  | BGLC | 6 | 8.216  | 0.162-129.715  | 1.00 | 2.00 | CARL |
| ATOM | 4722 | C2  | BGLC | 6 | 9.890  | -1.509-130.277 | 1.00 | 2.00 | CARL |
| ATOM | 4723 | H2  | BGLC | 6 | 9.115  | -2.341-130.274 | 1.00 | 0.00 | CARL |
| ATOM | 4724 | O2  | BGLC | 6 | 11.112 | -2.085-129.835 | 1.00 | 2.00 | CARL |
| ATOM | 4725 | HO2 | BGLC | 6 | 11.184 | -3.034-129.887 | 1.00 | 0.00 | CARL |
| ATOM | 4726 | C3  | BGLC | 6 | 10.036 | -0.906-131.658 | 1.00 | 2.00 | CARL |
| ATOM | 4727 | H3  | BGLC | 6 | 10.702 | -0.044-131.656 | 1.00 | 0.00 | CARL |
| ATOM | 4728 | O3  | BGLC | 6 | 10.470 | -1.930-132.535 | 1.00 | 2.00 | CARL |
| ATOM | 4729 | HO3 | BGLC | 6 | 11.349 | -2.270-132.484 | 1.00 | 0.00 | CARL |
| ATOM | 4730 | C4  | BGLC | 6 | 8.683  | -0.308-132.064 | 1.00 | 2.00 | CARL |
| ATOM | 4731 | H4  | BGLC | 6 | 7.919  | -1.076-132.137 | 1.00 | 0.00 | CARL |
| ATOM | 4732 | O4  | BGLC | 6 | 8.642  | 0.234-133.348  | 1.00 | 2.00 | CARL |
| ATOM | 4733 | C6  | BGLC | 6 | 6.773  | 1.158-131.287  | 1.00 | 2.00 | CARL |
| ATOM | 4734 | H61 | BGLC | 6 | 6.327  | 0.231-131.794  | 1.00 | 0.00 | CARL |
| ATOM | 4735 | H62 | BGLC | 6 | 6.120  | 1.322-130.436  | 1.00 | 0.00 | CARL |
| ATOM | 4736 | O6  | BGLC | 6 | 6.712  | 2.160-132.282  | 1.00 | 2.00 | CARL |
| ATOM | 4737 | HO6 | BGLC | 6 | 7.226  | 2.953-132.167  | 1.00 | 0.00 | CARL |
| ATOM | 4738 | C1  | BGLC | 7 | 8.479  | -0.284-134.484 | 1.00 | 2.00 | CARL |
| ATOM | 4739 | H1  | BGLC | 7 | 7.678  | -1.013-134.473 | 1.00 | 0.00 | CARL |
| ATOM | 4740 | C5  | BGLC | 7 | 9.647  | -1.460-136.200 | 1.00 | 2.00 | CARL |
| ATOM | 4741 | H5  | BGLC | 7 | 8.948  | -2.320-136.241 | 1.00 | 0.00 | CARL |
| ATOM | 4742 | O5  | BGLC | 7 | 9.676  | -0.892-134.903 | 1.00 | 2.00 | CARL |
| ATOM | 4743 | C2  | BGLC | 7 | 8.002  | 0.776-135.471  | 1.00 | 2.00 | CARL |
| ATOM | 4744 | H2  | BGLC | 7 | 8.777  | 1.609-135.474  | 1.00 | 0.00 | CARL |
| ATOM | 4745 | O2  | BGLC | 7 | 6.778  | 1.353-135.030  | 1.00 | 2.00 | CARL |
| ATOM | 4746 | HO2 | BGLC | 7 | 6.705  | 2.301-135.085  | 1.00 | 0.00 | CARL |
| ATOM | 4747 | C3  | BGLC | 7 | 7.853  | 0.167-136.850  | 1.00 | 2.00 | CARL |
| ATOM | 4748 | H3  | BGLC | 7 | 7.187  | -0.695-136.843 | 1.00 | 0.00 | CARL |
| ATOM | 4749 | O3  | BGLC | 7 | 7.418  | 1.186-137.730  | 1.00 | 2.00 | CARL |
| ATOM | 4750 | HO3 | BGLC | 7 | 6.539  | 1.527-137.679  | 1.00 | 0.00 | CARL |



|      |      |     |      |    |        |                |      |      |      |
|------|------|-----|------|----|--------|----------------|------|------|------|
| ATOM | 4751 | C4  | BGLC | 7  | 9.207  | -0.433-137.254 | 1.00 | 2.00 | CARL |
| ATOM | 4752 | H4  | BGLC | 7  | 9.972  | 0.334-137.332  | 1.00 | 0.00 | CARL |
| ATOM | 4753 | O4  | BGLC | 7  | 9.245  | -0.981-138.536 | 1.00 | 2.00 | CARL |
| ATOM | 4754 | C6  | BGLC | 7  | 11.116 | -1.894-136.473 | 1.00 | 2.00 | CARL |
| ATOM | 4755 | H61 | BGLC | 7  | 11.560 | -0.968-136.984 | 1.00 | 0.00 | CARL |
| ATOM | 4756 | H62 | BGLC | 7  | 11.771 | -2.054-135.622 | 1.00 | 0.00 | CARL |
| ATOM | 4757 | O6  | BGLC | 7  | 11.177 | -2.900-137.464 | 1.00 | 2.00 | CARL |
| ATOM | 4758 | HO6 | BGLC | 7  | 10.664 | -3.693-137.345 | 1.00 | 0.00 | CARL |
| ATOM | 4759 | C1  | BGLC | 8  | 9.409  | -0.468-139.674 | 1.00 | 2.00 | CARL |
| ATOM | 4760 | H1  | BGLC | 8  | 10.212 | 0.260-139.666  | 1.00 | 0.00 | CARL |
| ATOM | 4761 | C5  | BGLC | 8  | 8.239  | 0.703-141.394  | 1.00 | 2.00 | CARL |
| ATOM | 4762 | H5  | BGLC | 8  | 8.939  | 1.562-141.440  | 1.00 | 0.00 | CARL |
| ATOM | 4763 | O5  | BGLC | 8  | 8.211  | 0.141-140.095  | 1.00 | 2.00 | CARL |
| ATOM | 4764 | C2  | BGLC | 8  | 9.885  | -1.529-140.657 | 1.00 | 2.00 | CARL |
| ATOM | 4765 | H2  | BGLC | 8  | 9.109  | -2.361-140.655 | 1.00 | 0.00 | CARL |
| ATOM | 4766 | O2  | BGLC | 8  | 11.108 | -2.106-140.215 | 1.00 | 2.00 | CARL |
| ATOM | 4767 | HO2 | BGLC | 8  | 11.180 | -3.054-140.268 | 1.00 | 0.00 | CARL |
| ATOM | 4768 | C3  | BGLC | 8  | 10.032 | -0.926-142.038 | 1.00 | 2.00 | CARL |
| ATOM | 4769 | H3  | BGLC | 8  | 10.698 | -0.064-142.037 | 1.00 | 0.00 | CARL |
| ATOM | 4770 | O3  | BGLC | 8  | 10.465 | -1.950-142.915 | 1.00 | 2.00 | CARL |
| ATOM | 4771 | HO3 | BGLC | 8  | 11.344 | -2.291-142.864 | 1.00 | 0.00 | CARL |
| ATOM | 4772 | C4  | BGLC | 8  | 8.678  | -0.329-142.444 | 1.00 | 2.00 | CARL |
| ATOM | 4773 | H4  | BGLC | 8  | 7.914  | -1.097-142.517 | 1.00 | 0.00 | CARL |
| ATOM | 4774 | O4  | BGLC | 8  | 8.636  | 0.213-143.728  | 1.00 | 2.00 | CARL |
| ATOM | 4775 | C6  | BGLC | 8  | 6.768  | 1.137-141.667  | 1.00 | 2.00 | CARL |
| ATOM | 4776 | H61 | BGLC | 8  | 6.323  | 0.210-142.174  | 1.00 | 0.00 | CARL |
| ATOM | 4777 | H62 | BGLC | 8  | 6.115  | 1.300-140.816  | 1.00 | 0.00 | CARL |
| ATOM | 4778 | O6  | BGLC | 8  | 6.707  | 2.139-142.662  | 1.00 | 2.00 | CARL |
| ATOM | 4779 | HO6 | BGLC | 8  | 7.221  | 2.932-142.547  | 1.00 | 0.00 | CARL |
| ATOM | 4780 | C1  | BGLC | 9  | 8.474  | -0.304-144.864 | 1.00 | 2.00 | CARL |
| ATOM | 4781 | H1  | BGLC | 9  | 7.672  | -1.032-144.855 | 1.00 | 0.00 | CARL |
| ATOM | 4782 | C5  | BGLC | 9  | 9.642  | -1.481-146.580 | 1.00 | 2.00 | CARL |
| ATOM | 4783 | H5  | BGLC | 9  | 8.943  | -2.341-146.622 | 1.00 | 0.00 | CARL |
| ATOM | 4784 | O5  | BGLC | 9  | 9.671  | -0.914-145.283 | 1.00 | 2.00 | CARL |
| ATOM | 4785 | C2  | BGLC | 9  | 7.997  | 0.755-145.851  | 1.00 | 2.00 | CARL |
| ATOM | 4786 | H2  | BGLC | 9  | 8.773  | 1.587-145.853  | 1.00 | 0.00 | CARL |
| ATOM | 4787 | O2  | BGLC | 9  | 6.775  | 1.333-145.410  | 1.00 | 2.00 | CARL |
| ATOM | 4788 | HO2 | BGLC | 9  | 6.703  | 2.281-145.466  | 1.00 | 0.00 | CARL |
| ATOM | 4789 | C3  | BGLC | 9  | 7.848  | 0.146-147.230  | 1.00 | 2.00 | CARL |
| ATOM | 4790 | H3  | BGLC | 9  | 7.182  | -0.716-147.224 | 1.00 | 0.00 | CARL |
| ATOM | 4791 | O3  | BGLC | 9  | 7.414  | 1.165-148.109  | 1.00 | 2.00 | CARL |
| ATOM | 4792 | HO3 | BGLC | 9  | 6.535  | 1.506-148.058  | 1.00 | 0.00 | CARL |
| ATOM | 4793 | C4  | BGLC | 9  | 9.202  | -0.454-147.634 | 1.00 | 2.00 | CARL |
| ATOM | 4794 | H4  | BGLC | 9  | 9.966  | 0.313-147.712  | 1.00 | 0.00 | CARL |
| ATOM | 4795 | O4  | BGLC | 9  | 9.240  | -1.001-148.916 | 1.00 | 2.00 | CARL |
| ATOM | 4796 | C6  | BGLC | 9  | 11.113 | -1.915-146.853 | 1.00 | 2.00 | CARL |
| ATOM | 4797 | O61 | BGLC | 9  | 11.206 | -3.308-147.091 | 1.00 | 0.00 | CARL |
| ATOM | 4798 | O62 | BGLC | 9  | 11.756 | -1.031-146.799 | 1.00 | 0.00 | CARL |
| ATOM | 4799 | C1  | BGLC | 10 | 9.404  | -0.489-150.054 | 1.00 | 2.00 | CARL |
| ATOM | 4800 | H1  | BGLC | 10 | 10.207 | 0.238-150.047  | 1.00 | 0.00 | CARL |
| ATOM | 4801 | C5  | BGLC | 10 | 8.234  | 0.682-151.774  | 1.00 | 2.00 | CARL |
| ATOM | 4802 | H5  | BGLC | 10 | 8.933  | 1.542-151.820  | 1.00 | 0.00 | CARL |
| ATOM | 4803 | O5  | BGLC | 10 | 8.207  | 0.120-150.475  | 1.00 | 2.00 | CARL |
| ATOM | 4804 | C2  | BGLC | 10 | 9.881  | -1.550-151.037 | 1.00 | 2.00 | CARL |

|      |      |     |      |    |        |                |      |      |      |
|------|------|-----|------|----|--------|----------------|------|------|------|
| ATOM | 4805 | H2  | BGLC | 10 | 9.106  | -2.382-151.035 | 1.00 | 0.00 | CARL |
| ATOM | 4806 | O2  | BGLC | 10 | 11.103 | -2.127-150.594 | 1.00 | 2.00 | CARL |
| ATOM | 4807 | HO2 | BGLC | 10 | 11.175 | -3.075-150.648 | 1.00 | 0.00 | CARL |
| ATOM | 4808 | C3  | BGLC | 10 | 10.027 | -0.946-152.418 | 1.00 | 2.00 | CARL |
| ATOM | 4809 | H3  | BGLC | 10 | 10.693 | -0.084-152.416 | 1.00 | 0.00 | CARL |
| ATOM | 4810 | O3  | BGLC | 10 | 10.462 | -1.971-153.295 | 1.00 | 2.00 | CARL |
| ATOM | 4811 | HO3 | BGLC | 10 | 11.341 | -2.311-153.244 | 1.00 | 0.00 | CARL |
| ATOM | 4812 | C4  | BGLC | 10 | 8.673  | -0.349-152.824 | 1.00 | 2.00 | CARL |
| ATOM | 4813 | H4  | BGLC | 10 | 7.909  | -1.117-152.897 | 1.00 | 0.00 | CARL |
| ATOM | 4814 | O4  | BGLC | 10 | 8.632  | 0.192-154.108  | 1.00 | 2.00 | CARL |
| ATOM | 4815 | C6  | BGLC | 10 | 6.763  | 1.115-152.047  | 1.00 | 2.00 | CARL |
| ATOM | 4816 | H61 | BGLC | 10 | 6.318  | 0.188-152.555  | 1.00 | 0.00 | CARL |
| ATOM | 4817 | H62 | BGLC | 10 | 6.109  | 1.277-151.196  | 1.00 | 0.00 | CARL |
| ATOM | 4818 | O6  | BGLC | 10 | 6.703  | 2.118-153.042  | 1.00 | 2.00 | CARL |
| ATOM | 4819 | HO6 | BGLC | 10 | 7.217  | 2.911-152.926  | 1.00 | 0.00 | CARL |
| ATOM | 4820 | C1  | BGLC | 11 | 8.469  | -0.325-155.244 | 1.00 | 2.00 | CARL |
| ATOM | 4821 | H1  | BGLC | 11 | 7.667  | -1.053-155.234 | 1.00 | 0.00 | CARL |
| ATOM | 4822 | C5  | BGLC | 11 | 9.638  | -1.502-156.960 | 1.00 | 2.00 | CARL |
| ATOM | 4823 | H5  | BGLC | 11 | 8.938  | -2.362-157.001 | 1.00 | 0.00 | CARL |
| ATOM | 4824 | O5  | BGLC | 11 | 9.668  | -0.935-155.663 | 1.00 | 2.00 | CARL |
| ATOM | 4825 | C2  | BGLC | 11 | 7.993  | 0.734-156.231  | 1.00 | 2.00 | CARL |
| ATOM | 4826 | H2  | BGLC | 11 | 8.768  | 1.567-156.232  | 1.00 | 0.00 | CARL |
| ATOM | 4827 | O2  | BGLC | 11 | 6.770  | 1.311-155.790  | 1.00 | 2.00 | CARL |
| ATOM | 4828 | HO2 | BGLC | 11 | 6.698  | 2.259-155.845  | 1.00 | 0.00 | CARL |
| ATOM | 4829 | C3  | BGLC | 11 | 7.845  | 0.126-157.610  | 1.00 | 2.00 | CARL |
| ATOM | 4830 | H3  | BGLC | 11 | 7.178  | -0.736-157.603 | 1.00 | 0.00 | CARL |
| ATOM | 4831 | O3  | BGLC | 11 | 7.410  | 1.145-158.489  | 1.00 | 2.00 | CARL |
| ATOM | 4832 | HO3 | BGLC | 11 | 6.531  | 1.485-158.439  | 1.00 | 0.00 | CARL |
| ATOM | 4833 | C4  | BGLC | 11 | 9.197  | -0.474-158.014 | 1.00 | 2.00 | CARL |
| ATOM | 4834 | H4  | BGLC | 11 | 9.961  | 0.294-158.091  | 1.00 | 0.00 | CARL |
| ATOM | 4835 | O4  | BGLC | 11 | 9.236  | -1.021-159.296 | 1.00 | 2.00 | CARL |
| ATOM | 4836 | C6  | BGLC | 11 | 11.109 | -1.936-157.233 | 1.00 | 2.00 | CARL |
| ATOM | 4837 | H61 | BGLC | 11 | 11.553 | -1.011-157.745 | 1.00 | 0.00 | CARL |
| ATOM | 4838 | H62 | BGLC | 11 | 11.763 | -2.095-156.382 | 1.00 | 0.00 | CARL |
| ATOM | 4839 | O6  | BGLC | 11 | 11.168 | -2.942-158.224 | 1.00 | 2.00 | CARL |
| ATOM | 4840 | HO6 | BGLC | 11 | 10.654 | -3.735-158.105 | 1.00 | 0.00 | CARL |
| ATOM | 4841 | C1  | BGLC | 12 | 9.400  | -0.508-160.434 | 1.00 | 2.00 | CARL |
| ATOM | 4842 | H1  | BGLC | 12 | 10.202 | 0.220-160.426  | 1.00 | 0.00 | CARL |
| ATOM | 4843 | C5  | BGLC | 12 | 8.231  | 0.660-162.154  | 1.00 | 2.00 | CARL |
| ATOM | 4844 | H5  | BGLC | 12 | 8.932  | 1.518-162.201  | 1.00 | 0.00 | CARL |
| ATOM | 4845 | O5  | BGLC | 12 | 8.202  | 0.100-160.855  | 1.00 | 2.00 | CARL |
| ATOM | 4846 | C2  | BGLC | 12 | 9.876  | -1.572-161.417 | 1.00 | 2.00 | CARL |
| ATOM | 4847 | H2  | BGLC | 12 | 9.101  | -2.405-161.416 | 1.00 | 0.00 | CARL |
| ATOM | 4848 | O2  | BGLC | 12 | 11.099 | -2.148-160.974 | 1.00 | 2.00 | CARL |
| ATOM | 4849 | HO2 | BGLC | 12 | 11.171 | -3.097-161.026 | 1.00 | 0.00 | CARL |
| ATOM | 4850 | C3  | BGLC | 12 | 10.023 | -0.967-162.798 | 1.00 | 2.00 | CARL |
| ATOM | 4851 | H3  | BGLC | 12 | 10.688 | -0.104-162.796 | 1.00 | 0.00 | CARL |
| ATOM | 4852 | O3  | BGLC | 12 | 10.457 | -1.991-163.675 | 1.00 | 2.00 | CARL |
| ATOM | 4853 | HO3 | BGLC | 12 | 11.336 | -2.332-163.624 | 1.00 | 0.00 | CARL |
| ATOM | 4854 | C4  | BGLC | 12 | 8.668  | -0.370-163.204 | 1.00 | 2.00 | CARL |
| ATOM | 4855 | H4  | BGLC | 12 | 7.903  | -1.137-163.278 | 1.00 | 0.00 | CARL |
| ATOM | 4856 | O4  | BGLC | 12 | 8.628  | 0.171-164.488  | 1.00 | 2.00 | CARL |
| ATOM | 4857 | C6  | BGLC | 12 | 6.759  | 1.095-162.427  | 1.00 | 2.00 | CARL |
| ATOM | 4858 | H61 | BGLC | 12 | 6.313  | 0.168-162.934  | 1.00 | 0.00 | CARL |

|      |      |     |      |    |        |                |      |      |      |
|------|------|-----|------|----|--------|----------------|------|------|------|
| ATOM | 4859 | H62 | BGLC | 12 | 6.106  | 1.259-161.576  | 1.00 | 0.00 | CARL |
| ATOM | 4860 | O6  | BGLC | 12 | 6.699  | 2.097-163.422  | 1.00 | 2.00 | CARL |
| ATOM | 4861 | HO6 | BGLC | 12 | 7.214  | 2.890-163.307  | 1.00 | 0.00 | CARL |
| ATOM | 4862 | C1  | BGLC | 13 | 8.465  | -0.346-165.624 | 1.00 | 2.00 | CARL |
| ATOM | 4863 | H1  | BGLC | 13 | 7.663  | -1.075-165.614 | 1.00 | 0.00 | CARL |
| ATOM | 4864 | C5  | BGLC | 13 | 9.634  | -1.522-167.340 | 1.00 | 2.00 | CARL |
| ATOM | 4865 | H5  | BGLC | 13 | 8.934  | -2.381-167.382 | 1.00 | 0.00 | CARL |
| ATOM | 4866 | O5  | BGLC | 13 | 9.663  | -0.955-166.043 | 1.00 | 2.00 | CARL |
| ATOM | 4867 | C2  | BGLC | 13 | 7.988  | 0.713-166.611  | 1.00 | 2.00 | CARL |
| ATOM | 4868 | H2  | BGLC | 13 | 8.763  | 1.546-166.613  | 1.00 | 0.00 | CARL |
| ATOM | 4869 | O2  | BGLC | 13 | 6.765  | 1.290-166.169  | 1.00 | 2.00 | CARL |
| ATOM | 4870 | HO2 | BGLC | 13 | 6.692  | 2.238-166.225  | 1.00 | 0.00 | CARL |
| ATOM | 4871 | C3  | BGLC | 13 | 7.840  | 0.105-167.990  | 1.00 | 2.00 | CARL |
| ATOM | 4872 | H3  | BGLC | 13 | 7.173  | -0.757-167.984 | 1.00 | 0.00 | CARL |
| ATOM | 4873 | O3  | BGLC | 13 | 7.406  | 1.124-168.869  | 1.00 | 2.00 | CARL |
| ATOM | 4874 | HO3 | BGLC | 13 | 6.527  | 1.465-168.819  | 1.00 | 0.00 | CARL |
| ATOM | 4875 | C4  | BGLC | 13 | 9.192  | -0.495-168.394 | 1.00 | 2.00 | CARL |
| ATOM | 4876 | H4  | BGLC | 13 | 9.955  | 0.274-168.471  | 1.00 | 0.00 | CARL |
| ATOM | 4877 | O4  | BGLC | 13 | 9.233  | -1.043-169.676 | 1.00 | 2.00 | CARL |
| ATOM | 4878 | C6  | BGLC | 13 | 11.104 | -1.957-167.613 | 1.00 | 2.00 | CARL |
| ATOM | 4879 | O61 | BGLC | 13 | 11.196 | -3.350-167.850 | 1.00 | 0.00 | CARL |
| ATOM | 4880 | O62 | BGLC | 13 | 11.747 | -1.073-167.560 | 1.00 | 0.00 | CARL |
| ATOM | 4881 | C1  | BGLC | 14 | 9.395  | -0.529-170.814 | 1.00 | 2.00 | CARL |
| ATOM | 4882 | H1  | BGLC | 14 | 10.197 | 0.200-170.807  | 1.00 | 0.00 | CARL |
| ATOM | 4883 | C5  | BGLC | 14 | 8.226  | 0.641-172.534  | 1.00 | 2.00 | CARL |
| ATOM | 4884 | H5  | BGLC | 14 | 8.925  | 1.501-172.580  | 1.00 | 0.00 | CARL |
| ATOM | 4885 | O5  | BGLC | 14 | 8.198  | 0.079-171.235  | 1.00 | 2.00 | CARL |
| ATOM | 4886 | C2  | BGLC | 14 | 9.871  | -1.592-171.797 | 1.00 | 2.00 | CARL |
| ATOM | 4887 | H2  | BGLC | 14 | 9.096  | -2.424-171.795 | 1.00 | 0.00 | CARL |
| ATOM | 4888 | O2  | BGLC | 14 | 11.095 | -2.169-171.354 | 1.00 | 2.00 | CARL |
| ATOM | 4889 | HO2 | BGLC | 14 | 11.167 | -3.118-171.406 | 1.00 | 0.00 | CARL |
| ATOM | 4890 | C3  | BGLC | 14 | 10.018 | -0.989-173.178 | 1.00 | 2.00 | CARL |
| ATOM | 4891 | H3  | BGLC | 14 | 10.685 | -0.127-173.175 | 1.00 | 0.00 | CARL |
| ATOM | 4892 | O3  | BGLC | 14 | 10.452 | -2.012-174.055 | 1.00 | 2.00 | CARL |
| ATOM | 4893 | HO3 | BGLC | 14 | 11.331 | -2.353-174.004 | 1.00 | 0.00 | CARL |
| ATOM | 4894 | C4  | BGLC | 14 | 8.665  | -0.390-173.584 | 1.00 | 2.00 | CARL |
| ATOM | 4895 | H4  | BGLC | 14 | 7.902  | -1.159-173.657 | 1.00 | 0.00 | CARL |
| ATOM | 4896 | O4  | BGLC | 14 | 8.623  | 0.151-174.868  | 1.00 | 2.00 | CARL |
| ATOM | 4897 | C6  | BGLC | 14 | 6.755  | 1.074-172.807  | 1.00 | 2.00 | CARL |
| ATOM | 4898 | H61 | BGLC | 14 | 6.310  | 0.147-173.315  | 1.00 | 0.00 | CARL |
| ATOM | 4899 | H62 | BGLC | 14 | 6.101  | 1.236-171.956  | 1.00 | 0.00 | CARL |
| ATOM | 4900 | O6  | BGLC | 14 | 6.694  | 2.077-173.802  | 1.00 | 2.00 | CARL |
| ATOM | 4901 | HO6 | BGLC | 14 | 7.208  | 2.870-173.686  | 1.00 | 0.00 | CARL |
| ATOM | 4902 | C1  | BGLC | 15 | 8.461  | -0.367-176.004 | 1.00 | 2.00 | CARL |
| ATOM | 4903 | H1  | BGLC | 15 | 7.659  | -1.096-175.994 | 1.00 | 0.00 | CARL |
| ATOM | 4904 | C5  | BGLC | 15 | 9.629  | -1.543-177.720 | 1.00 | 2.00 | CARL |
| ATOM | 4905 | H5  | BGLC | 15 | 8.929  | -2.402-177.763 | 1.00 | 0.00 | CARL |
| ATOM | 4906 | O5  | BGLC | 15 | 9.658  | -0.977-176.423 | 1.00 | 2.00 | CARL |
| ATOM | 4907 | C2  | BGLC | 15 | 7.985  | 0.693-176.991  | 1.00 | 2.00 | CARL |
| ATOM | 4908 | H2  | BGLC | 15 | 8.760  | 1.526-176.994  | 1.00 | 0.00 | CARL |
| ATOM | 4909 | O2  | BGLC | 15 | 6.761  | 1.270-176.549  | 1.00 | 2.00 | CARL |
| ATOM | 4910 | HO2 | BGLC | 15 | 6.689  | 2.218-176.604  | 1.00 | 0.00 | CARL |
| ATOM | 4911 | C3  | BGLC | 15 | 7.835  | 0.084-178.370  | 1.00 | 2.00 | CARL |
| ATOM | 4912 | H3  | BGLC | 15 | 7.169  | -0.778-178.364 | 1.00 | 0.00 | CARL |

|      |      |     |      |    |        |                |      |      |      |
|------|------|-----|------|----|--------|----------------|------|------|------|
| ATOM | 4913 | O3  | BGLC | 15 | 7.401  | 1.102-179.249  | 1.00 | 2.00 | CARL |
| ATOM | 4914 | HO3 | BGLC | 15 | 6.522  | 1.444-179.198  | 1.00 | 0.00 | CARL |
| ATOM | 4915 | C4  | BGLC | 15 | 9.188  | -0.515-178.774 | 1.00 | 2.00 | CARL |
| ATOM | 4916 | H4  | BGLC | 15 | 9.952  | 0.252-178.852  | 1.00 | 0.00 | CARL |
| ATOM | 4917 | O4  | BGLC | 15 | 9.226  | -1.062-180.056 | 1.00 | 2.00 | CARL |
| ATOM | 4918 | C6  | BGLC | 15 | 11.099 | -1.978-177.993 | 1.00 | 2.00 | CARL |
| ATOM | 4919 | H61 | BGLC | 15 | 11.543 | -1.052-178.503 | 1.00 | 0.00 | CARL |
| ATOM | 4920 | H62 | BGLC | 15 | 11.753 | -2.138-177.142 | 1.00 | 0.00 | CARL |
| ATOM | 4921 | O6  | BGLC | 15 | 11.160 | -2.983-178.984 | 1.00 | 2.00 | CARL |
| ATOM | 4922 | HO6 | BGLC | 15 | 10.646 | -3.776-178.866 | 1.00 | 0.00 | CARL |
| ATOM | 4923 | C1  | BGLC | 16 | 9.392  | -0.550-181.194 | 1.00 | 2.00 | CARL |
| ATOM | 4924 | H1  | BGLC | 16 | 10.195 | 0.178-181.185  | 1.00 | 0.00 | CARL |
| ATOM | 4925 | C5  | BGLC | 16 | 8.222  | 0.620-182.914  | 1.00 | 2.00 | CARL |
| ATOM | 4926 | H5  | BGLC | 16 | 8.922  | 1.479-182.960  | 1.00 | 0.00 | CARL |
| ATOM | 4927 | O5  | BGLC | 16 | 8.194  | 0.058-181.615  | 1.00 | 2.00 | CARL |
| ATOM | 4928 | C2  | BGLC | 16 | 9.866  | -1.613-182.177 | 1.00 | 2.00 | CARL |
| ATOM | 4929 | H2  | BGLC | 16 | 9.091  | -2.446-182.175 | 1.00 | 0.00 | CARL |
| ATOM | 4930 | O2  | BGLC | 16 | 11.090 | -2.189-181.734 | 1.00 | 2.00 | CARL |
| ATOM | 4931 | HO2 | BGLC | 16 | 11.162 | -3.138-181.785 | 1.00 | 0.00 | CARL |
| ATOM | 4932 | C3  | BGLC | 16 | 10.014 | -1.010-183.558 | 1.00 | 2.00 | CARL |
| ATOM | 4933 | H3  | BGLC | 16 | 10.681 | -0.148-183.555 | 1.00 | 0.00 | CARL |
| ATOM | 4934 | O3  | BGLC | 16 | 10.448 | -2.033-184.434 | 1.00 | 2.00 | CARL |
| ATOM | 4935 | HO3 | BGLC | 16 | 11.327 | -2.374-184.383 | 1.00 | 0.00 | CARL |
| ATOM | 4936 | C4  | BGLC | 16 | 8.660  | -0.411-183.964 | 1.00 | 2.00 | CARL |
| ATOM | 4937 | H4  | BGLC | 16 | 7.896  | -1.179-184.036 | 1.00 | 0.00 | CARL |
| ATOM | 4938 | O4  | BGLC | 16 | 8.618  | 0.130-185.248  | 1.00 | 2.00 | CARL |
| ATOM | 4939 | C6  | BGLC | 16 | 6.750  | 1.054-183.187  | 1.00 | 2.00 | CARL |
| ATOM | 4940 | H61 | BGLC | 16 | 6.305  | 0.127-183.694  | 1.00 | 0.00 | CARL |
| ATOM | 4941 | H62 | BGLC | 16 | 6.097  | 1.217-182.336  | 1.00 | 0.00 | CARL |
| ATOM | 4942 | O6  | BGLC | 16 | 6.690  | 2.056-184.182  | 1.00 | 2.00 | CARL |
| ATOM | 4943 | HO6 | BGLC | 16 | 7.204  | 2.849-184.066  | 1.00 | 0.00 | CARL |
| ATOM | 4944 | C1  | BGLC | 17 | 8.456  | -0.387-186.384 | 1.00 | 2.00 | CARL |
| ATOM | 4945 | H1  | BGLC | 17 | 7.654  | -1.116-186.374 | 1.00 | 0.00 | CARL |
| ATOM | 4946 | C5  | BGLC | 17 | 9.625  | -1.564-188.100 | 1.00 | 2.00 | CARL |
| ATOM | 4947 | H5  | BGLC | 17 | 8.926  | -2.424-188.141 | 1.00 | 0.00 | CARL |
| ATOM | 4948 | O5  | BGLC | 17 | 9.654  | -0.996-186.803 | 1.00 | 2.00 | CARL |
| ATOM | 4949 | C2  | BGLC | 17 | 7.980  | 0.671-187.371  | 1.00 | 2.00 | CARL |
| ATOM | 4950 | H2  | BGLC | 17 | 8.755  | 1.503-187.373  | 1.00 | 0.00 | CARL |
| ATOM | 4951 | O2  | BGLC | 17 | 6.756  | 1.249-186.929  | 1.00 | 2.00 | CARL |
| ATOM | 4952 | HO2 | BGLC | 17 | 6.684  | 2.197-186.985  | 1.00 | 0.00 | CARL |
| ATOM | 4953 | C3  | BGLC | 17 | 7.831  | 0.063-188.750  | 1.00 | 2.00 | CARL |
| ATOM | 4954 | H3  | BGLC | 17 | 7.165  | -0.799-188.744 | 1.00 | 0.00 | CARL |
| ATOM | 4955 | O3  | BGLC | 17 | 7.396  | 1.082-189.629  | 1.00 | 2.00 | CARL |
| ATOM | 4956 | HO3 | BGLC | 17 | 6.517  | 1.423-189.578  | 1.00 | 0.00 | CARL |
| ATOM | 4957 | C4  | BGLC | 17 | 9.185  | -0.537-189.154 | 1.00 | 2.00 | CARL |
| ATOM | 4958 | H4  | BGLC | 17 | 9.949  | 0.230-189.232  | 1.00 | 0.00 | CARL |
| ATOM | 4959 | O4  | BGLC | 17 | 9.223  | -1.083-190.436 | 1.00 | 2.00 | CARL |
| ATOM | 4960 | C6  | BGLC | 17 | 11.095 | -1.998-188.373 | 1.00 | 2.00 | CARL |
| ATOM | 4961 | H61 | BGLC | 17 | 11.539 | -1.073-188.884 | 1.00 | 0.00 | CARL |
| ATOM | 4962 | H62 | BGLC | 17 | 11.749 | -2.157-187.522 | 1.00 | 0.00 | CARL |
| ATOM | 4963 | O6  | BGLC | 17 | 11.155 | -3.004-189.364 | 1.00 | 2.00 | CARL |
| ATOM | 4964 | HO6 | BGLC | 17 | 10.642 | -3.797-189.245 | 1.00 | 0.00 | CARL |
| ATOM | 4965 | C1  | BGLC | 18 | 9.386  | -0.571-191.574 | 1.00 | 2.00 | CARL |
| ATOM | 4966 | H1  | BGLC | 18 | 10.189 | 0.157-191.567  | 1.00 | 0.00 | CARL |

|      |      |     |      |    |        |                |      |      |      |
|------|------|-----|------|----|--------|----------------|------|------|------|
| ATOM | 4967 | C5  | BGLC | 18 | 8.217  | 0.600-193.294  | 1.00 | 2.00 | CARL |
| ATOM | 4968 | H5  | BGLC | 18 | 8.917  | 1.459-193.339  | 1.00 | 0.00 | CARL |
| ATOM | 4969 | O5  | BGLC | 18 | 8.189  | 0.037-191.995  | 1.00 | 2.00 | CARL |
| ATOM | 4970 | C2  | BGLC | 18 | 9.863  | -1.633-192.557 | 1.00 | 2.00 | CARL |
| ATOM | 4971 | H2  | BGLC | 18 | 9.088  | -2.465-192.554 | 1.00 | 0.00 | CARL |
| ATOM | 4972 | O2  | BGLC | 18 | 11.086 | -2.210-192.114 | 1.00 | 2.00 | CARL |
| ATOM | 4973 | HO2 | BGLC | 18 | 11.158 | -3.159-192.167 | 1.00 | 0.00 | CARL |
| ATOM | 4974 | C3  | BGLC | 18 | 10.009 | -1.030-193.938 | 1.00 | 2.00 | CARL |
| ATOM | 4975 | H3  | BGLC | 18 | 10.675 | -0.167-193.936 | 1.00 | 0.00 | CARL |
| ATOM | 4976 | O3  | BGLC | 18 | 10.443 | -2.053-194.814 | 1.00 | 2.00 | CARL |
| ATOM | 4977 | HO3 | BGLC | 18 | 11.322 | -2.393-194.763 | 1.00 | 0.00 | CARL |
| ATOM | 4978 | C4  | BGLC | 18 | 8.655  | -0.433-194.344 | 1.00 | 2.00 | CARL |
| ATOM | 4979 | H4  | BGLC | 18 | 7.890  | -1.200-194.417 | 1.00 | 0.00 | CARL |
| ATOM | 4980 | O4  | BGLC | 18 | 8.614  | 0.110-195.628  | 1.00 | 2.00 | CARL |
| ATOM | 4981 | C6  | BGLC | 18 | 6.746  | 1.034-193.567  | 1.00 | 2.00 | CARL |
| ATOM | 4982 | H61 | BGLC | 18 | 6.301  | 0.106-194.073  | 1.00 | 0.00 | CARL |
| ATOM | 4983 | H62 | BGLC | 18 | 6.093  | 1.198-192.716  | 1.00 | 0.00 | CARL |
| ATOM | 4984 | O6  | BGLC | 18 | 6.685  | 2.035-194.562  | 1.00 | 2.00 | CARL |
| ATOM | 4985 | HO6 | BGLC | 18 | 7.199  | 2.828-194.447  | 1.00 | 0.00 | CARL |
| ATOM | 4986 | C1  | BGLC | 19 | 8.452  | -0.408-196.764 | 1.00 | 2.00 | CARL |
| ATOM | 4987 | H1  | BGLC | 19 | 7.650  | -1.137-196.754 | 1.00 | 0.00 | CARL |
| ATOM | 4988 | C5  | BGLC | 19 | 9.620  | -1.585-198.480 | 1.00 | 2.00 | CARL |
| ATOM | 4989 | H5  | BGLC | 19 | 8.921  | -2.445-198.521 | 1.00 | 0.00 | CARL |
| ATOM | 4990 | O5  | BGLC | 19 | 9.649  | -1.017-197.183 | 1.00 | 2.00 | CARL |
| ATOM | 4991 | C2  | BGLC | 19 | 7.975  | 0.651-197.751  | 1.00 | 2.00 | CARL |
| ATOM | 4992 | H2  | BGLC | 19 | 8.751  | 1.483-197.753  | 1.00 | 0.00 | CARL |
| ATOM | 4993 | O2  | BGLC | 19 | 6.752  | 1.230-197.309  | 1.00 | 2.00 | CARL |
| ATOM | 4994 | HO2 | BGLC | 19 | 6.680  | 2.178-197.365  | 1.00 | 0.00 | CARL |
| ATOM | 4995 | C3  | BGLC | 19 | 7.826  | 0.042-199.130  | 1.00 | 2.00 | CARL |
| ATOM | 4996 | H3  | BGLC | 19 | 7.160  | -0.820-199.124 | 1.00 | 0.00 | CARL |
| ATOM | 4997 | O3  | BGLC | 19 | 7.391  | 1.061-200.009  | 1.00 | 2.00 | CARL |
| ATOM | 4998 | HO3 | BGLC | 19 | 6.512  | 1.402-199.958  | 1.00 | 0.00 | CARL |
| ATOM | 4999 | C4  | BGLC | 19 | 9.180  | -0.557-199.534 | 1.00 | 2.00 | CARL |
| ATOM | 5000 | H4  | BGLC | 19 | 9.944  | 0.210-199.611  | 1.00 | 0.00 | CARL |
| ATOM | 5001 | O4  | BGLC | 19 | 9.219  | -1.105-200.816 | 1.00 | 2.00 | CARL |
| ATOM | 5002 | C6  | BGLC | 19 | 11.091 | -2.019-198.753 | 1.00 | 2.00 | CARL |
| ATOM | 5003 | H61 | BGLC | 19 | 11.536 | -1.094-199.264 | 1.00 | 0.00 | CARL |
| ATOM | 5004 | H62 | BGLC | 19 | 11.745 | -2.179-197.902 | 1.00 | 0.00 | CARL |
| ATOM | 5005 | O6  | BGLC | 19 | 11.150 | -3.024-199.744 | 1.00 | 2.00 | CARL |
| ATOM | 5006 | HO6 | BGLC | 19 | 10.636 | -3.817-199.625 | 1.00 | 0.00 | CARL |
| ATOM | 5007 | C1  | BGLC | 20 | 9.382  | -0.593-201.954 | 1.00 | 2.00 | CARL |
| ATOM | 5008 | H1  | BGLC | 20 | 10.185 | 0.134-201.947  | 1.00 | 0.00 | CARL |
| ATOM | 5009 | C5  | BGLC | 20 | 8.212  | 0.578-203.674  | 1.00 | 2.00 | CARL |
| ATOM | 5010 | H5  | BGLC | 20 | 8.912  | 1.437-203.721  | 1.00 | 0.00 | CARL |
| ATOM | 5011 | O5  | BGLC | 20 | 8.184  | 0.017-202.375  | 1.00 | 2.00 | CARL |
| ATOM | 5012 | C2  | BGLC | 20 | 9.858  | -1.655-202.937 | 1.00 | 2.00 | CARL |
| ATOM | 5013 | H2  | BGLC | 20 | 9.083  | -2.488-202.936 | 1.00 | 0.00 | CARL |
| ATOM | 5014 | O2  | BGLC | 20 | 11.081 | -2.231-202.494 | 1.00 | 2.00 | CARL |
| ATOM | 5015 | HO2 | BGLC | 20 | 11.153 | -3.180-202.546 | 1.00 | 0.00 | CARL |
| ATOM | 5016 | C3  | BGLC | 20 | 10.005 | -1.050-204.318 | 1.00 | 2.00 | CARL |
| ATOM | 5017 | H3  | BGLC | 20 | 10.671 | -0.188-204.317 | 1.00 | 0.00 | CARL |
| ATOM | 5018 | O3  | BGLC | 20 | 10.440 | -2.075-205.194 | 1.00 | 2.00 | CARL |
| ATOM | 5019 | HO3 | BGLC | 20 | 11.319 | -2.416-205.142 | 1.00 | 0.00 | CARL |
| ATOM | 5020 | C4  | BGLC | 20 | 8.651  | -0.453-204.724 | 1.00 | 2.00 | CARL |

|      |      |     |      |    |         |                |      |      |      |
|------|------|-----|------|----|---------|----------------|------|------|------|
| ATOM | 5021 | H4  | BGLC | 20 | 7.824   | -1.130-204.913 | 1.00 | 0.00 | CARL |
| ATOM | 5022 | O4  | BGLC | 20 | 8.768   | 0.283-205.951  | 1.00 | 2.00 | CARL |
| ATOM | 5023 | HO4 | BGLC | 20 | 9.266   | -0.261-206.613 | 1.00 | 0.00 | CARL |
| ATOM | 5024 | C6  | BGLC | 20 | 6.741   | 1.012-203.947  | 1.00 | 2.00 | CARL |
| ATOM | 5025 | H61 | BGLC | 20 | 6.296   | 0.085-204.454  | 1.00 | 0.00 | CARL |
| ATOM | 5026 | H62 | BGLC | 20 | 6.088   | 1.175-203.096  | 1.00 | 0.00 | CARL |
| ATOM | 5027 | O6  | BGLC | 20 | 6.680   | 2.015-204.942  | 1.00 | 2.00 | CARL |
| ATOM | 5028 | HO6 | BGLC | 20 | 7.194   | 2.808-204.826  | 1.00 | 0.00 | CARL |
| ATOM | 5029 | C1  | BGLC | 1  | -9.422  | 5.915-103.349  | 1.00 | 2.00 | CARM |
| ATOM | 5030 | H1  | BGLC | 1  | -10.266 | 5.244-103.241  | 1.00 | 0.00 | CARM |
| ATOM | 5031 | O1  | BGLC | 1  | -9.100  | 6.627-102.156  | 1.00 | 2.00 | CARM |
| ATOM | 5032 | HO1 | BGLC | 1  | -8.592  | 7.365-102.417  | 1.00 | 0.00 | CARM |
| ATOM | 5033 | C5  | BGLC | 1  | -8.253  | 4.739-105.065  | 1.00 | 2.00 | CARM |
| ATOM | 5034 | H5  | BGLC | 1  | -8.953  | 3.880-105.107  | 1.00 | 0.00 | CARM |
| ATOM | 5035 | O5  | BGLC | 1  | -8.223  | 5.305-103.768  | 1.00 | 2.00 | CARM |
| ATOM | 5036 | C2  | BGLC | 1  | -9.898  | 6.975-104.336  | 1.00 | 2.00 | CARM |
| ATOM | 5037 | H2  | BGLC | 1  | -9.124  | 7.808-104.339  | 1.00 | 0.00 | CARM |
| ATOM | 5038 | O2  | BGLC | 1  | -11.121 | 7.552-103.894  | 1.00 | 2.00 | CARM |
| ATOM | 5039 | HO2 | BGLC | 1  | -11.193 | 8.500-103.949  | 1.00 | 0.00 | CARM |
| ATOM | 5040 | C3  | BGLC | 1  | -10.047 | 6.365-105.714  | 1.00 | 2.00 | CARM |
| ATOM | 5041 | H3  | BGLC | 1  | -10.714 | 5.504-105.707  | 1.00 | 0.00 | CARM |
| ATOM | 5042 | O3  | BGLC | 1  | -10.482 | 7.385-106.594  | 1.00 | 2.00 | CARM |
| ATOM | 5043 | HO3 | BGLC | 1  | -11.361 | 7.726-106.543  | 1.00 | 0.00 | CARM |
| ATOM | 5044 | C4  | BGLC | 1  | -8.695  | 5.764-106.119  | 1.00 | 2.00 | CARM |
| ATOM | 5045 | H4  | BGLC | 1  | -7.933  | 6.534-106.196  | 1.00 | 0.00 | CARM |
| ATOM | 5046 | O4  | BGLC | 1  | -8.653  | 5.218-107.400  | 1.00 | 2.00 | CARM |
| ATOM | 5047 | C6  | BGLC | 1  | -6.782  | 4.304-105.338  | 1.00 | 2.00 | CARM |
| ATOM | 5048 | H61 | BGLC | 1  | -6.337  | 5.230-105.849  | 1.00 | 0.00 | CARM |
| ATOM | 5049 | H62 | BGLC | 1  | -6.128  | 4.144-104.487  | 1.00 | 0.00 | CARM |
| ATOM | 5050 | O6  | BGLC | 1  | -6.722  | 3.299-106.329  | 1.00 | 2.00 | CARM |
| ATOM | 5051 | HO6 | BGLC | 1  | -7.236  | 2.506-106.210  | 1.00 | 0.00 | CARM |
| ATOM | 5052 | C1  | BGLC | 2  | -8.492  | 5.731-108.539  | 1.00 | 2.00 | CARM |
| ATOM | 5053 | H1  | BGLC | 2  | -7.690  | 6.459-108.533  | 1.00 | 0.00 | CARM |
| ATOM | 5054 | C5  | BGLC | 2  | -9.660  | 6.901-110.259  | 1.00 | 2.00 | CARM |
| ATOM | 5055 | H5  | BGLC | 2  | -8.960  | 7.760-110.305  | 1.00 | 0.00 | CARM |
| ATOM | 5056 | O5  | BGLC | 2  | -9.688  | 6.339-108.959  | 1.00 | 2.00 | CARM |
| ATOM | 5057 | C2  | BGLC | 2  | -8.015  | 4.669-109.522  | 1.00 | 2.00 | CARM |
| ATOM | 5058 | H2  | BGLC | 2  | -8.790  | 3.837-109.520  | 1.00 | 0.00 | CARM |
| ATOM | 5059 | O2  | BGLC | 2  | -6.792  | 4.092-109.079  | 1.00 | 2.00 | CARM |
| ATOM | 5060 | HO2 | BGLC | 2  | -6.720  | 3.143-109.132  | 1.00 | 0.00 | CARM |
| ATOM | 5061 | C3  | BGLC | 2  | -7.868  | 5.273-110.903  | 1.00 | 2.00 | CARM |
| ATOM | 5062 | H3  | BGLC | 2  | -7.202  | 6.135-110.902  | 1.00 | 0.00 | CARM |
| ATOM | 5063 | O3  | BGLC | 2  | -7.435  | 4.248-111.779  | 1.00 | 2.00 | CARM |
| ATOM | 5064 | HO3 | BGLC | 2  | -6.556  | 3.906-111.728  | 1.00 | 0.00 | CARM |
| ATOM | 5065 | C4  | BGLC | 2  | -9.221  | 5.870-111.309  | 1.00 | 2.00 | CARM |
| ATOM | 5066 | H4  | BGLC | 2  | -9.985  | 5.102-111.383  | 1.00 | 0.00 | CARM |
| ATOM | 5067 | O4  | BGLC | 2  | -9.261  | 6.411-112.593  | 1.00 | 2.00 | CARM |
| ATOM | 5068 | C6  | BGLC | 2  | -11.131 | 7.336-110.532  | 1.00 | 2.00 | CARM |
| ATOM | 5069 | H61 | BGLC | 2  | -11.577 | 6.409-111.038  | 1.00 | 0.00 | CARM |
| ATOM | 5070 | H62 | BGLC | 2  | -11.784 | 7.500-109.681  | 1.00 | 0.00 | CARM |
| ATOM | 5071 | O6  | BGLC | 2  | -11.191 | 8.337-111.527  | 1.00 | 2.00 | CARM |
| ATOM | 5072 | HO6 | BGLC | 2  | -10.676 | 9.130-111.412  | 1.00 | 0.00 | CARM |
| ATOM | 5073 | C1  | BGLC | 3  | -9.427  | 5.894-113.729  | 1.00 | 2.00 | CARM |
| ATOM | 5074 | H1  | BGLC | 3  | -10.229 | 5.166-113.717  | 1.00 | 0.00 | CARM |

|      |      |     |      |   |         |               |      |      |      |
|------|------|-----|------|---|---------|---------------|------|------|------|
| ATOM | 5075 | C5  | BGLC | 3 | -8.257  | 4.719-115.445 | 1.00 | 2.00 | CARM |
| ATOM | 5076 | H5  | BGLC | 3 | -8.957  | 3.860-115.488 | 1.00 | 0.00 | CARM |
| ATOM | 5077 | O5  | BGLC | 3 | -8.228  | 5.285-114.148 | 1.00 | 2.00 | CARM |
| ATOM | 5078 | C2  | BGLC | 3 | -9.902  | 6.954-114.716 | 1.00 | 2.00 | CARM |
| ATOM | 5079 | H2  | BGLC | 3 | -9.128  | 7.787-114.718 | 1.00 | 0.00 | CARM |
| ATOM | 5080 | O2  | BGLC | 3 | -11.125 | 7.531-114.274 | 1.00 | 2.00 | CARM |
| ATOM | 5081 | HO2 | BGLC | 3 | -11.197 | 8.479-114.329 | 1.00 | 0.00 | CARM |
| ATOM | 5082 | C3  | BGLC | 3 | -10.050 | 6.345-116.094 | 1.00 | 2.00 | CARM |
| ATOM | 5083 | H3  | BGLC | 3 | -10.717 | 5.484-116.086 | 1.00 | 0.00 | CARM |
| ATOM | 5084 | O3  | BGLC | 3 | -10.486 | 7.365-116.974 | 1.00 | 2.00 | CARM |
| ATOM | 5085 | HO3 | BGLC | 3 | -11.365 | 7.705-116.923 | 1.00 | 0.00 | CARM |
| ATOM | 5086 | C4  | BGLC | 3 | -8.698  | 5.744-116.499 | 1.00 | 2.00 | CARM |
| ATOM | 5087 | H4  | BGLC | 3 | -7.935  | 6.513-116.576 | 1.00 | 0.00 | CARM |
| ATOM | 5088 | O4  | BGLC | 3 | -8.657  | 5.197-117.780 | 1.00 | 2.00 | CARM |
| ATOM | 5089 | C6  | BGLC | 3 | -6.787  | 4.284-115.718 | 1.00 | 2.00 | CARM |
| ATOM | 5090 | H61 | BGLC | 3 | -6.343  | 5.209-116.229 | 1.00 | 0.00 | CARM |
| ATOM | 5091 | H62 | BGLC | 3 | -6.133  | 4.124-114.867 | 1.00 | 0.00 | CARM |
| ATOM | 5092 | O6  | BGLC | 3 | -6.727  | 3.278-116.709 | 1.00 | 2.00 | CARM |
| ATOM | 5093 | HO6 | BGLC | 3 | -7.241  | 2.485-116.590 | 1.00 | 0.00 | CARM |
| ATOM | 5094 | C1  | BGLC | 4 | -8.496  | 5.711-118.919 | 1.00 | 2.00 | CARM |
| ATOM | 5095 | H1  | BGLC | 4 | -7.694  | 6.440-118.913 | 1.00 | 0.00 | CARM |
| ATOM | 5096 | C5  | BGLC | 4 | -9.665  | 6.881-120.639 | 1.00 | 2.00 | CARM |
| ATOM | 5097 | H5  | BGLC | 4 | -8.966  | 7.741-120.686 | 1.00 | 0.00 | CARM |
| ATOM | 5098 | O5  | BGLC | 4 | -9.692  | 6.319-119.339 | 1.00 | 2.00 | CARM |
| ATOM | 5099 | C2  | BGLC | 4 | -8.020  | 4.649-119.902 | 1.00 | 2.00 | CARM |
| ATOM | 5100 | H2  | BGLC | 4 | -8.796  | 3.817-119.900 | 1.00 | 0.00 | CARM |
| ATOM | 5101 | O2  | BGLC | 4 | -6.796  | 4.071-119.459 | 1.00 | 2.00 | CARM |
| ATOM | 5102 | HO2 | BGLC | 4 | -6.725  | 3.122-119.512 | 1.00 | 0.00 | CARM |
| ATOM | 5103 | C3  | BGLC | 4 | -7.872  | 5.252-121.283 | 1.00 | 2.00 | CARM |
| ATOM | 5104 | H3  | BGLC | 4 | -7.207  | 6.115-121.282 | 1.00 | 0.00 | CARM |
| ATOM | 5105 | O3  | BGLC | 4 | -7.439  | 4.228-122.159 | 1.00 | 2.00 | CARM |
| ATOM | 5106 | HO3 | BGLC | 4 | -6.560  | 3.886-122.108 | 1.00 | 0.00 | CARM |
| ATOM | 5107 | C4  | BGLC | 4 | -9.226  | 5.848-121.689 | 1.00 | 2.00 | CARM |
| ATOM | 5108 | H4  | BGLC | 4 | -9.991  | 5.081-121.762 | 1.00 | 0.00 | CARM |
| ATOM | 5109 | O4  | BGLC | 4 | -9.266  | 6.391-122.973 | 1.00 | 2.00 | CARM |
| ATOM | 5110 | C6  | BGLC | 4 | -11.136 | 7.314-120.912 | 1.00 | 2.00 | CARM |
| ATOM | 5111 | H61 | BGLC | 4 | -11.581 | 6.387-121.419 | 1.00 | 0.00 | CARM |
| ATOM | 5112 | H62 | BGLC | 4 | -11.789 | 7.477-120.061 | 1.00 | 0.00 | CARM |
| ATOM | 5113 | O6  | BGLC | 4 | -11.196 | 8.316-121.907 | 1.00 | 2.00 | CARM |
| ATOM | 5114 | HO6 | BGLC | 4 | -10.682 | 9.109-121.791 | 1.00 | 0.00 | CARM |
| ATOM | 5115 | C1  | BGLC | 5 | -9.431  | 5.873-124.109 | 1.00 | 2.00 | CARM |
| ATOM | 5116 | H1  | BGLC | 5 | -10.233 | 5.144-124.097 | 1.00 | 0.00 | CARM |
| ATOM | 5117 | C5  | BGLC | 5 | -8.262  | 4.698-125.825 | 1.00 | 2.00 | CARM |
| ATOM | 5118 | H5  | BGLC | 5 | -8.963  | 3.839-125.867 | 1.00 | 0.00 | CARM |
| ATOM | 5119 | O5  | BGLC | 5 | -8.232  | 5.264-124.528 | 1.00 | 2.00 | CARM |
| ATOM | 5120 | C2  | BGLC | 5 | -9.907  | 6.934-125.096 | 1.00 | 2.00 | CARM |
| ATOM | 5121 | H2  | BGLC | 5 | -9.133  | 7.768-125.098 | 1.00 | 0.00 | CARM |
| ATOM | 5122 | O2  | BGLC | 5 | -11.130 | 7.511-124.654 | 1.00 | 2.00 | CARM |
| ATOM | 5123 | HO2 | BGLC | 5 | -11.202 | 8.459-124.709 | 1.00 | 0.00 | CARM |
| ATOM | 5124 | C3  | BGLC | 5 | -10.054 | 6.324-126.474 | 1.00 | 2.00 | CARM |
| ATOM | 5125 | H3  | BGLC | 5 | -10.721 | 5.462-126.466 | 1.00 | 0.00 | CARM |
| ATOM | 5126 | O3  | BGLC | 5 | -10.490 | 7.343-127.354 | 1.00 | 2.00 | CARM |
| ATOM | 5127 | HO3 | BGLC | 5 | -11.369 | 7.683-127.304 | 1.00 | 0.00 | CARM |
| ATOM | 5128 | C4  | BGLC | 5 | -8.702  | 5.723-126.879 | 1.00 | 2.00 | CARM |

|      |      |     |      |   |         |               |      |      |      |
|------|------|-----|------|---|---------|---------------|------|------|------|
| ATOM | 5129 | H4  | BGLC | 5 | -7.939  | 6.491-126.957 | 1.00 | 0.00 | CARM |
| ATOM | 5130 | O4  | BGLC | 5 | -8.662  | 5.176-128.160 | 1.00 | 2.00 | CARM |
| ATOM | 5131 | C6  | BGLC | 5 | -6.791  | 4.262-126.098 | 1.00 | 2.00 | CARM |
| ATOM | 5132 | H61 | BGLC | 5 | -6.346  | 5.187-126.609 | 1.00 | 0.00 | CARM |
| ATOM | 5133 | H62 | BGLC | 5 | -6.137  | 4.102-125.247 | 1.00 | 0.00 | CARM |
| ATOM | 5134 | O6  | BGLC | 5 | -6.731  | 3.256-127.089 | 1.00 | 2.00 | CARM |
| ATOM | 5135 | HO6 | BGLC | 5 | -7.245  | 2.463-126.970 | 1.00 | 0.00 | CARM |
| ATOM | 5136 | C1  | BGLC | 6 | -8.500  | 5.690-129.299 | 1.00 | 2.00 | CARM |
| ATOM | 5137 | H1  | BGLC | 6 | -7.698  | 6.418-129.292 | 1.00 | 0.00 | CARM |
| ATOM | 5138 | C5  | BGLC | 6 | -9.669  | 6.860-131.018 | 1.00 | 2.00 | CARM |
| ATOM | 5139 | H5  | BGLC | 6 | -8.970  | 7.720-131.064 | 1.00 | 0.00 | CARM |
| ATOM | 5140 | O5  | BGLC | 6 | -9.697  | 6.298-129.719 | 1.00 | 2.00 | CARM |
| ATOM | 5141 | C2  | BGLC | 6 | -8.024  | 4.627-130.282 | 1.00 | 2.00 | CARM |
| ATOM | 5142 | H2  | BGLC | 6 | -8.799  | 3.795-130.281 | 1.00 | 0.00 | CARM |
| ATOM | 5143 | O2  | BGLC | 6 | -6.800  | 4.050-129.839 | 1.00 | 2.00 | CARM |
| ATOM | 5144 | HO2 | BGLC | 6 | -6.728  | 3.101-129.891 | 1.00 | 0.00 | CARM |
| ATOM | 5145 | C3  | BGLC | 6 | -7.876  | 5.231-131.663 | 1.00 | 2.00 | CARM |
| ATOM | 5146 | H3  | BGLC | 6 | -7.210  | 6.093-131.662 | 1.00 | 0.00 | CARM |
| ATOM | 5147 | O3  | BGLC | 6 | -7.443  | 4.207-132.539 | 1.00 | 2.00 | CARM |
| ATOM | 5148 | HO3 | BGLC | 6 | -6.564  | 3.865-132.488 | 1.00 | 0.00 | CARM |
| ATOM | 5149 | C4  | BGLC | 6 | -9.230  | 5.829-132.069 | 1.00 | 2.00 | CARM |
| ATOM | 5150 | H4  | BGLC | 6 | -9.994  | 5.061-132.143 | 1.00 | 0.00 | CARM |
| ATOM | 5151 | O4  | BGLC | 6 | -9.270  | 6.370-133.353 | 1.00 | 2.00 | CARM |
| ATOM | 5152 | C6  | BGLC | 6 | -11.140 | 7.293-131.292 | 1.00 | 2.00 | CARM |
| ATOM | 5153 | O61 | BGLC | 6 | -11.233 | 8.685-131.535 | 1.00 | 0.00 | CARM |
| ATOM | 5154 | O62 | BGLC | 6 | -11.783 | 6.409-131.234 | 1.00 | 0.00 | CARM |
| ATOM | 5155 | C1  | BGLC | 7 | -9.435  | 5.853-134.489 | 1.00 | 2.00 | CARM |
| ATOM | 5156 | H1  | BGLC | 7 | -10.238 | 5.125-134.478 | 1.00 | 0.00 | CARM |
| ATOM | 5157 | C5  | BGLC | 7 | -8.267  | 4.676-136.205 | 1.00 | 2.00 | CARM |
| ATOM | 5158 | H5  | BGLC | 7 | -8.966  | 3.816-136.246 | 1.00 | 0.00 | CARM |
| ATOM | 5159 | O5  | BGLC | 7 | -8.237  | 5.243-134.908 | 1.00 | 2.00 | CARM |
| ATOM | 5160 | C2  | BGLC | 7 | -9.912  | 6.912-135.475 | 1.00 | 2.00 | CARM |
| ATOM | 5161 | H2  | BGLC | 7 | -9.137  | 7.745-135.476 | 1.00 | 0.00 | CARM |
| ATOM | 5162 | O2  | BGLC | 7 | -11.135 | 7.490-135.034 | 1.00 | 2.00 | CARM |
| ATOM | 5163 | HO2 | BGLC | 7 | -11.207 | 8.438-135.090 | 1.00 | 0.00 | CARM |
| ATOM | 5164 | C3  | BGLC | 7 | -10.059 | 6.303-136.854 | 1.00 | 2.00 | CARM |
| ATOM | 5165 | H3  | BGLC | 7 | -10.726 | 5.441-136.847 | 1.00 | 0.00 | CARM |
| ATOM | 5166 | O3  | BGLC | 7 | -10.495 | 7.323-137.734 | 1.00 | 2.00 | CARM |
| ATOM | 5167 | HO3 | BGLC | 7 | -11.374 | 7.663-137.684 | 1.00 | 0.00 | CARM |
| ATOM | 5168 | C4  | BGLC | 7 | -8.707  | 5.703-137.259 | 1.00 | 2.00 | CARM |
| ATOM | 5169 | H4  | BGLC | 7 | -7.943  | 6.471-137.336 | 1.00 | 0.00 | CARM |
| ATOM | 5170 | O4  | BGLC | 7 | -8.666  | 5.155-138.540 | 1.00 | 2.00 | CARM |
| ATOM | 5171 | C6  | BGLC | 7 | -6.795  | 4.243-136.477 | 1.00 | 2.00 | CARM |
| ATOM | 5172 | H61 | BGLC | 7 | -6.350  | 5.168-136.989 | 1.00 | 0.00 | CARM |
| ATOM | 5173 | H62 | BGLC | 7 | -6.141  | 4.084-135.625 | 1.00 | 0.00 | CARM |
| ATOM | 5174 | O6  | BGLC | 7 | -6.736  | 3.236-137.469 | 1.00 | 2.00 | CARM |
| ATOM | 5175 | HO6 | BGLC | 7 | -7.250  | 2.443-137.349 | 1.00 | 0.00 | CARM |
| ATOM | 5176 | C1  | BGLC | 8 | -8.504  | 5.669-139.679 | 1.00 | 2.00 | CARM |
| ATOM | 5177 | H1  | BGLC | 8 | -7.702  | 6.397-139.672 | 1.00 | 0.00 | CARM |
| ATOM | 5178 | C5  | BGLC | 8 | -9.674  | 6.840-141.398 | 1.00 | 2.00 | CARM |
| ATOM | 5179 | H5  | BGLC | 8 | -8.975  | 7.700-141.444 | 1.00 | 0.00 | CARM |
| ATOM | 5180 | O5  | BGLC | 8 | -9.701  | 6.277-140.099 | 1.00 | 2.00 | CARM |
| ATOM | 5181 | C2  | BGLC | 8 | -8.029  | 4.607-140.662 | 1.00 | 2.00 | CARM |
| ATOM | 5182 | H2  | BGLC | 8 | -8.804  | 3.775-140.660 | 1.00 | 0.00 | CARM |



|      |      |     |      |    |         |               |      |      |      |
|------|------|-----|------|----|---------|---------------|------|------|------|
| ATOM | 5183 | O2  | BGLC | 8  | -6.804  | 4.030-140.219 | 1.00 | 2.00 | CARM |
| ATOM | 5184 | HO2 | BGLC | 8  | -6.732  | 3.081-140.271 | 1.00 | 0.00 | CARM |
| ATOM | 5185 | C3  | BGLC | 8  | -7.881  | 5.210-142.043 | 1.00 | 2.00 | CARM |
| ATOM | 5186 | H3  | BGLC | 8  | -7.215  | 6.072-142.041 | 1.00 | 0.00 | CARM |
| ATOM | 5187 | O3  | BGLC | 8  | -7.448  | 4.187-142.919 | 1.00 | 2.00 | CARM |
| ATOM | 5188 | HO3 | BGLC | 8  | -6.569  | 3.845-142.868 | 1.00 | 0.00 | CARM |
| ATOM | 5189 | C4  | BGLC | 8  | -9.235  | 5.808-142.449 | 1.00 | 2.00 | CARM |
| ATOM | 5190 | H4  | BGLC | 8  | -10.000 | 5.041-142.523 | 1.00 | 0.00 | CARM |
| ATOM | 5191 | O4  | BGLC | 8  | -9.274  | 6.348-143.733 | 1.00 | 2.00 | CARM |
| ATOM | 5192 | C6  | BGLC | 8  | -11.145 | 7.273-141.672 | 1.00 | 2.00 | CARM |
| ATOM | 5193 | H61 | BGLC | 8  | -11.589 | 6.346-142.180 | 1.00 | 0.00 | CARM |
| ATOM | 5194 | H62 | BGLC | 8  | -11.799 | 7.436-140.821 | 1.00 | 0.00 | CARM |
| ATOM | 5195 | O6  | BGLC | 8  | -11.205 | 8.275-142.667 | 1.00 | 2.00 | CARM |
| ATOM | 5196 | HO6 | BGLC | 8  | -10.691 | 9.068-142.551 | 1.00 | 0.00 | CARM |
| ATOM | 5197 | C1  | BGLC | 9  | -9.440  | 5.832-144.869 | 1.00 | 2.00 | CARM |
| ATOM | 5198 | H1  | BGLC | 9  | -10.243 | 5.104-144.858 | 1.00 | 0.00 | CARM |
| ATOM | 5199 | C5  | BGLC | 9  | -8.271  | 4.656-146.585 | 1.00 | 2.00 | CARM |
| ATOM | 5200 | H5  | BGLC | 9  | -8.971  | 3.797-146.627 | 1.00 | 0.00 | CARM |
| ATOM | 5201 | O5  | BGLC | 9  | -8.241  | 5.222-145.288 | 1.00 | 2.00 | CARM |
| ATOM | 5202 | C2  | BGLC | 9  | -9.916  | 6.891-145.855 | 1.00 | 2.00 | CARM |
| ATOM | 5203 | H2  | BGLC | 9  | -9.141  | 7.723-145.857 | 1.00 | 0.00 | CARM |
| ATOM | 5204 | O2  | BGLC | 9  | -11.139 | 7.469-145.414 | 1.00 | 2.00 | CARM |
| ATOM | 5205 | HO2 | BGLC | 9  | -11.211 | 8.417-145.470 | 1.00 | 0.00 | CARM |
| ATOM | 5206 | C3  | BGLC | 9  | -10.064 | 6.282-147.234 | 1.00 | 2.00 | CARM |
| ATOM | 5207 | H3  | BGLC | 9  | -10.731 | 5.420-147.227 | 1.00 | 0.00 | CARM |
| ATOM | 5208 | O3  | BGLC | 9  | -10.500 | 7.302-148.114 | 1.00 | 2.00 | CARM |
| ATOM | 5209 | HO3 | BGLC | 9  | -11.379 | 7.642-148.063 | 1.00 | 0.00 | CARM |
| ATOM | 5210 | C4  | BGLC | 9  | -8.712  | 5.682-147.639 | 1.00 | 2.00 | CARM |
| ATOM | 5211 | H4  | BGLC | 9  | -7.949  | 6.451-147.716 | 1.00 | 0.00 | CARM |
| ATOM | 5212 | O4  | BGLC | 9  | -8.671  | 5.134-148.919 | 1.00 | 2.00 | CARM |
| ATOM | 5213 | C6  | BGLC | 9  | -6.800  | 4.221-146.857 | 1.00 | 2.00 | CARM |
| ATOM | 5214 | H61 | BGLC | 9  | -6.355  | 5.147-147.367 | 1.00 | 0.00 | CARM |
| ATOM | 5215 | H62 | BGLC | 9  | -6.146  | 4.061-146.006 | 1.00 | 0.00 | CARM |
| ATOM | 5216 | O6  | BGLC | 9  | -6.739  | 3.215-147.849 | 1.00 | 2.00 | CARM |
| ATOM | 5217 | HO6 | BGLC | 9  | -7.253  | 2.422-147.731 | 1.00 | 0.00 | CARM |
| ATOM | 5218 | C1  | BGLC | 10 | -8.509  | 5.648-150.059 | 1.00 | 2.00 | CARM |
| ATOM | 5219 | H1  | BGLC | 10 | -7.707  | 6.376-150.052 | 1.00 | 0.00 | CARM |
| ATOM | 5220 | C5  | BGLC | 10 | -9.679  | 6.819-151.778 | 1.00 | 2.00 | CARM |
| ATOM | 5221 | H5  | BGLC | 10 | -8.980  | 7.679-151.824 | 1.00 | 0.00 | CARM |
| ATOM | 5222 | O5  | BGLC | 10 | -9.706  | 6.256-150.479 | 1.00 | 2.00 | CARM |
| ATOM | 5223 | C2  | BGLC | 10 | -8.033  | 4.586-151.042 | 1.00 | 2.00 | CARM |
| ATOM | 5224 | H2  | BGLC | 10 | -8.808  | 3.754-151.040 | 1.00 | 0.00 | CARM |
| ATOM | 5225 | O2  | BGLC | 10 | -6.809  | 4.009-150.599 | 1.00 | 2.00 | CARM |
| ATOM | 5226 | HO2 | BGLC | 10 | -6.737  | 3.060-150.652 | 1.00 | 0.00 | CARM |
| ATOM | 5227 | C3  | BGLC | 10 | -7.886  | 5.189-152.423 | 1.00 | 2.00 | CARM |
| ATOM | 5228 | H3  | BGLC | 10 | -7.220  | 6.051-152.420 | 1.00 | 0.00 | CARM |
| ATOM | 5229 | O3  | BGLC | 10 | -7.451  | 4.166-153.299 | 1.00 | 2.00 | CARM |
| ATOM | 5230 | HO3 | BGLC | 10 | -6.572  | 3.826-153.248 | 1.00 | 0.00 | CARM |
| ATOM | 5231 | C4  | BGLC | 10 | -9.240  | 5.788-152.829 | 1.00 | 2.00 | CARM |
| ATOM | 5232 | H4  | BGLC | 10 | -10.005 | 5.021-152.903 | 1.00 | 0.00 | CARM |
| ATOM | 5233 | O4  | BGLC | 10 | -9.279  | 6.329-154.113 | 1.00 | 2.00 | CARM |
| ATOM | 5234 | C6  | BGLC | 10 | -11.149 | 7.253-152.052 | 1.00 | 2.00 | CARM |
| ATOM | 5235 | O61 | BGLC | 10 | -11.241 | 8.645-152.294 | 1.00 | 0.00 | CARM |
| ATOM | 5236 | O62 | BGLC | 10 | -11.792 | 6.370-151.995 | 1.00 | 0.00 | CARM |

|      |      |     |      |    |         |               |      |      |      |
|------|------|-----|------|----|---------|---------------|------|------|------|
| ATOM | 5237 | C1  | BGLC | 11 | -9.444  | 5.811-155.249 | 1.00 | 2.00 | CARM |
| ATOM | 5238 | H1  | BGLC | 11 | -10.246 | 5.083-155.237 | 1.00 | 0.00 | CARM |
| ATOM | 5239 | C5  | BGLC | 11 | -8.276  | 4.636-156.965 | 1.00 | 2.00 | CARM |
| ATOM | 5240 | H5  | BGLC | 11 | -8.977  | 3.778-157.008 | 1.00 | 0.00 | CARM |
| ATOM | 5241 | O5  | BGLC | 11 | -8.245  | 5.201-155.668 | 1.00 | 2.00 | CARM |
| ATOM | 5242 | C2  | BGLC | 11 | -9.920  | 6.871-156.235 | 1.00 | 2.00 | CARM |
| ATOM | 5243 | H2  | BGLC | 11 | -9.145  | 7.704-156.237 | 1.00 | 0.00 | CARM |
| ATOM | 5244 | O2  | BGLC | 11 | -11.144 | 7.449-155.794 | 1.00 | 2.00 | CARM |
| ATOM | 5245 | HO2 | BGLC | 11 | -11.216 | 8.397-155.849 | 1.00 | 0.00 | CARM |
| ATOM | 5246 | C3  | BGLC | 11 | -10.068 | 6.261-157.614 | 1.00 | 2.00 | CARM |
| ATOM | 5247 | H3  | BGLC | 11 | -10.734 | 5.399-157.607 | 1.00 | 0.00 | CARM |
| ATOM | 5248 | O3  | BGLC | 11 | -10.504 | 7.281-158.494 | 1.00 | 2.00 | CARM |
| ATOM | 5249 | HO3 | BGLC | 11 | -11.383 | 7.621-158.443 | 1.00 | 0.00 | CARM |
| ATOM | 5250 | C4  | BGLC | 11 | -8.717  | 5.662-158.019 | 1.00 | 2.00 | CARM |
| ATOM | 5251 | H4  | BGLC | 11 | -7.954  | 6.431-158.096 | 1.00 | 0.00 | CARM |
| ATOM | 5252 | O4  | BGLC | 11 | -8.675  | 5.114-159.299 | 1.00 | 2.00 | CARM |
| ATOM | 5253 | C6  | BGLC | 11 | -6.804  | 4.200-157.237 | 1.00 | 2.00 | CARM |
| ATOM | 5254 | H61 | BGLC | 11 | -6.358  | 5.125-157.747 | 1.00 | 0.00 | CARM |
| ATOM | 5255 | H62 | BGLC | 11 | -6.151  | 4.039-156.385 | 1.00 | 0.00 | CARM |
| ATOM | 5256 | O6  | BGLC | 11 | -6.744  | 3.195-158.228 | 1.00 | 2.00 | CARM |
| ATOM | 5257 | HO6 | BGLC | 11 | -7.258  | 2.403-158.110 | 1.00 | 0.00 | CARM |
| ATOM | 5258 | C1  | BGLC | 12 | -8.514  | 5.628-160.439 | 1.00 | 2.00 | CARM |
| ATOM | 5259 | H1  | BGLC | 12 | -7.712  | 6.357-160.433 | 1.00 | 0.00 | CARM |
| ATOM | 5260 | C5  | BGLC | 12 | -9.682  | 6.797-162.158 | 1.00 | 2.00 | CARM |
| ATOM | 5261 | H5  | BGLC | 12 | -8.981  | 7.656-162.204 | 1.00 | 0.00 | CARM |
| ATOM | 5262 | O5  | BGLC | 12 | -9.711  | 6.236-160.859 | 1.00 | 2.00 | CARM |
| ATOM | 5263 | C2  | BGLC | 12 | -8.038  | 4.566-161.422 | 1.00 | 2.00 | CARM |
| ATOM | 5264 | H2  | BGLC | 12 | -8.814  | 3.734-161.419 | 1.00 | 0.00 | CARM |
| ATOM | 5265 | O2  | BGLC | 12 | -6.814  | 3.989-160.979 | 1.00 | 2.00 | CARM |
| ATOM | 5266 | HO2 | BGLC | 12 | -6.742  | 3.040-161.032 | 1.00 | 0.00 | CARM |
| ATOM | 5267 | C3  | BGLC | 12 | -7.891  | 5.168-162.803 | 1.00 | 2.00 | CARM |
| ATOM | 5268 | H3  | BGLC | 12 | -7.225  | 6.030-162.800 | 1.00 | 0.00 | CARM |
| ATOM | 5269 | O3  | BGLC | 12 | -7.456  | 4.146-163.679 | 1.00 | 2.00 | CARM |
| ATOM | 5270 | HO3 | BGLC | 12 | -6.577  | 3.806-163.628 | 1.00 | 0.00 | CARM |
| ATOM | 5271 | C4  | BGLC | 12 | -9.245  | 5.766-163.209 | 1.00 | 2.00 | CARM |
| ATOM | 5272 | H4  | BGLC | 12 | -10.011 | 5.000-163.283 | 1.00 | 0.00 | CARM |
| ATOM | 5273 | O4  | BGLC | 12 | -9.284  | 6.308-164.493 | 1.00 | 2.00 | CARM |
| ATOM | 5274 | C6  | BGLC | 12 | -11.153 | 7.232-162.432 | 1.00 | 2.00 | CARM |
| ATOM | 5275 | H61 | BGLC | 12 | -11.598 | 6.305-162.939 | 1.00 | 0.00 | CARM |
| ATOM | 5276 | H62 | BGLC | 12 | -11.807 | 7.396-161.581 | 1.00 | 0.00 | CARM |
| ATOM | 5277 | O6  | BGLC | 12 | -11.213 | 8.234-163.427 | 1.00 | 2.00 | CARM |
| ATOM | 5278 | HO6 | BGLC | 12 | -10.699 | 9.027-163.311 | 1.00 | 0.00 | CARM |
| ATOM | 5279 | C1  | BGLC | 13 | -9.449  | 5.790-165.629 | 1.00 | 2.00 | CARM |
| ATOM | 5280 | H1  | BGLC | 13 | -10.251 | 5.061-165.617 | 1.00 | 0.00 | CARM |
| ATOM | 5281 | C5  | BGLC | 13 | -8.280  | 4.615-167.345 | 1.00 | 2.00 | CARM |
| ATOM | 5282 | H5  | BGLC | 13 | -8.980  | 3.756-167.387 | 1.00 | 0.00 | CARM |
| ATOM | 5283 | O5  | BGLC | 13 | -8.250  | 5.181-166.048 | 1.00 | 2.00 | CARM |
| ATOM | 5284 | C2  | BGLC | 13 | -9.924  | 6.850-166.615 | 1.00 | 2.00 | CARM |
| ATOM | 5285 | H2  | BGLC | 13 | -9.149  | 7.683-166.617 | 1.00 | 0.00 | CARM |
| ATOM | 5286 | O2  | BGLC | 13 | -11.148 | 7.428-166.174 | 1.00 | 2.00 | CARM |
| ATOM | 5287 | HO2 | BGLC | 13 | -11.220 | 8.376-166.229 | 1.00 | 0.00 | CARM |
| ATOM | 5288 | C3  | BGLC | 13 | -10.072 | 6.241-167.994 | 1.00 | 2.00 | CARM |
| ATOM | 5289 | H3  | BGLC | 13 | -10.739 | 5.380-167.986 | 1.00 | 0.00 | CARM |
| ATOM | 5290 | O3  | BGLC | 13 | -10.508 | 7.261-168.874 | 1.00 | 2.00 | CARM |

|      |      |     |      |    |         |               |      |      |      |
|------|------|-----|------|----|---------|---------------|------|------|------|
| ATOM | 5291 | HO3 | BGLC | 13 | -11.387 | 7.601-168.823 | 1.00 | 0.00 | CARM |
| ATOM | 5292 | C4  | BGLC | 13 | -8.721  | 5.640-168.399 | 1.00 | 2.00 | CARM |
| ATOM | 5293 | H4  | BGLC | 13 | -7.959  | 6.409-168.476 | 1.00 | 0.00 | CARM |
| ATOM | 5294 | O4  | BGLC | 13 | -8.679  | 5.093-169.679 | 1.00 | 2.00 | CARM |
| ATOM | 5295 | C6  | BGLC | 13 | -6.809  | 4.180-167.617 | 1.00 | 2.00 | CARM |
| ATOM | 5296 | H61 | BGLC | 13 | -6.364  | 5.105-168.128 | 1.00 | 0.00 | CARM |
| ATOM | 5297 | H62 | BGLC | 13 | -6.155  | 4.020-166.766 | 1.00 | 0.00 | CARM |
| ATOM | 5298 | O6  | BGLC | 13 | -6.749  | 3.174-168.608 | 1.00 | 2.00 | CARM |
| ATOM | 5299 | HO6 | BGLC | 13 | -7.263  | 2.381-168.489 | 1.00 | 0.00 | CARM |
| ATOM | 5300 | C1  | BGLC | 14 | -8.519  | 5.607-170.819 | 1.00 | 2.00 | CARM |
| ATOM | 5301 | H1  | BGLC | 14 | -7.717  | 6.335-170.814 | 1.00 | 0.00 | CARM |
| ATOM | 5302 | C5  | BGLC | 14 | -9.687  | 6.777-172.538 | 1.00 | 2.00 | CARM |
| ATOM | 5303 | H5  | BGLC | 14 | -8.988  | 7.637-172.584 | 1.00 | 0.00 | CARM |
| ATOM | 5304 | O5  | BGLC | 14 | -9.714  | 6.215-171.239 | 1.00 | 2.00 | CARM |
| ATOM | 5305 | C2  | BGLC | 14 | -8.042  | 4.545-171.802 | 1.00 | 2.00 | CARM |
| ATOM | 5306 | H2  | BGLC | 14 | -8.818  | 3.713-171.800 | 1.00 | 0.00 | CARM |
| ATOM | 5307 | O2  | BGLC | 14 | -6.819  | 3.968-171.359 | 1.00 | 2.00 | CARM |
| ATOM | 5308 | HO2 | BGLC | 14 | -6.747  | 3.019-171.412 | 1.00 | 0.00 | CARM |
| ATOM | 5309 | C3  | BGLC | 14 | -7.894  | 5.148-173.183 | 1.00 | 2.00 | CARM |
| ATOM | 5310 | H3  | BGLC | 14 | -7.228  | 6.010-173.182 | 1.00 | 0.00 | CARM |
| ATOM | 5311 | O3  | BGLC | 14 | -7.461  | 4.124-174.059 | 1.00 | 2.00 | CARM |
| ATOM | 5312 | HO3 | BGLC | 14 | -6.582  | 3.782-174.008 | 1.00 | 0.00 | CARM |
| ATOM | 5313 | C4  | BGLC | 14 | -9.248  | 5.745-173.589 | 1.00 | 2.00 | CARM |
| ATOM | 5314 | H4  | BGLC | 14 | -10.012 | 4.977-173.662 | 1.00 | 0.00 | CARM |
| ATOM | 5315 | O4  | BGLC | 14 | -9.289  | 6.288-174.873 | 1.00 | 2.00 | CARM |
| ATOM | 5316 | C6  | BGLC | 14 | -11.158 | 7.211-172.812 | 1.00 | 2.00 | CARM |
| ATOM | 5317 | O61 | BGLC | 14 | -11.250 | 8.603-173.055 | 1.00 | 0.00 | CARM |
| ATOM | 5318 | O62 | BGLC | 14 | -11.801 | 6.328-172.754 | 1.00 | 0.00 | CARM |
| ATOM | 5319 | C1  | BGLC | 15 | -9.454  | 5.770-176.008 | 1.00 | 2.00 | CARM |
| ATOM | 5320 | H1  | BGLC | 15 | -10.256 | 5.041-175.996 | 1.00 | 0.00 | CARM |
| ATOM | 5321 | C5  | BGLC | 15 | -8.284  | 4.594-177.725 | 1.00 | 2.00 | CARM |
| ATOM | 5322 | H5  | BGLC | 15 | -8.984  | 3.735-177.767 | 1.00 | 0.00 | CARM |
| ATOM | 5323 | O5  | BGLC | 15 | -8.254  | 5.160-176.428 | 1.00 | 2.00 | CARM |
| ATOM | 5324 | C2  | BGLC | 15 | -9.928  | 6.830-176.995 | 1.00 | 2.00 | CARM |
| ATOM | 5325 | H2  | BGLC | 15 | -9.154  | 7.663-176.998 | 1.00 | 0.00 | CARM |
| ATOM | 5326 | O2  | BGLC | 15 | -11.152 | 7.407-176.554 | 1.00 | 2.00 | CARM |
| ATOM | 5327 | HO2 | BGLC | 15 | -11.224 | 8.355-176.608 | 1.00 | 0.00 | CARM |
| ATOM | 5328 | C3  | BGLC | 15 | -10.077 | 6.220-178.374 | 1.00 | 2.00 | CARM |
| ATOM | 5329 | H3  | BGLC | 15 | -10.744 | 5.359-178.366 | 1.00 | 0.00 | CARM |
| ATOM | 5330 | O3  | BGLC | 15 | -10.513 | 7.240-179.254 | 1.00 | 2.00 | CARM |
| ATOM | 5331 | HO3 | BGLC | 15 | -11.392 | 7.581-179.203 | 1.00 | 0.00 | CARM |
| ATOM | 5332 | C4  | BGLC | 15 | -8.725  | 5.619-178.779 | 1.00 | 2.00 | CARM |
| ATOM | 5333 | H4  | BGLC | 15 | -7.962  | 6.388-178.856 | 1.00 | 0.00 | CARM |
| ATOM | 5334 | O4  | BGLC | 15 | -8.684  | 5.072-180.059 | 1.00 | 2.00 | CARM |
| ATOM | 5335 | C6  | BGLC | 15 | -6.814  | 4.159-177.997 | 1.00 | 2.00 | CARM |
| ATOM | 5336 | H61 | BGLC | 15 | -6.369  | 5.084-178.508 | 1.00 | 0.00 | CARM |
| ATOM | 5337 | H62 | BGLC | 15 | -6.160  | 4.000-177.146 | 1.00 | 0.00 | CARM |
| ATOM | 5338 | O6  | BGLC | 15 | -6.753  | 3.152-178.988 | 1.00 | 2.00 | CARM |
| ATOM | 5339 | HO6 | BGLC | 15 | -7.267  | 2.359-178.869 | 1.00 | 0.00 | CARM |
| ATOM | 5340 | C1  | BGLC | 16 | -8.523  | 5.587-181.199 | 1.00 | 2.00 | CARM |
| ATOM | 5341 | H1  | BGLC | 16 | -7.721  | 6.316-181.192 | 1.00 | 0.00 | CARM |
| ATOM | 5342 | C5  | BGLC | 16 | -9.692  | 6.756-182.918 | 1.00 | 2.00 | CARM |
| ATOM | 5343 | H5  | BGLC | 16 | -8.992  | 7.615-182.965 | 1.00 | 0.00 | CARM |
| ATOM | 5344 | O5  | BGLC | 16 | -9.719  | 6.195-181.619 | 1.00 | 2.00 | CARM |

|      |      |     |      |    |         |               |      |      |      |
|------|------|-----|------|----|---------|---------------|------|------|------|
| ATOM | 5345 | C2  | BGLC | 16 | -8.047  | 4.524-182.182 | 1.00 | 2.00 | CARM |
| ATOM | 5346 | H2  | BGLC | 16 | -8.822  | 3.692-182.181 | 1.00 | 0.00 | CARM |
| ATOM | 5347 | O2  | BGLC | 16 | -6.822  | 3.947-181.739 | 1.00 | 2.00 | CARM |
| ATOM | 5348 | HO2 | BGLC | 16 | -6.750  | 2.998-181.791 | 1.00 | 0.00 | CARM |
| ATOM | 5349 | C3  | BGLC | 16 | -7.898  | 5.128-183.563 | 1.00 | 2.00 | CARM |
| ATOM | 5350 | H3  | BGLC | 16 | -7.233  | 5.991-183.563 | 1.00 | 0.00 | CARM |
| ATOM | 5351 | O3  | BGLC | 16 | -7.466  | 4.104-184.439 | 1.00 | 2.00 | CARM |
| ATOM | 5352 | HO3 | BGLC | 16 | -6.588  | 3.761-184.388 | 1.00 | 0.00 | CARM |
| ATOM | 5353 | C4  | BGLC | 16 | -9.252  | 5.724-183.969 | 1.00 | 2.00 | CARM |
| ATOM | 5354 | H4  | BGLC | 16 | -10.016 | 4.956-184.042 | 1.00 | 0.00 | CARM |
| ATOM | 5355 | O4  | BGLC | 16 | -9.293  | 6.266-185.253 | 1.00 | 2.00 | CARM |
| ATOM | 5356 | C6  | BGLC | 16 | -11.162 | 7.190-183.192 | 1.00 | 2.00 | CARM |
| ATOM | 5357 | H61 | BGLC | 16 | -11.606 | 6.263-183.699 | 1.00 | 0.00 | CARM |
| ATOM | 5358 | H62 | BGLC | 16 | -11.816 | 7.353-182.341 | 1.00 | 0.00 | CARM |
| ATOM | 5359 | O6  | BGLC | 16 | -11.223 | 8.193-184.187 | 1.00 | 2.00 | CARM |
| ATOM | 5360 | HO6 | BGLC | 16 | -10.709 | 8.986-184.071 | 1.00 | 0.00 | CARM |
| ATOM | 5361 | C1  | BGLC | 17 | -9.458  | 5.748-186.388 | 1.00 | 2.00 | CARM |
| ATOM | 5362 | H1  | BGLC | 17 | -10.260 | 5.019-186.376 | 1.00 | 0.00 | CARM |
| ATOM | 5363 | C5  | BGLC | 17 | -8.289  | 4.574-188.105 | 1.00 | 2.00 | CARM |
| ATOM | 5364 | H5  | BGLC | 17 | -8.990  | 3.715-188.148 | 1.00 | 0.00 | CARM |
| ATOM | 5365 | O5  | BGLC | 17 | -8.259  | 5.139-186.808 | 1.00 | 2.00 | CARM |
| ATOM | 5366 | C2  | BGLC | 17 | -9.933  | 6.808-187.375 | 1.00 | 2.00 | CARM |
| ATOM | 5367 | H2  | BGLC | 17 | -9.158  | 7.640-187.377 | 1.00 | 0.00 | CARM |
| ATOM | 5368 | O2  | BGLC | 17 | -11.157 | 7.386-186.934 | 1.00 | 2.00 | CARM |
| ATOM | 5369 | HO2 | BGLC | 17 | -11.229 | 8.334-186.989 | 1.00 | 0.00 | CARM |
| ATOM | 5370 | C3  | BGLC | 17 | -10.082 | 6.200-188.754 | 1.00 | 2.00 | CARM |
| ATOM | 5371 | H3  | BGLC | 17 | -10.749 | 5.339-188.747 | 1.00 | 0.00 | CARM |
| ATOM | 5372 | O3  | BGLC | 17 | -10.517 | 7.219-189.634 | 1.00 | 2.00 | CARM |
| ATOM | 5373 | HO3 | BGLC | 17 | -11.396 | 7.560-189.583 | 1.00 | 0.00 | CARM |
| ATOM | 5374 | C4  | BGLC | 17 | -8.730  | 5.599-189.158 | 1.00 | 2.00 | CARM |
| ATOM | 5375 | H4  | BGLC | 17 | -7.967  | 6.368-189.235 | 1.00 | 0.00 | CARM |
| ATOM | 5376 | O4  | BGLC | 17 | -8.689  | 5.052-190.439 | 1.00 | 2.00 | CARM |
| ATOM | 5377 | C6  | BGLC | 17 | -6.818  | 4.139-188.377 | 1.00 | 2.00 | CARM |
| ATOM | 5378 | H61 | BGLC | 17 | -6.373  | 5.064-188.889 | 1.00 | 0.00 | CARM |
| ATOM | 5379 | H62 | BGLC | 17 | -6.164  | 3.980-187.526 | 1.00 | 0.00 | CARM |
| ATOM | 5380 | O6  | BGLC | 17 | -6.758  | 3.132-189.368 | 1.00 | 2.00 | CARM |
| ATOM | 5381 | HO6 | BGLC | 17 | -7.272  | 2.339-189.249 | 1.00 | 0.00 | CARM |
| ATOM | 5382 | C1  | BGLC | 18 | -8.527  | 5.566-191.579 | 1.00 | 2.00 | CARM |
| ATOM | 5383 | H1  | BGLC | 18 | -7.725  | 6.295-191.572 | 1.00 | 0.00 | CARM |
| ATOM | 5384 | C5  | BGLC | 18 | -9.697  | 6.737-193.298 | 1.00 | 2.00 | CARM |
| ATOM | 5385 | H5  | BGLC | 18 | -8.999  | 7.598-193.343 | 1.00 | 0.00 | CARM |
| ATOM | 5386 | O5  | BGLC | 18 | -9.724  | 6.173-191.999 | 1.00 | 2.00 | CARM |
| ATOM | 5387 | C2  | BGLC | 18 | -8.052  | 4.504-192.562 | 1.00 | 2.00 | CARM |
| ATOM | 5388 | H2  | BGLC | 18 | -8.828  | 3.672-192.561 | 1.00 | 0.00 | CARM |
| ATOM | 5389 | O2  | BGLC | 18 | -6.827  | 3.927-192.119 | 1.00 | 2.00 | CARM |
| ATOM | 5390 | HO2 | BGLC | 18 | -6.755  | 2.978-192.171 | 1.00 | 0.00 | CARM |
| ATOM | 5391 | C3  | BGLC | 18 | -7.903  | 5.107-193.943 | 1.00 | 2.00 | CARM |
| ATOM | 5392 | H3  | BGLC | 18 | -7.237  | 5.969-193.942 | 1.00 | 0.00 | CARM |
| ATOM | 5393 | O3  | BGLC | 18 | -7.471  | 4.084-194.819 | 1.00 | 2.00 | CARM |
| ATOM | 5394 | HO3 | BGLC | 18 | -6.593  | 3.742-194.768 | 1.00 | 0.00 | CARM |
| ATOM | 5395 | C4  | BGLC | 18 | -9.257  | 5.704-194.348 | 1.00 | 2.00 | CARM |
| ATOM | 5396 | H4  | BGLC | 18 | -10.021 | 4.936-194.421 | 1.00 | 0.00 | CARM |
| ATOM | 5397 | O4  | BGLC | 18 | -9.297  | 6.245-195.633 | 1.00 | 2.00 | CARM |
| ATOM | 5398 | C6  | BGLC | 18 | -11.167 | 7.169-193.572 | 1.00 | 2.00 | CARM |

|      |      |     |      |    |         |                |      |      |      |
|------|------|-----|------|----|---------|----------------|------|------|------|
| ATOM | 5399 | H61 | BGLC | 18 | -11.611 | 6.241-194.079  | 1.00 | 0.00 | CARM |
| ATOM | 5400 | H62 | BGLC | 18 | -11.821 | 7.332-192.721  | 1.00 | 0.00 | CARM |
| ATOM | 5401 | O6  | BGLC | 18 | -11.228 | 8.171-194.567  | 1.00 | 2.00 | CARM |
| ATOM | 5402 | HO6 | BGLC | 18 | -10.715 | 8.965-194.451  | 1.00 | 0.00 | CARM |
| ATOM | 5403 | C1  | BGLC | 19 | -9.462  | 5.728-196.768  | 1.00 | 2.00 | CARM |
| ATOM | 5404 | H1  | BGLC | 19 | -10.264 | 4.999-196.756  | 1.00 | 0.00 | CARM |
| ATOM | 5405 | C5  | BGLC | 19 | -8.293  | 4.552-198.485  | 1.00 | 2.00 | CARM |
| ATOM | 5406 | H5  | BGLC | 19 | -8.993  | 3.693-198.527  | 1.00 | 0.00 | CARM |
| ATOM | 5407 | O5  | BGLC | 19 | -8.264  | 5.119-197.188  | 1.00 | 2.00 | CARM |
| ATOM | 5408 | C2  | BGLC | 19 | -9.938  | 6.788-197.755  | 1.00 | 2.00 | CARM |
| ATOM | 5409 | H2  | BGLC | 19 | -9.163  | 7.621-197.757  | 1.00 | 0.00 | CARM |
| ATOM | 5410 | O2  | BGLC | 19 | -11.162 | 7.366-197.314  | 1.00 | 2.00 | CARM |
| ATOM | 5411 | HO2 | BGLC | 19 | -11.234 | 8.314-197.369  | 1.00 | 0.00 | CARM |
| ATOM | 5412 | C3  | BGLC | 19 | -10.086 | 6.179-199.134  | 1.00 | 2.00 | CARM |
| ATOM | 5413 | H3  | BGLC | 19 | -10.753 | 5.317-199.127  | 1.00 | 0.00 | CARM |
| ATOM | 5414 | O3  | BGLC | 19 | -10.522 | 7.198-200.014  | 1.00 | 2.00 | CARM |
| ATOM | 5415 | HO3 | BGLC | 19 | -11.401 | 7.538-199.963  | 1.00 | 0.00 | CARM |
| ATOM | 5416 | C4  | BGLC | 19 | -8.733  | 5.578-199.538  | 1.00 | 2.00 | CARM |
| ATOM | 5417 | H4  | BGLC | 19 | -7.969  | 6.346-199.616  | 1.00 | 0.00 | CARM |
| ATOM | 5418 | O4  | BGLC | 19 | -8.694  | 5.031-200.819  | 1.00 | 2.00 | CARM |
| ATOM | 5419 | C6  | BGLC | 19 | -6.823  | 4.117-198.757  | 1.00 | 2.00 | CARM |
| ATOM | 5420 | H61 | BGLC | 19 | -6.378  | 5.042-199.268  | 1.00 | 0.00 | CARM |
| ATOM | 5421 | H62 | BGLC | 19 | -6.169  | 3.957-197.906  | 1.00 | 0.00 | CARM |
| ATOM | 5422 | O6  | BGLC | 19 | -6.763  | 3.111-199.748  | 1.00 | 2.00 | CARM |
| ATOM | 5423 | HO6 | BGLC | 19 | -7.277  | 2.318-199.629  | 1.00 | 0.00 | CARM |
| ATOM | 5424 | C1  | BGLC | 20 | -8.532  | 5.545-201.958  | 1.00 | 2.00 | CARM |
| ATOM | 5425 | H1  | BGLC | 20 | -7.730  | 6.274-201.951  | 1.00 | 0.00 | CARM |
| ATOM | 5426 | C5  | BGLC | 20 | -9.701  | 6.715-203.678  | 1.00 | 2.00 | CARM |
| ATOM | 5427 | H5  | BGLC | 20 | -9.002  | 7.575-203.724  | 1.00 | 0.00 | CARM |
| ATOM | 5428 | O5  | BGLC | 20 | -9.728  | 6.153-202.379  | 1.00 | 2.00 | CARM |
| ATOM | 5429 | C2  | BGLC | 20 | -8.055  | 4.483-202.942  | 1.00 | 2.00 | CARM |
| ATOM | 5430 | H2  | BGLC | 20 | -8.831  | 3.651-202.940  | 1.00 | 0.00 | CARM |
| ATOM | 5431 | O2  | BGLC | 20 | -6.831  | 3.905-202.499  | 1.00 | 2.00 | CARM |
| ATOM | 5432 | HO2 | BGLC | 20 | -6.759  | 2.957-202.553  | 1.00 | 0.00 | CARM |
| ATOM | 5433 | C3  | BGLC | 20 | -7.908  | 5.086-204.323  | 1.00 | 2.00 | CARM |
| ATOM | 5434 | H3  | BGLC | 20 | -7.242  | 5.948-204.321  | 1.00 | 0.00 | CARM |
| ATOM | 5435 | O3  | BGLC | 20 | -7.474  | 4.063-205.199  | 1.00 | 2.00 | CARM |
| ATOM | 5436 | HO3 | BGLC | 20 | -6.595  | 3.722-205.148  | 1.00 | 0.00 | CARM |
| ATOM | 5437 | C4  | BGLC | 20 | -9.262  | 5.684-204.728  | 1.00 | 2.00 | CARM |
| ATOM | 5438 | H4  | BGLC | 20 | -10.089 | 5.006-204.917  | 1.00 | 0.00 | CARM |
| ATOM | 5439 | O4  | BGLC | 20 | -9.145  | 6.420-205.956  | 1.00 | 2.00 | CARM |
| ATOM | 5440 | HO4 | BGLC | 20 | -8.648  | 5.875-206.618  | 1.00 | 0.00 | CARM |
| ATOM | 5441 | C6  | BGLC | 20 | -11.172 | 7.148-203.952  | 1.00 | 2.00 | CARM |
| ATOM | 5442 | H61 | BGLC | 20 | -11.616 | 6.221-204.460  | 1.00 | 0.00 | CARM |
| ATOM | 5443 | H62 | BGLC | 20 | -11.826 | 7.310-203.101  | 1.00 | 0.00 | CARM |
| ATOM | 5444 | O6  | BGLC | 20 | -11.232 | 8.151-204.947  | 1.00 | 2.00 | CARM |
| ATOM | 5445 | HO6 | BGLC | 20 | -10.718 | 8.944-204.831  | 1.00 | 0.00 | CARM |
| ATOM | 5446 | C1  | BGLC | 1  | -3.425  | 0.320-103.340  | 1.00 | 2.00 | CARN |
| ATOM | 5447 | H1  | BGLC | 1  | -4.268  | -0.352-103.231 | 1.00 | 0.00 | CARN |
| ATOM | 5448 | O1  | BGLC | 1  | -3.103  | 1.032-102.148  | 1.00 | 2.00 | CARN |
| ATOM | 5449 | HO1 | BGLC | 1  | -2.596  | 1.770-102.409  | 1.00 | 0.00 | CARN |
| ATOM | 5450 | C5  | BGLC | 1  | -2.258  | -0.857-105.056 | 1.00 | 2.00 | CARN |
| ATOM | 5451 | H5  | BGLC | 1  | -2.957  | -1.717-105.097 | 1.00 | 0.00 | CARN |
| ATOM | 5452 | O5  | BGLC | 1  | -2.228  | -0.289-103.759 | 1.00 | 2.00 | CARN |

|      |      |     |      |   |        |                |      |      |      |
|------|------|-----|------|---|--------|----------------|------|------|------|
| ATOM | 5453 | C2  | BGLC | 1 | -3.903 | 1.379-104.327  | 1.00 | 2.00 | CARN |
| ATOM | 5454 | H2  | BGLC | 1 | -3.128 | 2.211-104.329  | 1.00 | 0.00 | CARN |
| ATOM | 5455 | O2  | BGLC | 1 | -5.126 | 1.957-103.886  | 1.00 | 2.00 | CARN |
| ATOM | 5456 | HO2 | BGLC | 1 | -5.198 | 2.905-103.942  | 1.00 | 0.00 | CARN |
| ATOM | 5457 | C3  | BGLC | 1 | -4.051 | 0.770-105.706  | 1.00 | 2.00 | CARN |
| ATOM | 5458 | H3  | BGLC | 1 | -4.718 | -0.092-105.700 | 1.00 | 0.00 | CARN |
| ATOM | 5459 | O3  | BGLC | 1 | -4.485 | 1.790-106.586  | 1.00 | 2.00 | CARN |
| ATOM | 5460 | HO3 | BGLC | 1 | -5.364 | 2.131-106.536  | 1.00 | 0.00 | CARN |
| ATOM | 5461 | C4  | BGLC | 1 | -2.698 | 0.170-106.110  | 1.00 | 2.00 | CARN |
| ATOM | 5462 | H4  | BGLC | 1 | -1.934 | 0.938-106.187  | 1.00 | 0.00 | CARN |
| ATOM | 5463 | O4  | BGLC | 1 | -2.659 | -0.375-107.392 | 1.00 | 2.00 | CARN |
| ATOM | 5464 | C6  | BGLC | 1 | -0.787 | -1.290-105.329 | 1.00 | 2.00 | CARN |
| ATOM | 5465 | H61 | BGLC | 1 | -0.343 | -0.365-105.842 | 1.00 | 0.00 | CARN |
| ATOM | 5466 | H62 | BGLC | 1 | -0.132 | -1.448-104.478 | 1.00 | 0.00 | CARN |
| ATOM | 5467 | O6  | BGLC | 1 | -0.728 | -2.297-106.320 | 1.00 | 2.00 | CARN |
| ATOM | 5468 | HO6 | BGLC | 1 | -1.241 | -3.090-106.200 | 1.00 | 0.00 | CARN |
| ATOM | 5469 | C1  | BGLC | 2 | -2.495 | 0.136-108.530  | 1.00 | 2.00 | CARN |
| ATOM | 5470 | H1  | BGLC | 2 | -1.692 | 0.863-108.523  | 1.00 | 0.00 | CARN |
| ATOM | 5471 | C5  | BGLC | 2 | -3.665 | 1.306-110.250  | 1.00 | 2.00 | CARN |
| ATOM | 5472 | H5  | BGLC | 2 | -2.965 | 2.165-110.297  | 1.00 | 0.00 | CARN |
| ATOM | 5473 | O5  | BGLC | 2 | -3.693 | 0.745-108.951  | 1.00 | 2.00 | CARN |
| ATOM | 5474 | C2  | BGLC | 2 | -2.019 | -0.925-109.513 | 1.00 | 2.00 | CARN |
| ATOM | 5475 | H2  | BGLC | 2 | -2.795 | -1.756-109.511 | 1.00 | 0.00 | CARN |
| ATOM | 5476 | O2  | BGLC | 2 | -0.796 | -1.503-109.071 | 1.00 | 2.00 | CARN |
| ATOM | 5477 | HO2 | BGLC | 2 | -0.725 | -2.452-109.125 | 1.00 | 0.00 | CARN |
| ATOM | 5478 | C3  | BGLC | 2 | -1.872 | -0.322-110.894 | 1.00 | 2.00 | CARN |
| ATOM | 5479 | H3  | BGLC | 2 | -1.206 | 0.541-110.893  | 1.00 | 0.00 | CARN |
| ATOM | 5480 | O3  | BGLC | 2 | -1.439 | -1.346-111.771 | 1.00 | 2.00 | CARN |
| ATOM | 5481 | HO3 | BGLC | 2 | -0.560 | -1.687-111.720 | 1.00 | 0.00 | CARN |
| ATOM | 5482 | C4  | BGLC | 2 | -3.227 | 0.275-111.300  | 1.00 | 2.00 | CARN |
| ATOM | 5483 | H4  | BGLC | 2 | -3.992 | -0.492-111.373 | 1.00 | 0.00 | CARN |
| ATOM | 5484 | O4  | BGLC | 2 | -3.268 | 0.818-112.584  | 1.00 | 2.00 | CARN |
| ATOM | 5485 | C6  | BGLC | 2 | -5.137 | 1.740-110.523  | 1.00 | 2.00 | CARN |
| ATOM | 5486 | H61 | BGLC | 2 | -5.582 | 0.813-111.030  | 1.00 | 0.00 | CARN |
| ATOM | 5487 | H62 | BGLC | 2 | -5.790 | 1.903-109.672  | 1.00 | 0.00 | CARN |
| ATOM | 5488 | O6  | BGLC | 2 | -5.197 | 2.742-111.518  | 1.00 | 2.00 | CARN |
| ATOM | 5489 | HO6 | BGLC | 2 | -4.683 | 3.535-111.402  | 1.00 | 0.00 | CARN |
| ATOM | 5490 | C1  | BGLC | 3 | -3.430 | 0.299-113.720  | 1.00 | 2.00 | CARN |
| ATOM | 5491 | H1  | BGLC | 3 | -4.232 | -0.430-113.709 | 1.00 | 0.00 | CARN |
| ATOM | 5492 | C5  | BGLC | 3 | -2.262 | -0.878-115.436 | 1.00 | 2.00 | CARN |
| ATOM | 5493 | H5  | BGLC | 3 | -2.961 | -1.738-115.477 | 1.00 | 0.00 | CARN |
| ATOM | 5494 | O5  | BGLC | 3 | -2.233 | -0.310-114.139 | 1.00 | 2.00 | CARN |
| ATOM | 5495 | C2  | BGLC | 3 | -3.907 | 1.358-114.707  | 1.00 | 2.00 | CARN |
| ATOM | 5496 | H2  | BGLC | 3 | -3.131 | 2.190-114.709  | 1.00 | 0.00 | CARN |
| ATOM | 5497 | O2  | BGLC | 3 | -5.129 | 1.936-114.266  | 1.00 | 2.00 | CARN |
| ATOM | 5498 | HO2 | BGLC | 3 | -5.201 | 2.884-114.322  | 1.00 | 0.00 | CARN |
| ATOM | 5499 | C3  | BGLC | 3 | -4.056 | 0.750-116.086  | 1.00 | 2.00 | CARN |
| ATOM | 5500 | H3  | BGLC | 3 | -4.723 | -0.112-116.079 | 1.00 | 0.00 | CARN |
| ATOM | 5501 | O3  | BGLC | 3 | -4.490 | 1.769-116.966  | 1.00 | 2.00 | CARN |
| ATOM | 5502 | HO3 | BGLC | 3 | -5.369 | 2.110-116.916  | 1.00 | 0.00 | CARN |
| ATOM | 5503 | C4  | BGLC | 3 | -2.703 | 0.149-116.490  | 1.00 | 2.00 | CARN |
| ATOM | 5504 | H4  | BGLC | 3 | -1.939 | 0.917-116.568  | 1.00 | 0.00 | CARN |
| ATOM | 5505 | O4  | BGLC | 3 | -2.664 | -0.397-117.772 | 1.00 | 2.00 | CARN |
| ATOM | 5506 | C6  | BGLC | 3 | -0.792 | -1.311-115.709 | 1.00 | 2.00 | CARN |

|      |      |     |      |   |        |                |      |      |      |
|------|------|-----|------|---|--------|----------------|------|------|------|
| ATOM | 5507 | H61 | BGLC | 3 | -0.348 | -0.386-116.221 | 1.00 | 0.00 | CARN |
| ATOM | 5508 | H62 | BGLC | 3 | -0.137 | -1.470-114.858 | 1.00 | 0.00 | CARN |
| ATOM | 5509 | O6  | BGLC | 3 | -0.732 | -2.317-116.700 | 1.00 | 2.00 | CARN |
| ATOM | 5510 | HO6 | BGLC | 3 | -1.245 | -3.110-116.581 | 1.00 | 0.00 | CARN |
| ATOM | 5511 | C1  | BGLC | 4 | -2.500 | 0.116-118.910  | 1.00 | 2.00 | CARN |
| ATOM | 5512 | H1  | BGLC | 4 | -1.698 | 0.845-118.902  | 1.00 | 0.00 | CARN |
| ATOM | 5513 | C5  | BGLC | 4 | -3.670 | 1.286-120.630  | 1.00 | 2.00 | CARN |
| ATOM | 5514 | H5  | BGLC | 4 | -2.971 | 2.146-120.676  | 1.00 | 0.00 | CARN |
| ATOM | 5515 | O5  | BGLC | 4 | -3.697 | 0.723-119.331  | 1.00 | 2.00 | CARN |
| ATOM | 5516 | C2  | BGLC | 4 | -2.023 | -0.945-119.893 | 1.00 | 2.00 | CARN |
| ATOM | 5517 | H2  | BGLC | 4 | -2.800 | -1.776-119.890 | 1.00 | 0.00 | CARN |
| ATOM | 5518 | O2  | BGLC | 4 | -0.801 | -1.524-119.451 | 1.00 | 2.00 | CARN |
| ATOM | 5519 | HO2 | BGLC | 4 | -0.730 | -2.473-119.505 | 1.00 | 0.00 | CARN |
| ATOM | 5520 | C3  | BGLC | 4 | -1.877 | -0.342-121.274 | 1.00 | 2.00 | CARN |
| ATOM | 5521 | H3  | BGLC | 4 | -1.211 | 0.521-121.272  | 1.00 | 0.00 | CARN |
| ATOM | 5522 | O3  | BGLC | 4 | -1.442 | -1.366-122.151 | 1.00 | 2.00 | CARN |
| ATOM | 5523 | HO3 | BGLC | 4 | -0.563 | -1.706-122.100 | 1.00 | 0.00 | CARN |
| ATOM | 5524 | C4  | BGLC | 4 | -3.231 | 0.255-121.680  | 1.00 | 2.00 | CARN |
| ATOM | 5525 | H4  | BGLC | 4 | -3.995 | -0.513-121.754 | 1.00 | 0.00 | CARN |
| ATOM | 5526 | O4  | BGLC | 4 | -3.272 | 0.798-122.964  | 1.00 | 2.00 | CARN |
| ATOM | 5527 | C6  | BGLC | 4 | -5.141 | 1.718-120.903  | 1.00 | 2.00 | CARN |
| ATOM | 5528 | H61 | BGLC | 4 | -5.585 | 0.791-121.411  | 1.00 | 0.00 | CARN |
| ATOM | 5529 | H62 | BGLC | 4 | -5.795 | 1.880-120.052  | 1.00 | 0.00 | CARN |
| ATOM | 5530 | O6  | BGLC | 4 | -5.201 | 2.721-121.898  | 1.00 | 2.00 | CARN |
| ATOM | 5531 | HO6 | BGLC | 4 | -4.687 | 3.514-121.782  | 1.00 | 0.00 | CARN |
| ATOM | 5532 | C1  | BGLC | 5 | -3.435 | 0.279-124.100  | 1.00 | 2.00 | CARN |
| ATOM | 5533 | H1  | BGLC | 5 | -4.238 | -0.449-124.089 | 1.00 | 0.00 | CARN |
| ATOM | 5534 | C5  | BGLC | 5 | -2.267 | -0.898-125.816 | 1.00 | 2.00 | CARN |
| ATOM | 5535 | H5  | BGLC | 5 | -2.966 | -1.758-125.859 | 1.00 | 0.00 | CARN |
| ATOM | 5536 | O5  | BGLC | 5 | -2.238 | -0.332-124.519 | 1.00 | 2.00 | CARN |
| ATOM | 5537 | C2  | BGLC | 5 | -3.911 | 1.337-125.087  | 1.00 | 2.00 | CARN |
| ATOM | 5538 | H2  | BGLC | 5 | -3.136 | 2.169-125.089  | 1.00 | 0.00 | CARN |
| ATOM | 5539 | O2  | BGLC | 5 | -5.135 | 1.915-124.646  | 1.00 | 2.00 | CARN |
| ATOM | 5540 | HO2 | BGLC | 5 | -5.207 | 2.863-124.702  | 1.00 | 0.00 | CARN |
| ATOM | 5541 | C3  | BGLC | 5 | -4.060 | 0.729-126.466  | 1.00 | 2.00 | CARN |
| ATOM | 5542 | H3  | BGLC | 5 | -4.727 | -0.133-126.460 | 1.00 | 0.00 | CARN |
| ATOM | 5543 | O3  | BGLC | 5 | -4.494 | 1.749-127.345  | 1.00 | 2.00 | CARN |
| ATOM | 5544 | HO3 | BGLC | 5 | -5.373 | 2.091-127.294  | 1.00 | 0.00 | CARN |
| ATOM | 5545 | C4  | BGLC | 5 | -2.708 | 0.129-126.870  | 1.00 | 2.00 | CARN |
| ATOM | 5546 | H4  | BGLC | 5 | -1.945 | 0.897-126.947  | 1.00 | 0.00 | CARN |
| ATOM | 5547 | O4  | BGLC | 5 | -2.668 | -0.418-128.152 | 1.00 | 2.00 | CARN |
| ATOM | 5548 | C6  | BGLC | 5 | -0.796 | -1.332-126.089 | 1.00 | 2.00 | CARN |
| ATOM | 5549 | H61 | BGLC | 5 | -0.352 | -0.407-126.600 | 1.00 | 0.00 | CARN |
| ATOM | 5550 | H62 | BGLC | 5 | -0.142 | -1.491-125.238 | 1.00 | 0.00 | CARN |
| ATOM | 5551 | O6  | BGLC | 5 | -0.736 | -2.338-127.080 | 1.00 | 2.00 | CARN |
| ATOM | 5552 | HO6 | BGLC | 5 | -1.249 | -3.131-126.961 | 1.00 | 0.00 | CARN |
| ATOM | 5553 | C1  | BGLC | 6 | -2.505 | 0.095-129.290  | 1.00 | 2.00 | CARN |
| ATOM | 5554 | H1  | BGLC | 6 | -1.702 | 0.823-129.283  | 1.00 | 0.00 | CARN |
| ATOM | 5555 | C5  | BGLC | 6 | -3.674 | 1.264-131.010  | 1.00 | 2.00 | CARN |
| ATOM | 5556 | H5  | BGLC | 6 | -2.974 | 2.123-131.057  | 1.00 | 0.00 | CARN |
| ATOM | 5557 | O5  | BGLC | 6 | -3.702 | 0.704-129.711  | 1.00 | 2.00 | CARN |
| ATOM | 5558 | C2  | BGLC | 6 | -2.028 | -0.967-130.273 | 1.00 | 2.00 | CARN |
| ATOM | 5559 | H2  | BGLC | 6 | -2.804 | -1.799-130.271 | 1.00 | 0.00 | CARN |
| ATOM | 5560 | O2  | BGLC | 6 | -0.805 | -1.544-129.831 | 1.00 | 2.00 | CARN |

|      |      |     |      |   |        |        |          |      |      |      |
|------|------|-----|------|---|--------|--------|----------|------|------|------|
| ATOM | 5561 | HO2 | BGLC | 6 | -0.733 | -2.493 | -129.884 | 1.00 | 0.00 | CARN |
| ATOM | 5562 | C3  | BGLC | 6 | -1.881 | -0.363 | -131.654 | 1.00 | 2.00 | CARN |
| ATOM | 5563 | H3  | BGLC | 6 | -1.215 | 0.499  | -131.653 | 1.00 | 0.00 | CARN |
| ATOM | 5564 | O3  | BGLC | 6 | -1.447 | -1.388 | -132.531 | 1.00 | 2.00 | CARN |
| ATOM | 5565 | HO3 | BGLC | 6 | -0.568 | -1.729 | -132.480 | 1.00 | 0.00 | CARN |
| ATOM | 5566 | C4  | BGLC | 6 | -3.236 | 0.235  | -132.060 | 1.00 | 2.00 | CARN |
| ATOM | 5567 | H4  | BGLC | 6 | -4.000 | -0.533 | -132.134 | 1.00 | 0.00 | CARN |
| ATOM | 5568 | O4  | BGLC | 6 | -3.277 | 0.776  | -133.344 | 1.00 | 2.00 | CARN |
| ATOM | 5569 | C6  | BGLC | 6 | -5.145 | 1.698  | -131.283 | 1.00 | 2.00 | CARN |
| ATOM | 5570 | H61 | BGLC | 6 | -5.590 | 0.771  | -131.790 | 1.00 | 0.00 | CARN |
| ATOM | 5571 | H62 | BGLC | 6 | -5.798 | 1.861  | -130.432 | 1.00 | 0.00 | CARN |
| ATOM | 5572 | O6  | BGLC | 6 | -5.206 | 2.701  | -132.278 | 1.00 | 2.00 | CARN |
| ATOM | 5573 | HO6 | BGLC | 6 | -4.692 | 3.494  | -132.162 | 1.00 | 0.00 | CARN |
| ATOM | 5574 | C1  | BGLC | 7 | -3.439 | 0.259  | -134.480 | 1.00 | 2.00 | CARN |
| ATOM | 5575 | H1  | BGLC | 7 | -4.241 | -0.469 | -134.471 | 1.00 | 0.00 | CARN |
| ATOM | 5576 | C5  | BGLC | 7 | -2.271 | -0.919 | -136.196 | 1.00 | 2.00 | CARN |
| ATOM | 5577 | H5  | BGLC | 7 | -2.970 | -1.779 | -136.237 | 1.00 | 0.00 | CARN |
| ATOM | 5578 | O5  | BGLC | 7 | -2.242 | -0.351 | -134.899 | 1.00 | 2.00 | CARN |
| ATOM | 5579 | C2  | BGLC | 7 | -3.916 | 1.317  | -135.467 | 1.00 | 2.00 | CARN |
| ATOM | 5580 | H2  | BGLC | 7 | -3.141 | 2.150  | -135.468 | 1.00 | 0.00 | CARN |
| ATOM | 5581 | O2  | BGLC | 7 | -5.139 | 1.894  | -135.026 | 1.00 | 2.00 | CARN |
| ATOM | 5582 | HO2 | BGLC | 7 | -5.212 | 2.842  | -135.082 | 1.00 | 0.00 | CARN |
| ATOM | 5583 | C3  | BGLC | 7 | -4.064 | 0.709  | -136.846 | 1.00 | 2.00 | CARN |
| ATOM | 5584 | H3  | BGLC | 7 | -4.731 | -0.152 | -136.839 | 1.00 | 0.00 | CARN |
| ATOM | 5585 | O3  | BGLC | 7 | -4.499 | 1.728  | -137.725 | 1.00 | 2.00 | CARN |
| ATOM | 5586 | HO3 | BGLC | 7 | -5.378 | 2.068  | -137.675 | 1.00 | 0.00 | CARN |
| ATOM | 5587 | C4  | BGLC | 7 | -2.712 | 0.108  | -137.250 | 1.00 | 2.00 | CARN |
| ATOM | 5588 | H4  | BGLC | 7 | -1.949 | 0.877  | -137.326 | 1.00 | 0.00 | CARN |
| ATOM | 5589 | O4  | BGLC | 7 | -2.671 | -0.438 | -138.532 | 1.00 | 2.00 | CARN |
| ATOM | 5590 | C6  | BGLC | 7 | -0.801 | -1.353 | -136.469 | 1.00 | 2.00 | CARN |
| ATOM | 5591 | H61 | BGLC | 7 | -0.357 | -0.428 | -136.980 | 1.00 | 0.00 | CARN |
| ATOM | 5592 | H62 | BGLC | 7 | -0.147 | -1.512 | -135.618 | 1.00 | 0.00 | CARN |
| ATOM | 5593 | O6  | BGLC | 7 | -0.741 | -2.359 | -137.460 | 1.00 | 2.00 | CARN |
| ATOM | 5594 | HO6 | BGLC | 7 | -1.254 | -3.152 | -137.341 | 1.00 | 0.00 | CARN |
| ATOM | 5595 | C1  | BGLC | 8 | -2.509 | 0.075  | -139.670 | 1.00 | 2.00 | CARN |
| ATOM | 5596 | H1  | BGLC | 8 | -1.707 | 0.804  | -139.663 | 1.00 | 0.00 | CARN |
| ATOM | 5597 | C5  | BGLC | 8 | -3.679 | 1.244  | -141.390 | 1.00 | 2.00 | CARN |
| ATOM | 5598 | H5  | BGLC | 8 | -2.979 | 2.103  | -141.436 | 1.00 | 0.00 | CARN |
| ATOM | 5599 | O5  | BGLC | 8 | -3.707 | 0.682  | -140.091 | 1.00 | 2.00 | CARN |
| ATOM | 5600 | C2  | BGLC | 8 | -2.032 | -0.989 | -140.653 | 1.00 | 2.00 | CARN |
| ATOM | 5601 | H2  | BGLC | 8 | -2.807 | -1.821 | -140.651 | 1.00 | 0.00 | CARN |
| ATOM | 5602 | O2  | BGLC | 8 | -0.810 | -1.566 | -140.210 | 1.00 | 2.00 | CARN |
| ATOM | 5603 | HO2 | BGLC | 8 | -0.739 | -2.515 | -140.262 | 1.00 | 0.00 | CARN |
| ATOM | 5604 | C3  | BGLC | 8 | -1.885 | -0.385 | -142.034 | 1.00 | 2.00 | CARN |
| ATOM | 5605 | H3  | BGLC | 8 | -1.218 | 0.477  | -142.031 | 1.00 | 0.00 | CARN |
| ATOM | 5606 | O3  | BGLC | 8 | -1.452 | -1.408 | -142.911 | 1.00 | 2.00 | CARN |
| ATOM | 5607 | HO3 | BGLC | 8 | -0.573 | -1.749 | -142.860 | 1.00 | 0.00 | CARN |
| ATOM | 5608 | C4  | BGLC | 8 | -3.239 | 0.214  | -142.440 | 1.00 | 2.00 | CARN |
| ATOM | 5609 | H4  | BGLC | 8 | -4.002 | -0.555 | -142.513 | 1.00 | 0.00 | CARN |
| ATOM | 5610 | O4  | BGLC | 8 | -3.282 | 0.756  | -143.724 | 1.00 | 2.00 | CARN |
| ATOM | 5611 | C6  | BGLC | 8 | -5.150 | 1.678  | -141.663 | 1.00 | 2.00 | CARN |
| ATOM | 5612 | H61 | BGLC | 8 | -5.595 | 0.750  | -142.169 | 1.00 | 0.00 | CARN |
| ATOM | 5613 | H62 | BGLC | 8 | -5.803 | 1.842  | -140.812 | 1.00 | 0.00 | CARN |
| ATOM | 5614 | O6  | BGLC | 8 | -5.211 | 2.679  | -142.658 | 1.00 | 2.00 | CARN |



|      |      |     |      |    |        |                |      |      |      |
|------|------|-----|------|----|--------|----------------|------|------|------|
| ATOM | 5615 | HO6 | BGLC | 8  | -4.697 | 3.472-142.543  | 1.00 | 0.00 | CARN |
| ATOM | 5616 | C1  | BGLC | 9  | -3.444 | 0.237-144.860  | 1.00 | 2.00 | CARN |
| ATOM | 5617 | H1  | BGLC | 9  | -4.246 | -0.492-144.849 | 1.00 | 0.00 | CARN |
| ATOM | 5618 | C5  | BGLC | 9  | -2.275 | -0.939-146.576 | 1.00 | 2.00 | CARN |
| ATOM | 5619 | H5  | BGLC | 9  | -2.975 | -1.798-146.619 | 1.00 | 0.00 | CARN |
| ATOM | 5620 | O5  | BGLC | 9  | -2.246 | -0.373-145.279 | 1.00 | 2.00 | CARN |
| ATOM | 5621 | C2  | BGLC | 9  | -3.920 | 1.297-145.847  | 1.00 | 2.00 | CARN |
| ATOM | 5622 | H2  | BGLC | 9  | -3.145 | 2.130-145.850  | 1.00 | 0.00 | CARN |
| ATOM | 5623 | O2  | BGLC | 9  | -5.143 | 1.874-145.406  | 1.00 | 2.00 | CARN |
| ATOM | 5624 | HO2 | BGLC | 9  | -5.215 | 2.822-145.461  | 1.00 | 0.00 | CARN |
| ATOM | 5625 | C3  | BGLC | 9  | -4.069 | 0.687-147.226  | 1.00 | 2.00 | CARN |
| ATOM | 5626 | H3  | BGLC | 9  | -4.735 | -0.175-147.221 | 1.00 | 0.00 | CARN |
| ATOM | 5627 | O3  | BGLC | 9  | -4.503 | 1.707-148.105  | 1.00 | 2.00 | CARN |
| ATOM | 5628 | HO3 | BGLC | 9  | -5.382 | 2.049-148.054  | 1.00 | 0.00 | CARN |
| ATOM | 5629 | C4  | BGLC | 9  | -2.716 | 0.088-147.630  | 1.00 | 2.00 | CARN |
| ATOM | 5630 | H4  | BGLC | 9  | -1.952 | 0.855-147.708  | 1.00 | 0.00 | CARN |
| ATOM | 5631 | O4  | BGLC | 9  | -2.678 | -0.459-148.912 | 1.00 | 2.00 | CARN |
| ATOM | 5632 | C6  | BGLC | 9  | -0.805 | -1.375-146.849 | 1.00 | 2.00 | CARN |
| ATOM | 5633 | H61 | BGLC | 9  | -0.360 | -0.450-147.359 | 1.00 | 0.00 | CARN |
| ATOM | 5634 | H62 | BGLC | 9  | -0.151 | -1.536-145.998 | 1.00 | 0.00 | CARN |
| ATOM | 5635 | O6  | BGLC | 9  | -0.745 | -2.380-147.840 | 1.00 | 2.00 | CARN |
| ATOM | 5636 | HO6 | BGLC | 9  | -1.259 | -3.173-147.722 | 1.00 | 0.00 | CARN |
| ATOM | 5637 | C1  | BGLC | 10 | -2.513 | 0.054-150.050  | 1.00 | 2.00 | CARN |
| ATOM | 5638 | H1  | BGLC | 10 | -1.711 | 0.783-150.041  | 1.00 | 0.00 | CARN |
| ATOM | 5639 | C5  | BGLC | 10 | -3.684 | 1.223-151.770  | 1.00 | 2.00 | CARN |
| ATOM | 5640 | H5  | BGLC | 10 | -2.984 | 2.082-151.816  | 1.00 | 0.00 | CARN |
| ATOM | 5641 | O5  | BGLC | 10 | -3.712 | 0.661-150.471  | 1.00 | 2.00 | CARN |
| ATOM | 5642 | C2  | BGLC | 10 | -2.037 | -1.009-151.033 | 1.00 | 2.00 | CARN |
| ATOM | 5643 | H2  | BGLC | 10 | -2.813 | -1.841-151.031 | 1.00 | 0.00 | CARN |
| ATOM | 5644 | O2  | BGLC | 10 | -0.814 | -1.587-150.590 | 1.00 | 2.00 | CARN |
| ATOM | 5645 | HO2 | BGLC | 10 | -0.743 | -2.536-150.643 | 1.00 | 0.00 | CARN |
| ATOM | 5646 | C3  | BGLC | 10 | -1.890 | -0.405-152.414 | 1.00 | 2.00 | CARN |
| ATOM | 5647 | H3  | BGLC | 10 | -1.224 | 0.457-152.412  | 1.00 | 0.00 | CARN |
| ATOM | 5648 | O3  | BGLC | 10 | -1.456 | -1.429-153.291 | 1.00 | 2.00 | CARN |
| ATOM | 5649 | HO3 | BGLC | 10 | -0.577 | -1.770-153.240 | 1.00 | 0.00 | CARN |
| ATOM | 5650 | C4  | BGLC | 10 | -3.243 | 0.193-152.820  | 1.00 | 2.00 | CARN |
| ATOM | 5651 | H4  | BGLC | 10 | -4.005 | -0.577-152.893 | 1.00 | 0.00 | CARN |
| ATOM | 5652 | O4  | BGLC | 10 | -3.286 | 0.735-154.104  | 1.00 | 2.00 | CARN |
| ATOM | 5653 | C6  | BGLC | 10 | -5.155 | 1.657-152.043  | 1.00 | 2.00 | CARN |
| ATOM | 5654 | H61 | BGLC | 10 | -5.600 | 0.730-152.550  | 1.00 | 0.00 | CARN |
| ATOM | 5655 | H62 | BGLC | 10 | -5.808 | 1.820-151.192  | 1.00 | 0.00 | CARN |
| ATOM | 5656 | O6  | BGLC | 10 | -5.216 | 2.659-153.038  | 1.00 | 2.00 | CARN |
| ATOM | 5657 | HO6 | BGLC | 10 | -4.702 | 3.452-152.923  | 1.00 | 0.00 | CARN |
| ATOM | 5658 | C1  | BGLC | 11 | -3.448 | 0.216-155.240  | 1.00 | 2.00 | CARN |
| ATOM | 5659 | H1  | BGLC | 11 | -4.249 | -0.513-155.229 | 1.00 | 0.00 | CARN |
| ATOM | 5660 | C5  | BGLC | 11 | -2.280 | -0.960-156.956 | 1.00 | 2.00 | CARN |
| ATOM | 5661 | H5  | BGLC | 11 | -2.980 | -1.819-156.998 | 1.00 | 0.00 | CARN |
| ATOM | 5662 | O5  | BGLC | 11 | -2.250 | -0.393-155.659 | 1.00 | 2.00 | CARN |
| ATOM | 5663 | C2  | BGLC | 11 | -3.925 | 1.275-156.227  | 1.00 | 2.00 | CARN |
| ATOM | 5664 | H2  | BGLC | 11 | -3.150 | 2.108-156.229  | 1.00 | 0.00 | CARN |
| ATOM | 5665 | O2  | BGLC | 11 | -5.148 | 1.853-155.785  | 1.00 | 2.00 | CARN |
| ATOM | 5666 | HO2 | BGLC | 11 | -5.220 | 2.801-155.841  | 1.00 | 0.00 | CARN |
| ATOM | 5667 | C3  | BGLC | 11 | -4.073 | 0.666-157.606  | 1.00 | 2.00 | CARN |
| ATOM | 5668 | H3  | BGLC | 11 | -4.740 | -0.196-157.600 | 1.00 | 0.00 | CARN |

|      |      |     |      |    |        |                |      |      |      |
|------|------|-----|------|----|--------|----------------|------|------|------|
| ATOM | 5669 | O3  | BGLC | 11 | -4.508 | 1.686-158.485  | 1.00 | 2.00 | CARN |
| ATOM | 5670 | HO3 | BGLC | 11 | -5.387 | 2.027-158.434  | 1.00 | 0.00 | CARN |
| ATOM | 5671 | C4  | BGLC | 11 | -2.721 | 0.066-158.010  | 1.00 | 2.00 | CARN |
| ATOM | 5672 | H4  | BGLC | 11 | -1.958 | 0.834-158.088  | 1.00 | 0.00 | CARN |
| ATOM | 5673 | O4  | BGLC | 11 | -2.682 | -0.480-159.292 | 1.00 | 2.00 | CARN |
| ATOM | 5674 | C6  | BGLC | 11 | -0.810 | -1.395-157.229 | 1.00 | 2.00 | CARN |
| ATOM | 5675 | H61 | BGLC | 11 | -0.366 | -0.470-157.740 | 1.00 | 0.00 | CARN |
| ATOM | 5676 | H62 | BGLC | 11 | -0.156 | -1.555-156.378 | 1.00 | 0.00 | CARN |
| ATOM | 5677 | O6  | BGLC | 11 | -0.750 | -2.401-158.220 | 1.00 | 2.00 | CARN |
| ATOM | 5678 | HO6 | BGLC | 11 | -1.264 | -3.194-158.101 | 1.00 | 0.00 | CARN |
| ATOM | 5679 | C1  | BGLC | 12 | -2.517 | 0.033-160.430  | 1.00 | 2.00 | CARN |
| ATOM | 5680 | H1  | BGLC | 12 | -1.714 | 0.761-160.421  | 1.00 | 0.00 | CARN |
| ATOM | 5681 | C5  | BGLC | 12 | -3.688 | 1.203-162.150  | 1.00 | 2.00 | CARN |
| ATOM | 5682 | H5  | BGLC | 12 | -2.989 | 2.063-162.196  | 1.00 | 0.00 | CARN |
| ATOM | 5683 | O5  | BGLC | 12 | -3.715 | 0.641-160.851  | 1.00 | 2.00 | CARN |
| ATOM | 5684 | C2  | BGLC | 12 | -2.041 | -1.029-161.413 | 1.00 | 2.00 | CARN |
| ATOM | 5685 | H2  | BGLC | 12 | -2.817 | -1.861-161.410 | 1.00 | 0.00 | CARN |
| ATOM | 5686 | O2  | BGLC | 12 | -0.818 | -1.607-160.970 | 1.00 | 2.00 | CARN |
| ATOM | 5687 | HO2 | BGLC | 12 | -0.747 | -2.556-161.023 | 1.00 | 0.00 | CARN |
| ATOM | 5688 | C3  | BGLC | 12 | -1.895 | -0.426-162.794 | 1.00 | 2.00 | CARN |
| ATOM | 5689 | H3  | BGLC | 12 | -1.229 | 0.436-162.792  | 1.00 | 0.00 | CARN |
| ATOM | 5690 | O3  | BGLC | 12 | -1.461 | -1.450-163.670 | 1.00 | 2.00 | CARN |
| ATOM | 5691 | HO3 | BGLC | 12 | -0.582 | -1.790-163.619 | 1.00 | 0.00 | CARN |
| ATOM | 5692 | C4  | BGLC | 12 | -3.248 | 0.171-163.200  | 1.00 | 2.00 | CARN |
| ATOM | 5693 | H4  | BGLC | 12 | -4.012 | -0.597-163.273 | 1.00 | 0.00 | CARN |
| ATOM | 5694 | O4  | BGLC | 12 | -3.289 | 0.714-164.484  | 1.00 | 2.00 | CARN |
| ATOM | 5695 | C6  | BGLC | 12 | -5.159 | 1.636-162.423  | 1.00 | 2.00 | CARN |
| ATOM | 5696 | H61 | BGLC | 12 | -5.604 | 0.709-162.930  | 1.00 | 0.00 | CARN |
| ATOM | 5697 | H62 | BGLC | 12 | -5.812 | 1.799-161.572  | 1.00 | 0.00 | CARN |
| ATOM | 5698 | O6  | BGLC | 12 | -5.219 | 2.638-163.418  | 1.00 | 2.00 | CARN |
| ATOM | 5699 | HO6 | BGLC | 12 | -4.705 | 3.431-163.302  | 1.00 | 0.00 | CARN |
| ATOM | 5700 | C1  | BGLC | 13 | -3.453 | 0.196-165.620  | 1.00 | 2.00 | CARN |
| ATOM | 5701 | H1  | BGLC | 13 | -4.255 | -0.532-165.609 | 1.00 | 0.00 | CARN |
| ATOM | 5702 | C5  | BGLC | 13 | -2.284 | -0.981-167.336 | 1.00 | 2.00 | CARN |
| ATOM | 5703 | H5  | BGLC | 13 | -2.983 | -1.841-167.378 | 1.00 | 0.00 | CARN |
| ATOM | 5704 | O5  | BGLC | 13 | -2.255 | -0.414-166.039 | 1.00 | 2.00 | CARN |
| ATOM | 5705 | C2  | BGLC | 13 | -3.929 | 1.254-166.607  | 1.00 | 2.00 | CARN |
| ATOM | 5706 | H2  | BGLC | 13 | -3.153 | 2.086-166.609  | 1.00 | 0.00 | CARN |
| ATOM | 5707 | O2  | BGLC | 13 | -5.152 | 1.833-166.165  | 1.00 | 2.00 | CARN |
| ATOM | 5708 | HO2 | BGLC | 13 | -5.224 | 2.781-166.221  | 1.00 | 0.00 | CARN |
| ATOM | 5709 | C3  | BGLC | 13 | -4.078 | 0.646-167.986  | 1.00 | 2.00 | CARN |
| ATOM | 5710 | H3  | BGLC | 13 | -4.745 | -0.216-167.980 | 1.00 | 0.00 | CARN |
| ATOM | 5711 | O3  | BGLC | 13 | -4.513 | 1.666-168.865  | 1.00 | 2.00 | CARN |
| ATOM | 5712 | HO3 | BGLC | 13 | -5.392 | 2.007-168.814  | 1.00 | 0.00 | CARN |
| ATOM | 5713 | C4  | BGLC | 13 | -2.726 | 0.046-168.390  | 1.00 | 2.00 | CARN |
| ATOM | 5714 | H4  | BGLC | 13 | -1.963 | 0.815-168.467  | 1.00 | 0.00 | CARN |
| ATOM | 5715 | O4  | BGLC | 13 | -2.686 | -0.501-169.672 | 1.00 | 2.00 | CARN |
| ATOM | 5716 | C6  | BGLC | 13 | -0.814 | -1.415-167.609 | 1.00 | 2.00 | CARN |
| ATOM | 5717 | H61 | BGLC | 13 | -0.370 | -0.490-168.120 | 1.00 | 0.00 | CARN |
| ATOM | 5718 | H62 | BGLC | 13 | -0.160 | -1.574-166.758 | 1.00 | 0.00 | CARN |
| ATOM | 5719 | O6  | BGLC | 13 | -0.754 | -2.421-168.600 | 1.00 | 2.00 | CARN |
| ATOM | 5720 | HO6 | BGLC | 13 | -1.267 | -3.214-168.481 | 1.00 | 0.00 | CARN |
| ATOM | 5721 | C1  | BGLC | 14 | -2.522 | 0.012-170.810  | 1.00 | 2.00 | CARN |
| ATOM | 5722 | H1  | BGLC | 14 | -1.720 | 0.740-170.802  | 1.00 | 0.00 | CARN |

|      |      |     |      |    |        |                |      |      |      |
|------|------|-----|------|----|--------|----------------|------|------|------|
| ATOM | 5723 | C5  | BGLC | 14 | -3.692 | 1.182-172.530  | 1.00 | 2.00 | CARN |
| ATOM | 5724 | H5  | BGLC | 14 | -2.992 | 2.041-172.576  | 1.00 | 0.00 | CARN |
| ATOM | 5725 | O5  | BGLC | 14 | -3.720 | 0.620-171.231  | 1.00 | 2.00 | CARN |
| ATOM | 5726 | C2  | BGLC | 14 | -2.046 | -1.050-171.793 | 1.00 | 2.00 | CARN |
| ATOM | 5727 | H2  | BGLC | 14 | -2.822 | -1.882-171.792 | 1.00 | 0.00 | CARN |
| ATOM | 5728 | O2  | BGLC | 14 | -0.823 | -1.628-171.350 | 1.00 | 2.00 | CARN |
| ATOM | 5729 | HO2 | BGLC | 14 | -0.752 | -2.577-171.403 | 1.00 | 0.00 | CARN |
| ATOM | 5730 | C3  | BGLC | 14 | -1.899 | -0.445-173.174 | 1.00 | 2.00 | CARN |
| ATOM | 5731 | H3  | BGLC | 14 | -1.234 | 0.418-173.173  | 1.00 | 0.00 | CARN |
| ATOM | 5732 | O3  | BGLC | 14 | -1.464 | -1.470-174.050 | 1.00 | 2.00 | CARN |
| ATOM | 5733 | HO3 | BGLC | 14 | -0.585 | -1.811-173.998 | 1.00 | 0.00 | CARN |
| ATOM | 5734 | C4  | BGLC | 14 | -3.253 | 0.151-173.580  | 1.00 | 2.00 | CARN |
| ATOM | 5735 | H4  | BGLC | 14 | -4.017 | -0.617-173.654 | 1.00 | 0.00 | CARN |
| ATOM | 5736 | O4  | BGLC | 14 | -3.294 | 0.694-174.864  | 1.00 | 2.00 | CARN |
| ATOM | 5737 | C6  | BGLC | 14 | -5.163 | 1.616-172.803  | 1.00 | 2.00 | CARN |
| ATOM | 5738 | H61 | BGLC | 14 | -5.608 | 0.689-173.310  | 1.00 | 0.00 | CARN |
| ATOM | 5739 | H62 | BGLC | 14 | -5.816 | 1.779-171.952  | 1.00 | 0.00 | CARN |
| ATOM | 5740 | O6  | BGLC | 14 | -5.224 | 2.618-173.798  | 1.00 | 2.00 | CARN |
| ATOM | 5741 | HO6 | BGLC | 14 | -4.710 | 3.411-173.683  | 1.00 | 0.00 | CARN |
| ATOM | 5742 | C1  | BGLC | 15 | -3.457 | 0.175-176.000  | 1.00 | 2.00 | CARN |
| ATOM | 5743 | H1  | BGLC | 15 | -4.260 | -0.553-175.989 | 1.00 | 0.00 | CARN |
| ATOM | 5744 | C5  | BGLC | 15 | -2.289 | -1.002-177.716 | 1.00 | 2.00 | CARN |
| ATOM | 5745 | H5  | BGLC | 15 | -2.988 | -1.862-177.758 | 1.00 | 0.00 | CARN |
| ATOM | 5746 | O5  | BGLC | 15 | -2.260 | -0.436-176.419 | 1.00 | 2.00 | CARN |
| ATOM | 5747 | C2  | BGLC | 15 | -3.934 | 1.234-176.987  | 1.00 | 2.00 | CARN |
| ATOM | 5748 | H2  | BGLC | 15 | -3.159 | 2.066-176.988  | 1.00 | 0.00 | CARN |
| ATOM | 5749 | O2  | BGLC | 15 | -5.157 | 1.812-176.545  | 1.00 | 2.00 | CARN |
| ATOM | 5750 | HO2 | BGLC | 15 | -5.229 | 2.760-176.601  | 1.00 | 0.00 | CARN |
| ATOM | 5751 | C3  | BGLC | 15 | -4.082 | 0.626-178.366  | 1.00 | 2.00 | CARN |
| ATOM | 5752 | H3  | BGLC | 15 | -4.749 | -0.235-178.360 | 1.00 | 0.00 | CARN |
| ATOM | 5753 | O3  | BGLC | 15 | -4.516 | 1.645-179.245  | 1.00 | 2.00 | CARN |
| ATOM | 5754 | HO3 | BGLC | 15 | -5.395 | 1.986-179.195  | 1.00 | 0.00 | CARN |
| ATOM | 5755 | C4  | BGLC | 15 | -2.729 | 0.025-178.770  | 1.00 | 2.00 | CARN |
| ATOM | 5756 | H4  | BGLC | 15 | -1.965 | 0.792-178.848  | 1.00 | 0.00 | CARN |
| ATOM | 5757 | O4  | BGLC | 15 | -2.691 | -0.521-180.052 | 1.00 | 2.00 | CARN |
| ATOM | 5758 | C6  | BGLC | 15 | -0.819 | -1.435-177.989 | 1.00 | 2.00 | CARN |
| ATOM | 5759 | H61 | BGLC | 15 | -0.376 | -0.509-178.501 | 1.00 | 0.00 | CARN |
| ATOM | 5760 | H62 | BGLC | 15 | -0.164 | -1.594-177.138 | 1.00 | 0.00 | CARN |
| ATOM | 5761 | O6  | BGLC | 15 | -0.758 | -2.442-178.980 | 1.00 | 2.00 | CARN |
| ATOM | 5762 | HO6 | BGLC | 15 | -1.271 | -3.235-178.860 | 1.00 | 0.00 | CARN |
| ATOM | 5763 | C1  | BGLC | 16 | -2.527 | -0.008-181.190 | 1.00 | 2.00 | CARN |
| ATOM | 5764 | H1  | BGLC | 16 | -1.724 | 0.720-181.182  | 1.00 | 0.00 | CARN |
| ATOM | 5765 | C5  | BGLC | 16 | -3.696 | 1.162-182.910  | 1.00 | 2.00 | CARN |
| ATOM | 5766 | H5  | BGLC | 16 | -2.997 | 2.022-182.956  | 1.00 | 0.00 | CARN |
| ATOM | 5767 | O5  | BGLC | 16 | -3.724 | 0.600-181.611  | 1.00 | 2.00 | CARN |
| ATOM | 5768 | C2  | BGLC | 16 | -2.050 | -1.071-182.173 | 1.00 | 2.00 | CARN |
| ATOM | 5769 | H2  | BGLC | 16 | -2.825 | -1.903-182.171 | 1.00 | 0.00 | CARN |
| ATOM | 5770 | O2  | BGLC | 16 | -0.827 | -1.648-181.730 | 1.00 | 2.00 | CARN |
| ATOM | 5771 | HO2 | BGLC | 16 | -0.755 | -2.597-181.783 | 1.00 | 0.00 | CARN |
| ATOM | 5772 | C3  | BGLC | 16 | -1.904 | -0.467-183.554 | 1.00 | 2.00 | CARN |
| ATOM | 5773 | H3  | BGLC | 16 | -1.238 | 0.395-183.552  | 1.00 | 0.00 | CARN |
| ATOM | 5774 | O3  | BGLC | 16 | -1.469 | -1.491-184.430 | 1.00 | 2.00 | CARN |
| ATOM | 5775 | HO3 | BGLC | 16 | -0.590 | -1.831-184.379 | 1.00 | 0.00 | CARN |
| ATOM | 5776 | C4  | BGLC | 16 | -3.258 | 0.131-183.960  | 1.00 | 2.00 | CARN |

|      |      |     |      |    |        |                |      |      |      |
|------|------|-----|------|----|--------|----------------|------|------|------|
| ATOM | 5777 | H4  | BGLC | 16 | -4.022 | -0.637-184.033 | 1.00 | 0.00 | CARN |
| ATOM | 5778 | O4  | BGLC | 16 | -3.299 | 0.673-185.244  | 1.00 | 2.00 | CARN |
| ATOM | 5779 | C6  | BGLC | 16 | -5.168 | 1.595-183.183  | 1.00 | 2.00 | CARN |
| ATOM | 5780 | H61 | BGLC | 16 | -5.613 | 0.668-183.691  | 1.00 | 0.00 | CARN |
| ATOM | 5781 | H62 | BGLC | 16 | -5.821 | 1.757-182.332  | 1.00 | 0.00 | CARN |
| ATOM | 5782 | O6  | BGLC | 16 | -5.228 | 2.598-184.178  | 1.00 | 2.00 | CARN |
| ATOM | 5783 | HO6 | BGLC | 16 | -4.714 | 3.391-184.062  | 1.00 | 0.00 | CARN |
| ATOM | 5784 | C1  | BGLC | 17 | -3.462 | 0.154-186.380  | 1.00 | 2.00 | CARN |
| ATOM | 5785 | H1  | BGLC | 17 | -4.264 | -0.575-186.369 | 1.00 | 0.00 | CARN |
| ATOM | 5786 | C5  | BGLC | 17 | -2.294 | -1.022-188.096 | 1.00 | 2.00 | CARN |
| ATOM | 5787 | H5  | BGLC | 17 | -2.994 | -1.882-188.138 | 1.00 | 0.00 | CARN |
| ATOM | 5788 | O5  | BGLC | 17 | -2.264 | -0.455-186.799 | 1.00 | 2.00 | CARN |
| ATOM | 5789 | C2  | BGLC | 17 | -3.939 | 1.213-187.367  | 1.00 | 2.00 | CARN |
| ATOM | 5790 | H2  | BGLC | 17 | -3.164 | 2.046-187.369  | 1.00 | 0.00 | CARN |
| ATOM | 5791 | O2  | BGLC | 17 | -5.162 | 1.790-186.925  | 1.00 | 2.00 | CARN |
| ATOM | 5792 | HO2 | BGLC | 17 | -5.235 | 2.738-186.981  | 1.00 | 0.00 | CARN |
| ATOM | 5793 | C3  | BGLC | 17 | -4.087 | 0.605-188.746  | 1.00 | 2.00 | CARN |
| ATOM | 5794 | H3  | BGLC | 17 | -4.754 | -0.256-188.740 | 1.00 | 0.00 | CARN |
| ATOM | 5795 | O3  | BGLC | 17 | -4.521 | 1.624-189.625  | 1.00 | 2.00 | CARN |
| ATOM | 5796 | HO3 | BGLC | 17 | -5.400 | 1.965-189.575  | 1.00 | 0.00 | CARN |
| ATOM | 5797 | C4  | BGLC | 17 | -2.734 | 0.004-189.150  | 1.00 | 2.00 | CARN |
| ATOM | 5798 | H4  | BGLC | 17 | -1.970 | 0.772-189.228  | 1.00 | 0.00 | CARN |
| ATOM | 5799 | O4  | BGLC | 17 | -2.695 | -0.542-190.432 | 1.00 | 2.00 | CARN |
| ATOM | 5800 | C6  | BGLC | 17 | -0.824 | -1.456-188.369 | 1.00 | 2.00 | CARN |
| ATOM | 5801 | H61 | BGLC | 17 | -0.380 | -0.530-188.880 | 1.00 | 0.00 | CARN |
| ATOM | 5802 | H62 | BGLC | 17 | -0.169 | -1.615-187.518 | 1.00 | 0.00 | CARN |
| ATOM | 5803 | O6  | BGLC | 17 | -0.763 | -2.463-189.360 | 1.00 | 2.00 | CARN |
| ATOM | 5804 | HO6 | BGLC | 17 | -1.276 | -3.256-189.241 | 1.00 | 0.00 | CARN |
| ATOM | 5805 | C1  | BGLC | 18 | -2.531 | -0.028-191.570 | 1.00 | 2.00 | CARN |
| ATOM | 5806 | H1  | BGLC | 18 | -1.730 | 0.702-191.561  | 1.00 | 0.00 | CARN |
| ATOM | 5807 | C5  | BGLC | 18 | -3.701 | 1.140-193.290  | 1.00 | 2.00 | CARN |
| ATOM | 5808 | H5  | BGLC | 18 | -3.001 | 1.999-193.336  | 1.00 | 0.00 | CARN |
| ATOM | 5809 | O5  | BGLC | 18 | -3.729 | 0.578-191.991  | 1.00 | 2.00 | CARN |
| ATOM | 5810 | C2  | BGLC | 18 | -2.055 | -1.092-192.553 | 1.00 | 2.00 | CARN |
| ATOM | 5811 | H2  | BGLC | 18 | -2.831 | -1.924-192.551 | 1.00 | 0.00 | CARN |
| ATOM | 5812 | O2  | BGLC | 18 | -0.832 | -1.670-192.110 | 1.00 | 2.00 | CARN |
| ATOM | 5813 | HO2 | BGLC | 18 | -0.761 | -2.619-192.162 | 1.00 | 0.00 | CARN |
| ATOM | 5814 | C3  | BGLC | 18 | -1.908 | -0.488-193.934 | 1.00 | 2.00 | CARN |
| ATOM | 5815 | H3  | BGLC | 18 | -1.242 | 0.374-193.932  | 1.00 | 0.00 | CARN |
| ATOM | 5816 | O3  | BGLC | 18 | -1.474 | -1.512-194.810 | 1.00 | 2.00 | CARN |
| ATOM | 5817 | HO3 | BGLC | 18 | -0.595 | -1.853-194.759 | 1.00 | 0.00 | CARN |
| ATOM | 5818 | C4  | BGLC | 18 | -3.261 | 0.110-194.340  | 1.00 | 2.00 | CARN |
| ATOM | 5819 | H4  | BGLC | 18 | -4.023 | -0.660-194.413 | 1.00 | 0.00 | CARN |
| ATOM | 5820 | O4  | BGLC | 18 | -3.304 | 0.651-195.624  | 1.00 | 2.00 | CARN |
| ATOM | 5821 | C6  | BGLC | 18 | -5.172 | 1.574-193.563  | 1.00 | 2.00 | CARN |
| ATOM | 5822 | H61 | BGLC | 18 | -5.617 | 0.647-194.070  | 1.00 | 0.00 | CARN |
| ATOM | 5823 | H62 | BGLC | 18 | -5.825 | 1.737-192.712  | 1.00 | 0.00 | CARN |
| ATOM | 5824 | O6  | BGLC | 18 | -5.233 | 2.576-194.558  | 1.00 | 2.00 | CARN |
| ATOM | 5825 | HO6 | BGLC | 18 | -4.719 | 3.369-194.443  | 1.00 | 0.00 | CARN |
| ATOM | 5826 | C1  | BGLC | 19 | -3.466 | 0.133-196.760  | 1.00 | 2.00 | CARN |
| ATOM | 5827 | H1  | BGLC | 19 | -4.268 | -0.596-196.750 | 1.00 | 0.00 | CARN |
| ATOM | 5828 | C5  | BGLC | 19 | -2.298 | -1.042-198.476 | 1.00 | 2.00 | CARN |
| ATOM | 5829 | H5  | BGLC | 19 | -2.999 | -1.901-198.519 | 1.00 | 0.00 | CARN |
| ATOM | 5830 | O5  | BGLC | 19 | -2.268 | -0.477-197.179 | 1.00 | 2.00 | CARN |

|      |      |     |      |    |        |                |      |      |      |
|------|------|-----|------|----|--------|----------------|------|------|------|
| ATOM | 5831 | C2  | BGLC | 19 | -3.943 | 1.192-197.747  | 1.00 | 2.00 | CARN |
| ATOM | 5832 | H2  | BGLC | 19 | -3.167 | 2.024-197.748  | 1.00 | 0.00 | CARN |
| ATOM | 5833 | O2  | BGLC | 19 | -5.166 | 1.771-197.305  | 1.00 | 2.00 | CARN |
| ATOM | 5834 | HO2 | BGLC | 19 | -5.238 | 2.719-197.361  | 1.00 | 0.00 | CARN |
| ATOM | 5835 | C3  | BGLC | 19 | -4.091 | 0.584-199.126  | 1.00 | 2.00 | CARN |
| ATOM | 5836 | H3  | BGLC | 19 | -4.758 | -0.278-199.121 | 1.00 | 0.00 | CARN |
| ATOM | 5837 | O3  | BGLC | 19 | -4.525 | 1.604-200.005  | 1.00 | 2.00 | CARN |
| ATOM | 5838 | HO3 | BGLC | 19 | -5.404 | 1.945-199.955  | 1.00 | 0.00 | CARN |
| ATOM | 5839 | C4  | BGLC | 19 | -2.738 | -0.016-199.530 | 1.00 | 2.00 | CARN |
| ATOM | 5840 | H4  | BGLC | 19 | -1.974 | 0.751-199.608  | 1.00 | 0.00 | CARN |
| ATOM | 5841 | O4  | BGLC | 19 | -2.699 | -0.564-200.812 | 1.00 | 2.00 | CARN |
| ATOM | 5842 | C6  | BGLC | 19 | -0.827 | -1.478-198.749 | 1.00 | 2.00 | CARN |
| ATOM | 5843 | H61 | BGLC | 19 | -0.382 | -0.553-199.260 | 1.00 | 0.00 | CARN |
| ATOM | 5844 | H62 | BGLC | 19 | -0.173 | -1.639-197.898 | 1.00 | 0.00 | CARN |
| ATOM | 5845 | O6  | BGLC | 19 | -0.768 | -2.483-199.740 | 1.00 | 2.00 | CARN |
| ATOM | 5846 | HO6 | BGLC | 19 | -1.282 | -3.275-199.621 | 1.00 | 0.00 | CARN |
| ATOM | 5847 | C1  | BGLC | 20 | -2.536 | -0.049-201.950 | 1.00 | 2.00 | CARN |
| ATOM | 5848 | H1  | BGLC | 20 | -1.735 | 0.680-201.941  | 1.00 | 0.00 | CARN |
| ATOM | 5849 | C5  | BGLC | 20 | -3.706 | 1.119-203.670  | 1.00 | 2.00 | CARN |
| ATOM | 5850 | H5  | BGLC | 20 | -3.005 | 1.978-203.717  | 1.00 | 0.00 | CARN |
| ATOM | 5851 | O5  | BGLC | 20 | -3.734 | 0.558-202.371  | 1.00 | 2.00 | CARN |
| ATOM | 5852 | C2  | BGLC | 20 | -2.060 | -1.112-202.933 | 1.00 | 2.00 | CARN |
| ATOM | 5853 | H2  | BGLC | 20 | -2.836 | -1.943-202.931 | 1.00 | 0.00 | CARN |
| ATOM | 5854 | O2  | BGLC | 20 | -0.837 | -1.691-202.490 | 1.00 | 2.00 | CARN |
| ATOM | 5855 | HO2 | BGLC | 20 | -0.767 | -2.640-202.543 | 1.00 | 0.00 | CARN |
| ATOM | 5856 | C3  | BGLC | 20 | -1.913 | -0.508-204.314 | 1.00 | 2.00 | CARN |
| ATOM | 5857 | H3  | BGLC | 20 | -1.247 | 0.354-204.312  | 1.00 | 0.00 | CARN |
| ATOM | 5858 | O3  | BGLC | 20 | -1.479 | -1.532-205.190 | 1.00 | 2.00 | CARN |
| ATOM | 5859 | HO3 | BGLC | 20 | -0.600 | -1.873-205.139 | 1.00 | 0.00 | CARN |
| ATOM | 5860 | C4  | BGLC | 20 | -3.266 | 0.090-204.720  | 1.00 | 2.00 | CARN |
| ATOM | 5861 | H4  | BGLC | 20 | -4.092 | -0.588-204.909 | 1.00 | 0.00 | CARN |
| ATOM | 5862 | O4  | BGLC | 20 | -3.149 | 0.824-205.947  | 1.00 | 2.00 | CARN |
| ATOM | 5863 | HO4 | BGLC | 20 | -2.652 | 0.279-206.609  | 1.00 | 0.00 | CARN |
| ATOM | 5864 | C6  | BGLC | 20 | -5.177 | 1.554-203.943  | 1.00 | 2.00 | CARN |
| ATOM | 5865 | H61 | BGLC | 20 | -5.623 | 0.627-204.449  | 1.00 | 0.00 | CARN |
| ATOM | 5866 | H62 | BGLC | 20 | -5.830 | 1.718-203.092  | 1.00 | 0.00 | CARN |
| ATOM | 5867 | O6  | BGLC | 20 | -5.237 | 2.555-204.938  | 1.00 | 2.00 | CARN |
| ATOM | 5868 | HO6 | BGLC | 20 | -4.722 | 3.348-204.823  | 1.00 | 0.00 | CARN |
| ATOM | 5869 | C1  | BGLC | 1  | 2.571  | -5.275-103.331 | 1.00 | 2.00 | CARO |
| ATOM | 5870 | H1  | BGLC | 1  | 1.727  | -5.946-103.222 | 1.00 | 0.00 | CARO |
| ATOM | 5871 | O1  | BGLC | 1  | 2.893  | -4.562-102.139 | 1.00 | 2.00 | CARO |
| ATOM | 5872 | HO1 | BGLC | 1  | 3.400  | -3.824-102.401 | 1.00 | 0.00 | CARO |
| ATOM | 5873 | C5  | BGLC | 1  | 3.739  | -6.452-105.048 | 1.00 | 2.00 | CARO |
| ATOM | 5874 | H5  | BGLC | 1  | 3.040  | -7.312-105.089 | 1.00 | 0.00 | CARO |
| ATOM | 5875 | O5  | BGLC | 1  | 3.770  | -5.885-103.751 | 1.00 | 2.00 | CARO |
| ATOM | 5876 | C2  | BGLC | 1  | 2.094  | -4.216-104.318 | 1.00 | 2.00 | CARO |
| ATOM | 5877 | H2  | BGLC | 1  | 2.869  | -3.383-104.319 | 1.00 | 0.00 | CARO |
| ATOM | 5878 | O2  | BGLC | 1  | 0.871  | -3.639-103.877 | 1.00 | 2.00 | CARO |
| ATOM | 5879 | HO2 | BGLC | 1  | 0.799  | -2.691-103.933 | 1.00 | 0.00 | CARO |
| ATOM | 5880 | C3  | BGLC | 1  | 1.946  | -4.824-105.697 | 1.00 | 2.00 | CARO |
| ATOM | 5881 | H3  | BGLC | 1  | 1.280  | -5.686-105.690 | 1.00 | 0.00 | CARO |
| ATOM | 5882 | O3  | BGLC | 1  | 1.511  | -3.805-106.577 | 1.00 | 2.00 | CARO |
| ATOM | 5883 | HO3 | BGLC | 1  | 0.632  | -3.465-106.527 | 1.00 | 0.00 | CARO |
| ATOM | 5884 | C4  | BGLC | 1  | 3.299  | -5.424-106.101 | 1.00 | 2.00 | CARO |

|      |      |     |      |   |       |                |      |      |      |
|------|------|-----|------|---|-------|----------------|------|------|------|
| ATOM | 5885 | H4  | BGLC | 1 | 4.063 | -4.657-106.178 | 1.00 | 0.00 | CARO |
| ATOM | 5886 | O4  | BGLC | 1 | 3.338 | -5.972-107.383 | 1.00 | 2.00 | CARO |
| ATOM | 5887 | C6  | BGLC | 1 | 5.211 | -6.885-105.320 | 1.00 | 2.00 | CARO |
| ATOM | 5888 | H61 | BGLC | 1 | 5.655 | -5.960-105.832 | 1.00 | 0.00 | CARO |
| ATOM | 5889 | H62 | BGLC | 1 | 5.865 | -7.043-104.469 | 1.00 | 0.00 | CARO |
| ATOM | 5890 | O6  | BGLC | 1 | 5.270 | -7.892-106.311 | 1.00 | 2.00 | CARO |
| ATOM | 5891 | HO6 | BGLC | 1 | 4.756 | -8.685-106.191 | 1.00 | 0.00 | CARO |
| ATOM | 5892 | C1  | BGLC | 2 | 3.500 | -5.457-108.521 | 1.00 | 2.00 | CARO |
| ATOM | 5893 | H1  | BGLC | 2 | 4.301 | -4.727-108.513 | 1.00 | 0.00 | CARO |
| ATOM | 5894 | C5  | BGLC | 2 | 2.332 | -4.289-110.241 | 1.00 | 2.00 | CARO |
| ATOM | 5895 | H5  | BGLC | 2 | 3.032 | -3.430-110.288 | 1.00 | 0.00 | CARO |
| ATOM | 5896 | O5  | BGLC | 2 | 2.305 | -4.851-108.942 | 1.00 | 2.00 | CARO |
| ATOM | 5897 | C2  | BGLC | 2 | 3.977 | -6.521-109.505 | 1.00 | 2.00 | CARO |
| ATOM | 5898 | H2  | BGLC | 2 | 3.202 | -7.353-109.504 | 1.00 | 0.00 | CARO |
| ATOM | 5899 | O2  | BGLC | 2 | 5.200 | -7.098-109.062 | 1.00 | 2.00 | CARO |
| ATOM | 5900 | HO2 | BGLC | 2 | 5.271 | -8.047-109.115 | 1.00 | 0.00 | CARO |
| ATOM | 5901 | C3  | BGLC | 2 | 4.125 | -5.917-110.886 | 1.00 | 2.00 | CARO |
| ATOM | 5902 | H3  | BGLC | 2 | 4.791 | -5.054-110.885 | 1.00 | 0.00 | CARO |
| ATOM | 5903 | O3  | BGLC | 2 | 4.559 | -6.941-111.762 | 1.00 | 2.00 | CARO |
| ATOM | 5904 | HO3 | BGLC | 2 | 5.438 | -7.282-111.710 | 1.00 | 0.00 | CARO |
| ATOM | 5905 | C4  | BGLC | 2 | 2.770 | -5.320-111.291 | 1.00 | 2.00 | CARO |
| ATOM | 5906 | H4  | BGLC | 2 | 2.006 | -6.088-111.364 | 1.00 | 0.00 | CARO |
| ATOM | 5907 | O4  | BGLC | 2 | 2.729 | -4.779-112.576 | 1.00 | 2.00 | CARO |
| ATOM | 5908 | C6  | BGLC | 2 | 0.861 | -3.854-110.515 | 1.00 | 2.00 | CARO |
| ATOM | 5909 | H61 | BGLC | 2 | 0.416 | -4.781-111.022 | 1.00 | 0.00 | CARO |
| ATOM | 5910 | H62 | BGLC | 2 | 0.207 | -3.690-109.664 | 1.00 | 0.00 | CARO |
| ATOM | 5911 | O6  | BGLC | 2 | 0.800 | -2.852-111.510 | 1.00 | 2.00 | CARO |
| ATOM | 5912 | HO6 | BGLC | 2 | 1.314 | -2.059-111.395 | 1.00 | 0.00 | CARO |
| ATOM | 5913 | C1  | BGLC | 3 | 2.567 | -5.296-113.711 | 1.00 | 2.00 | CARO |
| ATOM | 5914 | H1  | BGLC | 3 | 1.765 | -6.025-113.701 | 1.00 | 0.00 | CARO |
| ATOM | 5915 | C5  | BGLC | 3 | 3.736 | -6.472-115.428 | 1.00 | 2.00 | CARO |
| ATOM | 5916 | H5  | BGLC | 3 | 3.036 | -7.331-115.471 | 1.00 | 0.00 | CARO |
| ATOM | 5917 | O5  | BGLC | 3 | 3.765 | -5.906-114.131 | 1.00 | 2.00 | CARO |
| ATOM | 5918 | C2  | BGLC | 3 | 2.090 | -4.236-114.698 | 1.00 | 2.00 | CARO |
| ATOM | 5919 | H2  | BGLC | 3 | 2.865 | -3.403-114.699 | 1.00 | 0.00 | CARO |
| ATOM | 5920 | O2  | BGLC | 3 | 0.867 | -3.659-114.257 | 1.00 | 2.00 | CARO |
| ATOM | 5921 | HO2 | BGLC | 3 | 0.795 | -2.711-114.312 | 1.00 | 0.00 | CARO |
| ATOM | 5922 | C3  | BGLC | 3 | 1.942 | -4.844-116.077 | 1.00 | 2.00 | CARO |
| ATOM | 5923 | H3  | BGLC | 3 | 1.275 | -5.706-116.070 | 1.00 | 0.00 | CARO |
| ATOM | 5924 | O3  | BGLC | 3 | 1.508 | -3.825-116.957 | 1.00 | 2.00 | CARO |
| ATOM | 5925 | HO3 | BGLC | 3 | 0.629 | -3.484-116.907 | 1.00 | 0.00 | CARO |
| ATOM | 5926 | C4  | BGLC | 3 | 3.295 | -5.445-116.481 | 1.00 | 2.00 | CARO |
| ATOM | 5927 | H4  | BGLC | 3 | 4.059 | -4.678-116.559 | 1.00 | 0.00 | CARO |
| ATOM | 5928 | O4  | BGLC | 3 | 3.333 | -5.992-117.763 | 1.00 | 2.00 | CARO |
| ATOM | 5929 | C6  | BGLC | 3 | 5.206 | -6.907-115.700 | 1.00 | 2.00 | CARO |
| ATOM | 5930 | H61 | BGLC | 3 | 5.651 | -5.982-116.211 | 1.00 | 0.00 | CARO |
| ATOM | 5931 | H62 | BGLC | 3 | 5.860 | -7.067-114.849 | 1.00 | 0.00 | CARO |
| ATOM | 5932 | O6  | BGLC | 3 | 5.265 | -7.913-116.691 | 1.00 | 2.00 | CARO |
| ATOM | 5933 | HO6 | BGLC | 3 | 4.751 | -8.705-116.572 | 1.00 | 0.00 | CARO |
| ATOM | 5934 | C1  | BGLC | 4 | 3.497 | -5.479-118.901 | 1.00 | 2.00 | CARO |
| ATOM | 5935 | H1  | BGLC | 4 | 4.300 | -4.751-118.893 | 1.00 | 0.00 | CARO |
| ATOM | 5936 | C5  | BGLC | 4 | 2.329 | -4.310-120.621 | 1.00 | 2.00 | CARO |
| ATOM | 5937 | H5  | BGLC | 4 | 3.029 | -3.451-120.667 | 1.00 | 0.00 | CARO |
| ATOM | 5938 | O5  | BGLC | 4 | 2.300 | -4.871-119.322 | 1.00 | 2.00 | CARO |

|      |      |     |      |   |       |                |      |      |      |
|------|------|-----|------|---|-------|----------------|------|------|------|
| ATOM | 5939 | C2  | BGLC | 4 | 3.973 | -6.541-119.885 | 1.00 | 2.00 | CARO |
| ATOM | 5940 | H2  | BGLC | 4 | 3.197 | -7.373-119.882 | 1.00 | 0.00 | CARO |
| ATOM | 5941 | O2  | BGLC | 4 | 5.197 | -7.118-119.442 | 1.00 | 2.00 | CARO |
| ATOM | 5942 | HO2 | BGLC | 4 | 5.269 | -8.067-119.495 | 1.00 | 0.00 | CARO |
| ATOM | 5943 | C3  | BGLC | 4 | 4.120 | -5.939-121.266 | 1.00 | 2.00 | CARO |
| ATOM | 5944 | H3  | BGLC | 4 | 4.786 | -5.077-121.264 | 1.00 | 0.00 | CARO |
| ATOM | 5945 | O3  | BGLC | 4 | 4.554 | -6.963-122.142 | 1.00 | 2.00 | CARO |
| ATOM | 5946 | HO3 | BGLC | 4 | 5.433 | -7.304-122.091 | 1.00 | 0.00 | CARO |
| ATOM | 5947 | C4  | BGLC | 4 | 2.767 | -5.341-121.671 | 1.00 | 2.00 | CARO |
| ATOM | 5948 | H4  | BGLC | 4 | 2.003 | -6.109-121.743 | 1.00 | 0.00 | CARO |
| ATOM | 5949 | O4  | BGLC | 4 | 2.724 | -4.799-122.956 | 1.00 | 2.00 | CARO |
| ATOM | 5950 | C6  | BGLC | 4 | 0.857 | -3.876-120.895 | 1.00 | 2.00 | CARO |
| ATOM | 5951 | H61 | BGLC | 4 | 0.412 | -4.804-121.402 | 1.00 | 0.00 | CARO |
| ATOM | 5952 | H62 | BGLC | 4 | 0.203 | -3.713-120.044 | 1.00 | 0.00 | CARO |
| ATOM | 5953 | O6  | BGLC | 4 | 0.796 | -2.874-121.890 | 1.00 | 2.00 | CARO |
| ATOM | 5954 | HO6 | BGLC | 4 | 1.310 | -2.081-121.775 | 1.00 | 0.00 | CARO |
| ATOM | 5955 | C1  | BGLC | 5 | 2.563 | -5.317-124.091 | 1.00 | 2.00 | CARO |
| ATOM | 5956 | H1  | BGLC | 5 | 1.762 | -6.047-124.081 | 1.00 | 0.00 | CARO |
| ATOM | 5957 | C5  | BGLC | 5 | 3.731 | -6.493-125.808 | 1.00 | 2.00 | CARO |
| ATOM | 5958 | H5  | BGLC | 5 | 3.031 | -7.352-125.850 | 1.00 | 0.00 | CARO |
| ATOM | 5959 | O5  | BGLC | 5 | 3.760 | -5.926-124.511 | 1.00 | 2.00 | CARO |
| ATOM | 5960 | C2  | BGLC | 5 | 2.087 | -4.257-125.078 | 1.00 | 2.00 | CARO |
| ATOM | 5961 | H2  | BGLC | 5 | 2.862 | -3.424-125.081 | 1.00 | 0.00 | CARO |
| ATOM | 5962 | O2  | BGLC | 5 | 0.863 | -3.680-124.637 | 1.00 | 2.00 | CARO |
| ATOM | 5963 | HO2 | BGLC | 5 | 0.791 | -2.732-124.692 | 1.00 | 0.00 | CARO |
| ATOM | 5964 | C3  | BGLC | 5 | 1.937 | -4.866-126.457 | 1.00 | 2.00 | CARO |
| ATOM | 5965 | H3  | BGLC | 5 | 1.271 | -5.728-126.451 | 1.00 | 0.00 | CARO |
| ATOM | 5966 | O3  | BGLC | 5 | 1.503 | -3.847-127.337 | 1.00 | 2.00 | CARO |
| ATOM | 5967 | HO3 | BGLC | 5 | 0.624 | -3.505-127.286 | 1.00 | 0.00 | CARO |
| ATOM | 5968 | C4  | BGLC | 5 | 3.290 | -5.465-126.861 | 1.00 | 2.00 | CARO |
| ATOM | 5969 | H4  | BGLC | 5 | 4.054 | -4.698-126.939 | 1.00 | 0.00 | CARO |
| ATOM | 5970 | O4  | BGLC | 5 | 3.328 | -6.013-128.143 | 1.00 | 2.00 | CARO |
| ATOM | 5971 | C6  | BGLC | 5 | 5.201 | -6.928-126.080 | 1.00 | 2.00 | CARO |
| ATOM | 5972 | H61 | BGLC | 5 | 5.646 | -6.002-126.590 | 1.00 | 0.00 | CARO |
| ATOM | 5973 | H62 | BGLC | 5 | 5.855 | -7.088-125.229 | 1.00 | 0.00 | CARO |
| ATOM | 5974 | O6  | BGLC | 5 | 5.262 | -7.933-127.071 | 1.00 | 2.00 | CARO |
| ATOM | 5975 | HO6 | BGLC | 5 | 4.748 | -8.726-126.953 | 1.00 | 0.00 | CARO |
| ATOM | 5976 | C1  | BGLC | 6 | 3.492 | -5.500-129.281 | 1.00 | 2.00 | CARO |
| ATOM | 5977 | H1  | BGLC | 6 | 4.295 | -4.772-129.273 | 1.00 | 0.00 | CARO |
| ATOM | 5978 | C5  | BGLC | 6 | 2.324 | -4.330-131.001 | 1.00 | 2.00 | CARO |
| ATOM | 5979 | H5  | BGLC | 6 | 3.024 | -3.471-131.046 | 1.00 | 0.00 | CARO |
| ATOM | 5980 | O5  | BGLC | 6 | 2.295 | -4.892-129.702 | 1.00 | 2.00 | CARO |
| ATOM | 5981 | C2  | BGLC | 6 | 3.968 | -6.562-130.265 | 1.00 | 2.00 | CARO |
| ATOM | 5982 | H2  | BGLC | 6 | 3.192 | -7.394-130.263 | 1.00 | 0.00 | CARO |
| ATOM | 5983 | O2  | BGLC | 6 | 5.192 | -7.140-129.822 | 1.00 | 2.00 | CARO |
| ATOM | 5984 | HO2 | BGLC | 6 | 5.263 | -8.089-129.875 | 1.00 | 0.00 | CARO |
| ATOM | 5985 | C3  | BGLC | 6 | 4.115 | -5.959-131.646 | 1.00 | 2.00 | CARO |
| ATOM | 5986 | H3  | BGLC | 6 | 4.781 | -5.097-131.644 | 1.00 | 0.00 | CARO |
| ATOM | 5987 | O3  | BGLC | 6 | 4.550 | -6.983-132.522 | 1.00 | 2.00 | CARO |
| ATOM | 5988 | HO3 | BGLC | 6 | 5.429 | -7.323-132.471 | 1.00 | 0.00 | CARO |
| ATOM | 5989 | C4  | BGLC | 6 | 2.762 | -5.361-132.051 | 1.00 | 2.00 | CARO |
| ATOM | 5990 | H4  | BGLC | 6 | 1.998 | -6.129-132.124 | 1.00 | 0.00 | CARO |
| ATOM | 5991 | O4  | BGLC | 6 | 2.721 | -4.820-133.335 | 1.00 | 2.00 | CARO |
| ATOM | 5992 | C6  | BGLC | 6 | 0.853 | -3.896-131.275 | 1.00 | 2.00 | CARO |

|      |      |          |   |       |                |      |      |      |
|------|------|----------|---|-------|----------------|------|------|------|
| ATOM | 5993 | H61 BGLC | 6 | 0.409 | -4.824-131.782 | 1.00 | 0.00 | CARO |
| ATOM | 5994 | H62 BGLC | 6 | 0.199 | -3.733-130.424 | 1.00 | 0.00 | CARO |
| ATOM | 5995 | O6 BGLC  | 6 | 0.791 | -2.894-132.270 | 1.00 | 2.00 | CARO |
| ATOM | 5996 | HO6 BGLC | 6 | 1.304 | -2.100-132.155 | 1.00 | 0.00 | CARO |
| ATOM | 5997 | C1 BGLC  | 7 | 2.558 | -5.337-134.471 | 1.00 | 2.00 | CARO |
| ATOM | 5998 | H1 BGLC  | 7 | 1.756 | -6.066-134.461 | 1.00 | 0.00 | CARO |
| ATOM | 5999 | C5 BGLC  | 7 | 3.727 | -6.513-136.188 | 1.00 | 2.00 | CARO |
| ATOM | 6000 | H5 BGLC  | 7 | 3.028 | -7.373-136.231 | 1.00 | 0.00 | CARO |
| ATOM | 6001 | O5 BGLC  | 7 | 3.755 | -5.946-134.891 | 1.00 | 2.00 | CARO |
| ATOM | 6002 | C2 BGLC  | 7 | 2.082 | -4.278-135.458 | 1.00 | 2.00 | CARO |
| ATOM | 6003 | H2 BGLC  | 7 | 2.857 | -3.446-135.460 | 1.00 | 0.00 | CARO |
| ATOM | 6004 | O2 BGLC  | 7 | 0.859 | -3.700-135.017 | 1.00 | 2.00 | CARO |
| ATOM | 6005 | HO2 BGLC | 7 | 0.787 | -2.752-135.073 | 1.00 | 0.00 | CARO |
| ATOM | 6006 | C3 BGLC  | 7 | 1.933 | -4.887-136.837 | 1.00 | 2.00 | CARO |
| ATOM | 6007 | H3 BGLC  | 7 | 1.267 | -5.749-136.830 | 1.00 | 0.00 | CARO |
| ATOM | 6008 | O3 BGLC  | 7 | 1.498 | -3.868-137.717 | 1.00 | 2.00 | CARO |
| ATOM | 6009 | HO3 BGLC | 7 | 0.619 | -3.527-137.666 | 1.00 | 0.00 | CARO |
| ATOM | 6010 | C4 BGLC  | 7 | 3.287 | -5.487-137.241 | 1.00 | 2.00 | CARO |
| ATOM | 6011 | H4 BGLC  | 7 | 4.051 | -4.719-137.319 | 1.00 | 0.00 | CARO |
| ATOM | 6012 | O4 BGLC  | 7 | 3.326 | -6.034-138.523 | 1.00 | 2.00 | CARO |
| ATOM | 6013 | C6 BGLC  | 7 | 5.197 | -6.947-136.460 | 1.00 | 2.00 | CARO |
| ATOM | 6014 | H61 BGLC | 7 | 5.641 | -6.022-136.972 | 1.00 | 0.00 | CARO |
| ATOM | 6015 | H62 BGLC | 7 | 5.851 | -7.106-135.609 | 1.00 | 0.00 | CARO |
| ATOM | 6016 | O6 BGLC  | 7 | 5.257 | -7.954-137.451 | 1.00 | 2.00 | CARO |
| ATOM | 6017 | HO6 BGLC | 7 | 4.743 | -8.747-137.332 | 1.00 | 0.00 | CARO |
| ATOM | 6018 | C1 BGLC  | 8 | 3.487 | -5.520-139.661 | 1.00 | 2.00 | CARO |
| ATOM | 6019 | H1 BGLC  | 8 | 4.289 | -4.791-139.654 | 1.00 | 0.00 | CARO |
| ATOM | 6020 | C5 BGLC  | 8 | 2.319 | -4.351-141.381 | 1.00 | 2.00 | CARO |
| ATOM | 6021 | H5 BGLC  | 8 | 3.019 | -3.492-141.427 | 1.00 | 0.00 | CARO |
| ATOM | 6022 | O5 BGLC  | 8 | 2.290 | -4.912-140.082 | 1.00 | 2.00 | CARO |
| ATOM | 6023 | C2 BGLC  | 8 | 3.964 | -6.583-140.645 | 1.00 | 2.00 | CARO |
| ATOM | 6024 | H2 BGLC  | 8 | 3.189 | -7.415-140.643 | 1.00 | 0.00 | CARO |
| ATOM | 6025 | O2 BGLC  | 8 | 5.187 | -7.160-140.202 | 1.00 | 2.00 | CARO |
| ATOM | 6026 | HO2 BGLC | 8 | 5.259 | -8.109-140.255 | 1.00 | 0.00 | CARO |
| ATOM | 6027 | C3 BGLC  | 8 | 4.111 | -5.979-142.026 | 1.00 | 2.00 | CARO |
| ATOM | 6028 | H3 BGLC  | 8 | 4.777 | -5.117-142.025 | 1.00 | 0.00 | CARO |
| ATOM | 6029 | O3 BGLC  | 8 | 4.545 | -7.004-142.902 | 1.00 | 2.00 | CARO |
| ATOM | 6030 | HO3 BGLC | 8 | 5.424 | -7.345-142.851 | 1.00 | 0.00 | CARO |
| ATOM | 6031 | C4 BGLC  | 8 | 2.758 | -5.382-142.431 | 1.00 | 2.00 | CARO |
| ATOM | 6032 | H4 BGLC  | 8 | 1.994 | -6.150-142.504 | 1.00 | 0.00 | CARO |
| ATOM | 6033 | O4 BGLC  | 8 | 2.716 | -4.840-143.715 | 1.00 | 2.00 | CARO |
| ATOM | 6034 | C6 BGLC  | 8 | 0.848 | -3.917-141.655 | 1.00 | 2.00 | CARO |
| ATOM | 6035 | H61 BGLC | 8 | 0.404 | -4.845-142.162 | 1.00 | 0.00 | CARO |
| ATOM | 6036 | H62 BGLC | 8 | 0.194 | -3.754-140.804 | 1.00 | 0.00 | CARO |
| ATOM | 6037 | O6 BGLC  | 8 | 0.786 | -2.915-142.649 | 1.00 | 2.00 | CARO |
| ATOM | 6038 | HO6 BGLC | 8 | 1.299 | -2.121-142.533 | 1.00 | 0.00 | CARO |
| ATOM | 6039 | C1 BGLC  | 9 | 2.553 | -5.358-144.851 | 1.00 | 2.00 | CARO |
| ATOM | 6040 | H1 BGLC  | 9 | 1.751 | -6.087-144.840 | 1.00 | 0.00 | CARO |
| ATOM | 6041 | C5 BGLC  | 9 | 3.722 | -6.534-146.568 | 1.00 | 2.00 | CARO |
| ATOM | 6042 | H5 BGLC  | 9 | 3.022 | -7.393-146.610 | 1.00 | 0.00 | CARO |
| ATOM | 6043 | O5 BGLC  | 9 | 3.751 | -5.967-145.271 | 1.00 | 2.00 | CARO |
| ATOM | 6044 | C2 BGLC  | 9 | 2.077 | -4.299-145.838 | 1.00 | 2.00 | CARO |
| ATOM | 6045 | H2 BGLC  | 9 | 2.853 | -3.467-145.840 | 1.00 | 0.00 | CARO |
| ATOM | 6046 | O2 BGLC  | 9 | 0.854 | -3.721-145.397 | 1.00 | 2.00 | CARO |



|      |      |          |    |       |                |      |      |      |
|------|------|----------|----|-------|----------------|------|------|------|
| ATOM | 6047 | HO2 BGLC | 9  | 0.782 | -2.773-145.453 | 1.00 | 0.00 | CARO |
| ATOM | 6048 | C3 BGLC  | 9  | 1.928 | -4.907-147.217 | 1.00 | 2.00 | CARO |
| ATOM | 6049 | H3 BGLC  | 9  | 1.261 | -5.769-147.210 | 1.00 | 0.00 | CARO |
| ATOM | 6050 | O3 BGLC  | 9  | 1.494 | -3.888-148.097 | 1.00 | 2.00 | CARO |
| ATOM | 6051 | HO3 BGLC | 9  | 0.615 | -3.547-148.047 | 1.00 | 0.00 | CARO |
| ATOM | 6052 | C4 BGLC  | 9  | 3.282 | -5.508-147.621 | 1.00 | 2.00 | CARO |
| ATOM | 6053 | H4 BGLC  | 9  | 4.046 | -4.741-147.699 | 1.00 | 0.00 | CARO |
| ATOM | 6054 | O4 BGLC  | 9  | 3.320 | -6.055-148.903 | 1.00 | 2.00 | CARO |
| ATOM | 6055 | C6 BGLC  | 9  | 5.192 | -6.969-146.840 | 1.00 | 2.00 | CARO |
| ATOM | 6056 | H61 BGLC | 9  | 5.637 | -6.044-147.350 | 1.00 | 0.00 | CARO |
| ATOM | 6057 | H62 BGLC | 9  | 5.846 | -7.129-145.989 | 1.00 | 0.00 | CARO |
| ATOM | 6058 | O6 BGLC  | 9  | 5.252 | -7.974-147.831 | 1.00 | 2.00 | CARO |
| ATOM | 6059 | HO6 BGLC | 9  | 4.738 | -8.767-147.713 | 1.00 | 0.00 | CARO |
| ATOM | 6060 | C1 BGLC  | 10 | 3.483 | -5.541-150.041 | 1.00 | 2.00 | CARO |
| ATOM | 6061 | H1 BGLC  | 10 | 4.285 | -4.812-150.033 | 1.00 | 0.00 | CARO |
| ATOM | 6062 | C5 BGLC  | 10 | 2.314 | -4.371-151.761 | 1.00 | 2.00 | CARO |
| ATOM | 6063 | H5 BGLC  | 10 | 3.014 | -3.512-151.807 | 1.00 | 0.00 | CARO |
| ATOM | 6064 | O5 BGLC  | 10 | 2.286 | -4.933-150.462 | 1.00 | 2.00 | CARO |
| ATOM | 6065 | C2 BGLC  | 10 | 3.959 | -6.604-151.024 | 1.00 | 2.00 | CARO |
| ATOM | 6066 | H2 BGLC  | 10 | 3.183 | -7.436-151.022 | 1.00 | 0.00 | CARO |
| ATOM | 6067 | O2 BGLC  | 10 | 5.183 | -7.181-150.582 | 1.00 | 2.00 | CARO |
| ATOM | 6068 | HO2 BGLC | 10 | 5.255 | -8.130-150.635 | 1.00 | 0.00 | CARO |
| ATOM | 6069 | C3 BGLC  | 10 | 4.107 | -6.001-152.406 | 1.00 | 2.00 | CARO |
| ATOM | 6070 | H3 BGLC  | 10 | 4.773 | -5.139-152.404 | 1.00 | 0.00 | CARO |
| ATOM | 6071 | O3 BGLC  | 10 | 4.541 | -7.024-153.282 | 1.00 | 2.00 | CARO |
| ATOM | 6072 | HO3 BGLC | 10 | 5.420 | -7.365-153.231 | 1.00 | 0.00 | CARO |
| ATOM | 6073 | C4 BGLC  | 10 | 2.753 | -5.403-152.811 | 1.00 | 2.00 | CARO |
| ATOM | 6074 | H4 BGLC  | 10 | 1.989 | -6.171-152.884 | 1.00 | 0.00 | CARO |
| ATOM | 6075 | O4 BGLC  | 10 | 2.712 | -4.861-154.095 | 1.00 | 2.00 | CARO |
| ATOM | 6076 | C6 BGLC  | 10 | 0.843 | -3.937-152.034 | 1.00 | 2.00 | CARO |
| ATOM | 6077 | H61 BGLC | 10 | 0.398 | -4.865-152.540 | 1.00 | 0.00 | CARO |
| ATOM | 6078 | H62 BGLC | 10 | 0.190 | -3.773-151.183 | 1.00 | 0.00 | CARO |
| ATOM | 6079 | O6 BGLC  | 10 | 0.782 | -2.936-153.029 | 1.00 | 2.00 | CARO |
| ATOM | 6080 | HO6 BGLC | 10 | 1.296 | -2.143-152.914 | 1.00 | 0.00 | CARO |
| ATOM | 6081 | C1 BGLC  | 11 | 2.548 | -5.378-155.231 | 1.00 | 2.00 | CARO |
| ATOM | 6082 | H1 BGLC  | 11 | 1.746 | -6.106-155.220 | 1.00 | 0.00 | CARO |
| ATOM | 6083 | C5 BGLC  | 11 | 3.717 | -6.556-156.948 | 1.00 | 2.00 | CARO |
| ATOM | 6084 | H5 BGLC  | 11 | 3.018 | -7.416-156.989 | 1.00 | 0.00 | CARO |
| ATOM | 6085 | O5 BGLC  | 11 | 3.747 | -5.988-155.651 | 1.00 | 2.00 | CARO |
| ATOM | 6086 | C2 BGLC  | 11 | 2.073 | -4.320-156.218 | 1.00 | 2.00 | CARO |
| ATOM | 6087 | H2 BGLC  | 11 | 2.848 | -3.487-156.220 | 1.00 | 0.00 | CARO |
| ATOM | 6088 | O2 BGLC  | 11 | 0.849 | -3.743-155.777 | 1.00 | 2.00 | CARO |
| ATOM | 6089 | HO2 BGLC | 11 | 0.776 | -2.795-155.833 | 1.00 | 0.00 | CARO |
| ATOM | 6090 | C3 BGLC  | 11 | 1.924 | -4.928-157.597 | 1.00 | 2.00 | CARO |
| ATOM | 6091 | H3 BGLC  | 11 | 1.258 | -5.790-157.590 | 1.00 | 0.00 | CARO |
| ATOM | 6092 | O3 BGLC  | 11 | 1.489 | -3.909-158.477 | 1.00 | 2.00 | CARO |
| ATOM | 6093 | HO3 BGLC | 11 | 0.610 | -3.568-158.426 | 1.00 | 0.00 | CARO |
| ATOM | 6094 | C4 BGLC  | 11 | 3.277 | -5.528-158.001 | 1.00 | 2.00 | CARO |
| ATOM | 6095 | H4 BGLC  | 11 | 4.041 | -4.761-158.078 | 1.00 | 0.00 | CARO |
| ATOM | 6096 | O4 BGLC  | 11 | 3.316 | -6.075-159.283 | 1.00 | 2.00 | CARO |
| ATOM | 6097 | C6 BGLC  | 11 | 5.189 | -6.989-157.220 | 1.00 | 2.00 | CARO |
| ATOM | 6098 | H61 BGLC | 11 | 5.634 | -6.065-157.732 | 1.00 | 0.00 | CARO |
| ATOM | 6099 | H62 BGLC | 11 | 5.843 | -7.148-156.368 | 1.00 | 0.00 | CARO |
| ATOM | 6100 | O6 BGLC  | 11 | 5.247 | -7.995-158.211 | 1.00 | 2.00 | CARO |

|      |      |     |      |    |       |                |      |      |      |
|------|------|-----|------|----|-------|----------------|------|------|------|
| ATOM | 6101 | HO6 | BGLC | 11 | 4.733 | -8.787-158.091 | 1.00 | 0.00 | CARO |
| ATOM | 6102 | C1  | BGLC | 12 | 3.478 | -5.561-160.421 | 1.00 | 2.00 | CARO |
| ATOM | 6103 | H1  | BGLC | 12 | 4.280 | -4.832-160.414 | 1.00 | 0.00 | CARO |
| ATOM | 6104 | C5  | BGLC | 12 | 2.310 | -4.393-162.141 | 1.00 | 2.00 | CARO |
| ATOM | 6105 | H5  | BGLC | 12 | 3.010 | -3.534-162.188 | 1.00 | 0.00 | CARO |
| ATOM | 6106 | O5  | BGLC | 12 | 2.283 | -4.954-160.842 | 1.00 | 2.00 | CARO |
| ATOM | 6107 | C2  | BGLC | 12 | 3.955 | -6.625-161.404 | 1.00 | 2.00 | CARO |
| ATOM | 6108 | H2  | BGLC | 12 | 3.179 | -7.457-161.402 | 1.00 | 0.00 | CARO |
| ATOM | 6109 | O2  | BGLC | 12 | 5.178 | -7.202-160.962 | 1.00 | 2.00 | CARO |
| ATOM | 6110 | HO2 | BGLC | 12 | 5.249 | -8.151-161.015 | 1.00 | 0.00 | CARO |
| ATOM | 6111 | C3  | BGLC | 12 | 4.103 | -6.021-162.786 | 1.00 | 2.00 | CARO |
| ATOM | 6112 | H3  | BGLC | 12 | 4.769 | -5.159-162.786 | 1.00 | 0.00 | CARO |
| ATOM | 6113 | O3  | BGLC | 12 | 4.536 | -7.045-163.662 | 1.00 | 2.00 | CARO |
| ATOM | 6114 | HO3 | BGLC | 12 | 5.415 | -7.387-163.611 | 1.00 | 0.00 | CARO |
| ATOM | 6115 | C4  | BGLC | 12 | 2.748 | -5.424-163.191 | 1.00 | 2.00 | CARO |
| ATOM | 6116 | H4  | BGLC | 12 | 1.983 | -6.191-163.265 | 1.00 | 0.00 | CARO |
| ATOM | 6117 | O4  | BGLC | 12 | 2.708 | -4.883-164.475 | 1.00 | 2.00 | CARO |
| ATOM | 6118 | C6  | BGLC | 12 | 0.839 | -3.958-162.414 | 1.00 | 2.00 | CARO |
| ATOM | 6119 | H61 | BGLC | 12 | 0.393 | -4.885-162.921 | 1.00 | 0.00 | CARO |
| ATOM | 6120 | H62 | BGLC | 12 | 0.186 | -3.794-161.563 | 1.00 | 0.00 | CARO |
| ATOM | 6121 | O6  | BGLC | 12 | 0.779 | -2.956-163.409 | 1.00 | 2.00 | CARO |
| ATOM | 6122 | HO6 | BGLC | 12 | 1.294 | -2.163-163.294 | 1.00 | 0.00 | CARO |
| ATOM | 6123 | C1  | BGLC | 13 | 2.545 | -5.399-165.611 | 1.00 | 2.00 | CARO |
| ATOM | 6124 | H1  | BGLC | 13 | 1.742 | -6.127-165.602 | 1.00 | 0.00 | CARO |
| ATOM | 6125 | C5  | BGLC | 13 | 3.714 | -6.576-167.327 | 1.00 | 2.00 | CARO |
| ATOM | 6126 | H5  | BGLC | 13 | 3.015 | -7.436-167.369 | 1.00 | 0.00 | CARO |
| ATOM | 6127 | O5  | BGLC | 13 | 3.742 | -6.009-166.031 | 1.00 | 2.00 | CARO |
| ATOM | 6128 | C2  | BGLC | 13 | 2.068 | -4.340-166.598 | 1.00 | 2.00 | CARO |
| ATOM | 6129 | H2  | BGLC | 13 | 2.843 | -3.507-166.600 | 1.00 | 0.00 | CARO |
| ATOM | 6130 | O2  | BGLC | 13 | 0.844 | -3.763-166.157 | 1.00 | 2.00 | CARO |
| ATOM | 6131 | HO2 | BGLC | 13 | 0.771 | -2.815-166.213 | 1.00 | 0.00 | CARO |
| ATOM | 6132 | C3  | BGLC | 13 | 1.920 | -4.949-167.977 | 1.00 | 2.00 | CARO |
| ATOM | 6133 | H3  | BGLC | 13 | 1.253 | -5.811-167.971 | 1.00 | 0.00 | CARO |
| ATOM | 6134 | O3  | BGLC | 13 | 1.486 | -3.929-168.857 | 1.00 | 2.00 | CARO |
| ATOM | 6135 | HO3 | BGLC | 13 | 0.607 | -3.588-168.807 | 1.00 | 0.00 | CARO |
| ATOM | 6136 | C4  | BGLC | 13 | 3.272 | -5.549-168.381 | 1.00 | 2.00 | CARO |
| ATOM | 6137 | H4  | BGLC | 13 | 4.035 | -4.781-168.459 | 1.00 | 0.00 | CARO |
| ATOM | 6138 | O4  | BGLC | 13 | 3.311 | -6.096-169.663 | 1.00 | 2.00 | CARO |
| ATOM | 6139 | C6  | BGLC | 13 | 5.184 | -7.010-167.600 | 1.00 | 2.00 | CARO |
| ATOM | 6140 | H61 | BGLC | 13 | 5.628 | -6.085-168.112 | 1.00 | 0.00 | CARO |
| ATOM | 6141 | H62 | BGLC | 13 | 5.838 | -7.169-166.749 | 1.00 | 0.00 | CARO |
| ATOM | 6142 | O6  | BGLC | 13 | 5.243 | -8.016-168.591 | 1.00 | 2.00 | CARO |
| ATOM | 6143 | HO6 | BGLC | 13 | 4.729 | -8.809-168.472 | 1.00 | 0.00 | CARO |
| ATOM | 6144 | C1  | BGLC | 14 | 3.475 | -5.583-170.801 | 1.00 | 2.00 | CARO |
| ATOM | 6145 | H1  | BGLC | 14 | 4.278 | -4.855-170.793 | 1.00 | 0.00 | CARO |
| ATOM | 6146 | C5  | BGLC | 14 | 2.306 | -4.413-172.521 | 1.00 | 2.00 | CARO |
| ATOM | 6147 | H5  | BGLC | 14 | 3.005 | -3.553-172.567 | 1.00 | 0.00 | CARO |
| ATOM | 6148 | O5  | BGLC | 14 | 2.278 | -4.974-171.222 | 1.00 | 2.00 | CARO |
| ATOM | 6149 | C2  | BGLC | 14 | 3.951 | -6.645-171.784 | 1.00 | 2.00 | CARO |
| ATOM | 6150 | H2  | BGLC | 14 | 3.175 | -7.477-171.781 | 1.00 | 0.00 | CARO |
| ATOM | 6151 | O2  | BGLC | 14 | 5.175 | -7.222-171.342 | 1.00 | 2.00 | CARO |
| ATOM | 6152 | HO2 | BGLC | 14 | 5.247 | -8.171-171.395 | 1.00 | 0.00 | CARO |
| ATOM | 6153 | C3  | BGLC | 14 | 4.098 | -6.042-173.166 | 1.00 | 2.00 | CARO |
| ATOM | 6154 | H3  | BGLC | 14 | 4.764 | -5.180-173.165 | 1.00 | 0.00 | CARO |

|      |      |     |      |    |       |                |      |      |      |
|------|------|-----|------|----|-------|----------------|------|------|------|
| ATOM | 6155 | O3  | BGLC | 14 | 4.532 | -7.066-174.042 | 1.00 | 2.00 | CARO |
| ATOM | 6156 | HO3 | BGLC | 14 | 5.411 | -7.407-173.991 | 1.00 | 0.00 | CARO |
| ATOM | 6157 | C4  | BGLC | 14 | 2.744 | -5.444-173.571 | 1.00 | 2.00 | CARO |
| ATOM | 6158 | H4  | BGLC | 14 | 1.980 | -6.212-173.644 | 1.00 | 0.00 | CARO |
| ATOM | 6159 | O4  | BGLC | 14 | 2.703 | -4.903-174.855 | 1.00 | 2.00 | CARO |
| ATOM | 6160 | C6  | BGLC | 14 | 0.834 | -3.980-172.794 | 1.00 | 2.00 | CARO |
| ATOM | 6161 | H61 | BGLC | 14 | 0.389 | -4.907-173.302 | 1.00 | 0.00 | CARO |
| ATOM | 6162 | H62 | BGLC | 14 | 0.181 | -3.817-171.943 | 1.00 | 0.00 | CARO |
| ATOM | 6163 | O6  | BGLC | 14 | 0.774 | -2.978-173.789 | 1.00 | 2.00 | CARO |
| ATOM | 6164 | HO6 | BGLC | 14 | 1.288 | -2.185-173.673 | 1.00 | 0.00 | CARO |
| ATOM | 6165 | C1  | BGLC | 15 | 2.540 | -5.421-175.991 | 1.00 | 2.00 | CARO |
| ATOM | 6166 | H1  | BGLC | 15 | 1.738 | -6.150-175.980 | 1.00 | 0.00 | CARO |
| ATOM | 6167 | C5  | BGLC | 15 | 3.709 | -6.597-177.707 | 1.00 | 2.00 | CARO |
| ATOM | 6168 | H5  | BGLC | 15 | 3.010 | -7.457-177.749 | 1.00 | 0.00 | CARO |
| ATOM | 6169 | O5  | BGLC | 15 | 3.738 | -6.030-176.411 | 1.00 | 2.00 | CARO |
| ATOM | 6170 | C2  | BGLC | 15 | 2.064 | -4.361-176.978 | 1.00 | 2.00 | CARO |
| ATOM | 6171 | H2  | BGLC | 15 | 2.839 | -3.528-176.979 | 1.00 | 0.00 | CARO |
| ATOM | 6172 | O2  | BGLC | 15 | 0.841 | -3.784-176.537 | 1.00 | 2.00 | CARO |
| ATOM | 6173 | HO2 | BGLC | 15 | 0.769 | -2.836-176.592 | 1.00 | 0.00 | CARO |
| ATOM | 6174 | C3  | BGLC | 15 | 1.916 | -4.969-178.357 | 1.00 | 2.00 | CARO |
| ATOM | 6175 | H3  | BGLC | 15 | 1.250 | -5.831-178.350 | 1.00 | 0.00 | CARO |
| ATOM | 6176 | O3  | BGLC | 15 | 1.481 | -3.950-179.237 | 1.00 | 2.00 | CARO |
| ATOM | 6177 | HO3 | BGLC | 15 | 0.602 | -3.610-179.187 | 1.00 | 0.00 | CARO |
| ATOM | 6178 | C4  | BGLC | 15 | 3.268 | -5.568-178.761 | 1.00 | 2.00 | CARO |
| ATOM | 6179 | H4  | BGLC | 15 | 4.032 | -4.801-178.839 | 1.00 | 0.00 | CARO |
| ATOM | 6180 | O4  | BGLC | 15 | 3.306 | -6.116-180.043 | 1.00 | 2.00 | CARO |
| ATOM | 6181 | C6  | BGLC | 15 | 5.179 | -7.031-177.980 | 1.00 | 2.00 | CARO |
| ATOM | 6182 | H61 | BGLC | 15 | 5.623 | -6.105-178.491 | 1.00 | 0.00 | CARO |
| ATOM | 6183 | H62 | BGLC | 15 | 5.833 | -7.191-177.129 | 1.00 | 0.00 | CARO |
| ATOM | 6184 | O6  | BGLC | 15 | 5.239 | -8.036-178.971 | 1.00 | 2.00 | CARO |
| ATOM | 6185 | HO6 | BGLC | 15 | 4.725 | -8.829-178.852 | 1.00 | 0.00 | CARO |
| ATOM | 6186 | C1  | BGLC | 16 | 3.470 | -5.604-181.181 | 1.00 | 2.00 | CARO |
| ATOM | 6187 | H1  | BGLC | 16 | 4.273 | -4.876-181.174 | 1.00 | 0.00 | CARO |
| ATOM | 6188 | C5  | BGLC | 16 | 2.301 | -4.434-182.901 | 1.00 | 2.00 | CARO |
| ATOM | 6189 | H5  | BGLC | 16 | 3.001 | -3.575-182.947 | 1.00 | 0.00 | CARO |
| ATOM | 6190 | O5  | BGLC | 16 | 2.273 | -4.996-181.602 | 1.00 | 2.00 | CARO |
| ATOM | 6191 | C2  | BGLC | 16 | 3.946 | -6.665-182.164 | 1.00 | 2.00 | CARO |
| ATOM | 6192 | H2  | BGLC | 16 | 3.170 | -7.496-182.161 | 1.00 | 0.00 | CARO |
| ATOM | 6193 | O2  | BGLC | 16 | 5.170 | -7.243-181.722 | 1.00 | 2.00 | CARO |
| ATOM | 6194 | HO2 | BGLC | 16 | 5.241 | -8.192-181.776 | 1.00 | 0.00 | CARO |
| ATOM | 6195 | C3  | BGLC | 16 | 4.093 | -6.063-183.546 | 1.00 | 2.00 | CARO |
| ATOM | 6196 | H3  | BGLC | 16 | 4.759 | -5.201-183.545 | 1.00 | 0.00 | CARO |
| ATOM | 6197 | O3  | BGLC | 16 | 4.527 | -7.087-184.422 | 1.00 | 2.00 | CARO |
| ATOM | 6198 | HO3 | BGLC | 16 | 5.406 | -7.428-184.371 | 1.00 | 0.00 | CARO |
| ATOM | 6199 | C4  | BGLC | 16 | 2.739 | -5.465-183.951 | 1.00 | 2.00 | CARO |
| ATOM | 6200 | H4  | BGLC | 16 | 1.975 | -6.233-184.024 | 1.00 | 0.00 | CARO |
| ATOM | 6201 | O4  | BGLC | 16 | 2.698 | -4.923-185.235 | 1.00 | 2.00 | CARO |
| ATOM | 6202 | C6  | BGLC | 16 | 0.830 | -3.999-183.174 | 1.00 | 2.00 | CARO |
| ATOM | 6203 | H61 | BGLC | 16 | 0.384 | -4.926-183.680 | 1.00 | 0.00 | CARO |
| ATOM | 6204 | H62 | BGLC | 16 | 0.177 | -3.835-182.323 | 1.00 | 0.00 | CARO |
| ATOM | 6205 | O6  | BGLC | 16 | 0.769 | -2.998-184.169 | 1.00 | 2.00 | CARO |
| ATOM | 6206 | HO6 | BGLC | 16 | 1.283 | -2.205-184.054 | 1.00 | 0.00 | CARO |
| ATOM | 6207 | C1  | BGLC | 17 | 2.536 | -5.440-186.371 | 1.00 | 2.00 | CARO |
| ATOM | 6208 | H1  | BGLC | 17 | 1.734 | -6.169-186.362 | 1.00 | 0.00 | CARO |

|      |      |     |      |    |       |                |      |      |      |
|------|------|-----|------|----|-------|----------------|------|------|------|
| ATOM | 6209 | C5  | BGLC | 17 | 3.705 | -6.616-188.087 | 1.00 | 2.00 | CARO |
| ATOM | 6210 | H5  | BGLC | 17 | 3.004 | -7.475-188.130 | 1.00 | 0.00 | CARO |
| ATOM | 6211 | O5  | BGLC | 17 | 3.734 | -6.050-186.791 | 1.00 | 2.00 | CARO |
| ATOM | 6212 | C2  | BGLC | 17 | 2.060 | -4.382-187.358 | 1.00 | 2.00 | CARO |
| ATOM | 6213 | H2  | BGLC | 17 | 2.835 | -3.550-187.360 | 1.00 | 0.00 | CARO |
| ATOM | 6214 | O2  | BGLC | 17 | 0.836 | -3.804-186.917 | 1.00 | 2.00 | CARO |
| ATOM | 6215 | HO2 | BGLC | 17 | 0.764 | -2.856-186.973 | 1.00 | 0.00 | CARO |
| ATOM | 6216 | C3  | BGLC | 17 | 1.911 | -4.991-188.737 | 1.00 | 2.00 | CARO |
| ATOM | 6217 | H3  | BGLC | 17 | 1.245 | -5.853-188.731 | 1.00 | 0.00 | CARO |
| ATOM | 6218 | O3  | BGLC | 17 | 1.476 | -3.972-189.617 | 1.00 | 2.00 | CARO |
| ATOM | 6219 | HO3 | BGLC | 17 | 0.597 | -3.631-189.566 | 1.00 | 0.00 | CARO |
| ATOM | 6220 | C4  | BGLC | 17 | 3.264 | -5.590-189.141 | 1.00 | 2.00 | CARO |
| ATOM | 6221 | H4  | BGLC | 17 | 4.027 | -4.822-189.219 | 1.00 | 0.00 | CARO |
| ATOM | 6222 | O4  | BGLC | 17 | 3.303 | -6.137-190.423 | 1.00 | 2.00 | CARO |
| ATOM | 6223 | C6  | BGLC | 17 | 5.174 | -7.052-188.360 | 1.00 | 2.00 | CARO |
| ATOM | 6224 | H61 | BGLC | 17 | 5.619 | -6.126-188.870 | 1.00 | 0.00 | CARO |
| ATOM | 6225 | H62 | BGLC | 17 | 5.828 | -7.213-187.509 | 1.00 | 0.00 | CARO |
| ATOM | 6226 | O6  | BGLC | 17 | 5.235 | -8.057-189.351 | 1.00 | 2.00 | CARO |
| ATOM | 6227 | HO6 | BGLC | 17 | 4.721 | -8.850-189.233 | 1.00 | 0.00 | CARO |
| ATOM | 6228 | C1  | BGLC | 18 | 3.465 | -5.624-191.561 | 1.00 | 2.00 | CARO |
| ATOM | 6229 | H1  | BGLC | 18 | 4.267 | -4.895-191.554 | 1.00 | 0.00 | CARO |
| ATOM | 6230 | C5  | BGLC | 18 | 2.297 | -4.455-193.281 | 1.00 | 2.00 | CARO |
| ATOM | 6231 | H5  | BGLC | 18 | 2.997 | -3.596-193.327 | 1.00 | 0.00 | CARO |
| ATOM | 6232 | O5  | BGLC | 18 | 2.268 | -5.016-191.982 | 1.00 | 2.00 | CARO |
| ATOM | 6233 | C2  | BGLC | 18 | 3.942 | -6.686-192.544 | 1.00 | 2.00 | CARO |
| ATOM | 6234 | H2  | BGLC | 18 | 3.166 | -7.518-192.541 | 1.00 | 0.00 | CARO |
| ATOM | 6235 | O2  | BGLC | 18 | 5.165 | -7.263-192.102 | 1.00 | 2.00 | CARO |
| ATOM | 6236 | HO2 | BGLC | 18 | 5.237 | -8.212-192.155 | 1.00 | 0.00 | CARO |
| ATOM | 6237 | C3  | BGLC | 18 | 4.089 | -6.083-193.926 | 1.00 | 2.00 | CARO |
| ATOM | 6238 | H3  | BGLC | 18 | 4.755 | -5.221-193.925 | 1.00 | 0.00 | CARO |
| ATOM | 6239 | O3  | BGLC | 18 | 4.523 | -7.108-194.802 | 1.00 | 2.00 | CARO |
| ATOM | 6240 | HO3 | BGLC | 18 | 5.402 | -7.449-194.751 | 1.00 | 0.00 | CARO |
| ATOM | 6241 | C4  | BGLC | 18 | 2.735 | -5.486-194.331 | 1.00 | 2.00 | CARO |
| ATOM | 6242 | H4  | BGLC | 18 | 1.971 | -6.254-194.404 | 1.00 | 0.00 | CARO |
| ATOM | 6243 | O4  | BGLC | 18 | 2.693 | -4.943-195.615 | 1.00 | 2.00 | CARO |
| ATOM | 6244 | C6  | BGLC | 18 | 0.826 | -4.021-193.554 | 1.00 | 2.00 | CARO |
| ATOM | 6245 | H61 | BGLC | 18 | 0.381 | -4.949-194.060 | 1.00 | 0.00 | CARO |
| ATOM | 6246 | H62 | BGLC | 18 | 0.173 | -3.858-192.703 | 1.00 | 0.00 | CARO |
| ATOM | 6247 | O6  | BGLC | 18 | 0.764 | -3.019-194.549 | 1.00 | 2.00 | CARO |
| ATOM | 6248 | HO6 | BGLC | 18 | 1.278 | -2.226-194.434 | 1.00 | 0.00 | CARO |
| ATOM | 6249 | C1  | BGLC | 19 | 2.531 | -5.462-196.751 | 1.00 | 2.00 | CARO |
| ATOM | 6250 | H1  | BGLC | 19 | 1.730 | -6.192-196.740 | 1.00 | 0.00 | CARO |
| ATOM | 6251 | C5  | BGLC | 19 | 3.700 | -6.638-198.467 | 1.00 | 2.00 | CARO |
| ATOM | 6252 | H5  | BGLC | 19 | 3.001 | -7.498-198.509 | 1.00 | 0.00 | CARO |
| ATOM | 6253 | O5  | BGLC | 19 | 3.729 | -6.071-197.171 | 1.00 | 2.00 | CARO |
| ATOM | 6254 | C2  | BGLC | 19 | 2.055 | -4.402-197.738 | 1.00 | 2.00 | CARO |
| ATOM | 6255 | H2  | BGLC | 19 | 2.830 | -3.570-197.740 | 1.00 | 0.00 | CARO |
| ATOM | 6256 | O2  | BGLC | 19 | 0.832 | -3.824-197.297 | 1.00 | 2.00 | CARO |
| ATOM | 6257 | HO2 | BGLC | 19 | 0.760 | -2.876-197.352 | 1.00 | 0.00 | CARO |
| ATOM | 6258 | C3  | BGLC | 19 | 1.906 | -5.011-199.117 | 1.00 | 2.00 | CARO |
| ATOM | 6259 | H3  | BGLC | 19 | 1.240 | -5.873-199.110 | 1.00 | 0.00 | CARO |
| ATOM | 6260 | O3  | BGLC | 19 | 1.471 | -3.992-199.997 | 1.00 | 2.00 | CARO |
| ATOM | 6261 | HO3 | BGLC | 19 | 0.592 | -3.651-199.946 | 1.00 | 0.00 | CARO |
| ATOM | 6262 | C4  | BGLC | 19 | 3.259 | -5.611-199.521 | 1.00 | 2.00 | CARO |

|      |      |     |      |    |        |                 |      |      |      |
|------|------|-----|------|----|--------|-----------------|------|------|------|
| ATOM | 6263 | H4  | BGLC | 19 | 4.022  | -4.843-199.598  | 1.00 | 0.00 | CARO |
| ATOM | 6264 | O4  | BGLC | 19 | 3.299  | -6.158-200.803  | 1.00 | 2.00 | CARO |
| ATOM | 6265 | C6  | BGLC | 19 | 5.170  | -7.072-198.740  | 1.00 | 2.00 | CARO |
| ATOM | 6266 | H61 | BGLC | 19 | 5.614  | -6.147-199.251  | 1.00 | 0.00 | CARO |
| ATOM | 6267 | H62 | BGLC | 19 | 5.824  | -7.231-197.889  | 1.00 | 0.00 | CARO |
| ATOM | 6268 | O6  | BGLC | 19 | 5.230  | -8.078-199.731  | 1.00 | 2.00 | CARO |
| ATOM | 6269 | HO6 | BGLC | 19 | 4.717  | -8.871-199.612  | 1.00 | 0.00 | CARO |
| ATOM | 6270 | C1  | BGLC | 20 | 3.460  | -5.645-201.941  | 1.00 | 2.00 | CARO |
| ATOM | 6271 | H1  | BGLC | 20 | 4.262  | -4.916-201.935  | 1.00 | 0.00 | CARO |
| ATOM | 6272 | C5  | BGLC | 20 | 2.292  | -4.475-203.661  | 1.00 | 2.00 | CARO |
| ATOM | 6273 | H5  | BGLC | 20 | 2.992  | -3.616-203.706  | 1.00 | 0.00 | CARO |
| ATOM | 6274 | O5  | BGLC | 20 | 2.263  | -5.037-202.362  | 1.00 | 2.00 | CARO |
| ATOM | 6275 | C2  | BGLC | 20 | 3.937  | -6.708-202.924  | 1.00 | 2.00 | CARO |
| ATOM | 6276 | H2  | BGLC | 20 | 3.161  | -7.540-202.922  | 1.00 | 0.00 | CARO |
| ATOM | 6277 | O2  | BGLC | 20 | 5.160  | -7.285-202.482  | 1.00 | 2.00 | CARO |
| ATOM | 6278 | HO2 | BGLC | 20 | 5.231  | -8.234-202.535  | 1.00 | 0.00 | CARO |
| ATOM | 6279 | C3  | BGLC | 20 | 4.084  | -6.104-204.306  | 1.00 | 2.00 | CARO |
| ATOM | 6280 | H3  | BGLC | 20 | 4.750  | -5.242-204.304  | 1.00 | 0.00 | CARO |
| ATOM | 6281 | O3  | BGLC | 20 | 4.519  | -7.128-205.182  | 1.00 | 2.00 | CARO |
| ATOM | 6282 | HO3 | BGLC | 20 | 5.398  | -7.468-205.131  | 1.00 | 0.00 | CARO |
| ATOM | 6283 | C4  | BGLC | 20 | 2.730  | -5.506-204.711  | 1.00 | 2.00 | CARO |
| ATOM | 6284 | H4  | BGLC | 20 | 1.902  | -6.182-204.900  | 1.00 | 0.00 | CARO |
| ATOM | 6285 | O4  | BGLC | 20 | 2.849  | -4.771-205.939  | 1.00 | 2.00 | CARO |
| ATOM | 6286 | HO4 | BGLC | 20 | 3.346  | -5.316-206.601  | 1.00 | 0.00 | CARO |
| ATOM | 6287 | C6  | BGLC | 20 | 0.821  | -4.041-203.934  | 1.00 | 2.00 | CARO |
| ATOM | 6288 | H61 | BGLC | 20 | 0.376  | -4.969-204.440  | 1.00 | 0.00 | CARO |
| ATOM | 6289 | H62 | BGLC | 20 | 0.168  | -3.878-203.083  | 1.00 | 0.00 | CARO |
| ATOM | 6290 | O6  | BGLC | 20 | 0.759  | -3.039-204.929  | 1.00 | 2.00 | CARO |
| ATOM | 6291 | HO6 | BGLC | 20 | 1.273  | -2.246-204.814  | 1.00 | 0.00 | CARO |
| ATOM | 6292 | C1  | BGLC | 1  | 8.567  | -10.870-103.323 | 1.00 | 2.00 | CARP |
| ATOM | 6293 | H1  | BGLC | 1  | 7.724  | -11.542-103.215 | 1.00 | 0.00 | CARP |
| ATOM | 6294 | O1  | BGLC | 1  | 8.888  | -10.158-102.130 | 1.00 | 2.00 | CARP |
| ATOM | 6295 | HO1 | BGLC | 1  | 9.396  | -9.420-102.391  | 1.00 | 0.00 | CARP |
| ATOM | 6296 | C5  | BGLC | 1  | 9.735  | -12.046-105.039 | 1.00 | 2.00 | CARP |
| ATOM | 6297 | H5  | BGLC | 1  | 9.036  | -12.906-105.082 | 1.00 | 0.00 | CARP |
| ATOM | 6298 | O5  | BGLC | 1  | 9.764  | -11.480-103.742 | 1.00 | 2.00 | CARP |
| ATOM | 6299 | C2  | BGLC | 1  | 8.089  | -9.810-104.310  | 1.00 | 2.00 | CARP |
| ATOM | 6300 | H2  | BGLC | 1  | 8.863  | -8.976-104.313  | 1.00 | 0.00 | CARP |
| ATOM | 6301 | O2  | BGLC | 1  | 6.867  | -9.233-103.868  | 1.00 | 2.00 | CARP |
| ATOM | 6302 | HO2 | BGLC | 1  | 6.795  | -8.285-103.924  | 1.00 | 0.00 | CARP |
| ATOM | 6303 | C3  | BGLC | 1  | 7.942  | -10.421-105.688 | 1.00 | 2.00 | CARP |
| ATOM | 6304 | H3  | BGLC | 1  | 7.276  | -11.283-105.683 | 1.00 | 0.00 | CARP |
| ATOM | 6305 | O3  | BGLC | 1  | 7.507  | -9.399-106.568  | 1.00 | 2.00 | CARP |
| ATOM | 6306 | HO3 | BGLC | 1  | 6.628  | -9.058-106.517  | 1.00 | 0.00 | CARP |
| ATOM | 6307 | C4  | BGLC | 1  | 9.295  | -11.020-106.093 | 1.00 | 2.00 | CARP |
| ATOM | 6308 | H4  | BGLC | 1  | 10.059 | -10.252-106.171 | 1.00 | 0.00 | CARP |
| ATOM | 6309 | O4  | BGLC | 1  | 9.335  | -11.568-107.374 | 1.00 | 2.00 | CARP |
| ATOM | 6310 | C6  | BGLC | 1  | 11.206 | -12.480-105.312 | 1.00 | 2.00 | CARP |
| ATOM | 6311 | H61 | BGLC | 1  | 11.650 | -11.555-105.824 | 1.00 | 0.00 | CARP |
| ATOM | 6312 | H62 | BGLC | 1  | 11.861 | -12.639-104.461 | 1.00 | 0.00 | CARP |
| ATOM | 6313 | O6  | BGLC | 1  | 11.266 | -13.487-106.303 | 1.00 | 2.00 | CARP |
| ATOM | 6314 | HO6 | BGLC | 1  | 10.753 | -14.280-106.183 | 1.00 | 0.00 | CARP |
| ATOM | 6315 | C1  | BGLC | 2  | 9.497  | -11.053-108.513 | 1.00 | 2.00 | CARP |
| ATOM | 6316 | H1  | BGLC | 2  | 10.299 | -10.324-108.505 | 1.00 | 0.00 | CARP |

|      |      |     |      |   |        |                 |      |      |      |
|------|------|-----|------|---|--------|-----------------|------|------|------|
| ATOM | 6317 | C5  | BGLC | 2 | 8.328  | -9.883-110.233  | 1.00 | 2.00 | CARP |
| ATOM | 6318 | H5  | BGLC | 2 | 9.028  | -9.023-110.279  | 1.00 | 0.00 | CARP |
| ATOM | 6319 | O5  | BGLC | 2 | 8.300  | -10.445-108.934 | 1.00 | 2.00 | CARP |
| ATOM | 6320 | C2  | BGLC | 2 | 9.974  | -12.116-109.496 | 1.00 | 2.00 | CARP |
| ATOM | 6321 | H2  | BGLC | 2 | 9.198  | -12.948-109.494 | 1.00 | 0.00 | CARP |
| ATOM | 6322 | O2  | BGLC | 2 | 11.196 | -12.694-109.053 | 1.00 | 2.00 | CARP |
| ATOM | 6323 | HO2 | BGLC | 2 | 11.267 | -13.643-109.106 | 1.00 | 0.00 | CARP |
| ATOM | 6324 | C3  | BGLC | 2 | 10.121 | -11.512-110.877 | 1.00 | 2.00 | CARP |
| ATOM | 6325 | H3  | BGLC | 2 | 10.787 | -10.650-110.876 | 1.00 | 0.00 | CARP |
| ATOM | 6326 | O3  | BGLC | 2 | 10.555 | -12.536-111.753 | 1.00 | 2.00 | CARP |
| ATOM | 6327 | HO3 | BGLC | 2 | 11.434 | -12.877-111.702 | 1.00 | 0.00 | CARP |
| ATOM | 6328 | C4  | BGLC | 2 | 8.767  | -10.915-111.283 | 1.00 | 2.00 | CARP |
| ATOM | 6329 | H4  | BGLC | 2 | 8.003  | -11.682-111.357 | 1.00 | 0.00 | CARP |
| ATOM | 6330 | O4  | BGLC | 2 | 8.727  | -10.373-112.567 | 1.00 | 2.00 | CARP |
| ATOM | 6331 | C6  | BGLC | 2 | 6.858  | -9.450-110.506  | 1.00 | 2.00 | CARP |
| ATOM | 6332 | H61 | BGLC | 2 | 6.414  | -10.378-111.013 | 1.00 | 0.00 | CARP |
| ATOM | 6333 | H62 | BGLC | 2 | 6.205  | -9.287-109.655  | 1.00 | 0.00 | CARP |
| ATOM | 6334 | O6  | BGLC | 2 | 6.796  | -8.448-111.501  | 1.00 | 2.00 | CARP |
| ATOM | 6335 | HO6 | BGLC | 2 | 7.309  | -7.654-111.386  | 1.00 | 0.00 | CARP |
| ATOM | 6336 | C1  | BGLC | 3 | 8.562  | -10.891-113.703 | 1.00 | 2.00 | CARP |
| ATOM | 6337 | H1  | BGLC | 3 | 7.759  | -11.619-113.691 | 1.00 | 0.00 | CARP |
| ATOM | 6338 | C5  | BGLC | 3 | 9.731  | -12.066-115.419 | 1.00 | 2.00 | CARP |
| ATOM | 6339 | H5  | BGLC | 3 | 9.031  | -12.925-115.462 | 1.00 | 0.00 | CARP |
| ATOM | 6340 | O5  | BGLC | 3 | 9.760  | -11.501-114.122 | 1.00 | 2.00 | CARP |
| ATOM | 6341 | C2  | BGLC | 3 | 8.086  | -9.831-114.690  | 1.00 | 2.00 | CARP |
| ATOM | 6342 | H2  | BGLC | 3 | 8.860  | -8.997-114.693  | 1.00 | 0.00 | CARP |
| ATOM | 6343 | O2  | BGLC | 3 | 6.862  | -9.254-114.248  | 1.00 | 2.00 | CARP |
| ATOM | 6344 | HO2 | BGLC | 3 | 6.790  | -8.306-114.303  | 1.00 | 0.00 | CARP |
| ATOM | 6345 | C3  | BGLC | 3 | 7.938  | -10.441-116.068 | 1.00 | 2.00 | CARP |
| ATOM | 6346 | H3  | BGLC | 3 | 7.271  | -11.303-116.061 | 1.00 | 0.00 | CARP |
| ATOM | 6347 | O3  | BGLC | 3 | 7.502  | -9.420-116.948  | 1.00 | 2.00 | CARP |
| ATOM | 6348 | HO3 | BGLC | 3 | 6.623  | -9.079-116.897  | 1.00 | 0.00 | CARP |
| ATOM | 6349 | C4  | BGLC | 3 | 9.290  | -11.041-116.473 | 1.00 | 2.00 | CARP |
| ATOM | 6350 | H4  | BGLC | 3 | 10.052 | -10.272-116.550 | 1.00 | 0.00 | CARP |
| ATOM | 6351 | O4  | BGLC | 3 | 9.332  | -11.589-117.754 | 1.00 | 2.00 | CARP |
| ATOM | 6352 | C6  | BGLC | 3 | 11.201 | -12.501-115.692 | 1.00 | 2.00 | CARP |
| ATOM | 6353 | H61 | BGLC | 3 | 11.645 | -11.576-116.203 | 1.00 | 0.00 | CARP |
| ATOM | 6354 | H62 | BGLC | 3 | 11.855 | -12.661-114.841 | 1.00 | 0.00 | CARP |
| ATOM | 6355 | O6  | BGLC | 3 | 11.261 | -13.507-116.683 | 1.00 | 2.00 | CARP |
| ATOM | 6356 | HO6 | BGLC | 3 | 10.747 | -14.300-116.564 | 1.00 | 0.00 | CARP |
| ATOM | 6357 | C1  | BGLC | 4 | 9.492  | -11.073-118.893 | 1.00 | 2.00 | CARP |
| ATOM | 6358 | H1  | BGLC | 4 | 10.293 | -10.344-118.886 | 1.00 | 0.00 | CARP |
| ATOM | 6359 | C5  | BGLC | 4 | 8.324  | -9.904-120.613  | 1.00 | 2.00 | CARP |
| ATOM | 6360 | H5  | BGLC | 4 | 9.024  | -9.045-120.660  | 1.00 | 0.00 | CARP |
| ATOM | 6361 | O5  | BGLC | 4 | 8.296  | -10.465-119.314 | 1.00 | 2.00 | CARP |
| ATOM | 6362 | C2  | BGLC | 4 | 9.969  | -12.137-119.876 | 1.00 | 2.00 | CARP |
| ATOM | 6363 | H2  | BGLC | 4 | 9.193  | -12.969-119.874 | 1.00 | 0.00 | CARP |
| ATOM | 6364 | O2  | BGLC | 4 | 11.192 | -12.715-119.433 | 1.00 | 2.00 | CARP |
| ATOM | 6365 | HO2 | BGLC | 4 | 11.263 | -13.664-119.486 | 1.00 | 0.00 | CARP |
| ATOM | 6366 | C3  | BGLC | 4 | 10.116 | -11.533-121.257 | 1.00 | 2.00 | CARP |
| ATOM | 6367 | H3  | BGLC | 4 | 10.782 | -10.671-121.255 | 1.00 | 0.00 | CARP |
| ATOM | 6368 | O3  | BGLC | 4 | 10.550 | -12.557-122.133 | 1.00 | 2.00 | CARP |
| ATOM | 6369 | HO3 | BGLC | 4 | 11.429 | -12.898-122.082 | 1.00 | 0.00 | CARP |
| ATOM | 6370 | C4  | BGLC | 4 | 8.762  | -10.935-121.663 | 1.00 | 2.00 | CARP |

|      |      |     |      |   |        |                 |      |      |      |
|------|------|-----|------|---|--------|-----------------|------|------|------|
| ATOM | 6371 | H4  | BGLC | 4 | 7.997  | -11.702-121.737 | 1.00 | 0.00 | CARP |
| ATOM | 6372 | O4  | BGLC | 4 | 8.723  | -10.393-122.947 | 1.00 | 2.00 | CARP |
| ATOM | 6373 | C6  | BGLC | 4 | 6.853  | -9.470-120.886  | 1.00 | 2.00 | CARP |
| ATOM | 6374 | H61 | BGLC | 4 | 6.408  | -10.397-121.393 | 1.00 | 0.00 | CARP |
| ATOM | 6375 | H62 | BGLC | 4 | 6.200  | -9.307-120.035  | 1.00 | 0.00 | CARP |
| ATOM | 6376 | O6  | BGLC | 4 | 6.792  | -8.468-121.881  | 1.00 | 2.00 | CARP |
| ATOM | 6377 | HO6 | BGLC | 4 | 7.306  | -7.675-121.766  | 1.00 | 0.00 | CARP |
| ATOM | 6378 | C1  | BGLC | 5 | 8.557  | -10.912-124.083 | 1.00 | 2.00 | CARP |
| ATOM | 6379 | H1  | BGLC | 5 | 7.755  | -11.640-124.070 | 1.00 | 0.00 | CARP |
| ATOM | 6380 | C5  | BGLC | 5 | 9.726  | -12.087-125.799 | 1.00 | 2.00 | CARP |
| ATOM | 6381 | H5  | BGLC | 5 | 9.026  | -12.947-125.842 | 1.00 | 0.00 | CARP |
| ATOM | 6382 | O5  | BGLC | 5 | 9.755  | -11.522-124.502 | 1.00 | 2.00 | CARP |
| ATOM | 6383 | C2  | BGLC | 5 | 8.081  | -9.851-125.070  | 1.00 | 2.00 | CARP |
| ATOM | 6384 | H2  | BGLC | 5 | 8.855  | -9.017-125.073  | 1.00 | 0.00 | CARP |
| ATOM | 6385 | O2  | BGLC | 5 | 6.858  | -9.274-124.628  | 1.00 | 2.00 | CARP |
| ATOM | 6386 | HO2 | BGLC | 5 | 6.786  | -8.326-124.683  | 1.00 | 0.00 | CARP |
| ATOM | 6387 | C3  | BGLC | 5 | 7.933  | -10.462-126.448 | 1.00 | 2.00 | CARP |
| ATOM | 6388 | H3  | BGLC | 5 | 7.267  | -11.324-126.441 | 1.00 | 0.00 | CARP |
| ATOM | 6389 | O3  | BGLC | 5 | 7.497  | -9.442-127.328  | 1.00 | 2.00 | CARP |
| ATOM | 6390 | HO3 | BGLC | 5 | 6.618  | -9.102-127.277  | 1.00 | 0.00 | CARP |
| ATOM | 6391 | C4  | BGLC | 5 | 9.285  | -11.061-126.853 | 1.00 | 2.00 | CARP |
| ATOM | 6392 | H4  | BGLC | 5 | 10.048 | -10.292-126.930 | 1.00 | 0.00 | CARP |
| ATOM | 6393 | O4  | BGLC | 5 | 9.327  | -11.609-128.134 | 1.00 | 2.00 | CARP |
| ATOM | 6394 | C6  | BGLC | 5 | 11.198 | -12.521-126.072 | 1.00 | 2.00 | CARP |
| ATOM | 6395 | O61 | BGLC | 5 | 11.291 | -13.914-126.309 | 1.00 | 0.00 | CARP |
| ATOM | 6396 | O62 | BGLC | 5 | 11.841 | -11.637-126.018 | 1.00 | 0.00 | CARP |
| ATOM | 6397 | C1  | BGLC | 6 | 9.487  | -11.095-129.273 | 1.00 | 2.00 | CARP |
| ATOM | 6398 | H1  | BGLC | 6 | 10.289 | -10.366-129.267 | 1.00 | 0.00 | CARP |
| ATOM | 6399 | C5  | BGLC | 6 | 8.319  | -9.924-130.993  | 1.00 | 2.00 | CARP |
| ATOM | 6400 | H5  | BGLC | 6 | 9.018  | -9.064-131.038  | 1.00 | 0.00 | CARP |
| ATOM | 6401 | O5  | BGLC | 6 | 8.291  | -10.487-129.694 | 1.00 | 2.00 | CARP |
| ATOM | 6402 | C2  | BGLC | 6 | 9.965  | -12.157-130.256 | 1.00 | 2.00 | CARP |
| ATOM | 6403 | H2  | BGLC | 6 | 9.189  | -12.988-130.253 | 1.00 | 0.00 | CARP |
| ATOM | 6404 | O2  | BGLC | 6 | 11.188 | -12.735-129.813 | 1.00 | 2.00 | CARP |
| ATOM | 6405 | HO2 | BGLC | 6 | 11.259 | -13.684-129.867 | 1.00 | 0.00 | CARP |
| ATOM | 6406 | C3  | BGLC | 6 | 10.112 | -11.555-131.637 | 1.00 | 2.00 | CARP |
| ATOM | 6407 | H3  | BGLC | 6 | 10.778 | -10.693-131.635 | 1.00 | 0.00 | CARP |
| ATOM | 6408 | O3  | BGLC | 6 | 10.545 | -12.577-132.513 | 1.00 | 2.00 | CARP |
| ATOM | 6409 | HO3 | BGLC | 6 | 11.424 | -12.918-132.463 | 1.00 | 0.00 | CARP |
| ATOM | 6410 | C4  | BGLC | 6 | 8.758  | -10.957-132.043 | 1.00 | 2.00 | CARP |
| ATOM | 6411 | H4  | BGLC | 6 | 7.993  | -11.724-132.116 | 1.00 | 0.00 | CARP |
| ATOM | 6412 | O4  | BGLC | 6 | 8.718  | -10.415-133.327 | 1.00 | 2.00 | CARP |
| ATOM | 6413 | C6  | BGLC | 6 | 6.848  | -9.491-131.266  | 1.00 | 2.00 | CARP |
| ATOM | 6414 | H61 | BGLC | 6 | 6.403  | -10.418-131.773 | 1.00 | 0.00 | CARP |
| ATOM | 6415 | H62 | BGLC | 6 | 6.195  | -9.328-130.415  | 1.00 | 0.00 | CARP |
| ATOM | 6416 | O6  | BGLC | 6 | 6.788  | -8.490-132.261  | 1.00 | 2.00 | CARP |
| ATOM | 6417 | HO6 | BGLC | 6 | 7.302  | -7.697-132.146  | 1.00 | 0.00 | CARP |
| ATOM | 6418 | C1  | BGLC | 7 | 8.552  | -10.933-134.463 | 1.00 | 2.00 | CARP |
| ATOM | 6419 | H1  | BGLC | 7 | 7.749  | -11.661-134.451 | 1.00 | 0.00 | CARP |
| ATOM | 6420 | C5  | BGLC | 7 | 9.722  | -12.108-136.179 | 1.00 | 2.00 | CARP |
| ATOM | 6421 | H5  | BGLC | 7 | 9.022  | -12.967-136.222 | 1.00 | 0.00 | CARP |
| ATOM | 6422 | O5  | BGLC | 7 | 9.751  | -11.543-134.882 | 1.00 | 2.00 | CARP |
| ATOM | 6423 | C2  | BGLC | 7 | 8.076  | -9.873-135.450  | 1.00 | 2.00 | CARP |
| ATOM | 6424 | H2  | BGLC | 7 | 8.851  | -9.040-135.452  | 1.00 | 0.00 | CARP |

|      |      |     |      |   |        |                 |      |      |      |
|------|------|-----|------|---|--------|-----------------|------|------|------|
| ATOM | 6425 | O2  | BGLC | 7 | 6.854  | -9.295-135.008  | 1.00 | 2.00 | CARP |
| ATOM | 6426 | HO2 | BGLC | 7 | 6.782  | -8.347-135.063  | 1.00 | 0.00 | CARP |
| ATOM | 6427 | C3  | BGLC | 7 | 7.928  | -10.482-136.828 | 1.00 | 2.00 | CARP |
| ATOM | 6428 | H3  | BGLC | 7 | 7.262  | -11.344-136.821 | 1.00 | 0.00 | CARP |
| ATOM | 6429 | O3  | BGLC | 7 | 7.494  | -9.463-137.708  | 1.00 | 2.00 | CARP |
| ATOM | 6430 | HO3 | BGLC | 7 | 6.615  | -9.122-137.658  | 1.00 | 0.00 | CARP |
| ATOM | 6431 | C4  | BGLC | 7 | 9.281  | -11.082-137.233 | 1.00 | 2.00 | CARP |
| ATOM | 6432 | H4  | BGLC | 7 | 10.044 | -10.313-137.310 | 1.00 | 0.00 | CARP |
| ATOM | 6433 | O4  | BGLC | 7 | 9.322  | -11.629-138.514 | 1.00 | 2.00 | CARP |
| ATOM | 6434 | C6  | BGLC | 7 | 11.193 | -12.543-136.452 | 1.00 | 2.00 | CARP |
| ATOM | 6435 | H61 | BGLC | 7 | 11.638 | -11.618-136.963 | 1.00 | 0.00 | CARP |
| ATOM | 6436 | H62 | BGLC | 7 | 11.847 | -12.703-135.601 | 1.00 | 0.00 | CARP |
| ATOM | 6437 | O6  | BGLC | 7 | 11.252 | -13.549-137.443 | 1.00 | 2.00 | CARP |
| ATOM | 6438 | HO6 | BGLC | 7 | 10.738 | -14.341-137.324 | 1.00 | 0.00 | CARP |
| ATOM | 6439 | C1  | BGLC | 8 | 9.484  | -11.116-139.653 | 1.00 | 2.00 | CARP |
| ATOM | 6440 | H1  | BGLC | 8 | 10.286 | -10.388-139.647 | 1.00 | 0.00 | CARP |
| ATOM | 6441 | C5  | BGLC | 8 | 8.314  | -9.945-141.373  | 1.00 | 2.00 | CARP |
| ATOM | 6442 | H5  | BGLC | 8 | 9.013  | -9.085-141.419  | 1.00 | 0.00 | CARP |
| ATOM | 6443 | O5  | BGLC | 8 | 8.287  | -10.508-140.074 | 1.00 | 2.00 | CARP |
| ATOM | 6444 | C2  | BGLC | 8 | 9.960  | -12.177-140.636 | 1.00 | 2.00 | CARP |
| ATOM | 6445 | H2  | BGLC | 8 | 9.183  | -13.008-140.633 | 1.00 | 0.00 | CARP |
| ATOM | 6446 | O2  | BGLC | 8 | 11.183 | -12.756-140.193 | 1.00 | 2.00 | CARP |
| ATOM | 6447 | HO2 | BGLC | 8 | 11.254 | -13.705-140.247 | 1.00 | 0.00 | CARP |
| ATOM | 6448 | C3  | BGLC | 8 | 10.107 | -11.575-142.017 | 1.00 | 2.00 | CARP |
| ATOM | 6449 | H3  | BGLC | 8 | 10.773 | -10.713-142.015 | 1.00 | 0.00 | CARP |
| ATOM | 6450 | O3  | BGLC | 8 | 10.540 | -12.598-142.893 | 1.00 | 2.00 | CARP |
| ATOM | 6451 | HO3 | BGLC | 8 | 11.419 | -12.939-142.842 | 1.00 | 0.00 | CARP |
| ATOM | 6452 | C4  | BGLC | 8 | 8.754  | -10.977-142.423 | 1.00 | 2.00 | CARP |
| ATOM | 6453 | H4  | BGLC | 8 | 7.990  | -11.745-142.496 | 1.00 | 0.00 | CARP |
| ATOM | 6454 | O4  | BGLC | 8 | 8.713  | -10.435-143.707 | 1.00 | 2.00 | CARP |
| ATOM | 6455 | C6  | BGLC | 8 | 6.845  | -9.512-141.646  | 1.00 | 2.00 | CARP |
| ATOM | 6456 | H61 | BGLC | 8 | 6.401  | -10.440-142.153 | 1.00 | 0.00 | CARP |
| ATOM | 6457 | H62 | BGLC | 8 | 6.191  | -9.349-140.795  | 1.00 | 0.00 | CARP |
| ATOM | 6458 | O6  | BGLC | 8 | 6.783  | -8.510-142.641  | 1.00 | 2.00 | CARP |
| ATOM | 6459 | HO6 | BGLC | 8 | 7.296  | -7.716-142.526  | 1.00 | 0.00 | CARP |
| ATOM | 6460 | C1  | BGLC | 9 | 8.548  | -10.952-144.843 | 1.00 | 2.00 | CARP |
| ATOM | 6461 | H1  | BGLC | 9 | 7.745  | -11.679-144.832 | 1.00 | 0.00 | CARP |
| ATOM | 6462 | C5  | BGLC | 9 | 9.718  | -12.129-146.559 | 1.00 | 2.00 | CARP |
| ATOM | 6463 | H5  | BGLC | 9 | 9.018  | -12.989-146.602 | 1.00 | 0.00 | CARP |
| ATOM | 6464 | O5  | BGLC | 9 | 9.746  | -11.563-145.262 | 1.00 | 2.00 | CARP |
| ATOM | 6465 | C2  | BGLC | 9 | 8.072  | -9.895-145.830  | 1.00 | 2.00 | CARP |
| ATOM | 6466 | H2  | BGLC | 9 | 8.848  | -9.063-145.832  | 1.00 | 0.00 | CARP |
| ATOM | 6467 | O2  | BGLC | 9 | 6.850  | -9.316-145.388  | 1.00 | 2.00 | CARP |
| ATOM | 6468 | HO2 | BGLC | 9 | 6.779  | -8.368-145.445  | 1.00 | 0.00 | CARP |
| ATOM | 6469 | C3  | BGLC | 9 | 7.923  | -10.503-147.208 | 1.00 | 2.00 | CARP |
| ATOM | 6470 | H3  | BGLC | 9 | 7.257  | -11.365-147.202 | 1.00 | 0.00 | CARP |
| ATOM | 6471 | O3  | BGLC | 9 | 7.489  | -9.483-148.088  | 1.00 | 2.00 | CARP |
| ATOM | 6472 | HO3 | BGLC | 9 | 6.610  | -9.141-148.038  | 1.00 | 0.00 | CARP |
| ATOM | 6473 | C4  | BGLC | 9 | 9.277  | -11.103-147.613 | 1.00 | 2.00 | CARP |
| ATOM | 6474 | H4  | BGLC | 9 | 10.040 | -10.334-147.690 | 1.00 | 0.00 | CARP |
| ATOM | 6475 | O4  | BGLC | 9 | 9.318  | -11.650-148.894 | 1.00 | 2.00 | CARP |
| ATOM | 6476 | C6  | BGLC | 9 | 11.188 | -12.564-146.832 | 1.00 | 2.00 | CARP |
| ATOM | 6477 | O61 | BGLC | 9 | 11.280 | -13.957-147.068 | 1.00 | 0.00 | CARP |
| ATOM | 6478 | O62 | BGLC | 9 | 11.831 | -11.680-146.779 | 1.00 | 0.00 | CARP |



|      |      |     |      |    |        |         |          |      |      |      |
|------|------|-----|------|----|--------|---------|----------|------|------|------|
| ATOM | 6479 | C1  | BGLC | 10 | 9.479  | -11.136 | -150.033 | 1.00 | 2.00 | CARP |
| ATOM | 6480 | H1  | BGLC | 10 | 10.281 | -10.407 | -150.027 | 1.00 | 0.00 | CARP |
| ATOM | 6481 | C5  | BGLC | 10 | 8.309  | -9.965  | -151.753 | 1.00 | 2.00 | CARP |
| ATOM | 6482 | H5  | BGLC | 10 | 9.008  | -9.105  | -151.799 | 1.00 | 0.00 | CARP |
| ATOM | 6483 | O5  | BGLC | 10 | 8.282  | -10.528 | -150.454 | 1.00 | 2.00 | CARP |
| ATOM | 6484 | C2  | BGLC | 10 | 9.955  | -12.198 | -151.016 | 1.00 | 2.00 | CARP |
| ATOM | 6485 | H2  | BGLC | 10 | 9.179  | -13.030 | -151.014 | 1.00 | 0.00 | CARP |
| ATOM | 6486 | O2  | BGLC | 10 | 11.178 | -12.776 | -150.573 | 1.00 | 2.00 | CARP |
| ATOM | 6487 | HO2 | BGLC | 10 | 11.249 | -13.725 | -150.626 | 1.00 | 0.00 | CARP |
| ATOM | 6488 | C3  | BGLC | 10 | 10.103 | -11.595 | -152.397 | 1.00 | 2.00 | CARP |
| ATOM | 6489 | H3  | BGLC | 10 | 10.769 | -10.733 | -152.395 | 1.00 | 0.00 | CARP |
| ATOM | 6490 | O3  | BGLC | 10 | 10.536 | -12.618 | -153.273 | 1.00 | 2.00 | CARP |
| ATOM | 6491 | HO3 | BGLC | 10 | 11.415 | -12.960 | -153.222 | 1.00 | 0.00 | CARP |
| ATOM | 6492 | C4  | BGLC | 10 | 8.749  | -10.998 | -152.803 | 1.00 | 2.00 | CARP |
| ATOM | 6493 | H4  | BGLC | 10 | 7.985  | -11.766 | -152.876 | 1.00 | 0.00 | CARP |
| ATOM | 6494 | O4  | BGLC | 10 | 8.708  | -10.456 | -154.087 | 1.00 | 2.00 | CARP |
| ATOM | 6495 | C6  | BGLC | 10 | 6.840  | -9.533  | -152.026 | 1.00 | 2.00 | CARP |
| ATOM | 6496 | H61 | BGLC | 10 | 6.396  | -10.461 | -152.533 | 1.00 | 0.00 | CARP |
| ATOM | 6497 | H62 | BGLC | 10 | 6.186  | -9.370  | -151.175 | 1.00 | 0.00 | CARP |
| ATOM | 6498 | O6  | BGLC | 10 | 6.778  | -8.531  | -153.021 | 1.00 | 2.00 | CARP |
| ATOM | 6499 | HO6 | BGLC | 10 | 7.291  | -7.737  | -152.906 | 1.00 | 0.00 | CARP |
| ATOM | 6500 | C1  | BGLC | 11 | 8.544  | -10.974 | -155.223 | 1.00 | 2.00 | CARP |
| ATOM | 6501 | H1  | BGLC | 11 | 7.742  | -11.702 | -155.212 | 1.00 | 0.00 | CARP |
| ATOM | 6502 | C5  | BGLC | 11 | 9.713  | -12.150 | -156.939 | 1.00 | 2.00 | CARP |
| ATOM | 6503 | H5  | BGLC | 11 | 9.013  | -13.010 | -156.981 | 1.00 | 0.00 | CARP |
| ATOM | 6504 | O5  | BGLC | 11 | 9.743  | -11.584 | -155.642 | 1.00 | 2.00 | CARP |
| ATOM | 6505 | C2  | BGLC | 11 | 8.067  | -9.914  | -156.210 | 1.00 | 2.00 | CARP |
| ATOM | 6506 | H2  | BGLC | 11 | 8.841  | -9.081  | -156.213 | 1.00 | 0.00 | CARP |
| ATOM | 6507 | O2  | BGLC | 11 | 6.845  | -9.337  | -155.768 | 1.00 | 2.00 | CARP |
| ATOM | 6508 | HO2 | BGLC | 11 | 6.773  | -8.389  | -155.823 | 1.00 | 0.00 | CARP |
| ATOM | 6509 | C3  | BGLC | 11 | 7.919  | -10.524 | -157.588 | 1.00 | 2.00 | CARP |
| ATOM | 6510 | H3  | BGLC | 11 | 7.252  | -11.386 | -157.582 | 1.00 | 0.00 | CARP |
| ATOM | 6511 | O3  | BGLC | 11 | 7.485  | -9.503  | -158.468 | 1.00 | 2.00 | CARP |
| ATOM | 6512 | HO3 | BGLC | 11 | 6.606  | -9.161  | -158.418 | 1.00 | 0.00 | CARP |
| ATOM | 6513 | C4  | BGLC | 11 | 9.272  | -11.124 | -157.993 | 1.00 | 2.00 | CARP |
| ATOM | 6514 | H4  | BGLC | 11 | 10.035 | -10.355 | -158.070 | 1.00 | 0.00 | CARP |
| ATOM | 6515 | O4  | BGLC | 11 | 9.313  | -11.671 | -159.274 | 1.00 | 2.00 | CARP |
| ATOM | 6516 | C6  | BGLC | 11 | 11.184 | -12.584 | -157.212 | 1.00 | 2.00 | CARP |
| ATOM | 6517 | H61 | BGLC | 11 | 11.628 | -11.659 | -157.723 | 1.00 | 0.00 | CARP |
| ATOM | 6518 | H62 | BGLC | 11 | 11.838 | -12.743 | -156.361 | 1.00 | 0.00 | CARP |
| ATOM | 6519 | O6  | BGLC | 11 | 11.244 | -13.590 | -158.203 | 1.00 | 2.00 | CARP |
| ATOM | 6520 | HO6 | BGLC | 11 | 10.731 | -14.383 | -158.084 | 1.00 | 0.00 | CARP |
| ATOM | 6521 | C1  | BGLC | 12 | 9.475  | -11.157 | -160.413 | 1.00 | 2.00 | CARP |
| ATOM | 6522 | H1  | BGLC | 12 | 10.277 | -10.428 | -160.406 | 1.00 | 0.00 | CARP |
| ATOM | 6523 | C5  | BGLC | 12 | 8.305  | -9.986  | -162.133 | 1.00 | 2.00 | CARP |
| ATOM | 6524 | H5  | BGLC | 12 | 9.004  | -9.126  | -162.179 | 1.00 | 0.00 | CARP |
| ATOM | 6525 | O5  | BGLC | 12 | 8.277  | -10.549 | -160.833 | 1.00 | 2.00 | CARP |
| ATOM | 6526 | C2  | BGLC | 12 | 9.951  | -12.220 | -161.396 | 1.00 | 2.00 | CARP |
| ATOM | 6527 | H2  | BGLC | 12 | 9.176  | -13.052 | -161.394 | 1.00 | 0.00 | CARP |
| ATOM | 6528 | O2  | BGLC | 12 | 11.174 | -12.797 | -160.953 | 1.00 | 2.00 | CARP |
| ATOM | 6529 | HO2 | BGLC | 12 | 11.245 | -13.746 | -161.005 | 1.00 | 0.00 | CARP |
| ATOM | 6530 | C3  | BGLC | 12 | 10.098 | -11.616 | -162.777 | 1.00 | 2.00 | CARP |
| ATOM | 6531 | H3  | BGLC | 12 | 10.764 | -10.754 | -162.775 | 1.00 | 0.00 | CARP |
| ATOM | 6532 | O3  | BGLC | 12 | 10.532 | -12.640 | -163.653 | 1.00 | 2.00 | CARP |

|      |      |     |      |    |        |         |          |      |      |      |
|------|------|-----|------|----|--------|---------|----------|------|------|------|
| ATOM | 6533 | HO3 | BGLC | 12 | 11.411 | -12.981 | -163.602 | 1.00 | 0.00 | CARP |
| ATOM | 6534 | C4  | BGLC | 12 | 8.745  | -11.019 | -163.183 | 1.00 | 2.00 | CARP |
| ATOM | 6535 | H4  | BGLC | 12 | 7.981  | -11.787 | -163.256 | 1.00 | 0.00 | CARP |
| ATOM | 6536 | O4  | BGLC | 12 | 8.705  | -10.477 | -164.467 | 1.00 | 2.00 | CARP |
| ATOM | 6537 | C6  | BGLC | 12 | 6.835  | -9.553  | -162.406 | 1.00 | 2.00 | CARP |
| ATOM | 6538 | H61 | BGLC | 12 | 6.390  | -10.481 | -162.912 | 1.00 | 0.00 | CARP |
| ATOM | 6539 | H62 | BGLC | 12 | 6.182  | -9.390  | -161.555 | 1.00 | 0.00 | CARP |
| ATOM | 6540 | O6  | BGLC | 12 | 6.774  | -8.552  | -163.401 | 1.00 | 2.00 | CARP |
| ATOM | 6541 | HO6 | BGLC | 12 | 7.288  | -7.759  | -163.286 | 1.00 | 0.00 | CARP |
| ATOM | 6542 | C1  | BGLC | 13 | 8.540  | -10.993 | -165.603 | 1.00 | 2.00 | CARP |
| ATOM | 6543 | H1  | BGLC | 13 | 7.737  | -11.720 | -165.593 | 1.00 | 0.00 | CARP |
| ATOM | 6544 | C5  | BGLC | 13 | 9.708  | -12.170 | -167.319 | 1.00 | 2.00 | CARP |
| ATOM | 6545 | H5  | BGLC | 13 | 9.008  | -13.029 | -167.361 | 1.00 | 0.00 | CARP |
| ATOM | 6546 | O5  | BGLC | 13 | 9.738  | -11.604 | -166.022 | 1.00 | 2.00 | CARP |
| ATOM | 6547 | C2  | BGLC | 13 | 8.063  | -9.936  | -166.590 | 1.00 | 2.00 | CARP |
| ATOM | 6548 | H2  | BGLC | 13 | 8.839  | -9.104  | -166.592 | 1.00 | 0.00 | CARP |
| ATOM | 6549 | O2  | BGLC | 13 | 6.840  | -9.357  | -166.148 | 1.00 | 2.00 | CARP |
| ATOM | 6550 | HO2 | BGLC | 13 | 6.768  | -8.409  | -166.205 | 1.00 | 0.00 | CARP |
| ATOM | 6551 | C3  | BGLC | 13 | 7.915  | -10.544 | -167.968 | 1.00 | 2.00 | CARP |
| ATOM | 6552 | H3  | BGLC | 13 | 7.248  | -11.405 | -167.962 | 1.00 | 0.00 | CARP |
| ATOM | 6553 | O3  | BGLC | 13 | 7.480  | -9.523  | -168.848 | 1.00 | 2.00 | CARP |
| ATOM | 6554 | HO3 | BGLC | 13 | 6.601  | -9.182  | -168.797 | 1.00 | 0.00 | CARP |
| ATOM | 6555 | C4  | BGLC | 13 | 9.268  | -11.145 | -168.373 | 1.00 | 2.00 | CARP |
| ATOM | 6556 | H4  | BGLC | 13 | 10.031 | -10.377 | -168.450 | 1.00 | 0.00 | CARP |
| ATOM | 6557 | O4  | BGLC | 13 | 9.309  | -11.692 | -169.654 | 1.00 | 2.00 | CARP |
| ATOM | 6558 | C6  | BGLC | 13 | 11.179 | -12.605 | -167.592 | 1.00 | 2.00 | CARP |
| ATOM | 6559 | O61 | BGLC | 13 | 11.271 | -13.998 | -167.828 | 1.00 | 0.00 | CARP |
| ATOM | 6560 | O62 | BGLC | 13 | 11.822 | -11.721 | -167.539 | 1.00 | 0.00 | CARP |
| ATOM | 6561 | C1  | BGLC | 14 | 9.470  | -11.177 | -170.793 | 1.00 | 2.00 | CARP |
| ATOM | 6562 | H1  | BGLC | 14 | 10.272 | -10.448 | -170.786 | 1.00 | 0.00 | CARP |
| ATOM | 6563 | C5  | BGLC | 14 | 8.301  | -10.007 | -172.513 | 1.00 | 2.00 | CARP |
| ATOM | 6564 | H5  | BGLC | 14 | 9.000  | -9.147  | -172.559 | 1.00 | 0.00 | CARP |
| ATOM | 6565 | O5  | BGLC | 14 | 8.274  | -10.569 | -171.213 | 1.00 | 2.00 | CARP |
| ATOM | 6566 | C2  | BGLC | 14 | 9.946  | -12.240 | -171.776 | 1.00 | 2.00 | CARP |
| ATOM | 6567 | H2  | BGLC | 14 | 9.170  | -13.072 | -171.774 | 1.00 | 0.00 | CARP |
| ATOM | 6568 | O2  | BGLC | 14 | 11.169 | -12.818 | -171.333 | 1.00 | 2.00 | CARP |
| ATOM | 6569 | HO2 | BGLC | 14 | 11.240 | -13.767 | -171.386 | 1.00 | 0.00 | CARP |
| ATOM | 6570 | C3  | BGLC | 14 | 10.094 | -11.637 | -173.157 | 1.00 | 2.00 | CARP |
| ATOM | 6571 | H3  | BGLC | 14 | 10.760 | -10.775 | -173.155 | 1.00 | 0.00 | CARP |
| ATOM | 6572 | O3  | BGLC | 14 | 10.527 | -12.660 | -174.033 | 1.00 | 2.00 | CARP |
| ATOM | 6573 | HO3 | BGLC | 14 | 11.406 | -13.002 | -173.982 | 1.00 | 0.00 | CARP |
| ATOM | 6574 | C4  | BGLC | 14 | 8.740  | -11.039 | -173.563 | 1.00 | 2.00 | CARP |
| ATOM | 6575 | H4  | BGLC | 14 | 7.976  | -11.807 | -173.636 | 1.00 | 0.00 | CARP |
| ATOM | 6576 | O4  | BGLC | 14 | 8.700  | -10.498 | -174.847 | 1.00 | 2.00 | CARP |
| ATOM | 6577 | C6  | BGLC | 14 | 6.830  | -9.575  | -172.786 | 1.00 | 2.00 | CARP |
| ATOM | 6578 | H61 | BGLC | 14 | 6.386  | -10.502 | -173.294 | 1.00 | 0.00 | CARP |
| ATOM | 6579 | H62 | BGLC | 14 | 6.176  | -9.413  | -171.935 | 1.00 | 0.00 | CARP |
| ATOM | 6580 | O6  | BGLC | 14 | 6.770  | -8.572  | -173.781 | 1.00 | 2.00 | CARP |
| ATOM | 6581 | HO6 | BGLC | 14 | 7.284  | -7.779  | -173.665 | 1.00 | 0.00 | CARP |
| ATOM | 6582 | C1  | BGLC | 15 | 8.535  | -11.015 | -175.983 | 1.00 | 2.00 | CARP |
| ATOM | 6583 | H1  | BGLC | 15 | 7.732  | -11.742 | -175.972 | 1.00 | 0.00 | CARP |
| ATOM | 6584 | C5  | BGLC | 15 | 9.704  | -12.190 | -177.699 | 1.00 | 2.00 | CARP |
| ATOM | 6585 | H5  | BGLC | 15 | 9.004  | -13.049 | -177.743 | 1.00 | 0.00 | CARP |
| ATOM | 6586 | O5  | BGLC | 15 | 9.733  | -11.626 | -176.402 | 1.00 | 2.00 | CARP |

|      |      |     |      |    |        |         |          |      |      |      |
|------|------|-----|------|----|--------|---------|----------|------|------|------|
| ATOM | 6587 | C2  | BGLC | 15 | 8.059  | -9.955  | -176.970 | 1.00 | 2.00 | CARP |
| ATOM | 6588 | H2  | BGLC | 15 | 8.834  | -9.122  | -176.973 | 1.00 | 0.00 | CARP |
| ATOM | 6589 | O2  | BGLC | 15 | 6.836  | -9.377  | -176.528 | 1.00 | 2.00 | CARP |
| ATOM | 6590 | HO2 | BGLC | 15 | 6.764  | -8.429  | -176.583 | 1.00 | 0.00 | CARP |
| ATOM | 6591 | C3  | BGLC | 15 | 7.910  | -10.565 | -178.348 | 1.00 | 2.00 | CARP |
| ATOM | 6592 | H3  | BGLC | 15 | 7.244  | -11.427 | -178.341 | 1.00 | 0.00 | CARP |
| ATOM | 6593 | O3  | BGLC | 15 | 7.475  | -9.545  | -179.228 | 1.00 | 2.00 | CARP |
| ATOM | 6594 | HO3 | BGLC | 15 | 6.596  | -9.204  | -179.177 | 1.00 | 0.00 | CARP |
| ATOM | 6595 | C4  | BGLC | 15 | 9.263  | -11.165 | -178.753 | 1.00 | 2.00 | CARP |
| ATOM | 6596 | H4  | BGLC | 15 | 10.026 | -10.396 | -178.830 | 1.00 | 0.00 | CARP |
| ATOM | 6597 | O4  | BGLC | 15 | 9.304  | -11.713 | -180.034 | 1.00 | 2.00 | CARP |
| ATOM | 6598 | C6  | BGLC | 15 | 11.176 | -12.625 | -177.972 | 1.00 | 2.00 | CARP |
| ATOM | 6599 | H61 | BGLC | 15 | 11.621 | -11.700 | -178.484 | 1.00 | 0.00 | CARP |
| ATOM | 6600 | H62 | BGLC | 15 | 11.830 | -12.784 | -177.121 | 1.00 | 0.00 | CARP |
| ATOM | 6601 | O6  | BGLC | 15 | 11.235 | -13.632 | -178.963 | 1.00 | 2.00 | CARP |
| ATOM | 6602 | HO6 | BGLC | 15 | 10.721 | -14.424 | -178.843 | 1.00 | 0.00 | CARP |
| ATOM | 6603 | C1  | BGLC | 16 | 9.465  | -11.198 | -181.173 | 1.00 | 2.00 | CARP |
| ATOM | 6604 | H1  | BGLC | 16 | 10.267 | -10.469 | -181.166 | 1.00 | 0.00 | CARP |
| ATOM | 6605 | C5  | BGLC | 16 | 8.297  | -10.028 | -182.893 | 1.00 | 2.00 | CARP |
| ATOM | 6606 | H5  | BGLC | 16 | 8.996  | -9.168  | -182.938 | 1.00 | 0.00 | CARP |
| ATOM | 6607 | O5  | BGLC | 16 | 8.269  | -10.591 | -181.593 | 1.00 | 2.00 | CARP |
| ATOM | 6608 | C2  | BGLC | 16 | 9.942  | -12.261 | -182.156 | 1.00 | 2.00 | CARP |
| ATOM | 6609 | H2  | BGLC | 16 | 9.167  | -13.093 | -182.155 | 1.00 | 0.00 | CARP |
| ATOM | 6610 | O2  | BGLC | 16 | 11.165 | -12.838 | -181.713 | 1.00 | 2.00 | CARP |
| ATOM | 6611 | HO2 | BGLC | 16 | 11.237 | -13.787 | -181.766 | 1.00 | 0.00 | CARP |
| ATOM | 6612 | C3  | BGLC | 16 | 10.090 | -11.657 | -183.537 | 1.00 | 2.00 | CARP |
| ATOM | 6613 | H3  | BGLC | 16 | 10.756 | -10.795 | -183.536 | 1.00 | 0.00 | CARP |
| ATOM | 6614 | O3  | BGLC | 16 | 10.523 | -12.681 | -184.413 | 1.00 | 2.00 | CARP |
| ATOM | 6615 | HO3 | BGLC | 16 | 11.402 | -13.023 | -184.362 | 1.00 | 0.00 | CARP |
| ATOM | 6616 | C4  | BGLC | 16 | 8.735  | -11.060 | -183.943 | 1.00 | 2.00 | CARP |
| ATOM | 6617 | H4  | BGLC | 16 | 7.970  | -11.827 | -184.017 | 1.00 | 0.00 | CARP |
| ATOM | 6618 | O4  | BGLC | 16 | 8.696  | -10.519 | -185.227 | 1.00 | 2.00 | CARP |
| ATOM | 6619 | C6  | BGLC | 16 | 6.826  | -9.595  | -183.166 | 1.00 | 2.00 | CARP |
| ATOM | 6620 | H61 | BGLC | 16 | 6.381  | -10.522 | -183.673 | 1.00 | 0.00 | CARP |
| ATOM | 6621 | H62 | BGLC | 16 | 6.173  | -9.432  | -182.315 | 1.00 | 0.00 | CARP |
| ATOM | 6622 | O6  | BGLC | 16 | 6.766  | -8.593  | -184.161 | 1.00 | 2.00 | CARP |
| ATOM | 6623 | HO6 | BGLC | 16 | 7.280  | -7.800  | -184.045 | 1.00 | 0.00 | CARP |
| ATOM | 6624 | C1  | BGLC | 17 | 8.530  | -11.036 | -186.363 | 1.00 | 2.00 | CARP |
| ATOM | 6625 | H1  | BGLC | 17 | 7.727  | -11.764 | -186.351 | 1.00 | 0.00 | CARP |
| ATOM | 6626 | C5  | BGLC | 17 | 9.700  | -12.212 | -188.079 | 1.00 | 2.00 | CARP |
| ATOM | 6627 | H5  | BGLC | 17 | 9.000  | -13.072 | -188.122 | 1.00 | 0.00 | CARP |
| ATOM | 6628 | O5  | BGLC | 17 | 9.728  | -11.646 | -186.782 | 1.00 | 2.00 | CARP |
| ATOM | 6629 | C2  | BGLC | 17 | 8.054  | -9.977  | -187.350 | 1.00 | 2.00 | CARP |
| ATOM | 6630 | H2  | BGLC | 17 | 8.829  | -9.145  | -187.352 | 1.00 | 0.00 | CARP |
| ATOM | 6631 | O2  | BGLC | 17 | 6.831  | -9.398  | -186.908 | 1.00 | 2.00 | CARP |
| ATOM | 6632 | HO2 | BGLC | 17 | 6.760  | -8.450  | -186.964 | 1.00 | 0.00 | CARP |
| ATOM | 6633 | C3  | BGLC | 17 | 7.906  | -10.586 | -188.728 | 1.00 | 2.00 | CARP |
| ATOM | 6634 | H3  | BGLC | 17 | 7.240  | -11.448 | -188.722 | 1.00 | 0.00 | CARP |
| ATOM | 6635 | O3  | BGLC | 17 | 7.471  | -9.566  | -189.608 | 1.00 | 2.00 | CARP |
| ATOM | 6636 | HO3 | BGLC | 17 | 6.592  | -9.225  | -189.558 | 1.00 | 0.00 | CARP |
| ATOM | 6637 | C4  | BGLC | 17 | 9.260  | -11.186 | -189.133 | 1.00 | 2.00 | CARP |
| ATOM | 6638 | H4  | BGLC | 17 | 10.024 | -10.418 | -189.211 | 1.00 | 0.00 | CARP |
| ATOM | 6639 | O4  | BGLC | 17 | 9.300  | -11.734 | -190.414 | 1.00 | 2.00 | CARP |
| ATOM | 6640 | C6  | BGLC | 17 | 11.171 | -12.647 | -188.352 | 1.00 | 2.00 | CARP |

|      |      |     |      |    |        |         |          |      |      |      |
|------|------|-----|------|----|--------|---------|----------|------|------|------|
| ATOM | 6641 | H61 | BGLC | 17 | 11.616 | -11.722 | -188.863 | 1.00 | 0.00 | CARP |
| ATOM | 6642 | H62 | BGLC | 17 | 11.825 | -12.807 | -187.501 | 1.00 | 0.00 | CARP |
| ATOM | 6643 | O6  | BGLC | 17 | 11.230 | -13.652 | -189.343 | 1.00 | 2.00 | CARP |
| ATOM | 6644 | HO6 | BGLC | 17 | 10.716 | -14.444 | -189.224 | 1.00 | 0.00 | CARP |
| ATOM | 6645 | C1  | BGLC | 18 | 9.462  | -11.220 | -191.553 | 1.00 | 2.00 | CARP |
| ATOM | 6646 | H1  | BGLC | 18 | 10.264 | -10.492 | -191.546 | 1.00 | 0.00 | CARP |
| ATOM | 6647 | C5  | BGLC | 18 | 8.292  | -10.049 | -193.273 | 1.00 | 2.00 | CARP |
| ATOM | 6648 | H5  | BGLC | 18 | 8.991  | -9.189  | -193.319 | 1.00 | 0.00 | CARP |
| ATOM | 6649 | O5  | BGLC | 18 | 8.265  | -10.612 | -191.973 | 1.00 | 2.00 | CARP |
| ATOM | 6650 | C2  | BGLC | 18 | 9.938  | -12.281 | -192.536 | 1.00 | 2.00 | CARP |
| ATOM | 6651 | H2  | BGLC | 18 | 9.162  | -13.112 | -192.533 | 1.00 | 0.00 | CARP |
| ATOM | 6652 | O2  | BGLC | 18 | 11.161 | -12.859 | -192.093 | 1.00 | 2.00 | CARP |
| ATOM | 6653 | HO2 | BGLC | 18 | 11.232 | -13.808 | -192.147 | 1.00 | 0.00 | CARP |
| ATOM | 6654 | C3  | BGLC | 18 | 10.085 | -11.679 | -193.917 | 1.00 | 2.00 | CARP |
| ATOM | 6655 | H3  | BGLC | 18 | 10.752 | -10.817 | -193.915 | 1.00 | 0.00 | CARP |
| ATOM | 6656 | O3  | BGLC | 18 | 10.518 | -12.702 | -194.793 | 1.00 | 2.00 | CARP |
| ATOM | 6657 | HO3 | BGLC | 18 | 11.397 | -13.043 | -194.742 | 1.00 | 0.00 | CARP |
| ATOM | 6658 | C4  | BGLC | 18 | 8.731  | -11.080 | -194.323 | 1.00 | 2.00 | CARP |
| ATOM | 6659 | H4  | BGLC | 18 | 7.967  | -11.848 | -194.397 | 1.00 | 0.00 | CARP |
| ATOM | 6660 | O4  | BGLC | 18 | 8.691  | -10.539 | -195.607 | 1.00 | 2.00 | CARP |
| ATOM | 6661 | C6  | BGLC | 18 | 6.821  | -9.616  | -193.546 | 1.00 | 2.00 | CARP |
| ATOM | 6662 | H61 | BGLC | 18 | 6.376  | -10.543 | -194.053 | 1.00 | 0.00 | CARP |
| ATOM | 6663 | H62 | BGLC | 18 | 6.168  | -9.453  | -192.695 | 1.00 | 0.00 | CARP |
| ATOM | 6664 | O6  | BGLC | 18 | 6.761  | -8.614  | -194.541 | 1.00 | 2.00 | CARP |
| ATOM | 6665 | HO6 | BGLC | 18 | 7.275  | -7.821  | -194.425 | 1.00 | 0.00 | CARP |
| ATOM | 6666 | C1  | BGLC | 19 | 8.526  | -11.057 | -196.743 | 1.00 | 2.00 | CARP |
| ATOM | 6667 | H1  | BGLC | 19 | 7.723  | -11.785 | -196.731 | 1.00 | 0.00 | CARP |
| ATOM | 6668 | C5  | BGLC | 19 | 9.695  | -12.232 | -198.459 | 1.00 | 2.00 | CARP |
| ATOM | 6669 | H5  | BGLC | 19 | 8.995  | -13.091 | -198.503 | 1.00 | 0.00 | CARP |
| ATOM | 6670 | O5  | BGLC | 19 | 9.723  | -11.667 | -197.162 | 1.00 | 2.00 | CARP |
| ATOM | 6671 | C2  | BGLC | 19 | 8.049  | -9.998  | -197.730 | 1.00 | 2.00 | CARP |
| ATOM | 6672 | H2  | BGLC | 19 | 8.825  | -9.166  | -197.732 | 1.00 | 0.00 | CARP |
| ATOM | 6673 | O2  | BGLC | 19 | 6.828  | -9.419  | -197.288 | 1.00 | 2.00 | CARP |
| ATOM | 6674 | HO2 | BGLC | 19 | 6.757  | -8.471  | -197.344 | 1.00 | 0.00 | CARP |
| ATOM | 6675 | C3  | BGLC | 19 | 7.901  | -10.607 | -199.108 | 1.00 | 2.00 | CARP |
| ATOM | 6676 | H3  | BGLC | 19 | 7.235  | -11.469 | -199.103 | 1.00 | 0.00 | CARP |
| ATOM | 6677 | O3  | BGLC | 19 | 7.466  | -9.586  | -199.988 | 1.00 | 2.00 | CARP |
| ATOM | 6678 | HO3 | BGLC | 19 | 6.587  | -9.245  | -199.937 | 1.00 | 0.00 | CARP |
| ATOM | 6679 | C4  | BGLC | 19 | 9.255  | -11.206 | -199.513 | 1.00 | 2.00 | CARP |
| ATOM | 6680 | H4  | BGLC | 19 | 10.018 | -10.438 | -199.590 | 1.00 | 0.00 | CARP |
| ATOM | 6681 | O4  | BGLC | 19 | 9.296  | -11.754 | -200.794 | 1.00 | 2.00 | CARP |
| ATOM | 6682 | C6  | BGLC | 19 | 11.166 | -12.668 | -198.732 | 1.00 | 2.00 | CARP |
| ATOM | 6683 | H61 | BGLC | 19 | 11.611 | -11.742 | -199.242 | 1.00 | 0.00 | CARP |
| ATOM | 6684 | H62 | BGLC | 19 | 11.820 | -12.829 | -197.881 | 1.00 | 0.00 | CARP |
| ATOM | 6685 | O6  | BGLC | 19 | 11.227 | -13.673 | -199.723 | 1.00 | 2.00 | CARP |
| ATOM | 6686 | HO6 | BGLC | 19 | 10.713 | -14.466 | -199.605 | 1.00 | 0.00 | CARP |
| ATOM | 6687 | C1  | BGLC | 20 | 9.457  | -11.240 | -201.933 | 1.00 | 2.00 | CARP |
| ATOM | 6688 | H1  | BGLC | 20 | 10.259 | -10.511 | -201.927 | 1.00 | 0.00 | CARP |
| ATOM | 6689 | C5  | BGLC | 20 | 8.287  | -10.069 | -203.653 | 1.00 | 2.00 | CARP |
| ATOM | 6690 | H5  | BGLC | 20 | 8.986  | -9.209  | -203.699 | 1.00 | 0.00 | CARP |
| ATOM | 6691 | O5  | BGLC | 20 | 8.260  | -10.632 | -202.353 | 1.00 | 2.00 | CARP |
| ATOM | 6692 | C2  | BGLC | 20 | 9.933  | -12.302 | -202.916 | 1.00 | 2.00 | CARP |
| ATOM | 6693 | H2  | BGLC | 20 | 9.157  | -13.133 | -202.914 | 1.00 | 0.00 | CARP |
| ATOM | 6694 | O2  | BGLC | 20 | 11.156 | -12.880 | -202.473 | 1.00 | 2.00 | CARP |

|      |      |     |      |    |         |         |          |      |      |      |
|------|------|-----|------|----|---------|---------|----------|------|------|------|
| ATOM | 6695 | HO2 | BGLC | 20 | 11.227  | -13.829 | -202.526 | 1.00 | 0.00 | CARP |
| ATOM | 6696 | C3  | BGLC | 20 | 10.081  | -11.700 | -204.297 | 1.00 | 2.00 | CARP |
| ATOM | 6697 | H3  | BGLC | 20 | 10.747  | -10.838 | -204.295 | 1.00 | 0.00 | CARP |
| ATOM | 6698 | O3  | BGLC | 20 | 10.513  | -12.722 | -205.173 | 1.00 | 2.00 | CARP |
| ATOM | 6699 | HO3 | BGLC | 20 | 11.392  | -13.064 | -205.122 | 1.00 | 0.00 | CARP |
| ATOM | 6700 | C4  | BGLC | 20 | 8.726   | -11.101 | -204.703 | 1.00 | 2.00 | CARP |
| ATOM | 6701 | H4  | BGLC | 20 | 7.898   | -11.778 | -204.892 | 1.00 | 0.00 | CARP |
| ATOM | 6702 | O4  | BGLC | 20 | 8.844   | -10.365 | -205.930 | 1.00 | 2.00 | CARP |
| ATOM | 6703 | HO4 | BGLC | 20 | 9.341   | -10.909 | -206.592 | 1.00 | 0.00 | CARP |
| ATOM | 6704 | C6  | BGLC | 20 | 6.817   | -9.636  | -203.926 | 1.00 | 2.00 | CARP |
| ATOM | 6705 | H61 | BGLC | 20 | 6.372   | -10.563 | -204.433 | 1.00 | 0.00 | CARP |
| ATOM | 6706 | H62 | BGLC | 20 | 6.164   | -9.473  | -203.075 | 1.00 | 0.00 | CARP |
| ATOM | 6707 | O6  | BGLC | 20 | 6.756   | -8.634  | -204.921 | 1.00 | 2.00 | CARP |
| ATOM | 6708 | HO6 | BGLC | 20 | 7.270   | -7.841  | -204.806 | 1.00 | 0.00 | CARP |
| ATOM | 6709 | C1  | BGLC | 1  | -9.346  | -4.734  | -103.327 | 1.00 | 2.00 | CARQ |
| ATOM | 6710 | H1  | BGLC | 1  | -10.189 | -5.406  | -103.218 | 1.00 | 0.00 | CARQ |
| ATOM | 6711 | O1  | BGLC | 1  | -9.024  | -4.022  | -102.135 | 1.00 | 2.00 | CARQ |
| ATOM | 6712 | HO1 | BGLC | 1  | -8.517  | -3.284  | -102.396 | 1.00 | 0.00 | CARQ |
| ATOM | 6713 | C5  | BGLC | 1  | -8.178  | -5.910  | -105.044 | 1.00 | 2.00 | CARQ |
| ATOM | 6714 | H5  | BGLC | 1  | -8.878  | -6.770  | -105.086 | 1.00 | 0.00 | CARQ |
| ATOM | 6715 | O5  | BGLC | 1  | -8.149  | -5.343  | -103.747 | 1.00 | 2.00 | CARQ |
| ATOM | 6716 | C2  | BGLC | 1  | -9.824  | -3.675  | -104.314 | 1.00 | 2.00 | CARQ |
| ATOM | 6717 | H2  | BGLC | 1  | -9.049  | -2.843  | -104.316 | 1.00 | 0.00 | CARQ |
| ATOM | 6718 | O2  | BGLC | 1  | -11.046 | -3.097  | -103.873 | 1.00 | 2.00 | CARQ |
| ATOM | 6719 | HO2 | BGLC | 1  | -11.118 | -2.149  | -103.929 | 1.00 | 0.00 | CARQ |
| ATOM | 6720 | C3  | BGLC | 1  | -9.972  | -4.284  | -105.693 | 1.00 | 2.00 | CARQ |
| ATOM | 6721 | H3  | BGLC | 1  | -10.639 | -5.146  | -105.687 | 1.00 | 0.00 | CARQ |
| ATOM | 6722 | O3  | BGLC | 1  | -10.406 | -3.264  | -106.573 | 1.00 | 2.00 | CARQ |
| ATOM | 6723 | HO3 | BGLC | 1  | -11.285 | -2.923  | -106.523 | 1.00 | 0.00 | CARQ |
| ATOM | 6724 | C4  | BGLC | 1  | -8.619  | -4.884  | -106.097 | 1.00 | 2.00 | CARQ |
| ATOM | 6725 | H4  | BGLC | 1  | -7.856  | -4.116  | -106.174 | 1.00 | 0.00 | CARQ |
| ATOM | 6726 | O4  | BGLC | 1  | -8.580  | -5.429  | -107.379 | 1.00 | 2.00 | CARQ |
| ATOM | 6727 | C6  | BGLC | 1  | -6.708  | -6.344  | -105.316 | 1.00 | 2.00 | CARQ |
| ATOM | 6728 | H61 | BGLC | 1  | -6.263  | -5.419  | -105.827 | 1.00 | 0.00 | CARQ |
| ATOM | 6729 | H62 | BGLC | 1  | -6.054  | -6.503  | -104.465 | 1.00 | 0.00 | CARQ |
| ATOM | 6730 | O6  | BGLC | 1  | -6.648  | -7.350  | -106.307 | 1.00 | 2.00 | CARQ |
| ATOM | 6731 | HO6 | BGLC | 1  | -7.162  | -8.143  | -106.188 | 1.00 | 0.00 | CARQ |
| ATOM | 6732 | C1  | BGLC | 2  | -8.416  | -4.917  | -108.517 | 1.00 | 2.00 | CARQ |
| ATOM | 6733 | H1  | BGLC | 2  | -7.613  | -4.189  | -108.510 | 1.00 | 0.00 | CARQ |
| ATOM | 6734 | C5  | BGLC | 2  | -9.586  | -3.746  | -110.237 | 1.00 | 2.00 | CARQ |
| ATOM | 6735 | H5  | BGLC | 2  | -8.887  | -2.886  | -110.282 | 1.00 | 0.00 | CARQ |
| ATOM | 6736 | O5  | BGLC | 2  | -9.614  | -4.309  | -108.938 | 1.00 | 2.00 | CARQ |
| ATOM | 6737 | C2  | BGLC | 2  | -7.939  | -5.979  | -109.501 | 1.00 | 2.00 | CARQ |
| ATOM | 6738 | H2  | BGLC | 2  | -8.715  | -6.811  | -109.499 | 1.00 | 0.00 | CARQ |
| ATOM | 6739 | O2  | BGLC | 2  | -6.718  | -6.556  | -109.058 | 1.00 | 2.00 | CARQ |
| ATOM | 6740 | HO2 | BGLC | 2  | -6.647  | -7.505  | -109.112 | 1.00 | 0.00 | CARQ |
| ATOM | 6741 | C3  | BGLC | 2  | -7.792  | -5.375  | -110.882 | 1.00 | 2.00 | CARQ |
| ATOM | 6742 | H3  | BGLC | 2  | -7.126  | -4.513  | -110.882 | 1.00 | 0.00 | CARQ |
| ATOM | 6743 | O3  | BGLC | 2  | -7.360  | -6.399  | -111.758 | 1.00 | 2.00 | CARQ |
| ATOM | 6744 | HO3 | BGLC | 2  | -6.482  | -6.741  | -111.707 | 1.00 | 0.00 | CARQ |
| ATOM | 6745 | C4  | BGLC | 2  | -9.146  | -4.778  | -111.287 | 1.00 | 2.00 | CARQ |
| ATOM | 6746 | H4  | BGLC | 2  | -9.909  | -5.547  | -111.360 | 1.00 | 0.00 | CARQ |
| ATOM | 6747 | O4  | BGLC | 2  | -9.188  | -4.237  | -112.571 | 1.00 | 2.00 | CARQ |
| ATOM | 6748 | C6  | BGLC | 2  | -11.058 | -3.314  | -110.511 | 1.00 | 2.00 | CARQ |

|      |      |          |   |         |                |      |      |      |
|------|------|----------|---|---------|----------------|------|------|------|
| ATOM | 6749 | H61 BGLC | 2 | -11.502 | -4.241-111.019 | 1.00 | 0.00 | CARQ |
| ATOM | 6750 | H62 BGLC | 2 | -11.712 | -3.152-109.660 | 1.00 | 0.00 | CARQ |
| ATOM | 6751 | O6 BGLC  | 2 | -11.118 | -2.312-111.506 | 1.00 | 2.00 | CARQ |
| ATOM | 6752 | HO6 BGLC | 2 | -10.605 | -1.519-111.390 | 1.00 | 0.00 | CARQ |
| ATOM | 6753 | C1 BGLC  | 3 | -9.351  | -4.755-113.707 | 1.00 | 2.00 | CARQ |
| ATOM | 6754 | H1 BGLC  | 3 | -10.152 | -5.485-113.696 | 1.00 | 0.00 | CARQ |
| ATOM | 6755 | C5 BGLC  | 3 | -8.183  | -5.931-115.424 | 1.00 | 2.00 | CARQ |
| ATOM | 6756 | H5 BGLC  | 3 | -8.882  | -6.791-115.465 | 1.00 | 0.00 | CARQ |
| ATOM | 6757 | O5 BGLC  | 3 | -8.154  | -5.363-114.127 | 1.00 | 2.00 | CARQ |
| ATOM | 6758 | C2 BGLC  | 3 | -9.827  | -3.695-114.694 | 1.00 | 2.00 | CARQ |
| ATOM | 6759 | H2 BGLC  | 3 | -9.052  | -2.862-114.697 | 1.00 | 0.00 | CARQ |
| ATOM | 6760 | O2 BGLC  | 3 | -11.050 | -3.118-114.253 | 1.00 | 2.00 | CARQ |
| ATOM | 6761 | HO2 BGLC | 3 | -11.122 | -2.170-114.308 | 1.00 | 0.00 | CARQ |
| ATOM | 6762 | C3 BGLC  | 3 | -9.977  | -4.304-116.073 | 1.00 | 2.00 | CARQ |
| ATOM | 6763 | H3 BGLC  | 3 | -10.643 | -5.166-116.067 | 1.00 | 0.00 | CARQ |
| ATOM | 6764 | O3 BGLC  | 3 | -10.411 | -3.285-116.953 | 1.00 | 2.00 | CARQ |
| ATOM | 6765 | HO3 BGLC | 3 | -11.290 | -2.943-116.902 | 1.00 | 0.00 | CARQ |
| ATOM | 6766 | C4 BGLC  | 3 | -8.623  | -4.904-116.477 | 1.00 | 2.00 | CARQ |
| ATOM | 6767 | H4 BGLC  | 3 | -7.859  | -4.137-116.555 | 1.00 | 0.00 | CARQ |
| ATOM | 6768 | O4 BGLC  | 3 | -8.585  | -5.450-117.759 | 1.00 | 2.00 | CARQ |
| ATOM | 6769 | C6 BGLC  | 3 | -6.711  | -6.365-115.696 | 1.00 | 2.00 | CARQ |
| ATOM | 6770 | H61 BGLC | 3 | -6.266  | -5.440-116.208 | 1.00 | 0.00 | CARQ |
| ATOM | 6771 | H62 BGLC | 3 | -6.057  | -6.524-114.844 | 1.00 | 0.00 | CARQ |
| ATOM | 6772 | O6 BGLC  | 3 | -6.652  | -7.371-116.687 | 1.00 | 2.00 | CARQ |
| ATOM | 6773 | HO6 BGLC | 3 | -7.166  | -8.164-116.568 | 1.00 | 0.00 | CARQ |
| ATOM | 6774 | C1 BGLC  | 4 | -8.421  | -4.938-118.897 | 1.00 | 2.00 | CARQ |
| ATOM | 6775 | H1 BGLC  | 4 | -7.618  | -4.210-118.890 | 1.00 | 0.00 | CARQ |
| ATOM | 6776 | C5 BGLC  | 4 | -9.590  | -3.767-120.617 | 1.00 | 2.00 | CARQ |
| ATOM | 6777 | H5 BGLC  | 4 | -8.891  | -2.907-120.663 | 1.00 | 0.00 | CARQ |
| ATOM | 6778 | O5 BGLC  | 4 | -9.617  | -4.330-119.318 | 1.00 | 2.00 | CARQ |
| ATOM | 6779 | C2 BGLC  | 4 | -7.944  | -6.000-119.881 | 1.00 | 2.00 | CARQ |
| ATOM | 6780 | H2 BGLC  | 4 | -8.720  | -6.832-119.879 | 1.00 | 0.00 | CARQ |
| ATOM | 6781 | O2 BGLC  | 4 | -6.722  | -6.578-119.438 | 1.00 | 2.00 | CARQ |
| ATOM | 6782 | HO2 BGLC | 4 | -6.651  | -7.527-119.492 | 1.00 | 0.00 | CARQ |
| ATOM | 6783 | C3 BGLC  | 4 | -7.797  | -5.396-121.262 | 1.00 | 2.00 | CARQ |
| ATOM | 6784 | H3 BGLC  | 4 | -7.131  | -4.534-121.261 | 1.00 | 0.00 | CARQ |
| ATOM | 6785 | O3 BGLC  | 4 | -7.363  | -6.420-122.138 | 1.00 | 2.00 | CARQ |
| ATOM | 6786 | HO3 BGLC | 4 | -6.484  | -6.761-122.087 | 1.00 | 0.00 | CARQ |
| ATOM | 6787 | C4 BGLC  | 4 | -9.151  | -4.798-121.667 | 1.00 | 2.00 | CARQ |
| ATOM | 6788 | H4 BGLC  | 4 | -9.915  | -5.566-121.740 | 1.00 | 0.00 | CARQ |
| ATOM | 6789 | O4 BGLC  | 4 | -9.192  | -4.257-122.951 | 1.00 | 2.00 | CARQ |
| ATOM | 6790 | C6 BGLC  | 4 | -11.061 | -3.334-120.891 | 1.00 | 2.00 | CARQ |
| ATOM | 6791 | H61 BGLC | 4 | -11.505 | -4.261-121.399 | 1.00 | 0.00 | CARQ |
| ATOM | 6792 | H62 BGLC | 4 | -11.715 | -3.172-120.040 | 1.00 | 0.00 | CARQ |
| ATOM | 6793 | O6 BGLC  | 4 | -11.121 | -2.332-121.885 | 1.00 | 2.00 | CARQ |
| ATOM | 6794 | HO6 BGLC | 4 | -10.607 | -1.539-121.769 | 1.00 | 0.00 | CARQ |
| ATOM | 6795 | C1 BGLC  | 5 | -9.356  | -4.775-124.087 | 1.00 | 2.00 | CARQ |
| ATOM | 6796 | H1 BGLC  | 5 | -10.158 | -5.503-124.076 | 1.00 | 0.00 | CARQ |
| ATOM | 6797 | C5 BGLC  | 5 | -8.187  | -5.952-125.804 | 1.00 | 2.00 | CARQ |
| ATOM | 6798 | H5 BGLC  | 5 | -8.885  | -6.813-125.846 | 1.00 | 0.00 | CARQ |
| ATOM | 6799 | O5 BGLC  | 5 | -8.159  | -5.385-124.507 | 1.00 | 2.00 | CARQ |
| ATOM | 6800 | C2 BGLC  | 5 | -9.832  | -3.717-125.074 | 1.00 | 2.00 | CARQ |
| ATOM | 6801 | H2 BGLC  | 5 | -9.056  | -2.885-125.075 | 1.00 | 0.00 | CARQ |
| ATOM | 6802 | O2 BGLC  | 5 | -11.055 | -3.138-124.633 | 1.00 | 2.00 | CARQ |

|      |      |     |      |   |         |        |          |      |      |      |
|------|------|-----|------|---|---------|--------|----------|------|------|------|
| ATOM | 6803 | HO2 | BGLC | 5 | -11.126 | -2.190 | -124.690 | 1.00 | 0.00 | CARQ |
| ATOM | 6804 | C3  | BGLC | 5 | -9.980  | -4.325 | -126.453 | 1.00 | 2.00 | CARQ |
| ATOM | 6805 | H3  | BGLC | 5 | -10.646 | -5.187 | -126.447 | 1.00 | 0.00 | CARQ |
| ATOM | 6806 | O3  | BGLC | 5 | -10.415 | -3.304 | -127.333 | 1.00 | 2.00 | CARQ |
| ATOM | 6807 | HO3 | BGLC | 5 | -11.294 | -2.963 | -127.282 | 1.00 | 0.00 | CARQ |
| ATOM | 6808 | C4  | BGLC | 5 | -8.628  | -4.924 | -126.857 | 1.00 | 2.00 | CARQ |
| ATOM | 6809 | H4  | BGLC | 5 | -7.864  | -4.156 | -126.934 | 1.00 | 0.00 | CARQ |
| ATOM | 6810 | O4  | BGLC | 5 | -8.589  | -5.472 | -128.139 | 1.00 | 2.00 | CARQ |
| ATOM | 6811 | C6  | BGLC | 5 | -6.715  | -6.384 | -126.076 | 1.00 | 2.00 | CARQ |
| ATOM | 6812 | H61 | BGLC | 5 | -6.271  | -5.460 | -126.590 | 1.00 | 0.00 | CARQ |
| ATOM | 6813 | H62 | BGLC | 5 | -6.061  | -6.541 | -125.225 | 1.00 | 0.00 | CARQ |
| ATOM | 6814 | O6  | BGLC | 5 | -6.657  | -7.392 | -127.067 | 1.00 | 2.00 | CARQ |
| ATOM | 6815 | HO6 | BGLC | 5 | -7.171  | -8.185 | -126.946 | 1.00 | 0.00 | CARQ |
| ATOM | 6816 | C1  | BGLC | 6 | -8.424  | -4.958 | -129.277 | 1.00 | 2.00 | CARQ |
| ATOM | 6817 | H1  | BGLC | 6 | -7.622  | -4.230 | -129.268 | 1.00 | 0.00 | CARQ |
| ATOM | 6818 | C5  | BGLC | 6 | -9.594  | -3.789 | -130.997 | 1.00 | 2.00 | CARQ |
| ATOM | 6819 | H5  | BGLC | 6 | -8.894  | -2.930 | -131.044 | 1.00 | 0.00 | CARQ |
| ATOM | 6820 | O5  | BGLC | 6 | -9.622  | -4.350 | -129.698 | 1.00 | 2.00 | CARQ |
| ATOM | 6821 | C2  | BGLC | 6 | -7.949  | -6.020 | -130.260 | 1.00 | 2.00 | CARQ |
| ATOM | 6822 | H2  | BGLC | 6 | -8.726  | -6.851 | -130.258 | 1.00 | 0.00 | CARQ |
| ATOM | 6823 | O2  | BGLC | 6 | -6.726  | -6.599 | -129.818 | 1.00 | 2.00 | CARQ |
| ATOM | 6824 | HO2 | BGLC | 6 | -6.656  | -7.548 | -129.871 | 1.00 | 0.00 | CARQ |
| ATOM | 6825 | C3  | BGLC | 6 | -7.801  | -5.416 | -131.642 | 1.00 | 2.00 | CARQ |
| ATOM | 6826 | H3  | BGLC | 6 | -7.135  | -4.554 | -131.641 | 1.00 | 0.00 | CARQ |
| ATOM | 6827 | O3  | BGLC | 6 | -7.367  | -6.441 | -132.518 | 1.00 | 2.00 | CARQ |
| ATOM | 6828 | HO3 | BGLC | 6 | -6.488  | -6.782 | -132.466 | 1.00 | 0.00 | CARQ |
| ATOM | 6829 | C4  | BGLC | 6 | -9.155  | -4.819 | -132.047 | 1.00 | 2.00 | CARQ |
| ATOM | 6830 | H4  | BGLC | 6 | -9.918  | -5.588 | -132.120 | 1.00 | 0.00 | CARQ |
| ATOM | 6831 | O4  | BGLC | 6 | -9.197  | -4.278 | -133.331 | 1.00 | 2.00 | CARQ |
| ATOM | 6832 | C6  | BGLC | 6 | -11.066 | -3.355 | -131.270 | 1.00 | 2.00 | CARQ |
| ATOM | 6833 | O61 | BGLC | 6 | -11.159 | -1.963 | -131.512 | 1.00 | 0.00 | CARQ |
| ATOM | 6834 | O62 | BGLC | 6 | -11.709 | -4.239 | -131.212 | 1.00 | 0.00 | CARQ |
| ATOM | 6835 | C1  | BGLC | 7 | -9.360  | -4.795 | -134.467 | 1.00 | 2.00 | CARQ |
| ATOM | 6836 | H1  | BGLC | 7 | -10.162 | -5.523 | -134.457 | 1.00 | 0.00 | CARQ |
| ATOM | 6837 | C5  | BGLC | 7 | -8.191  | -5.972 | -136.184 | 1.00 | 2.00 | CARQ |
| ATOM | 6838 | H5  | BGLC | 7 | -8.890  | -6.832 | -136.226 | 1.00 | 0.00 | CARQ |
| ATOM | 6839 | O5  | BGLC | 7 | -8.163  | -5.405 | -134.887 | 1.00 | 2.00 | CARQ |
| ATOM | 6840 | C2  | BGLC | 7 | -9.837  | -3.737 | -135.454 | 1.00 | 2.00 | CARQ |
| ATOM | 6841 | H2  | BGLC | 7 | -9.061  | -2.905 | -135.455 | 1.00 | 0.00 | CARQ |
| ATOM | 6842 | O2  | BGLC | 7 | -11.059 | -3.159 | -135.013 | 1.00 | 2.00 | CARQ |
| ATOM | 6843 | HO2 | BGLC | 7 | -11.131 | -2.211 | -135.070 | 1.00 | 0.00 | CARQ |
| ATOM | 6844 | C3  | BGLC | 7 | -9.985  | -4.345 | -136.833 | 1.00 | 2.00 | CARQ |
| ATOM | 6845 | H3  | BGLC | 7 | -10.651 | -5.207 | -136.827 | 1.00 | 0.00 | CARQ |
| ATOM | 6846 | O3  | BGLC | 7 | -10.419 | -3.326 | -137.713 | 1.00 | 2.00 | CARQ |
| ATOM | 6847 | HO3 | BGLC | 7 | -11.298 | -2.985 | -137.663 | 1.00 | 0.00 | CARQ |
| ATOM | 6848 | C4  | BGLC | 7 | -8.632  | -4.945 | -137.237 | 1.00 | 2.00 | CARQ |
| ATOM | 6849 | H4  | BGLC | 7 | -7.869  | -4.177 | -137.314 | 1.00 | 0.00 | CARQ |
| ATOM | 6850 | O4  | BGLC | 7 | -8.592  | -5.492 | -138.519 | 1.00 | 2.00 | CARQ |
| ATOM | 6851 | C6  | BGLC | 7 | -6.720  | -6.406 | -136.456 | 1.00 | 2.00 | CARQ |
| ATOM | 6852 | H61 | BGLC | 7 | -6.275  | -5.482 | -136.969 | 1.00 | 0.00 | CARQ |
| ATOM | 6853 | H62 | BGLC | 7 | -6.066  | -6.565 | -135.605 | 1.00 | 0.00 | CARQ |
| ATOM | 6854 | O6  | BGLC | 7 | -6.662  | -7.413 | -137.447 | 1.00 | 2.00 | CARQ |
| ATOM | 6855 | HO6 | BGLC | 7 | -7.176  | -8.205 | -137.327 | 1.00 | 0.00 | CARQ |
| ATOM | 6856 | C1  | BGLC | 8 | -8.429  | -4.979 | -139.657 | 1.00 | 2.00 | CARQ |

|      |      |     |      |    |         |                |      |      |      |
|------|------|-----|------|----|---------|----------------|------|------|------|
| ATOM | 6857 | H1  | BGLC | 8  | -7.627  | -4.250-139.649 | 1.00 | 0.00 | CARQ |
| ATOM | 6858 | C5  | BGLC | 8  | -9.598  | -3.808-141.377 | 1.00 | 2.00 | CARQ |
| ATOM | 6859 | H5  | BGLC | 8  | -8.899  | -2.948-141.421 | 1.00 | 0.00 | CARQ |
| ATOM | 6860 | O5  | BGLC | 8  | -9.627  | -4.372-140.078 | 1.00 | 2.00 | CARQ |
| ATOM | 6861 | C2  | BGLC | 8  | -7.954  | -6.041-140.640 | 1.00 | 2.00 | CARQ |
| ATOM | 6862 | H2  | BGLC | 8  | -8.730  | -6.872-140.638 | 1.00 | 0.00 | CARQ |
| ATOM | 6863 | O2  | BGLC | 8  | -6.730  | -6.619-140.198 | 1.00 | 2.00 | CARQ |
| ATOM | 6864 | HO2 | BGLC | 8  | -6.659  | -7.568-140.251 | 1.00 | 0.00 | CARQ |
| ATOM | 6865 | C3  | BGLC | 8  | -7.806  | -5.438-142.022 | 1.00 | 2.00 | CARQ |
| ATOM | 6866 | H3  | BGLC | 8  | -7.140  | -4.576-142.020 | 1.00 | 0.00 | CARQ |
| ATOM | 6867 | O3  | BGLC | 8  | -7.372  | -6.462-142.898 | 1.00 | 2.00 | CARQ |
| ATOM | 6868 | HO3 | BGLC | 8  | -6.493  | -6.803-142.847 | 1.00 | 0.00 | CARQ |
| ATOM | 6869 | C4  | BGLC | 8  | -9.159  | -4.840-142.427 | 1.00 | 2.00 | CARQ |
| ATOM | 6870 | H4  | BGLC | 8  | -9.922  | -5.609-142.499 | 1.00 | 0.00 | CARQ |
| ATOM | 6871 | O4  | BGLC | 8  | -9.202  | -4.299-143.711 | 1.00 | 2.00 | CARQ |
| ATOM | 6872 | C6  | BGLC | 8  | -11.070 | -3.376-141.650 | 1.00 | 2.00 | CARQ |
| ATOM | 6873 | H61 | BGLC | 8  | -11.514 | -4.303-142.157 | 1.00 | 0.00 | CARQ |
| ATOM | 6874 | H62 | BGLC | 8  | -11.723 | -3.214-140.799 | 1.00 | 0.00 | CARQ |
| ATOM | 6875 | O6  | BGLC | 8  | -11.131 | -2.374-142.645 | 1.00 | 2.00 | CARQ |
| ATOM | 6876 | HO6 | BGLC | 8  | -10.618 | -1.580-142.529 | 1.00 | 0.00 | CARQ |
| ATOM | 6877 | C1  | BGLC | 9  | -9.365  | -4.817-144.847 | 1.00 | 2.00 | CARQ |
| ATOM | 6878 | H1  | BGLC | 9  | -10.166 | -5.546-144.836 | 1.00 | 0.00 | CARQ |
| ATOM | 6879 | C5  | BGLC | 9  | -8.196  | -5.993-146.563 | 1.00 | 2.00 | CARQ |
| ATOM | 6880 | H5  | BGLC | 9  | -8.896  | -6.853-146.604 | 1.00 | 0.00 | CARQ |
| ATOM | 6881 | O5  | BGLC | 9  | -8.166  | -5.426-145.267 | 1.00 | 2.00 | CARQ |
| ATOM | 6882 | C2  | BGLC | 9  | -9.841  | -3.757-145.834 | 1.00 | 2.00 | CARQ |
| ATOM | 6883 | H2  | BGLC | 9  | -9.066  | -2.924-145.836 | 1.00 | 0.00 | CARQ |
| ATOM | 6884 | O2  | BGLC | 9  | -11.064 | -3.180-145.393 | 1.00 | 2.00 | CARQ |
| ATOM | 6885 | HO2 | BGLC | 9  | -11.136 | -2.232-145.448 | 1.00 | 0.00 | CARQ |
| ATOM | 6886 | C3  | BGLC | 9  | -9.990  | -4.366-147.213 | 1.00 | 2.00 | CARQ |
| ATOM | 6887 | H3  | BGLC | 9  | -10.656 | -5.228-147.207 | 1.00 | 0.00 | CARQ |
| ATOM | 6888 | O3  | BGLC | 9  | -10.423 | -3.347-148.093 | 1.00 | 2.00 | CARQ |
| ATOM | 6889 | HO3 | BGLC | 9  | -11.302 | -3.005-148.043 | 1.00 | 0.00 | CARQ |
| ATOM | 6890 | C4  | BGLC | 9  | -8.637  | -4.965-147.617 | 1.00 | 2.00 | CARQ |
| ATOM | 6891 | H4  | BGLC | 9  | -7.873  | -4.197-147.695 | 1.00 | 0.00 | CARQ |
| ATOM | 6892 | O4  | BGLC | 9  | -8.598  | -5.513-148.899 | 1.00 | 2.00 | CARQ |
| ATOM | 6893 | C6  | BGLC | 9  | -6.725  | -6.427-146.836 | 1.00 | 2.00 | CARQ |
| ATOM | 6894 | H61 | BGLC | 9  | -6.281  | -5.502-147.348 | 1.00 | 0.00 | CARQ |
| ATOM | 6895 | H62 | BGLC | 9  | -6.070  | -6.586-145.985 | 1.00 | 0.00 | CARQ |
| ATOM | 6896 | O6  | BGLC | 9  | -6.666  | -7.434-147.827 | 1.00 | 2.00 | CARQ |
| ATOM | 6897 | HO6 | BGLC | 9  | -7.180  | -8.227-147.707 | 1.00 | 0.00 | CARQ |
| ATOM | 6898 | C1  | BGLC | 10 | -8.433  | -4.999-150.037 | 1.00 | 2.00 | CARQ |
| ATOM | 6899 | H1  | BGLC | 10 | -7.632  | -4.270-150.027 | 1.00 | 0.00 | CARQ |
| ATOM | 6900 | C5  | BGLC | 10 | -9.603  | -3.830-151.757 | 1.00 | 2.00 | CARQ |
| ATOM | 6901 | H5  | BGLC | 10 | -8.903  | -2.971-151.802 | 1.00 | 0.00 | CARQ |
| ATOM | 6902 | O5  | BGLC | 10 | -9.632  | -4.393-150.458 | 1.00 | 2.00 | CARQ |
| ATOM | 6903 | C2  | BGLC | 10 | -7.958  | -6.061-151.020 | 1.00 | 2.00 | CARQ |
| ATOM | 6904 | H2  | BGLC | 10 | -8.735  | -6.892-151.017 | 1.00 | 0.00 | CARQ |
| ATOM | 6905 | O2  | BGLC | 10 | -6.735  | -6.639-150.578 | 1.00 | 2.00 | CARQ |
| ATOM | 6906 | HO2 | BGLC | 10 | -6.664  | -7.588-150.631 | 1.00 | 0.00 | CARQ |
| ATOM | 6907 | C3  | BGLC | 10 | -7.811  | -5.459-152.402 | 1.00 | 2.00 | CARQ |
| ATOM | 6908 | H3  | BGLC | 10 | -7.145  | -4.597-152.400 | 1.00 | 0.00 | CARQ |
| ATOM | 6909 | O3  | BGLC | 10 | -7.377  | -6.483-153.278 | 1.00 | 2.00 | CARQ |
| ATOM | 6910 | HO3 | BGLC | 10 | -6.498  | -6.824-153.227 | 1.00 | 0.00 | CARQ |



|      |      |     |      |    |         |                |      |      |      |
|------|------|-----|------|----|---------|----------------|------|------|------|
| ATOM | 6911 | C4  | BGLC | 10 | -9.164  | -4.861-152.807 | 1.00 | 2.00 | CARQ |
| ATOM | 6912 | H4  | BGLC | 10 | -9.927  | -5.630-152.880 | 1.00 | 0.00 | CARQ |
| ATOM | 6913 | O4  | BGLC | 10 | -9.206  | -4.320-154.091 | 1.00 | 2.00 | CARQ |
| ATOM | 6914 | C6  | BGLC | 10 | -11.075 | -3.396-152.030 | 1.00 | 2.00 | CARQ |
| ATOM | 6915 | O61 | BGLC | 10 | -11.168 | -2.004-152.273 | 1.00 | 0.00 | CARQ |
| ATOM | 6916 | O62 | BGLC | 10 | -11.718 | -4.279-151.972 | 1.00 | 0.00 | CARQ |
| ATOM | 6917 | C1  | BGLC | 11 | -9.368  | -4.837-155.227 | 1.00 | 2.00 | CARQ |
| ATOM | 6918 | H1  | BGLC | 11 | -10.170 | -5.566-155.218 | 1.00 | 0.00 | CARQ |
| ATOM | 6919 | C5  | BGLC | 11 | -8.201  | -6.013-156.943 | 1.00 | 2.00 | CARQ |
| ATOM | 6920 | H5  | BGLC | 11 | -8.901  | -6.873-156.985 | 1.00 | 0.00 | CARQ |
| ATOM | 6921 | O5  | BGLC | 11 | -8.171  | -5.447-155.647 | 1.00 | 2.00 | CARQ |
| ATOM | 6922 | C2  | BGLC | 11 | -9.846  | -3.777-156.214 | 1.00 | 2.00 | CARQ |
| ATOM | 6923 | H2  | BGLC | 11 | -9.072  | -2.944-156.217 | 1.00 | 0.00 | CARQ |
| ATOM | 6924 | O2  | BGLC | 11 | -11.069 | -3.200-155.773 | 1.00 | 2.00 | CARQ |
| ATOM | 6925 | HO2 | BGLC | 11 | -11.141 | -2.252-155.829 | 1.00 | 0.00 | CARQ |
| ATOM | 6926 | C3  | BGLC | 11 | -9.994  | -4.388-157.593 | 1.00 | 2.00 | CARQ |
| ATOM | 6927 | H3  | BGLC | 11 | -10.660 | -5.250-157.588 | 1.00 | 0.00 | CARQ |
| ATOM | 6928 | O3  | BGLC | 11 | -10.428 | -3.367-158.473 | 1.00 | 2.00 | CARQ |
| ATOM | 6929 | HO3 | BGLC | 11 | -11.307 | -3.025-158.423 | 1.00 | 0.00 | CARQ |
| ATOM | 6930 | C4  | BGLC | 11 | -8.642  | -4.987-157.997 | 1.00 | 2.00 | CARQ |
| ATOM | 6931 | H4  | BGLC | 11 | -7.879  | -4.219-158.075 | 1.00 | 0.00 | CARQ |
| ATOM | 6932 | O4  | BGLC | 11 | -8.603  | -5.534-159.279 | 1.00 | 2.00 | CARQ |
| ATOM | 6933 | C6  | BGLC | 11 | -6.730  | -6.447-157.216 | 1.00 | 2.00 | CARQ |
| ATOM | 6934 | H61 | BGLC | 11 | -6.286  | -5.522-157.728 | 1.00 | 0.00 | CARQ |
| ATOM | 6935 | H62 | BGLC | 11 | -6.075  | -6.606-156.365 | 1.00 | 0.00 | CARQ |
| ATOM | 6936 | O6  | BGLC | 11 | -6.671  | -7.454-158.207 | 1.00 | 2.00 | CARQ |
| ATOM | 6937 | HO6 | BGLC | 11 | -7.185  | -8.247-158.087 | 1.00 | 0.00 | CARQ |
| ATOM | 6938 | C1  | BGLC | 12 | -8.438  | -5.021-160.417 | 1.00 | 2.00 | CARQ |
| ATOM | 6939 | H1  | BGLC | 12 | -7.635  | -4.293-160.408 | 1.00 | 0.00 | CARQ |
| ATOM | 6940 | C5  | BGLC | 12 | -9.607  | -3.850-162.137 | 1.00 | 2.00 | CARQ |
| ATOM | 6941 | H5  | BGLC | 12 | -8.908  | -2.990-162.182 | 1.00 | 0.00 | CARQ |
| ATOM | 6942 | O5  | BGLC | 12 | -9.636  | -4.413-160.838 | 1.00 | 2.00 | CARQ |
| ATOM | 6943 | C2  | BGLC | 12 | -7.962  | -6.083-161.400 | 1.00 | 2.00 | CARQ |
| ATOM | 6944 | H2  | BGLC | 12 | -8.738  | -6.915-161.397 | 1.00 | 0.00 | CARQ |
| ATOM | 6945 | O2  | BGLC | 12 | -6.740  | -6.660-160.958 | 1.00 | 2.00 | CARQ |
| ATOM | 6946 | HO2 | BGLC | 12 | -6.669  | -7.609-161.011 | 1.00 | 0.00 | CARQ |
| ATOM | 6947 | C3  | BGLC | 12 | -7.816  | -5.479-162.782 | 1.00 | 2.00 | CARQ |
| ATOM | 6948 | H3  | BGLC | 12 | -7.151  | -4.616-162.781 | 1.00 | 0.00 | CARQ |
| ATOM | 6949 | O3  | BGLC | 12 | -7.381  | -6.503-163.658 | 1.00 | 2.00 | CARQ |
| ATOM | 6950 | HO3 | BGLC | 12 | -6.502  | -6.843-163.607 | 1.00 | 0.00 | CARQ |
| ATOM | 6951 | C4  | BGLC | 12 | -9.169  | -4.883-163.187 | 1.00 | 2.00 | CARQ |
| ATOM | 6952 | H4  | BGLC | 12 | -9.934  | -5.650-163.260 | 1.00 | 0.00 | CARQ |
| ATOM | 6953 | O4  | BGLC | 12 | -9.210  | -4.340-164.471 | 1.00 | 2.00 | CARQ |
| ATOM | 6954 | C6  | BGLC | 12 | -11.080 | -3.417-162.410 | 1.00 | 2.00 | CARQ |
| ATOM | 6955 | H61 | BGLC | 12 | -11.525 | -4.344-162.918 | 1.00 | 0.00 | CARQ |
| ATOM | 6956 | H62 | BGLC | 12 | -11.733 | -3.254-161.559 | 1.00 | 0.00 | CARQ |
| ATOM | 6957 | O6  | BGLC | 12 | -11.140 | -2.415-163.405 | 1.00 | 2.00 | CARQ |
| ATOM | 6958 | HO6 | BGLC | 12 | -10.626 | -1.622-163.289 | 1.00 | 0.00 | CARQ |
| ATOM | 6959 | C1  | BGLC | 13 | -9.373  | -4.859-165.607 | 1.00 | 2.00 | CARQ |
| ATOM | 6960 | H1  | BGLC | 13 | -10.174 | -5.589-165.595 | 1.00 | 0.00 | CARQ |
| ATOM | 6961 | C5  | BGLC | 13 | -8.205  | -6.035-167.323 | 1.00 | 2.00 | CARQ |
| ATOM | 6962 | H5  | BGLC | 13 | -8.904  | -6.896-167.364 | 1.00 | 0.00 | CARQ |
| ATOM | 6963 | O5  | BGLC | 13 | -8.176  | -5.467-166.027 | 1.00 | 2.00 | CARQ |
| ATOM | 6964 | C2  | BGLC | 13 | -9.849  | -3.799-166.594 | 1.00 | 2.00 | CARQ |

|      |      |     |      |    |         |        |          |      |      |      |
|------|------|-----|------|----|---------|--------|----------|------|------|------|
| ATOM | 6965 | H2  | BGLC | 13 | -9.074  | -2.967 | -166.596 | 1.00 | 0.00 | CARQ |
| ATOM | 6966 | O2  | BGLC | 13 | -11.073 | -3.221 | -166.153 | 1.00 | 2.00 | CARQ |
| ATOM | 6967 | HO2 | BGLC | 13 | -11.145 | -2.273 | -166.208 | 1.00 | 0.00 | CARQ |
| ATOM | 6968 | C3  | BGLC | 13 | -9.998  | -4.408 | -167.973 | 1.00 | 2.00 | CARQ |
| ATOM | 6969 | H3  | BGLC | 13 | -10.665 | -5.270 | -167.966 | 1.00 | 0.00 | CARQ |
| ATOM | 6970 | O3  | BGLC | 13 | -10.433 | -3.388 | -168.853 | 1.00 | 2.00 | CARQ |
| ATOM | 6971 | HO3 | BGLC | 13 | -11.312 | -3.047 | -168.802 | 1.00 | 0.00 | CARQ |
| ATOM | 6972 | C4  | BGLC | 13 | -8.647  | -5.008 | -168.377 | 1.00 | 2.00 | CARQ |
| ATOM | 6973 | H4  | BGLC | 13 | -7.884  | -4.239 | -168.454 | 1.00 | 0.00 | CARQ |
| ATOM | 6974 | O4  | BGLC | 13 | -8.607  | -5.555 | -169.659 | 1.00 | 2.00 | CARQ |
| ATOM | 6975 | C6  | BGLC | 13 | -6.734  | -6.468 | -167.596 | 1.00 | 2.00 | CARQ |
| ATOM | 6976 | H61 | BGLC | 13 | -6.291  | -5.543 | -168.108 | 1.00 | 0.00 | CARQ |
| ATOM | 6977 | H62 | BGLC | 13 | -6.079  | -6.626 | -166.745 | 1.00 | 0.00 | CARQ |
| ATOM | 6978 | O6  | BGLC | 13 | -6.674  | -7.475 | -168.587 | 1.00 | 2.00 | CARQ |
| ATOM | 6979 | HO6 | BGLC | 13 | -7.187  | -8.268 | -168.467 | 1.00 | 0.00 | CARQ |
| ATOM | 6980 | C1  | BGLC | 14 | -8.443  | -5.042 | -170.797 | 1.00 | 2.00 | CARQ |
| ATOM | 6981 | H1  | BGLC | 14 | -7.641  | -4.314 | -170.789 | 1.00 | 0.00 | CARQ |
| ATOM | 6982 | C5  | BGLC | 14 | -9.612  | -3.871 | -172.517 | 1.00 | 2.00 | CARQ |
| ATOM | 6983 | H5  | BGLC | 14 | -8.912  | -3.011 | -172.562 | 1.00 | 0.00 | CARQ |
| ATOM | 6984 | O5  | BGLC | 14 | -9.641  | -4.434 | -171.218 | 1.00 | 2.00 | CARQ |
| ATOM | 6985 | C2  | BGLC | 14 | -7.967  | -6.103 | -171.780 | 1.00 | 2.00 | CARQ |
| ATOM | 6986 | H2  | BGLC | 14 | -8.743  | -6.935 | -171.778 | 1.00 | 0.00 | CARQ |
| ATOM | 6987 | O2  | BGLC | 14 | -6.744  | -6.681 | -171.338 | 1.00 | 2.00 | CARQ |
| ATOM | 6988 | HO2 | BGLC | 14 | -6.673  | -7.630 | -171.392 | 1.00 | 0.00 | CARQ |
| ATOM | 6989 | C3  | BGLC | 14 | -7.820  | -5.499 | -173.162 | 1.00 | 2.00 | CARQ |
| ATOM | 6990 | H3  | BGLC | 14 | -7.154  | -4.637 | -173.161 | 1.00 | 0.00 | CARQ |
| ATOM | 6991 | O3  | BGLC | 14 | -7.385  | -6.524 | -174.038 | 1.00 | 2.00 | CARQ |
| ATOM | 6992 | HO3 | BGLC | 14 | -6.506  | -6.864 | -173.986 | 1.00 | 0.00 | CARQ |
| ATOM | 6993 | C4  | BGLC | 14 | -9.173  | -4.902 | -173.567 | 1.00 | 2.00 | CARQ |
| ATOM | 6994 | H4  | BGLC | 14 | -9.937  | -5.670 | -173.640 | 1.00 | 0.00 | CARQ |
| ATOM | 6995 | O4  | BGLC | 14 | -9.214  | -4.361 | -174.851 | 1.00 | 2.00 | CARQ |
| ATOM | 6996 | C6  | BGLC | 14 | -11.083 | -3.438 | -172.790 | 1.00 | 2.00 | CARQ |
| ATOM | 6997 | O61 | BGLC | 14 | -11.176 | -2.046 | -173.033 | 1.00 | 0.00 | CARQ |
| ATOM | 6998 | O62 | BGLC | 14 | -11.726 | -4.322 | -172.732 | 1.00 | 0.00 | CARQ |
| ATOM | 6999 | C1  | BGLC | 15 | -9.378  | -4.879 | -175.987 | 1.00 | 2.00 | CARQ |
| ATOM | 7000 | H1  | BGLC | 15 | -10.180 | -5.607 | -175.976 | 1.00 | 0.00 | CARQ |
| ATOM | 7001 | C5  | BGLC | 15 | -8.210  | -6.056 | -177.703 | 1.00 | 2.00 | CARQ |
| ATOM | 7002 | H5  | BGLC | 15 | -8.909  | -6.916 | -177.744 | 1.00 | 0.00 | CARQ |
| ATOM | 7003 | O5  | BGLC | 15 | -8.181  | -5.489 | -176.407 | 1.00 | 2.00 | CARQ |
| ATOM | 7004 | C2  | BGLC | 15 | -9.854  | -3.820 | -176.974 | 1.00 | 2.00 | CARQ |
| ATOM | 7005 | H2  | BGLC | 15 | -9.078  | -2.988 | -176.976 | 1.00 | 0.00 | CARQ |
| ATOM | 7006 | O2  | BGLC | 15 | -11.078 | -3.241 | -176.533 | 1.00 | 2.00 | CARQ |
| ATOM | 7007 | HO2 | BGLC | 15 | -11.150 | -2.293 | -176.589 | 1.00 | 0.00 | CARQ |
| ATOM | 7008 | C3  | BGLC | 15 | -10.003 | -4.428 | -178.353 | 1.00 | 2.00 | CARQ |
| ATOM | 7009 | H3  | BGLC | 15 | -10.670 | -5.290 | -178.347 | 1.00 | 0.00 | CARQ |
| ATOM | 7010 | O3  | BGLC | 15 | -10.437 | -3.408 | -179.233 | 1.00 | 2.00 | CARQ |
| ATOM | 7011 | HO3 | BGLC | 15 | -11.316 | -3.066 | -179.183 | 1.00 | 0.00 | CARQ |
| ATOM | 7012 | C4  | BGLC | 15 | -8.650  | -5.028 | -178.757 | 1.00 | 2.00 | CARQ |
| ATOM | 7013 | H4  | BGLC | 15 | -7.886  | -4.261 | -178.834 | 1.00 | 0.00 | CARQ |
| ATOM | 7014 | O4  | BGLC | 15 | -8.610  | -5.576 | -180.039 | 1.00 | 2.00 | CARQ |
| ATOM | 7015 | C6  | BGLC | 15 | -6.738  | -6.489 | -177.976 | 1.00 | 2.00 | CARQ |
| ATOM | 7016 | H61 | BGLC | 15 | -6.294  | -5.564 | -178.488 | 1.00 | 0.00 | CARQ |
| ATOM | 7017 | H62 | BGLC | 15 | -6.083  | -6.648 | -177.125 | 1.00 | 0.00 | CARQ |
| ATOM | 7018 | O6  | BGLC | 15 | -6.679  | -7.495 | -178.967 | 1.00 | 2.00 | CARQ |

|      |      |     |      |    |         |                |      |      |      |
|------|------|-----|------|----|---------|----------------|------|------|------|
| ATOM | 7019 | HO6 | BGLC | 15 | -7.192  | -8.288-178.847 | 1.00 | 0.00 | CARQ |
| ATOM | 7020 | C1  | BGLC | 16 | -8.448  | -5.062-181.177 | 1.00 | 2.00 | CARQ |
| ATOM | 7021 | H1  | BGLC | 16 | -7.646  | -4.334-181.170 | 1.00 | 0.00 | CARQ |
| ATOM | 7022 | C5  | BGLC | 16 | -9.616  | -3.893-182.897 | 1.00 | 2.00 | CARQ |
| ATOM | 7023 | H5  | BGLC | 16 | -8.915  | -3.035-182.944 | 1.00 | 0.00 | CARQ |
| ATOM | 7024 | O5  | BGLC | 16 | -9.645  | -4.453-181.598 | 1.00 | 2.00 | CARQ |
| ATOM | 7025 | C2  | BGLC | 16 | -7.972  | -6.124-182.160 | 1.00 | 2.00 | CARQ |
| ATOM | 7026 | H2  | BGLC | 16 | -8.748  | -6.955-182.159 | 1.00 | 0.00 | CARQ |
| ATOM | 7027 | O2  | BGLC | 16 | -6.749  | -6.702-181.718 | 1.00 | 2.00 | CARQ |
| ATOM | 7028 | HO2 | BGLC | 16 | -6.678  | -7.651-181.771 | 1.00 | 0.00 | CARQ |
| ATOM | 7029 | C3  | BGLC | 16 | -7.823  | -5.520-183.542 | 1.00 | 2.00 | CARQ |
| ATOM | 7030 | H3  | BGLC | 16 | -7.158  | -4.657-183.542 | 1.00 | 0.00 | CARQ |
| ATOM | 7031 | O3  | BGLC | 16 | -7.390  | -6.544-184.418 | 1.00 | 2.00 | CARQ |
| ATOM | 7032 | HO3 | BGLC | 16 | -6.512  | -6.886-184.366 | 1.00 | 0.00 | CARQ |
| ATOM | 7033 | C4  | BGLC | 16 | -9.178  | -4.924-183.947 | 1.00 | 2.00 | CARQ |
| ATOM | 7034 | H4  | BGLC | 16 | -9.942  | -5.692-184.020 | 1.00 | 0.00 | CARQ |
| ATOM | 7035 | O4  | BGLC | 16 | -9.219  | -4.382-185.231 | 1.00 | 2.00 | CARQ |
| ATOM | 7036 | C6  | BGLC | 16 | -11.088 | -3.458-183.170 | 1.00 | 2.00 | CARQ |
| ATOM | 7037 | H61 | BGLC | 16 | -11.534 | -4.385-183.677 | 1.00 | 0.00 | CARQ |
| ATOM | 7038 | H62 | BGLC | 16 | -11.741 | -3.294-182.319 | 1.00 | 0.00 | CARQ |
| ATOM | 7039 | O6  | BGLC | 16 | -11.149 | -2.456-184.165 | 1.00 | 2.00 | CARQ |
| ATOM | 7040 | HO6 | BGLC | 16 | -10.635 | -1.663-184.050 | 1.00 | 0.00 | CARQ |
| ATOM | 7041 | C1  | BGLC | 17 | -9.383  | -4.900-186.367 | 1.00 | 2.00 | CARQ |
| ATOM | 7042 | H1  | BGLC | 17 | -10.185 | -5.629-186.356 | 1.00 | 0.00 | CARQ |
| ATOM | 7043 | C5  | BGLC | 17 | -8.214  | -6.075-188.083 | 1.00 | 2.00 | CARQ |
| ATOM | 7044 | H5  | BGLC | 17 | -8.913  | -6.935-188.125 | 1.00 | 0.00 | CARQ |
| ATOM | 7045 | O5  | BGLC | 17 | -8.185  | -5.509-186.787 | 1.00 | 2.00 | CARQ |
| ATOM | 7046 | C2  | BGLC | 17 | -9.859  | -3.840-187.354 | 1.00 | 2.00 | CARQ |
| ATOM | 7047 | H2  | BGLC | 17 | -9.084  | -3.007-187.356 | 1.00 | 0.00 | CARQ |
| ATOM | 7048 | O2  | BGLC | 17 | -11.082 | -3.263-186.913 | 1.00 | 2.00 | CARQ |
| ATOM | 7049 | HO2 | BGLC | 17 | -11.154 | -2.315-186.968 | 1.00 | 0.00 | CARQ |
| ATOM | 7050 | C3  | BGLC | 17 | -10.008 | -4.448-188.733 | 1.00 | 2.00 | CARQ |
| ATOM | 7051 | H3  | BGLC | 17 | -10.675 | -5.310-188.727 | 1.00 | 0.00 | CARQ |
| ATOM | 7052 | O3  | BGLC | 17 | -10.441 | -3.429-189.613 | 1.00 | 2.00 | CARQ |
| ATOM | 7053 | HO3 | BGLC | 17 | -11.320 | -3.087-189.563 | 1.00 | 0.00 | CARQ |
| ATOM | 7054 | C4  | BGLC | 17 | -8.654  | -5.049-189.137 | 1.00 | 2.00 | CARQ |
| ATOM | 7055 | H4  | BGLC | 17 | -7.890  | -4.281-189.215 | 1.00 | 0.00 | CARQ |
| ATOM | 7056 | O4  | BGLC | 17 | -8.615  | -5.596-190.419 | 1.00 | 2.00 | CARQ |
| ATOM | 7057 | C6  | BGLC | 17 | -6.742  | -6.509-188.356 | 1.00 | 2.00 | CARQ |
| ATOM | 7058 | H61 | BGLC | 17 | -6.298  | -5.585-188.869 | 1.00 | 0.00 | CARQ |
| ATOM | 7059 | H62 | BGLC | 17 | -6.087  | -6.667-187.505 | 1.00 | 0.00 | CARQ |
| ATOM | 7060 | O6  | BGLC | 17 | -6.684  | -7.517-189.347 | 1.00 | 2.00 | CARQ |
| ATOM | 7061 | HO6 | BGLC | 17 | -7.198  | -8.309-189.226 | 1.00 | 0.00 | CARQ |
| ATOM | 7062 | C1  | BGLC | 18 | -8.452  | -5.082-191.557 | 1.00 | 2.00 | CARQ |
| ATOM | 7063 | H1  | BGLC | 18 | -7.650  | -4.353-191.549 | 1.00 | 0.00 | CARQ |
| ATOM | 7064 | C5  | BGLC | 18 | -9.621  | -3.913-193.277 | 1.00 | 2.00 | CARQ |
| ATOM | 7065 | H5  | BGLC | 18 | -8.922  | -3.053-193.323 | 1.00 | 0.00 | CARQ |
| ATOM | 7066 | O5  | BGLC | 18 | -9.649  | -4.475-191.978 | 1.00 | 2.00 | CARQ |
| ATOM | 7067 | C2  | BGLC | 18 | -7.976  | -6.145-192.540 | 1.00 | 2.00 | CARQ |
| ATOM | 7068 | H2  | BGLC | 18 | -8.752  | -6.977-192.538 | 1.00 | 0.00 | CARQ |
| ATOM | 7069 | O2  | BGLC | 18 | -6.754  | -6.722-192.098 | 1.00 | 2.00 | CARQ |
| ATOM | 7070 | HO2 | BGLC | 18 | -6.683  | -7.671-192.151 | 1.00 | 0.00 | CARQ |
| ATOM | 7071 | C3  | BGLC | 18 | -7.828  | -5.542-193.922 | 1.00 | 2.00 | CARQ |
| ATOM | 7072 | H3  | BGLC | 18 | -7.161  | -4.680-193.920 | 1.00 | 0.00 | CARQ |

|      |      |     |      |    |         |                 |      |      |      |
|------|------|-----|------|----|---------|-----------------|------|------|------|
| ATOM | 7073 | O3  | BGLC | 18 | -7.394  | -6.565-194.798  | 1.00 | 2.00 | CARQ |
| ATOM | 7074 | HO3 | BGLC | 18 | -6.515  | -6.906-194.747  | 1.00 | 0.00 | CARQ |
| ATOM | 7075 | C4  | BGLC | 18 | -9.182  | -4.943-194.327  | 1.00 | 2.00 | CARQ |
| ATOM | 7076 | H4  | BGLC | 18 | -9.945  | -5.712-194.400  | 1.00 | 0.00 | CARQ |
| ATOM | 7077 | O4  | BGLC | 18 | -9.224  | -4.402-195.611  | 1.00 | 2.00 | CARQ |
| ATOM | 7078 | C6  | BGLC | 18 | -11.092 | -3.480-193.550  | 1.00 | 2.00 | CARQ |
| ATOM | 7079 | H61 | BGLC | 18 | -11.537 | -4.407-194.058  | 1.00 | 0.00 | CARQ |
| ATOM | 7080 | H62 | BGLC | 18 | -11.746 | -3.318-192.699  | 1.00 | 0.00 | CARQ |
| ATOM | 7081 | O6  | BGLC | 18 | -11.153 | -2.477-194.545  | 1.00 | 2.00 | CARQ |
| ATOM | 7082 | HO6 | BGLC | 18 | -10.639 | -1.684-194.429  | 1.00 | 0.00 | CARQ |
| ATOM | 7083 | C1  | BGLC | 19 | -9.387  | -4.919-196.747  | 1.00 | 2.00 | CARQ |
| ATOM | 7084 | H1  | BGLC | 19 | -10.190 | -5.647-196.737  | 1.00 | 0.00 | CARQ |
| ATOM | 7085 | C5  | BGLC | 19 | -8.218  | -6.097-198.463  | 1.00 | 2.00 | CARQ |
| ATOM | 7086 | H5  | BGLC | 19 | -8.917  | -6.957-198.505  | 1.00 | 0.00 | CARQ |
| ATOM | 7087 | O5  | BGLC | 19 | -8.189  | -5.530-197.167  | 1.00 | 2.00 | CARQ |
| ATOM | 7088 | C2  | BGLC | 19 | -9.863  | -3.861-197.734  | 1.00 | 2.00 | CARQ |
| ATOM | 7089 | H2  | BGLC | 19 | -9.088  | -3.029-197.736  | 1.00 | 0.00 | CARQ |
| ATOM | 7090 | O2  | BGLC | 19 | -11.087 | -3.283-197.293  | 1.00 | 2.00 | CARQ |
| ATOM | 7091 | HO2 | BGLC | 19 | -11.159 | -2.335-197.349  | 1.00 | 0.00 | CARQ |
| ATOM | 7092 | C3  | BGLC | 19 | -10.012 | -4.470-199.113  | 1.00 | 2.00 | CARQ |
| ATOM | 7093 | H3  | BGLC | 19 | -10.678 | -5.332-199.108  | 1.00 | 0.00 | CARQ |
| ATOM | 7094 | O3  | BGLC | 19 | -10.445 | -3.449-199.993  | 1.00 | 2.00 | CARQ |
| ATOM | 7095 | HO3 | BGLC | 19 | -11.323 | -3.107-199.943  | 1.00 | 0.00 | CARQ |
| ATOM | 7096 | C4  | BGLC | 19 | -8.659  | -5.069-199.517  | 1.00 | 2.00 | CARQ |
| ATOM | 7097 | H4  | BGLC | 19 | -7.895  | -4.301-199.594  | 1.00 | 0.00 | CARQ |
| ATOM | 7098 | O4  | BGLC | 19 | -8.619  | -5.617-200.799  | 1.00 | 2.00 | CARQ |
| ATOM | 7099 | C6  | BGLC | 19 | -6.747  | -6.531-198.736  | 1.00 | 2.00 | CARQ |
| ATOM | 7100 | H61 | BGLC | 19 | -6.302  | -5.606-199.248  | 1.00 | 0.00 | CARQ |
| ATOM | 7101 | H62 | BGLC | 19 | -6.093  | -6.690-197.885  | 1.00 | 0.00 | CARQ |
| ATOM | 7102 | O6  | BGLC | 19 | -6.689  | -7.537-199.727  | 1.00 | 2.00 | CARQ |
| ATOM | 7103 | HO6 | BGLC | 19 | -7.203  | -8.329-199.607  | 1.00 | 0.00 | CARQ |
| ATOM | 7104 | C1  | BGLC | 20 | -8.456  | -5.103-201.937  | 1.00 | 2.00 | CARQ |
| ATOM | 7105 | H1  | BGLC | 20 | -7.655  | -4.374-201.929  | 1.00 | 0.00 | CARQ |
| ATOM | 7106 | C5  | BGLC | 20 | -9.625  | -3.933-203.657  | 1.00 | 2.00 | CARQ |
| ATOM | 7107 | H5  | BGLC | 20 | -8.925  | -3.073-203.701  | 1.00 | 0.00 | CARQ |
| ATOM | 7108 | O5  | BGLC | 20 | -9.655  | -4.496-202.358  | 1.00 | 2.00 | CARQ |
| ATOM | 7109 | C2  | BGLC | 20 | -7.980  | -6.165-202.920  | 1.00 | 2.00 | CARQ |
| ATOM | 7110 | H2  | BGLC | 20 | -8.756  | -6.996-202.917  | 1.00 | 0.00 | CARQ |
| ATOM | 7111 | O2  | BGLC | 20 | -6.757  | -6.743-202.478  | 1.00 | 2.00 | CARQ |
| ATOM | 7112 | HO2 | BGLC | 20 | -6.686  | -7.692-202.531  | 1.00 | 0.00 | CARQ |
| ATOM | 7113 | C3  | BGLC | 20 | -7.833  | -5.562-204.302  | 1.00 | 2.00 | CARQ |
| ATOM | 7114 | H3  | BGLC | 20 | -7.167  | -4.700-204.301  | 1.00 | 0.00 | CARQ |
| ATOM | 7115 | O3  | BGLC | 20 | -7.399  | -6.586-205.178  | 1.00 | 2.00 | CARQ |
| ATOM | 7116 | HO3 | BGLC | 20 | -6.520  | -6.927-205.127  | 1.00 | 0.00 | CARQ |
| ATOM | 7117 | C4  | BGLC | 20 | -9.187  | -4.964-204.707  | 1.00 | 2.00 | CARQ |
| ATOM | 7118 | H4  | BGLC | 20 | -10.015 | -5.641-204.896  | 1.00 | 0.00 | CARQ |
| ATOM | 7119 | O4  | BGLC | 20 | -9.069  | -4.230-205.935  | 1.00 | 2.00 | CARQ |
| ATOM | 7120 | HO4 | BGLC | 20 | -8.572  | -4.776-206.597  | 1.00 | 0.00 | CARQ |
| ATOM | 7121 | C6  | BGLC | 20 | -11.097 | -3.500-203.930  | 1.00 | 2.00 | CARQ |
| ATOM | 7122 | H61 | BGLC | 20 | -11.542 | -4.427-204.438  | 1.00 | 0.00 | CARQ |
| ATOM | 7123 | H62 | BGLC | 20 | -11.750 | -3.337-203.079  | 1.00 | 0.00 | CARQ |
| ATOM | 7124 | O6  | BGLC | 20 | -11.157 | -2.498-204.925  | 1.00 | 2.00 | CARQ |
| ATOM | 7125 | HO6 | BGLC | 20 | -10.643 | -1.705-204.809  | 1.00 | 0.00 | CARQ |
| ATOM | 7126 | C1  | BGLC | 1  | -3.350  | -10.329-103.319 | 1.00 | 2.00 | CARR |

|      |      |     |      |   |        |         |          |      |      |      |
|------|------|-----|------|---|--------|---------|----------|------|------|------|
| ATOM | 7127 | H1  | BGLC | 1 | -4.194 | -11.000 | -103.211 | 1.00 | 0.00 | CARR |
| ATOM | 7128 | O1  | BGLC | 1 | -3.028 | -9.617  | -102.126 | 1.00 | 2.00 | CARR |
| ATOM | 7129 | HO1 | BGLC | 1 | -2.520 | -8.879  | -102.387 | 1.00 | 0.00 | CARR |
| ATOM | 7130 | C5  | BGLC | 1 | -2.181 | -11.505 | -105.035 | 1.00 | 2.00 | CARR |
| ATOM | 7131 | H5  | BGLC | 1 | -2.881 | -12.365 | -105.077 | 1.00 | 0.00 | CARR |
| ATOM | 7132 | O5  | BGLC | 1 | -2.151 | -10.939 | -103.738 | 1.00 | 2.00 | CARR |
| ATOM | 7133 | C2  | BGLC | 1 | -3.826 | -9.269  | -104.306 | 1.00 | 2.00 | CARR |
| ATOM | 7134 | H2  | BGLC | 1 | -3.052 | -8.436  | -104.308 | 1.00 | 0.00 | CARR |
| ATOM | 7135 | O2  | BGLC | 1 | -5.049 | -8.692  | -103.864 | 1.00 | 2.00 | CARR |
| ATOM | 7136 | HO2 | BGLC | 1 | -5.121 | -7.744  | -103.919 | 1.00 | 0.00 | CARR |
| ATOM | 7137 | C3  | BGLC | 1 | -3.974 | -9.878  | -105.684 | 1.00 | 2.00 | CARR |
| ATOM | 7138 | H3  | BGLC | 1 | -4.641 | -10.740 | -105.677 | 1.00 | 0.00 | CARR |
| ATOM | 7139 | O3  | BGLC | 1 | -4.408 | -8.859  | -106.564 | 1.00 | 2.00 | CARR |
| ATOM | 7140 | HO3 | BGLC | 1 | -5.287 | -8.518  | -106.514 | 1.00 | 0.00 | CARR |
| ATOM | 7141 | C4  | BGLC | 1 | -2.621 | -10.479 | -106.089 | 1.00 | 2.00 | CARR |
| ATOM | 7142 | H4  | BGLC | 1 | -1.858 | -9.711  | -106.166 | 1.00 | 0.00 | CARR |
| ATOM | 7143 | O4  | BGLC | 1 | -2.581 | -11.025 | -107.371 | 1.00 | 2.00 | CARR |
| ATOM | 7144 | C6  | BGLC | 1 | -0.710 | -11.939 | -105.308 | 1.00 | 2.00 | CARR |
| ATOM | 7145 | H61 | BGLC | 1 | -0.266 | -11.014 | -105.820 | 1.00 | 0.00 | CARR |
| ATOM | 7146 | H62 | BGLC | 1 | -0.055 | -12.098 | -104.457 | 1.00 | 0.00 | CARR |
| ATOM | 7147 | O6  | BGLC | 1 | -0.651 | -12.946 | -106.299 | 1.00 | 2.00 | CARR |
| ATOM | 7148 | HO6 | BGLC | 1 | -1.165 | -13.739 | -106.179 | 1.00 | 0.00 | CARR |
| ATOM | 7149 | C1  | BGLC | 2 | -2.420 | -10.511 | -108.509 | 1.00 | 2.00 | CARR |
| ATOM | 7150 | H1  | BGLC | 2 | -1.618 | -9.782  | -108.502 | 1.00 | 0.00 | CARR |
| ATOM | 7151 | C5  | BGLC | 2 | -3.588 | -9.342  | -110.229 | 1.00 | 2.00 | CARR |
| ATOM | 7152 | H5  | BGLC | 2 | -2.889 | -8.482  | -110.275 | 1.00 | 0.00 | CARR |
| ATOM | 7153 | O5  | BGLC | 2 | -3.616 | -9.904  | -108.930 | 1.00 | 2.00 | CARR |
| ATOM | 7154 | C2  | BGLC | 2 | -1.944 | -11.575 | -109.492 | 1.00 | 2.00 | CARR |
| ATOM | 7155 | H2  | BGLC | 2 | -2.720 | -12.407 | -109.491 | 1.00 | 0.00 | CARR |
| ATOM | 7156 | O2  | BGLC | 2 | -0.721 | -12.152 | -109.049 | 1.00 | 2.00 | CARR |
| ATOM | 7157 | HO2 | BGLC | 2 | -0.650 | -13.101 | -109.101 | 1.00 | 0.00 | CARR |
| ATOM | 7158 | C3  | BGLC | 2 | -1.795 | -10.971 | -110.873 | 1.00 | 2.00 | CARR |
| ATOM | 7159 | H3  | BGLC | 2 | -1.129 | -10.109 | -110.872 | 1.00 | 0.00 | CARR |
| ATOM | 7160 | O3  | BGLC | 2 | -1.363 | -11.995 | -111.749 | 1.00 | 2.00 | CARR |
| ATOM | 7161 | HO3 | BGLC | 2 | -0.485 | -12.338 | -111.698 | 1.00 | 0.00 | CARR |
| ATOM | 7162 | C4  | BGLC | 2 | -3.149 | -10.374 | -111.279 | 1.00 | 2.00 | CARR |
| ATOM | 7163 | H4  | BGLC | 2 | -3.913 | -11.142 | -111.352 | 1.00 | 0.00 | CARR |
| ATOM | 7164 | O4  | BGLC | 2 | -3.190 | -9.832  | -112.563 | 1.00 | 2.00 | CARR |
| ATOM | 7165 | C6  | BGLC | 2 | -5.059 | -8.909  | -110.502 | 1.00 | 2.00 | CARR |
| ATOM | 7166 | H61 | BGLC | 2 | -5.504 | -9.836  | -111.010 | 1.00 | 0.00 | CARR |
| ATOM | 7167 | H62 | BGLC | 2 | -5.713 | -8.747  | -109.651 | 1.00 | 0.00 | CARR |
| ATOM | 7168 | O6  | BGLC | 2 | -5.120 | -7.906  | -111.497 | 1.00 | 2.00 | CARR |
| ATOM | 7169 | HO6 | BGLC | 2 | -4.606 | -7.113  | -111.381 | 1.00 | 0.00 | CARR |
| ATOM | 7170 | C1  | BGLC | 3 | -3.354 | -10.349 | -113.699 | 1.00 | 2.00 | CARR |
| ATOM | 7171 | H1  | BGLC | 3 | -4.157 | -11.077 | -113.688 | 1.00 | 0.00 | CARR |
| ATOM | 7172 | C5  | BGLC | 3 | -2.185 | -11.524 | -115.415 | 1.00 | 2.00 | CARR |
| ATOM | 7173 | H5  | BGLC | 3 | -2.885 | -12.383 | -115.458 | 1.00 | 0.00 | CARR |
| ATOM | 7174 | O5  | BGLC | 3 | -2.156 | -10.959 | -114.118 | 1.00 | 2.00 | CARR |
| ATOM | 7175 | C2  | BGLC | 3 | -3.830 | -9.291  | -114.686 | 1.00 | 2.00 | CARR |
| ATOM | 7176 | H2  | BGLC | 3 | -3.054 | -8.459  | -114.687 | 1.00 | 0.00 | CARR |
| ATOM | 7177 | O2  | BGLC | 3 | -5.054 | -8.712  | -114.244 | 1.00 | 2.00 | CARR |
| ATOM | 7178 | HO2 | BGLC | 3 | -5.126 | -7.764  | -114.300 | 1.00 | 0.00 | CARR |
| ATOM | 7179 | C3  | BGLC | 3 | -3.978 | -9.898  | -116.064 | 1.00 | 2.00 | CARR |
| ATOM | 7180 | H3  | BGLC | 3 | -4.644 | -10.760 | -116.058 | 1.00 | 0.00 | CARR |

|      |      |     |      |   |        |         |          |      |      |      |
|------|------|-----|------|---|--------|---------|----------|------|------|------|
| ATOM | 7181 | O3  | BGLC | 3 | -4.412 | -8.878  | -116.944 | 1.00 | 2.00 | CARR |
| ATOM | 7182 | HO3 | BGLC | 3 | -5.291 | -8.537  | -116.894 | 1.00 | 0.00 | CARR |
| ATOM | 7183 | C4  | BGLC | 3 | -2.625 | -10.498 | -116.469 | 1.00 | 2.00 | CARR |
| ATOM | 7184 | H4  | BGLC | 3 | -1.862 | -9.730  | -116.546 | 1.00 | 0.00 | CARR |
| ATOM | 7185 | O4  | BGLC | 3 | -2.584 | -11.046 | -117.751 | 1.00 | 2.00 | CARR |
| ATOM | 7186 | C6  | BGLC | 3 | -0.715 | -11.959 | -115.688 | 1.00 | 2.00 | CARR |
| ATOM | 7187 | H61 | BGLC | 3 | -0.271 | -11.034 | -116.199 | 1.00 | 0.00 | CARR |
| ATOM | 7188 | H62 | BGLC | 3 | -0.061 | -12.118 | -114.837 | 1.00 | 0.00 | CARR |
| ATOM | 7189 | O6  | BGLC | 3 | -0.654 | -12.966 | -116.679 | 1.00 | 2.00 | CARR |
| ATOM | 7190 | HO6 | BGLC | 3 | -1.167 | -13.759 | -116.560 | 1.00 | 0.00 | CARR |
| ATOM | 7191 | C1  | BGLC | 4 | -2.424 | -10.533 | -118.889 | 1.00 | 2.00 | CARR |
| ATOM | 7192 | H1  | BGLC | 4 | -1.622 | -9.804  | -118.883 | 1.00 | 0.00 | CARR |
| ATOM | 7193 | C5  | BGLC | 4 | -3.592 | -9.364  | -120.609 | 1.00 | 2.00 | CARR |
| ATOM | 7194 | H5  | BGLC | 4 | -2.891 | -8.505  | -120.656 | 1.00 | 0.00 | CARR |
| ATOM | 7195 | O5  | BGLC | 4 | -3.620 | -9.925  | -119.310 | 1.00 | 2.00 | CARR |
| ATOM | 7196 | C2  | BGLC | 4 | -1.948 | -11.594 | -119.872 | 1.00 | 2.00 | CARR |
| ATOM | 7197 | H2  | BGLC | 4 | -2.725 | -12.425 | -119.869 | 1.00 | 0.00 | CARR |
| ATOM | 7198 | O2  | BGLC | 4 | -0.724 | -12.172 | -119.429 | 1.00 | 2.00 | CARR |
| ATOM | 7199 | HO2 | BGLC | 4 | -0.653 | -13.121 | -119.482 | 1.00 | 0.00 | CARR |
| ATOM | 7200 | C3  | BGLC | 4 | -1.800 | -10.993 | -121.253 | 1.00 | 2.00 | CARR |
| ATOM | 7201 | H3  | BGLC | 4 | -1.133 | -10.131 | -121.251 | 1.00 | 0.00 | CARR |
| ATOM | 7202 | O3  | BGLC | 4 | -1.368 | -12.015 | -122.129 | 1.00 | 2.00 | CARR |
| ATOM | 7203 | HO3 | BGLC | 4 | -0.489 | -12.357 | -122.079 | 1.00 | 0.00 | CARR |
| ATOM | 7204 | C4  | BGLC | 4 | -3.154 | -10.394 | -121.659 | 1.00 | 2.00 | CARR |
| ATOM | 7205 | H4  | BGLC | 4 | -3.919 | -11.161 | -121.733 | 1.00 | 0.00 | CARR |
| ATOM | 7206 | O4  | BGLC | 4 | -3.194 | -9.852  | -122.943 | 1.00 | 2.00 | CARR |
| ATOM | 7207 | C6  | BGLC | 4 | -5.063 | -8.929  | -120.882 | 1.00 | 2.00 | CARR |
| ATOM | 7208 | H61 | BGLC | 4 | -5.509 | -9.856  | -121.389 | 1.00 | 0.00 | CARR |
| ATOM | 7209 | H62 | BGLC | 4 | -5.716 | -8.765  | -120.031 | 1.00 | 0.00 | CARR |
| ATOM | 7210 | O6  | BGLC | 4 | -5.124 | -7.927  | -121.877 | 1.00 | 2.00 | CARR |
| ATOM | 7211 | HO6 | BGLC | 4 | -4.610 | -7.134  | -121.762 | 1.00 | 0.00 | CARR |
| ATOM | 7212 | C1  | BGLC | 5 | -3.359 | -10.369 | -124.079 | 1.00 | 2.00 | CARR |
| ATOM | 7213 | H1  | BGLC | 5 | -4.162 | -11.097 | -124.068 | 1.00 | 0.00 | CARR |
| ATOM | 7214 | C5  | BGLC | 5 | -2.190 | -11.546 | -125.795 | 1.00 | 2.00 | CARR |
| ATOM | 7215 | H5  | BGLC | 5 | -2.890 | -12.405 | -125.837 | 1.00 | 0.00 | CARR |
| ATOM | 7216 | O5  | BGLC | 5 | -2.160 | -10.979 | -124.498 | 1.00 | 2.00 | CARR |
| ATOM | 7217 | C2  | BGLC | 5 | -3.834 | -9.311  | -125.066 | 1.00 | 2.00 | CARR |
| ATOM | 7218 | H2  | BGLC | 5 | -3.059 | -8.478  | -125.068 | 1.00 | 0.00 | CARR |
| ATOM | 7219 | O2  | BGLC | 5 | -5.058 | -8.733  | -124.624 | 1.00 | 2.00 | CARR |
| ATOM | 7220 | HO2 | BGLC | 5 | -5.130 | -7.785  | -124.680 | 1.00 | 0.00 | CARR |
| ATOM | 7221 | C3  | BGLC | 5 | -3.983 | -9.919  | -126.444 | 1.00 | 2.00 | CARR |
| ATOM | 7222 | H3  | BGLC | 5 | -4.649 | -10.781 | -126.437 | 1.00 | 0.00 | CARR |
| ATOM | 7223 | O3  | BGLC | 5 | -4.417 | -8.900  | -127.324 | 1.00 | 2.00 | CARR |
| ATOM | 7224 | HO3 | BGLC | 5 | -5.296 | -8.559  | -127.274 | 1.00 | 0.00 | CARR |
| ATOM | 7225 | C4  | BGLC | 5 | -2.630 | -10.519 | -126.849 | 1.00 | 2.00 | CARR |
| ATOM | 7226 | H4  | BGLC | 5 | -1.866 | -9.751  | -126.926 | 1.00 | 0.00 | CARR |
| ATOM | 7227 | O4  | BGLC | 5 | -2.589 | -11.067 | -128.131 | 1.00 | 2.00 | CARR |
| ATOM | 7228 | C6  | BGLC | 5 | -0.720 | -11.981 | -126.068 | 1.00 | 2.00 | CARR |
| ATOM | 7229 | O61 | BGLC | 5 | -0.628 | -13.374 | -126.305 | 1.00 | 0.00 | CARR |
| ATOM | 7230 | O62 | BGLC | 5 | -0.077 | -11.097 | -126.014 | 1.00 | 0.00 | CARR |
| ATOM | 7231 | C1  | BGLC | 6 | -2.429 | -10.554 | -129.269 | 1.00 | 2.00 | CARR |
| ATOM | 7232 | H1  | BGLC | 6 | -1.627 | -9.826  | -129.264 | 1.00 | 0.00 | CARR |
| ATOM | 7233 | C5  | BGLC | 6 | -3.597 | -9.384  | -130.989 | 1.00 | 2.00 | CARR |
| ATOM | 7234 | H5  | BGLC | 6 | -2.897 | -8.525  | -131.036 | 1.00 | 0.00 | CARR |

|      |      |     |      |   |        |         |          |      |      |      |
|------|------|-----|------|---|--------|---------|----------|------|------|------|
| ATOM | 7235 | O5  | BGLC | 6 | -3.625 | -9.945  | -129.690 | 1.00 | 2.00 | CARR |
| ATOM | 7236 | C2  | BGLC | 6 | -1.952 | -11.616 | -130.252 | 1.00 | 2.00 | CARR |
| ATOM | 7237 | H2  | BGLC | 6 | -2.727 | -12.448 | -130.250 | 1.00 | 0.00 | CARR |
| ATOM | 7238 | O2  | BGLC | 6 | -0.728 | -12.193 | -129.809 | 1.00 | 2.00 | CARR |
| ATOM | 7239 | HO2 | BGLC | 6 | -0.656 | -13.142 | -129.862 | 1.00 | 0.00 | CARR |
| ATOM | 7240 | C3  | BGLC | 6 | -1.805 | -11.012 | -131.633 | 1.00 | 2.00 | CARR |
| ATOM | 7241 | H3  | BGLC | 6 | -1.139 | -10.150 | -131.631 | 1.00 | 0.00 | CARR |
| ATOM | 7242 | O3  | BGLC | 6 | -1.372 | -12.035 | -132.509 | 1.00 | 2.00 | CARR |
| ATOM | 7243 | HO3 | BGLC | 6 | -0.493 | -12.376 | -132.458 | 1.00 | 0.00 | CARR |
| ATOM | 7244 | C4  | BGLC | 6 | -3.159 | -10.415 | -132.039 | 1.00 | 2.00 | CARR |
| ATOM | 7245 | H4  | BGLC | 6 | -3.924 | -11.182 | -132.113 | 1.00 | 0.00 | CARR |
| ATOM | 7246 | O4  | BGLC | 6 | -3.199 | -9.873  | -133.323 | 1.00 | 2.00 | CARR |
| ATOM | 7247 | C6  | BGLC | 6 | -5.068 | -8.950  | -131.262 | 1.00 | 2.00 | CARR |
| ATOM | 7248 | H61 | BGLC | 6 | -5.513 | -9.877  | -131.769 | 1.00 | 0.00 | CARR |
| ATOM | 7249 | H62 | BGLC | 6 | -5.721 | -8.787  | -130.411 | 1.00 | 0.00 | CARR |
| ATOM | 7250 | O6  | BGLC | 6 | -5.129 | -7.948  | -132.257 | 1.00 | 2.00 | CARR |
| ATOM | 7251 | HO6 | BGLC | 6 | -4.615 | -7.155  | -132.142 | 1.00 | 0.00 | CARR |
| ATOM | 7252 | C1  | BGLC | 7 | -3.363 | -10.390 | -134.459 | 1.00 | 2.00 | CARR |
| ATOM | 7253 | H1  | BGLC | 7 | -4.166 | -11.118 | -134.448 | 1.00 | 0.00 | CARR |
| ATOM | 7254 | C5  | BGLC | 7 | -2.195 | -11.567 | -136.175 | 1.00 | 2.00 | CARR |
| ATOM | 7255 | H5  | BGLC | 7 | -2.895 | -12.427 | -136.216 | 1.00 | 0.00 | CARR |
| ATOM | 7256 | O5  | BGLC | 7 | -2.165 | -11.000 | -134.878 | 1.00 | 2.00 | CARR |
| ATOM | 7257 | C2  | BGLC | 7 | -3.838 | -9.331  | -135.446 | 1.00 | 2.00 | CARR |
| ATOM | 7258 | H2  | BGLC | 7 | -3.064 | -8.498  | -135.450 | 1.00 | 0.00 | CARR |
| ATOM | 7259 | O2  | BGLC | 7 | -5.061 | -8.754  | -135.004 | 1.00 | 2.00 | CARR |
| ATOM | 7260 | HO2 | BGLC | 7 | -5.133 | -7.806  | -135.059 | 1.00 | 0.00 | CARR |
| ATOM | 7261 | C3  | BGLC | 7 | -3.988 | -9.941  | -136.824 | 1.00 | 2.00 | CARR |
| ATOM | 7262 | H3  | BGLC | 7 | -4.654 | -10.803 | -136.818 | 1.00 | 0.00 | CARR |
| ATOM | 7263 | O3  | BGLC | 7 | -4.421 | -8.921  | -137.704 | 1.00 | 2.00 | CARR |
| ATOM | 7264 | HO3 | BGLC | 7 | -5.299 | -8.578  | -137.653 | 1.00 | 0.00 | CARR |
| ATOM | 7265 | C4  | BGLC | 7 | -2.634 | -10.541 | -137.229 | 1.00 | 2.00 | CARR |
| ATOM | 7266 | H4  | BGLC | 7 | -1.870 | -9.773  | -137.306 | 1.00 | 0.00 | CARR |
| ATOM | 7267 | O4  | BGLC | 7 | -2.594 | -11.087 | -138.511 | 1.00 | 2.00 | CARR |
| ATOM | 7268 | C6  | BGLC | 7 | -0.724 | -12.001 | -136.448 | 1.00 | 2.00 | CARR |
| ATOM | 7269 | H61 | BGLC | 7 | -0.280 | -11.076 | -136.959 | 1.00 | 0.00 | CARR |
| ATOM | 7270 | H62 | BGLC | 7 | -0.070 | -12.160 | -135.597 | 1.00 | 0.00 | CARR |
| ATOM | 7271 | O6  | BGLC | 7 | -0.664 | -13.007 | -137.439 | 1.00 | 2.00 | CARR |
| ATOM | 7272 | HO6 | BGLC | 7 | -1.177 | -13.800 | -137.320 | 1.00 | 0.00 | CARR |
| ATOM | 7273 | C1  | BGLC | 8 | -2.433 | -10.575 | -139.649 | 1.00 | 2.00 | CARR |
| ATOM | 7274 | H1  | BGLC | 8 | -1.630 | -9.847  | -139.644 | 1.00 | 0.00 | CARR |
| ATOM | 7275 | C5  | BGLC | 8 | -3.602 | -9.405  | -141.369 | 1.00 | 2.00 | CARR |
| ATOM | 7276 | H5  | BGLC | 8 | -2.901 | -8.546  | -141.416 | 1.00 | 0.00 | CARR |
| ATOM | 7277 | O5  | BGLC | 8 | -3.630 | -9.966  | -140.070 | 1.00 | 2.00 | CARR |
| ATOM | 7278 | C2  | BGLC | 8 | -1.956 | -11.636 | -140.632 | 1.00 | 2.00 | CARR |
| ATOM | 7279 | H2  | BGLC | 8 | -2.732 | -12.468 | -140.630 | 1.00 | 0.00 | CARR |
| ATOM | 7280 | O2  | BGLC | 8 | -0.733 | -12.213 | -140.189 | 1.00 | 2.00 | CARR |
| ATOM | 7281 | HO2 | BGLC | 8 | -0.661 | -13.161 | -140.242 | 1.00 | 0.00 | CARR |
| ATOM | 7282 | C3  | BGLC | 8 | -1.809 | -11.033 | -142.013 | 1.00 | 2.00 | CARR |
| ATOM | 7283 | H3  | BGLC | 8 | -1.143 | -10.171 | -142.012 | 1.00 | 0.00 | CARR |
| ATOM | 7284 | O3  | BGLC | 8 | -1.375 | -12.057 | -142.889 | 1.00 | 2.00 | CARR |
| ATOM | 7285 | HO3 | BGLC | 8 | -0.496 | -12.398 | -142.838 | 1.00 | 0.00 | CARR |
| ATOM | 7286 | C4  | BGLC | 8 | -3.164 | -10.435 | -142.419 | 1.00 | 2.00 | CARR |
| ATOM | 7287 | H4  | BGLC | 8 | -3.929 | -11.202 | -142.493 | 1.00 | 0.00 | CARR |
| ATOM | 7288 | O4  | BGLC | 8 | -3.204 | -9.893  | -143.703 | 1.00 | 2.00 | CARR |

|      |      |     |      |    |        |         |          |      |      |      |
|------|------|-----|------|----|--------|---------|----------|------|------|------|
| ATOM | 7289 | C6  | BGLC | 8  | -5.073 | -8.970  | -141.642 | 1.00 | 2.00 | CARR |
| ATOM | 7290 | H61 | BGLC | 8  | -5.519 | -9.897  | -142.148 | 1.00 | 0.00 | CARR |
| ATOM | 7291 | H62 | BGLC | 8  | -5.726 | -8.806  | -140.791 | 1.00 | 0.00 | CARR |
| ATOM | 7292 | O6  | BGLC | 8  | -5.134 | -7.969  | -142.637 | 1.00 | 2.00 | CARR |
| ATOM | 7293 | HO6 | BGLC | 8  | -4.620 | -7.176  | -142.522 | 1.00 | 0.00 | CARR |
| ATOM | 7294 | C1  | BGLC | 9  | -3.368 | -10.411 | -144.839 | 1.00 | 2.00 | CARR |
| ATOM | 7295 | H1  | BGLC | 9  | -4.170 | -11.139 | -144.828 | 1.00 | 0.00 | CARR |
| ATOM | 7296 | C5  | BGLC | 9  | -2.200 | -11.587 | -146.555 | 1.00 | 2.00 | CARR |
| ATOM | 7297 | H5  | BGLC | 9  | -2.900 | -12.446 | -146.597 | 1.00 | 0.00 | CARR |
| ATOM | 7298 | O5  | BGLC | 9  | -2.169 | -11.021 | -145.258 | 1.00 | 2.00 | CARR |
| ATOM | 7299 | C2  | BGLC | 9  | -3.843 | -9.353  | -145.826 | 1.00 | 2.00 | CARR |
| ATOM | 7300 | H2  | BGLC | 9  | -3.067 | -8.521  | -145.828 | 1.00 | 0.00 | CARR |
| ATOM | 7301 | O2  | BGLC | 9  | -5.066 | -8.774  | -145.384 | 1.00 | 2.00 | CARR |
| ATOM | 7302 | HO2 | BGLC | 9  | -5.137 | -7.826  | -145.440 | 1.00 | 0.00 | CARR |
| ATOM | 7303 | C3  | BGLC | 9  | -3.993 | -9.961  | -147.204 | 1.00 | 2.00 | CARR |
| ATOM | 7304 | H3  | BGLC | 9  | -4.659 | -10.823 | -147.198 | 1.00 | 0.00 | CARR |
| ATOM | 7305 | O3  | BGLC | 9  | -4.426 | -8.941  | -148.084 | 1.00 | 2.00 | CARR |
| ATOM | 7306 | HO3 | BGLC | 9  | -5.304 | -8.598  | -148.033 | 1.00 | 0.00 | CARR |
| ATOM | 7307 | C4  | BGLC | 9  | -2.639 | -10.561 | -147.609 | 1.00 | 2.00 | CARR |
| ATOM | 7308 | H4  | BGLC | 9  | -1.875 | -9.793  | -147.686 | 1.00 | 0.00 | CARR |
| ATOM | 7309 | O4  | BGLC | 9  | -2.598 | -11.109 | -148.891 | 1.00 | 2.00 | CARR |
| ATOM | 7310 | C6  | BGLC | 9  | -0.728 | -12.022 | -146.828 | 1.00 | 2.00 | CARR |
| ATOM | 7311 | O61 | BGLC | 9  | -0.635 | -13.415 | -147.065 | 1.00 | 0.00 | CARR |
| ATOM | 7312 | O62 | BGLC | 9  | -0.085 | -11.138 | -146.774 | 1.00 | 0.00 | CARR |
| ATOM | 7313 | C1  | BGLC | 10 | -2.437 | -10.595 | -150.029 | 1.00 | 2.00 | CARR |
| ATOM | 7314 | H1  | BGLC | 10 | -1.635 | -9.867  | -150.022 | 1.00 | 0.00 | CARR |
| ATOM | 7315 | C5  | BGLC | 10 | -3.607 | -9.425  | -151.749 | 1.00 | 2.00 | CARR |
| ATOM | 7316 | H5  | BGLC | 10 | -2.907 | -8.566  | -151.796 | 1.00 | 0.00 | CARR |
| ATOM | 7317 | O5  | BGLC | 10 | -3.634 | -9.986  | -150.449 | 1.00 | 2.00 | CARR |
| ATOM | 7318 | C2  | BGLC | 10 | -1.962 | -11.657 | -151.012 | 1.00 | 2.00 | CARR |
| ATOM | 7319 | H2  | BGLC | 10 | -2.738 | -12.489 | -151.010 | 1.00 | 0.00 | CARR |
| ATOM | 7320 | O2  | BGLC | 10 | -0.738 | -12.235 | -150.569 | 1.00 | 2.00 | CARR |
| ATOM | 7321 | HO2 | BGLC | 10 | -0.667 | -13.184 | -150.622 | 1.00 | 0.00 | CARR |
| ATOM | 7322 | C3  | BGLC | 10 | -1.814 | -11.054 | -152.393 | 1.00 | 2.00 | CARR |
| ATOM | 7323 | H3  | BGLC | 10 | -1.148 | -10.191 | -152.391 | 1.00 | 0.00 | CARR |
| ATOM | 7324 | O3  | BGLC | 10 | -1.380 | -12.077 | -153.269 | 1.00 | 2.00 | CARR |
| ATOM | 7325 | HO3 | BGLC | 10 | -0.501 | -12.418 | -153.218 | 1.00 | 0.00 | CARR |
| ATOM | 7326 | C4  | BGLC | 10 | -3.168 | -10.457 | -152.799 | 1.00 | 2.00 | CARR |
| ATOM | 7327 | H4  | BGLC | 10 | -3.933 | -11.224 | -152.873 | 1.00 | 0.00 | CARR |
| ATOM | 7328 | O4  | BGLC | 10 | -3.208 | -9.914  | -154.083 | 1.00 | 2.00 | CARR |
| ATOM | 7329 | C6  | BGLC | 10 | -5.078 | -8.991  | -152.022 | 1.00 | 2.00 | CARR |
| ATOM | 7330 | H61 | BGLC | 10 | -5.523 | -9.919  | -152.528 | 1.00 | 0.00 | CARR |
| ATOM | 7331 | H62 | BGLC | 10 | -5.731 | -8.827  | -151.171 | 1.00 | 0.00 | CARR |
| ATOM | 7332 | O6  | BGLC | 10 | -5.139 | -7.990  | -153.017 | 1.00 | 2.00 | CARR |
| ATOM | 7333 | HO6 | BGLC | 10 | -4.625 | -7.197  | -152.902 | 1.00 | 0.00 | CARR |
| ATOM | 7334 | C1  | BGLC | 11 | -3.372 | -10.432 | -155.219 | 1.00 | 2.00 | CARR |
| ATOM | 7335 | H1  | BGLC | 11 | -4.174 | -11.160 | -155.208 | 1.00 | 0.00 | CARR |
| ATOM | 7336 | C5  | BGLC | 11 | -2.203 | -11.608 | -156.935 | 1.00 | 2.00 | CARR |
| ATOM | 7337 | H5  | BGLC | 11 | -2.903 | -12.467 | -156.978 | 1.00 | 0.00 | CARR |
| ATOM | 7338 | O5  | BGLC | 11 | -2.174 | -11.042 | -155.638 | 1.00 | 2.00 | CARR |
| ATOM | 7339 | C2  | BGLC | 11 | -3.848 | -9.373  | -156.206 | 1.00 | 2.00 | CARR |
| ATOM | 7340 | H2  | BGLC | 11 | -3.073 | -8.540  | -156.208 | 1.00 | 0.00 | CARR |
| ATOM | 7341 | O2  | BGLC | 11 | -5.071 | -8.795  | -155.764 | 1.00 | 2.00 | CARR |
| ATOM | 7342 | HO2 | BGLC | 11 | -5.143 | -7.847  | -155.820 | 1.00 | 0.00 | CARR |



|      |      |     |      |    |        |         |          |      |      |      |
|------|------|-----|------|----|--------|---------|----------|------|------|------|
| ATOM | 7343 | C3  | BGLC | 11 | -3.996 | -9.982  | -157.584 | 1.00 | 2.00 | CARR |
| ATOM | 7344 | H3  | BGLC | 11 | -4.663 | -10.844 | -157.577 | 1.00 | 0.00 | CARR |
| ATOM | 7345 | O3  | BGLC | 11 | -4.431 | -8.962  | -158.464 | 1.00 | 2.00 | CARR |
| ATOM | 7346 | HO3 | BGLC | 11 | -5.310 | -8.621  | -158.414 | 1.00 | 0.00 | CARR |
| ATOM | 7347 | C4  | BGLC | 11 | -2.644 | -10.582 | -157.989 | 1.00 | 2.00 | CARR |
| ATOM | 7348 | H4  | BGLC | 11 | -1.881 | -9.813  | -158.066 | 1.00 | 0.00 | CARR |
| ATOM | 7349 | O4  | BGLC | 11 | -2.603 | -11.129 | -159.271 | 1.00 | 2.00 | CARR |
| ATOM | 7350 | C6  | BGLC | 11 | -0.732 | -12.043 | -157.208 | 1.00 | 2.00 | CARR |
| ATOM | 7351 | H61 | BGLC | 11 | -0.287 | -11.118 | -157.719 | 1.00 | 0.00 | CARR |
| ATOM | 7352 | H62 | BGLC | 11 | -0.078 | -12.203 | -156.357 | 1.00 | 0.00 | CARR |
| ATOM | 7353 | O6  | BGLC | 11 | -0.673 | -13.049 | -158.199 | 1.00 | 2.00 | CARR |
| ATOM | 7354 | HO6 | BGLC | 11 | -1.187 | -13.841 | -158.080 | 1.00 | 0.00 | CARR |
| ATOM | 7355 | C1  | BGLC | 12 | -2.442 | -10.615 | -160.409 | 1.00 | 2.00 | CARR |
| ATOM | 7356 | H1  | BGLC | 12 | -1.640 | -9.886  | -160.402 | 1.00 | 0.00 | CARR |
| ATOM | 7357 | C5  | BGLC | 12 | -3.610 | -9.446  | -162.129 | 1.00 | 2.00 | CARR |
| ATOM | 7358 | H5  | BGLC | 12 | -2.910 | -8.587  | -162.175 | 1.00 | 0.00 | CARR |
| ATOM | 7359 | O5  | BGLC | 12 | -3.638 | -10.008 | -160.829 | 1.00 | 2.00 | CARR |
| ATOM | 7360 | C2  | BGLC | 12 | -1.966 | -11.679 | -161.392 | 1.00 | 2.00 | CARR |
| ATOM | 7361 | H2  | BGLC | 12 | -2.742 | -12.511 | -161.391 | 1.00 | 0.00 | CARR |
| ATOM | 7362 | O2  | BGLC | 12 | -0.742 | -12.256 | -160.949 | 1.00 | 2.00 | CARR |
| ATOM | 7363 | HO2 | BGLC | 12 | -0.671 | -13.205 | -161.001 | 1.00 | 0.00 | CARR |
| ATOM | 7364 | C3  | BGLC | 12 | -1.817 | -11.075 | -162.773 | 1.00 | 2.00 | CARR |
| ATOM | 7365 | H3  | BGLC | 12 | -1.151 | -10.213 | -162.772 | 1.00 | 0.00 | CARR |
| ATOM | 7366 | O3  | BGLC | 12 | -1.385 | -12.099 | -163.649 | 1.00 | 2.00 | CARR |
| ATOM | 7367 | HO3 | BGLC | 12 | -0.507 | -12.442 | -163.598 | 1.00 | 0.00 | CARR |
| ATOM | 7368 | C4  | BGLC | 12 | -3.171 | -10.477 | -163.179 | 1.00 | 2.00 | CARR |
| ATOM | 7369 | H4  | BGLC | 12 | -3.935 | -11.245 | -163.252 | 1.00 | 0.00 | CARR |
| ATOM | 7370 | O4  | BGLC | 12 | -3.213 | -9.935  | -164.463 | 1.00 | 2.00 | CARR |
| ATOM | 7371 | C6  | BGLC | 12 | -5.082 | -9.012  | -162.402 | 1.00 | 2.00 | CARR |
| ATOM | 7372 | H61 | BGLC | 12 | -5.527 | -9.939  | -162.909 | 1.00 | 0.00 | CARR |
| ATOM | 7373 | H62 | BGLC | 12 | -5.735 | -8.849  | -161.551 | 1.00 | 0.00 | CARR |
| ATOM | 7374 | O6  | BGLC | 12 | -5.142 | -8.010  | -163.397 | 1.00 | 2.00 | CARR |
| ATOM | 7375 | HO6 | BGLC | 12 | -4.628 | -7.217  | -163.281 | 1.00 | 0.00 | CARR |
| ATOM | 7376 | C1  | BGLC | 13 | -3.376 | -10.452 | -165.599 | 1.00 | 2.00 | CARR |
| ATOM | 7377 | H1  | BGLC | 13 | -4.179 | -11.180 | -165.589 | 1.00 | 0.00 | CARR |
| ATOM | 7378 | C5  | BGLC | 13 | -2.208 | -11.628 | -167.315 | 1.00 | 2.00 | CARR |
| ATOM | 7379 | H5  | BGLC | 13 | -2.908 | -12.487 | -167.358 | 1.00 | 0.00 | CARR |
| ATOM | 7380 | O5  | BGLC | 13 | -2.179 | -11.063 | -166.018 | 1.00 | 2.00 | CARR |
| ATOM | 7381 | C2  | BGLC | 13 | -3.852 | -9.394  | -166.586 | 1.00 | 2.00 | CARR |
| ATOM | 7382 | H2  | BGLC | 13 | -3.077 | -8.561  | -166.589 | 1.00 | 0.00 | CARR |
| ATOM | 7383 | O2  | BGLC | 13 | -5.075 | -8.817  | -166.144 | 1.00 | 2.00 | CARR |
| ATOM | 7384 | HO2 | BGLC | 13 | -5.148 | -7.869  | -166.200 | 1.00 | 0.00 | CARR |
| ATOM | 7385 | C3  | BGLC | 13 | -4.001 | -10.003 | -167.964 | 1.00 | 2.00 | CARR |
| ATOM | 7386 | H3  | BGLC | 13 | -4.667 | -10.865 | -167.958 | 1.00 | 0.00 | CARR |
| ATOM | 7387 | O3  | BGLC | 13 | -4.436 | -8.982  | -168.844 | 1.00 | 2.00 | CARR |
| ATOM | 7388 | HO3 | BGLC | 13 | -5.315 | -8.641  | -168.793 | 1.00 | 0.00 | CARR |
| ATOM | 7389 | C4  | BGLC | 13 | -2.649 | -10.602 | -168.369 | 1.00 | 2.00 | CARR |
| ATOM | 7390 | H4  | BGLC | 13 | -1.887 | -9.833  | -168.445 | 1.00 | 0.00 | CARR |
| ATOM | 7391 | O4  | BGLC | 13 | -2.606 | -11.150 | -169.651 | 1.00 | 2.00 | CARR |
| ATOM | 7392 | C6  | BGLC | 13 | -0.737 | -12.063 | -167.588 | 1.00 | 2.00 | CARR |
| ATOM | 7393 | O61 | BGLC | 13 | -0.645 | -13.456 | -167.825 | 1.00 | 0.00 | CARR |
| ATOM | 7394 | O62 | BGLC | 13 | -0.094 | -11.179 | -167.535 | 1.00 | 0.00 | CARR |
| ATOM | 7395 | C1  | BGLC | 14 | -2.446 | -10.636 | -170.789 | 1.00 | 2.00 | CARR |
| ATOM | 7396 | H1  | BGLC | 14 | -1.644 | -9.907  | -170.783 | 1.00 | 0.00 | CARR |

|      |      |     |      |    |        |                 |      |      |      |
|------|------|-----|------|----|--------|-----------------|------|------|------|
| ATOM | 7397 | C5  | BGLC | 14 | -3.615 | -9.467-172.509  | 1.00 | 2.00 | CARR |
| ATOM | 7398 | H5  | BGLC | 14 | -2.915 | -8.608-172.556  | 1.00 | 0.00 | CARR |
| ATOM | 7399 | O5  | BGLC | 14 | -3.642 | -10.029-171.209 | 1.00 | 2.00 | CARR |
| ATOM | 7400 | C2  | BGLC | 14 | -1.970 | -11.698-171.772 | 1.00 | 2.00 | CARR |
| ATOM | 7401 | H2  | BGLC | 14 | -2.746 | -12.530-171.770 | 1.00 | 0.00 | CARR |
| ATOM | 7402 | O2  | BGLC | 14 | -0.746 | -12.276-171.329 | 1.00 | 2.00 | CARR |
| ATOM | 7403 | HO2 | BGLC | 14 | -0.675 | -13.225-171.382 | 1.00 | 0.00 | CARR |
| ATOM | 7404 | C3  | BGLC | 14 | -1.822 | -11.095-173.153 | 1.00 | 2.00 | CARR |
| ATOM | 7405 | H3  | BGLC | 14 | -1.156 | -10.233-173.152 | 1.00 | 0.00 | CARR |
| ATOM | 7406 | O3  | BGLC | 14 | -1.389 | -12.119-174.029 | 1.00 | 2.00 | CARR |
| ATOM | 7407 | HO3 | BGLC | 14 | -0.510 | -12.461-173.978 | 1.00 | 0.00 | CARR |
| ATOM | 7408 | C4  | BGLC | 14 | -3.176 | -10.498-173.559 | 1.00 | 2.00 | CARR |
| ATOM | 7409 | H4  | BGLC | 14 | -3.940 | -11.266-173.633 | 1.00 | 0.00 | CARR |
| ATOM | 7410 | O4  | BGLC | 14 | -3.217 | -9.955-174.843  | 1.00 | 2.00 | CARR |
| ATOM | 7411 | C6  | BGLC | 14 | -5.086 | -9.033-172.782  | 1.00 | 2.00 | CARR |
| ATOM | 7412 | H61 | BGLC | 14 | -5.531 | -9.960-173.290  | 1.00 | 0.00 | CARR |
| ATOM | 7413 | H62 | BGLC | 14 | -5.739 | -8.870-171.931  | 1.00 | 0.00 | CARR |
| ATOM | 7414 | O6  | BGLC | 14 | -5.146 | -8.030-173.777  | 1.00 | 2.00 | CARR |
| ATOM | 7415 | HO6 | BGLC | 14 | -4.632 | -7.237-173.661  | 1.00 | 0.00 | CARR |
| ATOM | 7416 | C1  | BGLC | 15 | -3.381 | -10.473-175.979 | 1.00 | 2.00 | CARR |
| ATOM | 7417 | H1  | BGLC | 15 | -4.184 | -11.201-175.968 | 1.00 | 0.00 | CARR |
| ATOM | 7418 | C5  | BGLC | 15 | -2.213 | -11.650-177.695 | 1.00 | 2.00 | CARR |
| ATOM | 7419 | H5  | BGLC | 15 | -2.913 | -12.509-177.737 | 1.00 | 0.00 | CARR |
| ATOM | 7420 | O5  | BGLC | 15 | -2.183 | -11.084-176.398 | 1.00 | 2.00 | CARR |
| ATOM | 7421 | C2  | BGLC | 15 | -3.857 | -9.414-176.966  | 1.00 | 2.00 | CARR |
| ATOM | 7422 | H2  | BGLC | 15 | -3.083 | -8.581-176.968  | 1.00 | 0.00 | CARR |
| ATOM | 7423 | O2  | BGLC | 15 | -5.080 | -8.837-176.524  | 1.00 | 2.00 | CARR |
| ATOM | 7424 | HO2 | BGLC | 15 | -5.152 | -7.889-176.579  | 1.00 | 0.00 | CARR |
| ATOM | 7425 | C3  | BGLC | 15 | -4.005 | -10.023-178.344 | 1.00 | 2.00 | CARR |
| ATOM | 7426 | H3  | BGLC | 15 | -4.671 | -10.885-178.338 | 1.00 | 0.00 | CARR |
| ATOM | 7427 | O3  | BGLC | 15 | -4.439 | -9.003-179.224  | 1.00 | 2.00 | CARR |
| ATOM | 7428 | HO3 | BGLC | 15 | -5.318 | -8.662-179.174  | 1.00 | 0.00 | CARR |
| ATOM | 7429 | C4  | BGLC | 15 | -2.653 | -10.622-178.749 | 1.00 | 2.00 | CARR |
| ATOM | 7430 | H4  | BGLC | 15 | -1.890 | -9.854-178.825  | 1.00 | 0.00 | CARR |
| ATOM | 7431 | O4  | BGLC | 15 | -2.611 | -11.170-180.031 | 1.00 | 2.00 | CARR |
| ATOM | 7432 | C6  | BGLC | 15 | -0.742 | -12.085-177.968 | 1.00 | 2.00 | CARR |
| ATOM | 7433 | H61 | BGLC | 15 | -0.298 | -11.159-178.479 | 1.00 | 0.00 | CARR |
| ATOM | 7434 | H62 | BGLC | 15 | -0.088 | -12.245-177.117 | 1.00 | 0.00 | CARR |
| ATOM | 7435 | O6  | BGLC | 15 | -0.681 | -13.091-178.959 | 1.00 | 2.00 | CARR |
| ATOM | 7436 | HO6 | BGLC | 15 | -1.194 | -13.884-178.840 | 1.00 | 0.00 | CARR |
| ATOM | 7437 | C1  | BGLC | 16 | -2.451 | -10.658-181.169 | 1.00 | 2.00 | CARR |
| ATOM | 7438 | H1  | BGLC | 16 | -1.648 | -9.930-181.164  | 1.00 | 0.00 | CARR |
| ATOM | 7439 | C5  | BGLC | 16 | -3.620 | -9.487-182.889  | 1.00 | 2.00 | CARR |
| ATOM | 7440 | H5  | BGLC | 16 | -2.920 | -8.628-182.936  | 1.00 | 0.00 | CARR |
| ATOM | 7441 | O5  | BGLC | 16 | -3.647 | -10.049-181.589 | 1.00 | 2.00 | CARR |
| ATOM | 7442 | C2  | BGLC | 16 | -1.975 | -11.719-182.152 | 1.00 | 2.00 | CARR |
| ATOM | 7443 | H2  | BGLC | 16 | -2.751 | -12.550-182.150 | 1.00 | 0.00 | CARR |
| ATOM | 7444 | O2  | BGLC | 16 | -0.751 | -12.297-181.709 | 1.00 | 2.00 | CARR |
| ATOM | 7445 | HO2 | BGLC | 16 | -0.680 | -13.246-181.762 | 1.00 | 0.00 | CARR |
| ATOM | 7446 | C3  | BGLC | 16 | -1.827 | -11.117-183.533 | 1.00 | 2.00 | CARR |
| ATOM | 7447 | H3  | BGLC | 16 | -1.160 | -10.255-183.531 | 1.00 | 0.00 | CARR |
| ATOM | 7448 | O3  | BGLC | 16 | -1.394 | -12.140-184.409 | 1.00 | 2.00 | CARR |
| ATOM | 7449 | HO3 | BGLC | 16 | -0.515 | -12.481-184.358 | 1.00 | 0.00 | CARR |
| ATOM | 7450 | C4  | BGLC | 16 | -3.181 | -10.518-183.939 | 1.00 | 2.00 | CARR |

|      |      |     |      |    |        |         |          |      |      |      |
|------|------|-----|------|----|--------|---------|----------|------|------|------|
| ATOM | 7451 | H4  | BGLC | 16 | -3.945 | -11.286 | -184.012 | 1.00 | 0.00 | CARR |
| ATOM | 7452 | O4  | BGLC | 16 | -3.222 | -9.976  | -185.223 | 1.00 | 2.00 | CARR |
| ATOM | 7453 | C6  | BGLC | 16 | -5.090 | -9.053  | -183.162 | 1.00 | 2.00 | CARR |
| ATOM | 7454 | H61 | BGLC | 16 | -5.535 | -9.981  | -183.668 | 1.00 | 0.00 | CARR |
| ATOM | 7455 | H62 | BGLC | 16 | -5.743 | -8.889  | -182.311 | 1.00 | 0.00 | CARR |
| ATOM | 7456 | O6  | BGLC | 16 | -5.151 | -8.052  | -184.157 | 1.00 | 2.00 | CARR |
| ATOM | 7457 | HO6 | BGLC | 16 | -4.637 | -7.259  | -184.042 | 1.00 | 0.00 | CARR |
| ATOM | 7458 | C1  | BGLC | 17 | -3.386 | -10.493 | -186.359 | 1.00 | 2.00 | CARR |
| ATOM | 7459 | H1  | BGLC | 17 | -4.189 | -11.221 | -186.348 | 1.00 | 0.00 | CARR |
| ATOM | 7460 | C5  | BGLC | 17 | -2.217 | -11.670 | -188.075 | 1.00 | 2.00 | CARR |
| ATOM | 7461 | H5  | BGLC | 17 | -2.918 | -12.529 | -188.117 | 1.00 | 0.00 | CARR |
| ATOM | 7462 | O5  | BGLC | 17 | -2.187 | -11.104 | -186.778 | 1.00 | 2.00 | CARR |
| ATOM | 7463 | C2  | BGLC | 17 | -3.862 | -9.435  | -187.346 | 1.00 | 2.00 | CARR |
| ATOM | 7464 | H2  | BGLC | 17 | -3.088 | -8.602  | -187.348 | 1.00 | 0.00 | CARR |
| ATOM | 7465 | O2  | BGLC | 17 | -5.085 | -8.858  | -186.904 | 1.00 | 2.00 | CARR |
| ATOM | 7466 | HO2 | BGLC | 17 | -5.158 | -7.910  | -186.960 | 1.00 | 0.00 | CARR |
| ATOM | 7467 | C3  | BGLC | 17 | -4.010 | -10.044 | -188.724 | 1.00 | 2.00 | CARR |
| ATOM | 7468 | H3  | BGLC | 17 | -4.676 | -10.906 | -188.719 | 1.00 | 0.00 | CARR |
| ATOM | 7469 | O3  | BGLC | 17 | -4.443 | -9.024  | -189.604 | 1.00 | 2.00 | CARR |
| ATOM | 7470 | HO3 | BGLC | 17 | -5.322 | -8.682  | -189.554 | 1.00 | 0.00 | CARR |
| ATOM | 7471 | C4  | BGLC | 17 | -2.656 | -10.643 | -189.129 | 1.00 | 2.00 | CARR |
| ATOM | 7472 | H4  | BGLC | 17 | -1.892 | -9.876  | -189.206 | 1.00 | 0.00 | CARR |
| ATOM | 7473 | O4  | BGLC | 17 | -2.616 | -11.191 | -190.411 | 1.00 | 2.00 | CARR |
| ATOM | 7474 | C6  | BGLC | 17 | -0.747 | -12.106 | -188.348 | 1.00 | 2.00 | CARR |
| ATOM | 7475 | H61 | BGLC | 17 | -0.302 | -11.180 | -188.858 | 1.00 | 0.00 | CARR |
| ATOM | 7476 | H62 | BGLC | 17 | -0.093 | -12.267 | -187.497 | 1.00 | 0.00 | CARR |
| ATOM | 7477 | O6  | BGLC | 17 | -0.686 | -13.111 | -189.339 | 1.00 | 2.00 | CARR |
| ATOM | 7478 | HO6 | BGLC | 17 | -1.200 | -13.904 | -189.221 | 1.00 | 0.00 | CARR |
| ATOM | 7479 | C1  | BGLC | 18 | -2.456 | -10.678 | -191.549 | 1.00 | 2.00 | CARR |
| ATOM | 7480 | H1  | BGLC | 18 | -1.654 | -9.949  | -191.544 | 1.00 | 0.00 | CARR |
| ATOM | 7481 | C5  | BGLC | 18 | -3.624 | -9.508  | -193.269 | 1.00 | 2.00 | CARR |
| ATOM | 7482 | H5  | BGLC | 18 | -2.924 | -8.649  | -193.315 | 1.00 | 0.00 | CARR |
| ATOM | 7483 | O5  | BGLC | 18 | -3.652 | -10.070 | -191.969 | 1.00 | 2.00 | CARR |
| ATOM | 7484 | C2  | BGLC | 18 | -1.978 | -11.739 | -192.532 | 1.00 | 2.00 | CARR |
| ATOM | 7485 | H2  | BGLC | 18 | -2.754 | -12.571 | -192.529 | 1.00 | 0.00 | CARR |
| ATOM | 7486 | O2  | BGLC | 18 | -0.755 | -12.316 | -192.089 | 1.00 | 2.00 | CARR |
| ATOM | 7487 | HO2 | BGLC | 18 | -0.683 | -13.264 | -192.143 | 1.00 | 0.00 | CARR |
| ATOM | 7488 | C3  | BGLC | 18 | -1.831 | -11.137 | -193.913 | 1.00 | 2.00 | CARR |
| ATOM | 7489 | H3  | BGLC | 18 | -1.165 | -10.275 | -193.911 | 1.00 | 0.00 | CARR |
| ATOM | 7490 | O3  | BGLC | 18 | -1.398 | -12.160 | -194.789 | 1.00 | 2.00 | CARR |
| ATOM | 7491 | HO3 | BGLC | 18 | -0.519 | -12.501 | -194.738 | 1.00 | 0.00 | CARR |
| ATOM | 7492 | C4  | BGLC | 18 | -3.186 | -10.539 | -194.319 | 1.00 | 2.00 | CARR |
| ATOM | 7493 | H4  | BGLC | 18 | -3.951 | -11.306 | -194.393 | 1.00 | 0.00 | CARR |
| ATOM | 7494 | O4  | BGLC | 18 | -3.226 | -9.997  | -195.603 | 1.00 | 2.00 | CARR |
| ATOM | 7495 | C6  | BGLC | 18 | -5.095 | -9.074  | -193.542 | 1.00 | 2.00 | CARR |
| ATOM | 7496 | H61 | BGLC | 18 | -5.540 | -10.001 | -194.049 | 1.00 | 0.00 | CARR |
| ATOM | 7497 | H62 | BGLC | 18 | -5.748 | -8.911  | -192.691 | 1.00 | 0.00 | CARR |
| ATOM | 7498 | O6  | BGLC | 18 | -5.156 | -8.072  | -194.537 | 1.00 | 2.00 | CARR |
| ATOM | 7499 | HO6 | BGLC | 18 | -4.642 | -7.279  | -194.422 | 1.00 | 0.00 | CARR |
| ATOM | 7500 | C1  | BGLC | 19 | -3.391 | -10.514 | -196.739 | 1.00 | 2.00 | CARR |
| ATOM | 7501 | H1  | BGLC | 19 | -4.194 | -11.242 | -196.728 | 1.00 | 0.00 | CARR |
| ATOM | 7502 | C5  | BGLC | 19 | -2.222 | -11.691 | -198.455 | 1.00 | 2.00 | CARR |
| ATOM | 7503 | H5  | BGLC | 19 | -2.922 | -12.550 | -198.497 | 1.00 | 0.00 | CARR |
| ATOM | 7504 | O5  | BGLC | 19 | -2.192 | -11.124 | -197.158 | 1.00 | 2.00 | CARR |
